# Supplementary material
Source: publisher figshare collection journal article supplement (https://gsapubs.figshare.com/ndownloader/files/28974897)
Supplement: Supplementary file 1 [file 28974897]

## Sheet: TableS1.TraceelementsSangangüey
TABLE S1. TRACE ELEMENT (ppm) COMPOSITION OF SANGANGÜEY INTRAPLATE ALKALI BASALTS, HAWAIITES AND MUGEARITES*
	XAL 125	XAL 118B	XAL 118A	XAL 128	XAL 123	XAL 108	XAL 107	XAL 116	XAL 122	XAL 127	XAL 138	XAL 126	XAL 110	XAL 124	XAL 120
Sc	27	25	24	25	25	26	26	27	20	21	21	27	24	22	23
V	215	197	193	194	203	221	218	225	172	179	176	269	294	233	127
Cr	530	390	300	190	240	220	240	200	140	130	130	110	20	20	20
Ni†	209	184	143	114	108	94	95	78	67	59	58	29	4	10.8	0
Rb	19	21	21	12	15	15	14	8	27	20	20	9	8	12	17
Ba	314	264	272	283	141	196	201	128	289	227	236	340	536	618	705
Th	3	3.3	3.5	2.5	1.7	2.5	2.5	1.5	4.4	3.4	3.5	1.5	1.5	1.4	3.1
U	1	1.1	1.1	0.9	0.7	0.8	0.9	0.6	1.4	1.2	1.2	0.6	0.5	0.5	0.9
Nb	36	38	41	30	26	32	33	22	49	41	40	17	16	15	40
Ta	2.5	2.6	2.8	2.2	1.8	2.2	2.2	1.5	3.3	2.8	2.7	1.2	1.1	1	2.7
La	27.4	30.1	33.1	25.4	20.1	25.2	25.8	18.8	37.9	31.9	32.8	48.3	27.8	18.8	46.4
Ce	54.6	59	65	49.9	43.3	52.1	53	41.8	74.6	64.4	66.1	46	47.2	39.9	95.2
Pr	6.26	6.8	7.5	6.05	5.32	6.2	6.31	5.34	8.41	7.53	7.69	11.5	7.52	5.4	12.9
Sr	460	479	483	452	444	471	487	424	462	463	451	568	609	702	505
Nd	24.1	25.6	29	24	21.7	24.8	25	22.4	31.6	30.1	30.5	47.9	32.1	23.6	55.2
Zr	186	196	226	228	209	208	212	212	280	275	281	154	159	139	301
Hf	3.9	4.1	4.7	4.7	4.3	4.4	4.6	4.3	5.9	5.8	5.8	3.6	3.9	3.6	6.5
Sm	5.2	5.4	5.9	5.4	5.2	5.4	5.5	5.6	6.5	6.5	6.5	10	7.4	5.4	12.4
Eu	1.77	1.81	1.98	1.85	1.81	1.91	1.95	1.99	2.17	2.19	2.12	3.22	2.61	2.01	4.32
Gd	5.1	5.1	5.9	5.7	5.5	5.6	5.9	6	6.5	6.4	6.6	10.8	7.9	5.5	12.6
Tb	0.8	0.8	0.9	0.9	0.9	0.9	0.9	1	1.1	1	1	1.6	1.2	0.9	1.8
Dy	4.8	4.9	5.5	5.4	5.3	5.3	5.6	5.8	6.2	6.3	6.2	9.2	7	4.9	10.7
Ho	1	1	1.1	1.1	1	1	1.1	1.1	1.2	1.2	1.2	1.7	1.4	0.9	2.1
Er	2.6	2.6	3.1	3	2.9	2.9	3.1	3.3	3.3	3.4	3.4	4.7	3.9	2.5	5.7
Yb	2.4	2.4	2.7	2.8	2.6	2.7	2.7	2.8	3	3.2	3.2	3.9	3.3	2.2	4.7
Y	22	22	25	27	25	25	25	27	28	29	29	46	38	21	55
Lu	0.37	0.38	0.41	0.44	0.42	0.43	0.43	0.45	0.48	0.49	0.51	0.59	0.51	0.34	0.71
*Trace element data were obtained by ICP-MS at Actlabs (see text for details)
†Ni concentrations obtained by X-ray fluorescence (XRF) at Franklin and Marshall College

## Sheet: Table S2. Titrations
TABLE S2. MEASURED FE2+O (WT%) FROM TITRATIONS FOLLOWING THE WILSON (1960) METHOD
Sample	Titration 1 Fe2+O (wt%)	Titration 2 Fe2+O (wt%)	Average Fe2+O (wt%)	±1𝞂	±2𝞂
XAL107	7.5913	7.9409	7.7661	0.24721	0.494419
XAL108	7.74476	7.6109	7.67783	0.094652	0.189304
XAL116	7.37385	7.39325	7.38355	0.0137169	0.0274339
XAL118A	6.57415	6.72446	6.6493	0.106279	0.212559
XAL118B	6.98351	6.95929	6.9714	0.0171262	0.0342524
XAL122	7.11992	7.06165	7.09078	0.0412004	0.0824008
XAL123*	5.54155	5.45608	5.49881	0.0604343	0.120869
XAL125	7.2443	7.19048	7.22	0.0380519	0.0761038
XAL126	7.45137	7.31285	7.38211	0.0979467	0.195893
XAL127	7.13871	7.05675	7.09773	0.0579568	0.115914
XAL128*	5.53112	5.45424	5.49268	0.0543668	0.108734
XAL138	7.66577	7.70596	7.68587	0.0284159	0.0568318
Standards	Titration 1 Fe2+O (wt%)	Titration 2 Fe2+O (wt%)	Average Fe2+O (wt%)	±1𝞂	Average Fe2+O (wt%) ±1𝞂 for all W-2a measurements
W-2a (01/30/20)	8.69	8.38	8.535	0.219203	8.51 ± 0.13
W-2a (01/18/20)	8.49	8.46	8.475	0.0212132
*Fe-Ti oxides show evidence of exsolution

## Sheet: Table S3. Standards
TABLE S3. LIST OF STANDARDS USED FOR ELECTRON MICROPROBE ANALYSES OF OLIVINE, PLAGIOCLAE AND FE-TI OXIDES
Element	Standard name abbreviation	Mineral name of the standard
Standards employed for olivine analyses on electron microprobe
Mg	FOBO	Bolten Forsterite
Si	FOBO	Bolten Forsterite
Fe	FESI	Ferrosillite (synthetic)
Ni	NIOL	Ni-olivine
Al	JADE	JD-1 Jadeite
Mn	BHRH	Rhodonite (Broken Hill)
Cr	Cr2O3	Cr2O3 (synthetic)
Ca	WOLL	Wollastonite (ANU)
Standards employed for plagioclase analyses on electron microprobe
Na	TAB, ALBA	Albite (Tiburion), Albite (Amelia)
Mg	GEIK	Geikelite (synthetic)
Ti	GEIK	Geikelite (synthetic)
Al	TANZ	Tanzanite
Si	GKFS, JADE	Adularia (St. Gothard), JD-1 Jadeite
K	GKFS	Adularia (St. Gothard)
Mn	BHRH	Rhodonite (Broken Hill)
Fe	FESI	Ferrosillite (synthetic)
Ca	WOLL	Wollastonite (ANU)
Standards employed for Fe-Ti oxides on electron microprobe
Mg	GEIK	Geikelite (synthetic)
Ti	Ilm USNM	Ilmenite (Ilmen Mountains, NMNH 96189)
Ca	WOLL	Wollastonite (ANU)
Si	WOLL	Wollastonite (ANU)
Al	TANZ, SILL	Tanzanite, Sillimanite H131013
Cr	Cr2O3	Cr2O3 (synthetic)
V	V2O5	V2O5 (synthetic)
Fe	Mag USNM	Magnetite (Minas Gerais, NMNH 114887)
Mn	BHRH	Rhodonite (Broken Hill)

## Sheet: Table S4. Trace elements TVF
TABLE S4. TRACE ELEMENT (ppm) COMPOSITION OF TVF ARC BASALTS
Sample	UR 6	UR 36	UR 46	NI 13	NI 27	APA 14	TAN 4B	TAN 19
Sc	N.D.	N.D.	N.D.	N.D.	N.D.	N.D.	N.D.	N.D.
V	170	176	198	161	162	182	167	160
Cr	380	330	470	370	310	230	200	330
Ni†	180	170	210	210	150	140	130	170
Rb	7	10	6	9	8	7	11	8
Ba	218	216	193	249	250	247	313	259
Th	0.6	1	0.6	0.8	0.6	0.7	1.1	0.6
U	0.2	0.3	0.2	0.3	0.2	0.3	0.4	0.2
Nb	2	2	1	2	1	5	7	2
Ta	0.2	0.2	0.1	0.2	1.5	1.5	0.6	1.4
La	8.8	9	7.2	9.4	8.2	13.3	15.5	10.3
Ce	19.7	20.7	16.4	20.8	18.1	28.4	33.5	22.2
Pr	2.69	2.77	2.31	2.64	2.47	3.52	4.25	2.87
Sr	512	523	488	516	539	517	541	555
Nd	12	12.3	10.7	11.9	11.3	15.4	18.6	12.6
Zr	73	90	63	81	71	95	127	77
Hf	1.9	2.2	1.8	2.1	2	2.4	3.1	2
Sm	2.8	3	2.6	2.9	2.7	3.5	4.2	3
Eu	1	1.09	0.95	0.99	1.01	1.19	1.37	1.03
Gd	2.7	3	2.8	2.8	2.8	3.3	3.9	2.8
Tb	0.4	0.5	0.4	0.4	0.4	0.5	0.6	0.4
Dy	2.6	2.9	2.7	2.5	2.5	3.2	3.6	2.5
Ho	0.5	0.6	0.5	0.5	0.5	0.6	0.7	0.5
Er	1.4	1.7	1.5	1.4	1.4	1.8	2	1.4
Yb	1.4	1.7	1.6	1.4	1.4	1.7	2	1.5
Y	15	17	16	15	15	18	21	15
Lu	0.24	0.27	0.27	0.23	0.23	0.28	0.31	0.22
Note: The results from this study were obtained to complement existing TVF data. Refer to text and figure captions to check references of other sources used in plots
*Trace element data were obtained by ICP-MS at Actlabs (see text for details)
†Ni concentrations obtained by X-ray fluorescence (XRF) at Franklin and Marshall College
N.D=Not determined

## Sheet: Table S5. Olivine compositions
TABLE S5. COMPOSITION OF INDIVIDUAL ANALYSES OF OLIVINE PER SAMPLE
Sample	Crystal	SiO2	Al2O3	FeO	MnO	MgO	CaO	Cr2O3	NiO	Total	Fo#
XAL 107	OL 15	40.8878	0.0812	10.9108	0.1484	47.0994	0.1927	0.0646	0.2775	99.6853	88.4993
XAL 107	OL 15	40.6305	0.061	10.9909	0.1569	47.0454	0.2771	0.0768	0.3125	99.557	88.4127
XAL 107	OL 15	40.7434	0.0661	10.8588	0.1798	47.2149	0.2462	0.0777	0.2842	99.6698	88.5724
XAL 107	OL 15	40.8092	0.0705	10.5515	0.1595	47.6757	0.251	0.0623	0.3191	99.8998	88.9555
XAL 107	OL 15	40.6406	0.0821	10.2723	0.1582	47.8253	0.2596	0.0929	0.3239	99.647	89.2464
XAL 107	OL 15	40.6098	0.0496	10.5281	0.1686	47.6109	0.2463	0.0698	0.3185	99.5987	88.9641
XAL 107	OL 15	40.8597	0.0619	10.3526	0.1326	47.631	0.2591	0.0528	0.3028	99.6606	89.1322
XAL 107	OL 15	40.6937	0.072	10.8424	0.1557	47.3559	0.2611	0.0433	0.3063	99.7494	88.6179
XAL 107	OL 15	40.6521	0.0864	10.4782	0.1424	47.5281	0.2102	0.0542	0.3255	99.4796	88.9937
XAL 107	OL 15	40.6473	0.0752	10.8221	0.1213	47.3157	0.2458	0.0589	0.317	99.6101	88.6283
XAL 107	OL 15	40.5047	0.0621	10.896	0.1728	47.3112	0.2878	0.0317	0.2924	99.5791	88.5586
XAL 107	OL 15	40.8651	0.1363	10.9688	0.1502	47.6328	0.2152	0.0545	0.3128	100.347	88.5596
XAL 107	OL 15	40.5727	0.0558	10.9598	0.13	47.1007	0.2525	0.0355	0.2745	99.384	88.4537
XAL 107	OL 15	40.6692	0.0587	10.5807	0.1373	47.3496	0.2344	0.1014	0.3064	99.4648	88.8607
XAL 107	OL 19	40.6959	0.0505	10.1375	0.1482	47.5707	0.2497	0.0366	0.3075	99.2124	89.3219
XAL 107	OL 19	40.7775	0.0809	9.9931	0.1368	47.7354	0.2556	0.0827	0.2786	99.3603	89.4904
XAL 107	OL 19	40.8131	0.0593	10.0894	0.1225	47.5499	0.2893	0.0425	0.2364	99.2135	89.3628
XAL 107	OL 19	40.6048	0.0787	10.6924	0.1475	47.1938	0.2816	0.0692	0.2149	99.2702	88.7234
XAL 107	OL 19	40.4733	0.0656	11.6807	0.1708	46.4984	0.2414	0.0417	0.254	99.4283	87.6485
XAL 107	OL 19	40.815	0.0569	10.5598	0.1641	47.1014	0.2338	0.0341	0.3107	99.2842	88.8281
XAL 107	OL 22	40.1038	0.0618	11.5273	0.1524	46.6928	0.2437	0.0784	0.2736	99.1249	87.8354
XAL 107	OL 22	40.1959	0.0537	11.3934	0.1748	46.8125	0.2349	0.0478	0.2844	99.213	87.9868
XAL 107	OL 22	40.2803	0.0755	11.2661	0.155	46.7464	0.2709	0.0629	0.2656	99.1293	88.0903
XAL 107	OL 22	40.3251	0.0584	11.5998	0.1916	46.3627	0.2576	0.0559	0.2769	99.1404	87.6919
XAL 107	OL 22	40.2537	0.0658	11.3871	0.1851	46.6651	0.2454	0.0426	0.2494	99.107	87.9594
XAL 107	OL 22	40.3195	0.0585	11.4063	0.1586	46.8743	0.2315	0.072	0.2596	99.3918	87.989
XAL 107	OL 23	40.5426	0.0692	11.757	0.1866	46.6398	0.2546	0.0475	0.2739	99.7912	87.6107
XAL 107	OL 23	40.6447	0.0558	11.657	0.1676	46.8062	0.2662	0.0603	0.2643	99.9154	87.7416
XAL 107	OL 23	40.5729	0.0569	11.6756	0.1687	46.7432	0.2301	0.0515	0.2939	99.807	87.7097
XAL 107	OL 23	40.5482	0.0648	11.7009	0.1653	46.7576	0.2504	0.0591	0.2312	99.7841	87.6899
XAL 107	OL 23	40.5353	0.0782	11.6495	0.154	46.8062	0.272	0.0454	0.2527	99.8137	87.7483
XAL 107	OL 23	40.4831	0.0482	11.8071	0.1798	46.7376	0.2423	0.0541	0.2748	99.8407	87.5874
XAL 107	OL 23	40.5426	0.0739	11.7471	0.2022	46.7974	0.236	0.0557	0.2666	99.9352	87.6563
XAL 107	OL 23	40.5919	0.0862	11.6529	0.1723	46.7856	0.2577	0.059	0.2641	99.8898	87.7406
XAL 107	OL 23	40.5316	0.0573	11.7013	0.1825	46.819	0.2367	0.0558	0.279	99.8693	87.7037
XAL 107	OL 23	40.3911	0.0385	12.7822	0.1743	45.7587	0.2606	0.0593	0.2926	99.7533	86.4526
XAL 107	OL 24	40.0445	0.0552	13.5611	0.2022	45.0278	0.2918	0.0349	0.1931	99.4125	85.5467
XAL 107	OL 24	40.3779	0.0633	12.689	0.1892	45.8594	0.2576	0.0571	0.2376	99.7436	86.5634
XAL 107	OL 24	40.3055	0.0696	12.4889	0.1713	45.8632	0.2615	0.0469	0.2327	99.4657	86.7484
XAL 107	OL 24	40.3403	0.0794	12.5032	0.1745	46.1806	0.2488	0.0491	0.2094	99.8173	86.8143
XAL 107	OL 24	40.1542	0.0699	12.4507	0.1955	45.9386	0.2551	0.0548	0.2413	99.3689	86.8022
XAL 107	OL 24	40.381	0.0745	12.5374	0.2088	45.9648	0.2438	0.0412	0.2327	99.7033	86.7292
XAL 107	OL 24	40.4171	0.0421	12.5056	0.1754	46.0556	0.2467	0.0787	0.2361	99.7576	86.7812
XAL 107	OL 24	40.2985	0.0537	12.838	0.178	45.6275	0.2652	0.0503	0.2092	99.5303	86.3675
XAL 107	OL 24	40.1837	0.0941	12.4153	0.1408	45.6542	0.3203	0.0672	0.2163	99.1097	86.7639
XAL 107	OL 24	40.4876	0.0974	12.564	0.173	46.0453	0.2302	0.0496	0.2245	99.8852	86.7249
XAL 107	OL 24	40.4607	0.035	12.5812	0.1446	46.1613	0.2289	0.0445	0.2348	99.9055	86.7381
XAL 107	OL 24	40.2781	0.057	12.7446	0.1822	45.747	0.239	0.0478	0.2456	99.5386	86.4838
XAL 107	OL 24	40.3258	0.1013	12.6647	0.1867	45.7866	0.2306	0.0479	0.2275	99.5753	86.5675
XAL 107	OL 24	40.3822	0.0703	12.3953	0.1637	46.0426	0.2371	0.0346	0.1956	99.5336	86.8792
XAL 107	OL 24	40.3402	0.0842	12.4968	0.142	45.8734	0.2551	0.0487	0.2387	99.5301	86.7435
XAL 107	OL 24	40.2181	0.0935	12.446	0.1632	45.9974	0.2412	0.0387	0.2562	99.4614	86.8214
XAL 107	OL 24	40.3446	0.063	12.4696	0.1832	45.9127	0.234	0.0317	0.2449	99.4921	86.7785
XAL 107	OL 24	40.3492	0.0585	12.4705	0.1779	45.835	0.2374	0.0096	0.2341	99.3941	86.7581
XAL 107	OL 25	40.4242	0.0807	11.1504	0.1633	46.7624	0.2426	0.0762	0.2966	99.1981	88.2016
XAL 107	OL 25	40.4308	0.0931	10.9381	0.1342	46.8192	0.2534	0.0781	0.3204	99.1115	88.4127
XAL 107	OL 25	40.3491	0.5599	11.003	0.1488	46.657	0.2754	0.0585	0.3168	99.3589	88.3162
XAL 107	OL 25	40.536	0.063	10.9705	0.1568	46.9411	0.2355	0.0434	0.3101	99.2673	88.4091
XAL 107	OL 25	40.4499	0.0761	10.9823	0.1795	46.8194	0.2443	0.0764	0.2862	99.117	88.3714
XAL 107	OL 25	40.4747	0.072	10.9699	0.1306	46.8574	0.2678	0.0382	0.299	99.123	88.3914
XAL 107	OL 25	40.4932	0.0838	11.0512	0.1571	46.9743	0.2406	0.0638	0.2926	99.3824	88.3409
XAL 107	OL 25	40.5702	0.0783	10.9128	0.1775	47.0654	0.2614	0.0546	0.3125	99.4552	88.4899
XAL 107	OL 25	40.4303	0.0601	11.0866	0.1283	47.1248	0.2533	0.0564	0.2932	99.4443	88.3409
XAL 107	OL 26	41.2305	0.0748	9.4319	0.1665	48.7302	0.2508	0.0828	0.35	100.349	90.2053
XAL 107	OL 26	41.4204	0.0646	9.4463	0.1321	48.7832	0.2476	0.0754	0.3434	100.514	90.2015
XAL 107	OL 26	41.4439	0.0785	9.4989	0.1363	48.9032	0.2468	0.0929	0.3534	100.77	90.1741
XAL 107	OL 26	41.5195	0.071	9.5336	0.1573	48.5722	0.2428	0.1006	0.3306	100.553	90.0812
XAL 107	OL 26	40.9784	0.0798	9.5855	0.144	48.5444	0.2489	0.0712	0.3437	100.013	90.0276
XAL 107	OL 26	41.0406	0.0955	9.4959	0.1616	48.3589	0.2311	0.0796	0.3618	99.838	90.0773
XAL 107	OL 26	41.3528	0.0527	9.3463	0.1543	48.7239	0.2439	0.0751	0.3356	100.289	90.2844
XAL 107	OL 26	41.0007	0.0688	9.3622	0.1584	48.6948	0.2439	0.0632	0.3238	99.8974	90.2646
XAL 107	OL 26	41.3611	0.0645	9.3904	0.1571	48.6786	0.2643	0.0785	0.3231	100.34	90.2351
XAL 107	OL 26	41.3556	0.0739	9.4216	0.1496	48.7725	0.2656	0.0499	0.2794	100.38	90.2229
XAL 107	OL 26	41.2885	0.0813	9.3433	0.1188	48.6923	0.2431	0.0883	0.3637	100.217	90.2817
XAL 107	OL 26	41.4304	0.0627	9.3563	0.1421	48.7838	0.252	0.0728	0.3558	100.453	90.2861
XAL 107	OL 26	41.061	0.2422	9.4064	0.1115	48.6733	0.3107	0.0971	0.3618	100.283	90.219
XAL 107	OL 26	41.1038	0.1146	9.3666	0.1193	48.7529	0.28	0.0922	0.3129	100.148	90.2708
XAL 107	OL 26	41.0711	0.0847	9.3768	0.1381	48.5039	0.2171	0.0647	0.3275	99.7837	90.2161
XAL 107	OL 26	41.3257	0.1065	9.4483	0.1323	48.6577	0.2375	0.1024	0.3387	100.345	90.177
XAL 107	OL 26	41.1848	0.0649	9.6595	0.1469	48.4978	0.2421	0.0418	0.327	100.167	89.9497
XAL 107	OL 26	40.8988	0.0807	9.2413	0.1521	48.1418	0.2479	0.0763	0.3272	99.1563	90.2784
XAL 107	OL 26	41.1538	0.066	9.5001	0.118	48.4306	0.2349	0.0701	0.3206	99.905	90.0867
XAL 107	OL 26	41.0801	0.0711	9.4844	0.1327	48.0159	0.2599	0.0806	0.3657	99.5061	90.0244
XAL 107	OL 29	40.9133	0.0631	11.1994	0.1699	47.0792	0.2415	0.0379	0.2689	99.9851	88.2262
XAL 107	OL 29	40.7045	0.0715	11.3051	0.171	47.075	0.2113	0.0603	0.2673	99.8718	88.1275
XAL 107	OL 29	40.7311	0.0424	11.0592	0.1561	47.2776	0.2411	0.0589	0.2698	99.8553	88.3997
XAL 107	OL 29	40.6945	0.0504	10.794	0.1725	47.3513	0.2543	0.0505	0.2913	99.6572	88.6618
XAL 107	OL 29	40.6733	0.0792	10.8395	0.1358	47.3869	0.239	0.0691	0.295	99.7115	88.6272
XAL 107	OL 29	40.6653	0.0629	11.0194	0.1826	47.0539	0.2555	0.0475	0.26	99.5549	88.3881
XAL 107	OL 29	40.5455	0.0439	11.2759	0.1511	46.8801	0.2185	0.0639	0.2724	99.4631	88.1112
XAL 107	OL 29	40.7498	0.0488	11.3219	0.1597	46.6916	0.224	0.0483	0.2473	99.5087	88.0259
XAL 107	OL 29	40.5671	0.0851	11.4836	0.194	46.6907	0.2265	0.0447	0.2764	99.5954	87.8756
XAL 107	OL 29	40.5261	0.0582	12.0961	0.1911	46.1728	0.2571	0.0504	0.268	99.6416	87.1866
XAL 107	OL 29	40.2591	0.6111	11.5242	0.1473	46.4595	0.2735	0.0625	0.2482	99.5738	87.7846
XAL 107	OL 29	40.4318	0.4964	11.6257	0.1787	46.391	0.24	0.0377	0.2664	99.6684	87.6745
XAL 107	OL 32	40.5012	0.0628	11.5299	0.1762	46.5022	0.2556	0.0584	0.2867	99.3979	87.7893
XAL 107	OL 32	40.3501	0.0764	11.2801	0.169	46.714	0.2667	0.0868	0.289	99.2354	88.07
XAL 107	OL 32	40.4144	0.0488	11.0593	0.1513	46.8335	0.2694	0.0771	0.2868	99.1547	88.3025
XAL 107	OL 32	40.3917	0.0533	11.3677	0.1193	46.8076	0.2692	0.0756	0.2939	99.3856	88.0096
XAL 107	OL 32	40.3442	0.0407	11.4081	0.1532	46.7722	0.2717	0.0589	0.3042	99.3597	87.9641
XAL 107	OL 32	40.5337	0.0502	11.1432	0.1297	46.6656	0.2532	0.0587	0.271	99.1107	88.1867
XAL 107	OL 32	40.4367	0.0564	11.1974	0.1787	46.6522	0.2544	0.0388	0.2539	99.0816	88.1332
XAL 107	OL 32	40.5391	0.0342	11.5825	0.1805	46.7432	0.2552	0.0615	0.2567	99.664	87.7958
XAL 107	OL 32	40.189	0.0542	11.5962	0.1659	46.6759	0.2318	0.0892	0.2777	99.2926	87.7676
XAL 107	OL 32	40.2349	0.0776	11.7175	0.179	46.5092	0.2351	0.0458	0.2601	99.2628	87.6168
XAL 107	OL 33	40.5773	0.0495	12.8953	0.172	45.6214	0.2486	0.0327	0.1863	99.7855	86.3133
XAL 107	OL 33	40.4931	0.0713	12.9583	0.1983	45.6622	0.2639	0.0223	0.1887	99.8793	86.2664
XAL 107	OL 33	40.6065	0.0582	13.1728	0.1372	45.7262	0.2461	0.0426	0.1925	100.19	86.0874
XAL 107	OL 33	40.3975	0.0754	12.961	0.1719	45.7733	0.2482	0.0147	0.1975	99.8448	86.2928
XAL 107	OL 33	40.3192	0.0554	13.0219	0.1826	45.718	0.2186	0.0216	0.1863	99.7459	86.223
XAL 107	OL 33	40.4753	0.0523	12.9148	0.1575	45.798	0.2368	0.0374	0.1821	99.8449	86.3413
XAL 107	OL 33	40.5092	0.0648	12.9662	0.1953	45.6986	0.2055	0.0374	0.1824	99.874	86.2686
XAL 107	OL 33	40.4527	0.5019	12.9358	0.168	45.7195	0.2431	0.0211	0.1621	100.206	86.3018
XAL 107	OL 33	40.6207	0.0442	13.0427	0.1884	45.651	0.2406	0.025	0.1865	100.015	86.1864
XAL 107	OL 33	40.728	0.0644	13.1406	0.2149	45.699	0.2481	0.0172	0.1981	100.319	86.1098
XAL 107	OL 33	40.4958	0.0558	13.1261	0.1562	45.8792	0.2444	0.0053	0.1938	100.162	86.1699
XAL 107	OL 33	40.42	0.0345	13.088	0.1795	45.5148	0.2376	0.0176	0.1824	99.7102	86.1094
XAL 107	OL 33	40.2402	0.0717	13.0618	0.1552	45.5297	0.2278	0.041	0.1955	99.5408	86.1371
XAL 107	OL 33	40.4778	0.0411	13.2678	0.1888	45.7054	0.227	0.0139	0.1973	100.105	85.9957
XAL 107	OL 33	40.6502	0.0735	13.0782	0.1687	45.607	0.2393	0.0255	0.1801	100.043	86.1426
XAL 107	OL 33	40.3619	0.0357	13.1051	0.2089	45.5742	0.2164	0.042	0.1869	99.7503	86.1094
XAL 107	OL 33	40.1118	0.0686	13.1903	0.1743	45.6568	0.2388	0.0327	0.2089	99.6841	86.0535
XAL 107	OL 33	40.4418	0.0693	12.9535	0.2045	45.6648	0.2254	0.0296	0.1977	99.7891	86.2715
XAL 107	OL 33	40.5848	0.0334	13.069	0.1525	45.1384	0.2292	0.0397	0.1912	99.4189	86.0272
XAL 107	OL 33	40.3834	0.0474	12.9781	0.2047	45.7524	0.2283	0.0207	0.1947	99.7958	86.2718
XAL 107	OL 33	40.4493	0.0954	12.9823	0.1912	45.6193	0.2317	0.0242	0.2178	99.7944	86.2332
XAL 107	OL 33	40.4081	0.0326	13.0737	0.1924	45.6658	0.2346	0.0404	0.1839	99.83	86.1619
XAL 107	OL 33b	40.6474	0.0428	12.991	0.1935	45.8059	0.2524	0.0298	0.1935	100.182	86.2737
XAL 107	OL 33b	40.701	0.0551	12.9354	0.1798	45.8504	0.2807	0.0442	0.155	100.214	86.336
XAL 107	OL 33b	40.7221	0.0494	12.9969	0.2085	45.6877	0.2224	0.0548	0.1651	100.118	86.2379
XAL 107	OL 33b	40.6722	0.0531	12.9127	0.162	45.6496	0.2473	0.0227	0.1672	99.9071	86.3051
XAL 107	OL 33b	40.6928	0.0549	12.9319	0.1738	45.7977	0.2351	0.0195	0.1803	100.088	86.3256
XAL 107	OL 33b	40.6661	0.0639	12.9742	0.1443	45.7499	0.277	0.0175	0.1812	100.087	86.2745
XAL 107	OL 33b	40.5831	0.0683	13.045	0.1762	45.8907	0.2384	0.0048	0.199	100.225	86.2465
XAL 107	OL 33b	40.806	0.0606	12.9576	0.151	45.884	0.2444	0.0166	0.1737	100.302	86.3243
XAL 107	OL 33b	40.7728	0.0661	12.9835	0.1722	45.9847	0.2372	0.0386	0.1767	100.437	86.3266
XAL 107	OL 33b	40.8254	0.057	13.1588	0.1523	45.9577	0.2254	0.0159	0.1798	100.578	86.1606
XAL 107	OL 33b	40.7783	0.0578	12.9323	0.1795	46.0296	0.2757	0.054	0.2086	100.525	86.3847
XAL 107	OL 33b	40.6995	0.0532	12.9131	0.1739	45.8564	0.2241	0.0243	0.1772	100.11	86.3577
XAL 107	OL 33b	40.5866	0.0466	13.0704	0.1779	45.9684	0.2604	0.0307	0.1749	100.339	86.2436
XAL 107	OL 33b	40.5708	0.0429	12.9295	0.193	46.0028	0.2439	0.0063	0.2026	100.209	86.3805
XAL 107	OL 33b	40.6679	0.0604	13.0365	0.1574	45.9921	0.2021	0.0268	0.1717	100.318	86.2803
XAL 107	OL 33b	40.8508	0.0649	13.0026	0.1672	46.1104	0.2355	0.0394	0.1792	100.659	86.3417
XAL 107	OL 33b	40.9411	0.0751	13.0396	0.1708	46.0099	0.2401	0.025	0.1834	100.696	86.2823
XAL 107	OL 33b	40.5987	0.0767	12.9748	0.1863	46.0061	0.2596	0.0153	0.1814	100.3	86.3401
XAL 107	OL 33b	40.8961	0.0401	13.1144	0.1462	45.9997	0.2722	0.0362	0.1881	100.717	86.2117
XAL 107	OL 33b	40.6559	0.0535	12.8766	0.1587	45.958	0.2453	0.0055	0.1714	100.126	86.4171
XAL 107B	OL 35	40.5058	0.3663	15.6517	0.2604	42.9321	0.809	0.0176	0.0609	100.604	83.0208
XAL 107B	OL 35	40.5085	0.0292	15.863	0.3043	43.8061	0.2556	0.0362	0.1036	100.906	83.1157
XAL 107B	OL 35	40.5685	0.0534	15.7493	0.2153	44	0.2889	-0.0124	0.024	100.887	83.278
XAL 107B	OL 35	40.5566	0.0741	15.6026	0.2781	43.9763	0.2942	0.0011	0.043	100.826	83.4004
XAL 107B	OL 35	40.4418	0.0688	15.5736	0.1913	44.1667	0.3107	-0.007	0.0208	100.766	83.4858
XAL 107B	OL 35	40.4841	0.0308	15.9851	0.2283	43.5728	0.2495	0.0184	0.1545	100.724	82.9325
XAL 107B	OL 35	40.4019	0.0369	15.9677	0.275	43.6236	0.2284	0.0165	0.162	100.712	82.9643
XAL 107B	OL 35	40.3911	0.0271	16.371	0.2736	43.3535	0.2595	0.0225	0.1249	100.823	82.5195
XAL 107B	OL 36	39.8499	0.0194	18.2717	0.2564	41.7893	0.2986	0.0245	0.0715	100.581	80.3032
XAL 107B	OL 36	40.3155	0.0304	16.2041	0.2499	43.7101	0.2275	0.0427	0.1908	100.971	82.7837
XAL 107B	OL 37	39.3432	0.0451	21.8529	0.3941	38.6695	0.3718	0.0123	0.0659	100.755	75.9288
XAL 107B	OL 37	40.4337	0.0343	16.3947	0.219	43.3479	0.2517	0.0259	0.1287	100.836	82.4967
XAL 107B	OL 38	40.0851	0.0366	18.2877	0.3172	41.5545	0.3042	0.0172	0.1212	100.724	80.1999
XAL 107B	OL 38	40.4798	0.031	17.2071	0.2255	42.588	0.2477	0.0219	0.1269	100.928	81.5223
XAL 107B	OL 38	40.0242	0.0444	17.7365	0.2461	42.3409	0.2829	0.0084	0.1161	100.799	80.9719
XAL 107B	OL 38	40.2482	0.0558	16.6545	0.3364	42.9291	0.2477	0.0279	0.1489	100.648	82.1264
XAL 107B	OL 38	40.122	0.0452	18.0474	0.2985	41.898	0.2714	0.0124	0.1104	100.805	80.5386
XAL 107B	OL 38	40.2726	0.0309	17.7674	0.2501	42.218	0.27	0.0246	0.0924	100.926	80.9002
XAL 107B	OL 39	41.4023	0.0478	11.4956	0.194	47.1957	0.2517	0.0442	0.2641	100.895	87.9786
XAL 107B	OL 39	41.4612	0.0731	11.2641	0.1711	47.2836	0.2483	0.0501	0.2473	100.799	88.2114
XAL 107B	OL 41	40.8993	0.0392	13.7767	0.2607	45.4926	0.2422	0.0301	0.1814	100.922	85.4784
XAL 107B	OL 41	40.6829	0.0253	14.3988	0.2147	45.1427	0.2549	0.0267	0.1571	100.903	84.8226
XAL 107B	OL 41	40.7264	0.0493	14.6097	0.1889	44.8168	0.2206	0.0363	0.1752	100.823	84.5398
XAL 107B	OL 41	40.4896	0.0342	15.8132	0.2673	43.9081	0.2513	0.0204	0.1403	100.924	83.1924
XAL 107B	OL 42	40.3357	0.0281	15.6761	0.2372	43.883	0.2606	0.014	0.1596	100.594	83.3056
XAL 107B	OL 42	40.7209	0.0542	13.9857	0.2132	45.2482	0.2236	0.0063	0.1673	100.619	85.223
XAL 107B	OL 42	40.8841	0.0465	13.8303	0.1977	45.363	0.2389	0.0304	0.1511	100.742	85.3947
XAL 107B	OL 42	40.5146	0.035	15.5022	0.2246	44.0043	0.2419	0.0309	0.1715	100.725	83.4983
XAL 107B	OL 42	40.9119	0.0379	13.8752	0.1767	45.4117	0.2354	0.0289	0.168	100.846	85.3677
XAL 107B	OL 43	40.4558	0.9403	16.2103	0.3259	41.0639	0.4232	0.0233	0.1409	99.5835	81.8698
XAL 107B	OL 43	40.7808	0.0366	14.2208	0.2972	45.0944	0.2424	0.0277	0.1615	100.861	84.9681
XAL 107B	OL 43	40.7422	0.0322	15.2609	0.189	44.2454	0.236	0.0478	0.1921	100.946	83.7879
XAL 107B	OL 44	40.281	0.0277	16.5615	0.333	43.1958	0.2736	0.0273	0.146	100.846	82.2987
XAL 107B	OL 45	40.2973	0.0187	16.7491	0.3344	42.9957	0.2766	0.0159	0.1346	100.822	82.066
XAL 107B	OL 46	40.0718	0.0427	17.4745	0.3711	42.3426	0.293	0.0194	0.1057	100.721	81.201
XAL 107B	OL 46	41.0551	0.0409	11.7352	0.1399	47.4012	0.2418	0.0573	0.3158	100.987	87.8052
XAL 107B	OL 46	41.2544	0.0482	11.5924	0.2115	47.3373	0.2338	0.0481	0.2665	100.992	87.9216
XAL 107B	OL 46	39.9141	0.0236	16.7408	0.2671	42.9894	0.2752	0.0201	0.1281	100.359	82.0712
XAL 107B	OL 47	40.2342	0.0297	16.8437	0.2626	42.9382	0.2578	0.0172	0.155	100.738	81.9631
XAL 107B	OL 47	40.166	0.0365	17.9219	0.2777	42.1424	0.2871	0.024	0.1005	100.956	80.7383
XAL 107B	OL 47	40.1913	0.0325	16.849	0.3239	43.0111	0.2598	0.0312	0.133	100.832	81.9836
XAL 107B	OL 47	40.3939	0.0203	16.8818	0.2135	42.9603	0.2684	0.0193	0.1139	100.871	81.9373
XAL 107B	OL 47	40.283	0.0402	16.7194	0.2565	43.0901	0.2588	0.0347	0.152	100.835	82.1244
XAL 107B	OL 47	40.0974	0.0548	17.8416	0.3374	42.1318	0.2909	0.0286	0.1476	100.93	80.8041
XAL 107B	OL 48	40.6732	0.0464	14.7854	0.229	44.5972	0.2293	0.0232	0.2192	100.803	84.3181
XAL 107B	OL 48	40.8879	0.0362	13.8238	0.1774	45.3831	0.2412	0.0321	0.2243	100.806	85.4061
XAL 107B	OL 48	40.8776	0.0346	13.7687	0.1852	45.3915	0.2332	0.0283	0.2304	100.749	85.4581
XAL 107B	OL 48	41.0308	0.0538	12.432	0.2178	46.5874	0.2475	0.0649	0.239	100.873	86.9793
XAL 107B	OL 48	40.5122	0.0057	16.4954	0.2799	43.2938	0.2643	0.0141	0.1255	100.991	82.3899
XAL 107B	OL 49	40.435	0.0427	16.2691	0.2001	43.4852	0.2377	0.0393	0.1836	100.893	82.6529
XAL 107B	OL 49	39.3137	0.0357	21.4228	0.437	39.1972	0.1821	0.0002	0.0589	100.647	76.5346
XAL 107B	OL 49	39.2464	0.0272	22.166	0.2625	38.6987	0.1877	0.0075	0.0767	100.673	75.6817
XAL 107B	OL 49	39.211	0.0316	22.3664	0.3228	38.5538	0.1856	0.0013	0.0552	100.728	75.4463
XAL 107B	OL 49	39.0975	0.0166	22.182	0.2982	38.6025	0.1808	0.0079	0.0541	100.439	75.6227
XAL 107B	OL 49	39.1465	0.03	22.0184	0.3314	38.7321	0.1713	0.0028	0.068	100.501	75.8203
XAL 107B	OL 49	39.7808	0.0296	18.478	0.321	41.5918	0.2194	0.0141	0.1486	100.583	80.0494
XAL 107B	OL 49	39.8557	0.0936	17.2504	0.3109	42.1082	0.2876	0.017	0.1232	100.047	81.313
XAL 107B	OL 50	40.3121	0.0349	17.1114	0.1588	42.7426	0.2809	0.0299	0.1372	100.808	81.6604
XAL 107B	OL 50	40.1054	0.0332	16.7825	0.2587	42.9049	0.2369	0.0273	0.1918	100.541	82.0053
XAL 107B	OL 50	38.9727	0.3191	22.4376	0.3729	37.9336	0.2039	-0.002	0.0756	100.313	75.0852
XAL 107B	OL 50	38.6992	0.0614	22.6525	0.3344	37.9785	0.1833	0.0073	0.1173	100.034	74.9287
XAL 107B	OL 50	38.7863	0.0348	22.6056	0.3762	38.0846	0.17	0	0.0843	100.142	75.0198
XAL 107B	OL 50	39.0773	0.0194	22.8027	0.3175	38.26	0.1829	-0.0027	0.0799	100.737	74.9433
XAL 107B	OL 50	38.9212	0.0368	22.8056	0.2977	38.2044	0.1783	-0.0009	0.0981	100.541	74.9138
XAL 107B	OL 50	38.9394	0.0328	22.7721	0.3824	38.1492	0.1749	-0.0023	0.0887	100.537	74.9139
XAL 107B	OL 50	38.879	0.0259	22.7926	0.3356	38.2508	0.1807	0.0048	0.0988	100.568	74.9471
XAL 107B	OL 50	38.9871	0.0215	22.5233	0.3123	38.6096	0.1725	0.0089	0.0853	100.72	75.3436
XAL 107B	OL 50	38.9735	0.0227	22.7835	0.3504	38.2893	0.1836	0.0058	0.1221	100.731	74.9734
XAL 107B	OL 51	40.5678	0.0443	14.9554	0.2137	44.7662	0.2069	0.0344	0.1907	100.979	84.2169
XAL 107B	OL 51	40.3998	0.0683	15.9831	0.226	43.7315	0.2106	0.0322	0.1536	100.805	82.9855
XAL 107B	OL 51	40.4318	0.0488	15.4666	0.1845	44.4532	0.1983	0.0107	0.188	100.982	83.6691
XAL 107B	OL 51	40.6684	0.0383	14.9916	0.2421	44.548	0.1987	0.0243	0.1992	100.911	84.1196
XAL 107B	OL 51	41.0855	0.0636	12.6145	0.1968	46.4779	0.2031	0.0357	0.2172	100.894	86.7863
XAL 107B	OL 52	40.0875	0.0486	17.8706	0.3115	42.2426	0.2809	0.0317	0.1242	100.998	80.8197
XAL 107B	OL 52	39.6967	0.0381	19.1639	0.2905	40.8787	0.301	0.0339	0.0693	100.472	79.1774
XAL 107B	OL 52	40.1818	0.0312	17.6147	0.2757	42.3422	0.2595	0.0251	0.0942	100.824	81.0784
XAL 107B	OL 52	40.3649	0.0377	16.8572	0.1731	42.8991	0.2472	0.0243	0.1317	100.735	81.9378
XAL 107B	OL 52	39.7946	0.0316	18.1582	0.3088	41.9554	0.2781	0.0206	0.1201	100.667	80.464
XAL 107B	OL 53	40.5524	0.0366	13.4296	0.2169	45.6634	0.2404	0.0421	0.249	100.43	85.8381
XAL 107B	OL 53	40.3219	0.0231	15.6667	0.2504	43.6896	0.1943	0.0281	0.1424	100.317	83.2525
XAL 107B	OL 53	40.1082	0.0353	15.5623	0.2367	43.7848	0.202	0.0134	0.1631	100.106	83.3758
XAL 107B	OL 53	40.1602	0.0219	16.0454	0.2252	43.3453	0.231	0.038	0.1435	100.211	82.8044
XAL 107B	OL 54	40.7294	0.0532	15.0588	0.2927	44.4188	0.2359	0.0199	0.1601	100.969	84.0206
XAL 107B	OL 55	40.9534	0.0937	10.0388	0.1881	47.8257	0.2378	0.0625	0.3585	99.7585	89.4653
XAL 107B	OL 55	41.6051	0.0517	9.5588	0.1602	48.7381	0.2443	0.0629	0.3888	100.81	90.0881
XAL 107B	OL 55	41.4713	0.0557	9.5744	0.1883	48.7142	0.242	0.073	0.364	100.683	90.0693
XAL 107B	OL 55	41.808	0.0541	9.5758	0.1637	48.6609	0.2464	0.0805	0.35	100.939	90.0581
XAL 107B	OL 56	42.5752	0.0633	10.9346	0.1633	46.5036	0.256	0.0467	0.2863	100.829	88.3466
XAL 107B	OL 56	41.7422	0.0784	9.4468	0.1562	48.9038	0.2467	0.0704	0.3357	100.98	90.2231
XAL 107B	OL 56	41.517	0.0587	9.3919	0.0894	48.7891	0.2536	0.0696	0.3311	100.5	90.2536
XAL 107B	OL 56	41.4788	0.076	9.4215	0.1518	48.9001	0.2488	0.0651	0.3315	100.674	90.2458
XAL 107B	OL 56	41.7127	0.0596	9.4729	0.1274	48.8201	0.2447	0.0554	0.32	100.813	90.1833
XAL 107B	OL 57	41.6786	0.0696	9.585	0.1422	48.7276	0.2435	0.0733	0.3277	100.847	90.0618
XAL 107B	OL 58	40.13	0.0312	17.1233	0.3031	42.947	0.2606	0.0245	0.1182	100.938	81.7216
XAL 107B	OL 58	39.2622	0.0388	21.9991	0.3434	38.9039	0.2047	0.0174	0.069	100.838	75.9173
XAL 107B	OL 58	39.2364	0.031	22.0428	0.3453	38.6148	0.1912	0.0172	0.0425	100.521	75.7443
XAL 107B	OL 58	39.237	0.0323	22.1542	0.3521	38.6307	0.2018	-0.0037	0.0491	100.653	75.6591
XAL 107B	OL 59	40.5155	0.0487	14.8457	0.2732	44.4906	0.2335	0.0452	0.213	100.665	84.2326
XAL 107B	OL 59	38.7722	0.0258	24.9017	0.3187	36.6314	0.1438	0.004	0.0128	100.81	72.3929
XAL 107B	OL 59	38.8785	0.046	24.8769	0.3163	36.6603	0.1552	0.0025	0.0216	100.957	72.4284
XAL 107B	OL 59	38.9795	0.0528	23.0573	0.3077	38.1434	0.1665	0.0145	0.0254	100.747	74.6764
XAL 107B	OL 59	40.3071	0.0219	16.1342	0.2403	43.4645	0.2478	0.0322	0.1367	100.585	82.7652
XAL 107B	OL 59	39.8694	0.0465	16.8221	0.2499	42.6468	0.2414	0.0333	0.1553	100.065	81.8813
XAL 107B	OL 59	40.128	0.044	16.0556	0.2931	43.3482	0.2245	0.0246	0.151	100.269	82.7965
XAL 107B	OL 59	40.3748	0.0288	16.046	0.3033	43.5835	0.2186	0.0191	0.1702	100.744	82.882
XAL 107B	OL 59	39.131	0.0226	23.134	0.3264	38.0159	0.1585	0.0074	0.0233	100.819	74.5503
XAL 107B	OL 59	38.8617	0.0431	24.8139	0.3311	36.678	0.1458	0.0034	0.0195	100.896	72.4886
XAL 107B	OL 59	38.8547	0.064	24.5965	0.2608	36.8108	0.1601	-0.0033	0.0247	100.768	72.7357
XAL 107B	OL 59	40.7878	0.0409	15.3263	0.1913	44.174	0.2199	0.024	0.1782	100.942	83.7075
XAL 107B	OL 60	38.3132	-0.0028	28.4398	0.3416	33.6015	0.0866	0.0016	0.0578	100.839	67.8055
XAL 107B	OL 60	38.038	-0.0072	28.1364	0.4654	33.9026	0.0767	-0.007	0.0749	100.68	68.2328
XAL 107B	OL 60	37.8285	0.0145	28.2416	0.4035	33.7759	0.072	0.0127	0.065	100.414	68.0704
XAL 107B	OL 60	38.0075	0.0068	28.3576	0.4202	33.8337	0.0788	-0.0029	0.0499	100.752	68.0186
XAL 107B	OL 60	38.2845	-0.0104	27.517	0.3875	34.4686	0.0857	-0.0014	0.0332	100.765	69.0682
XAL 107B	OL 60	38.0833	0.0008	28.3324	0.4237	33.886	0.082	0.0044	0.0367	100.849	68.0714
XAL 107B	OL 60	38.141	-0.0132	28.4407	0.3965	33.7572	0.0758	-0.0027	0.0244	100.82	67.9056
XAL 107B	OL 60	38.178	0.014	28.2159	0.3734	33.8524	0.0788	-0.0034	0.0349	100.744	68.1394
XAL 107B	OL 61	40.2758	0.0389	16.3218	0.2362	43.569	0.2486	0.0156	0.1317	100.838	82.6341
XAL 107B	OL 61	39.4782	0.0424	20.5833	0.2809	40.1024	0.2012	0.0068	0.0685	100.764	77.6437
XAL 107B	OL 61	40.4486	0.0267	16.0916	0.2521	43.4145	0.2461	0.0407	0.152	100.672	82.7863
XAL 107B	OL 62	41.1304	0.0478	11.1149	0.2246	47.4208	0.2434	0.0631	0.2682	100.513	88.3792
XAL 107B	OL 62	41.3295	0.0507	11.6768	0.163	47.1278	0.2431	0.0373	0.247	100.875	87.7968
XAL 107B	OL 62	40.1425	0.0141	17.2252	0.2326	42.6802	0.2734	0.015	0.1345	100.717	81.5391
XAL 107B	OL 64	41.1422	0.0419	11.6712	0.1996	47.0797	0.2655	0.0561	0.2697	100.726	87.7911
XAL 107B	OL 65	40.8766	0.0542	13.5109	0.244	45.677	0.2363	0.0364	0.2518	100.887	85.7682
XAL 107B	OL 66	40.8919	0.0493	13.2877	0.2041	45.9394	0.2281	0.0365	0.2338	100.871	86.0392
XAL 107B	OL 66	40.3354	0.0474	16.4337	0.2305	43.1418	0.2538	0.0201	0.1405	100.603	82.3932
XAL 107B	OL 67	40.5699	0.0435	15.0445	0.1886	44.5222	0.2083	0.029	0.1847	100.791	84.0645
XAL 107B	OL 67	40.9238	0.0611	13.7392	0.2498	45.5684	0.2393	0.0362	0.1782	100.996	85.5329
XAL 107B	OL 67	41.2689	0.0675	11.9468	0.1793	46.7931	0.2593	0.0306	0.2294	100.775	87.4718
XAL 107B	OL 67	41.2116	0.0471	12.008	0.1639	46.9152	0.2501	0.0521	0.2779	100.926	87.4445
XAL 107B	OL 68	39.4978	0.0309	20.7311	0.3461	39.9433	0.213	-0.0073	0.0728	100.828	77.45
XAL 107B	OL 68	39.3135	0.0285	21.9606	0.3355	39.0761	0.1693	0.0093	0.0539	100.947	76.0298
XAL 107B	OL 68	39.276	0.0244	22.499	0.3771	38.5023	0.1954	0.0088	0.0902	100.973	75.3118
XAL 107B	OL 68	39.5325	0.0346	21.6158	0.3495	39.0604	0.1931	0.0037	0.0659	100.856	76.3099
XAL 107B	OL 69	39.4131	0.0456	20.4645	0.3542	40.004	0.1684	0.0103	0.122	100.582	77.7014
XAL 107B	OL 69	41.1186	0.0498	12.3113	0.1368	46.2359	0.2434	0.0506	0.2636	100.41	87.004
XAL 107B	OL 70	40.1091	0.0308	16.7075	0.3162	43.0477	0.2506	0.0306	0.1623	100.655	82.1201
XAL 107B	OL 70	39.8114	0.056	19.0816	0.2582	41.2225	0.2144	0.0061	0.0861	100.736	79.3855
XAL 107B	OL 70	39.7434	0.0134	18.9576	0.2927	41.2285	0.2171	-0.0074	0.0935	100.539	79.4943
XAL 107B	OL 70	40.3343	0.0341	16.0488	0.2761	43.6186	0.2299	0.014	0.153	100.709	82.8909
XAL 107B	OL 71	40.3728	0.0493	16.1975	0.1908	43.6789	0.2343	0.0477	0.1615	100.933	82.7793
XAL 107B	OL 72	40.2362	0.0458	16.4672	0.3309	43.4547	0.2539	0.0187	0.1508	100.958	82.4686
XAL 107B	OL 72	40.5683	0.0152	16.688	0.3023	42.9768	0.2624	0.0232	0.1408	100.977	82.1132
XAL 107B	OL 72	40.0626	0	18.4091	0.2973	41.6945	0.2908	0.0212	0.1221	100.897	80.1483
XAL 107B	OL 72	40.1799	0.04	17.5343	0.3155	42.4499	0.2651	0.0423	0.1093	100.936	81.1874
XAL 107B	OL 73	40.7498	0.0307	14.4347	0.1974	45.0446	0.2491	0.027	0.1431	100.876	84.7623
XAL 107B	OL 73	40.9556	0.0551	12.3263	0.1852	46.4986	0.2404	0.0433	0.2265	100.531	87.0542
XAL 107B	OL 73	41.2294	0.0535	12.2122	0.1573	46.6729	0.236	0.0551	0.23	100.846	87.2005
XAL 107B	OL 73	40.9051	0.058	13.5765	0.2248	45.5338	0.2421	0.0378	0.1953	100.773	85.6703
XAL 107B	OL 73	40.1749	0.0405	16.6294	0.3173	43.1609	0.2551	0.0117	0.1514	100.741	82.2272
XAL 107B	OL 74	40.6138	0.2932	15.7738	0.2403	42.9833	0.2953	0.0393	0.1653	100.404	82.9278
XAL 107B	OL 75	41.3471	0.0426	11.8597	0.1717	46.9865	0.2443	0.0553	0.2663	100.973	87.5967
XAL 107B	OL 75	40.5258	0.0424	15.7184	0.2306	43.8574	0.229	0.039	0.1646	100.807	83.2601
XAL 107B	OL 76	40.4736	0.0274	15.8058	0.2138	43.8421	0.2313	0.0145	0.1814	100.79	83.1776
XAL 107B	OL 76	40.4676	0.0386	15.9799	0.1977	43.8021	0.2591	0.0421	0.1741	100.961	83.0111
XAL 107B	OL 77	40.8933	0.0302	13.8945	0.264	45.3343	0.2379	0.0144	0.1598	100.828	85.3288
XAL 107B	OL 77	41.0295	0.0412	14.28	0.1984	44.996	0.238	0.0271	0.1634	100.974	84.887
XAL 107B	OL 78	40.7274	0.0583	14.3218	0.202	45.2475	0.2475	0.0304	0.1569	100.992	84.9213
XAL 107B	OL 78	40.2494	0.0243	17.1652	0.2039	42.6855	0.2446	0.0279	0.1318	100.733	81.5933
XAL 107B	OL 79	40.4208	0.0358	16.3298	0.2413	43.3769	0.2362	0.0227	0.1345	100.798	82.5636
XAL 107B	OL 79	40.3056	0.0404	16.7779	0.3066	43.0028	0.2438	0.0206	0.1533	100.851	82.043
XAL 107B	OL 79	40.4742	0.0196	16.4329	0.2429	43.1927	0.2134	0.03	0.1474	100.753	82.411
XAL 107B	OL 79	40.4202	0.0477	16.1916	0.2518	43.4673	0.2369	0.0178	0.139	100.772	82.7153
XAL 107B	OL 79	40.6074	0.0338	16.2245	0.2021	43.4258	0.2483	0.032	0.1325	100.906	82.6727
XAL 107B	OL 80	40.8366	0.0396	14.7149	0.1781	44.6905	0.2223	0.0378	0.2089	100.929	84.4088
XAL 107B	OL 80	40.5503	0.0457	16.2876	0.2057	43.393	0.2329	0.016	0.1686	100.9	82.6062
XAL 107B	OL 80	40.3348	0.036	17.0306	0.2329	42.6624	0.2591	0.0276	0.1089	100.692	81.7033
XAL 107B	OL 81	40.1442	0.0303	18.1059	0.2717	41.8552	0.3034	0.0257	0.0941	100.831	80.4716
XAL 107B	OL 81	40.0617	0.2522	17.9361	0.2963	41.614	0.2795	0.0134	0.1324	100.585	80.529
XAL 107B	OL 81	40.1356	0.0264	18.3963	0.2839	41.6106	0.276	0.0134	0.1043	100.847	80.1273
XAL 107B	OL 84	40.1524	0.0295	17.8993	0.3205	42.0133	0.2633	0.0241	0.0854	100.788	80.7101
XAL 107B	OL 86	41.1813	0.0747	12.1047	0.159	46.7887	0.2459	0.0484	0.2625	100.865	87.3263
XAL 107B	OL 87	40.6591	0.0381	15.2561	0.2779	44.1977	0.2147	0.0418	0.1682	100.854	83.7775
XAL 107B	OL 87	41.3447	0.0597	11.6522	0.1996	47.1681	0.249	0.0489	0.2658	100.988	87.8284
XAL 107B	OL 87	40.8689	0.0724	13.5821	0.1956	45.5017	0.2289	0.0418	0.216	100.707	85.6567
XAL 107B	OL 87	40.336	0.0507	16.7668	0.2527	43.0392	0.2454	0.0204	0.1247	100.836	82.0652
XAL 108	OL 1	41.2478	0.0751	9.8545	0.1355	48.6331	0.2423	0.0537	0.2847	100.538	89.793
XAL 108	OL 1	41.0438	0.0535	9.7024	0.1313	48.842	0.2435	0.0642	0.3254	100.415	89.9734
XAL 108	OL 1	41.256	0.0805	9.5345	0.1417	48.8161	0.2662	0.0752	0.3179	100.505	90.1252
XAL 108	OL 1	41.4415	0.0526	9.4887	0.1343	49.0506	0.2404	0.0883	0.3375	100.827	90.2105
XAL 108	OL 4	40.6776	0.0581	12.0001	0.1681	46.4027	0.2479	0.042	0.271	99.8649	87.3306
XAL 108	OL 4	40.2596	0.0781	12.4125	0.1764	46.1725	0.2477	0.0495	0.2434	99.6286	86.8954
XAL 108	OL 4	40.317	0.0514	11.8492	0.1754	46.4186	0.2334	0.0423	0.2604	99.3555	87.4738
XAL 108	OL 4	40.2062	0.0393	12.8396	0.1765	46.1383	0.2062	0.053	0.2487	99.9164	86.4968
XAL 108	OL 4	40.086	0.0453	12.9824	0.2323	45.7553	0.1763	0.0518	0.2034	99.5553	86.2686
XAL 108	OL 4	40.2381	0.0571	11.4716	0.1531	46.9538	0.2515	0.0459	0.2927	99.4885	87.9463
XAL 108	OL 6	40.9094	0.108	10.8751	0.1353	47.7167	0.2775	0.047	0.2611	100.324	88.664
XAL 108	OL 6	40.817	0.0569	10.7699	0.124	47.8687	0.2485	0.0469	0.2524	100.189	88.7929
XAL 108	OL 6	40.7907	0.069	10.6334	0.1837	47.8679	0.2742	0.0518	0.2593	100.118	88.9192
XAL 108	OL 6	40.8155	0.0456	10.6482	0.149	47.7765	0.24	0.0557	0.3108	100.049	88.8866
XAL 108	OL 6	40.8834	0.045	10.7393	0.1569	47.8262	0.2425	0.0493	0.2764	100.234	88.8125
XAL 108	OL 6	40.906	0.0619	10.786	0.1726	47.7541	0.2613	0.0816	0.2916	100.314	88.7543
XAL 108	OL 10	40.4639	0.0506	11.6312	0.158	46.9125	0.22	0.0435	0.2452	99.7378	87.7897
XAL 108	OL 10	40.4975	0.1037	12.0423	0.1708	46.3132	0.2108	0.0346	0.235	99.6268	87.2703
XAL 108	OL 10	40.4722	0.0626	11.6773	0.1501	47.012	0.234	0.0573	0.2725	99.9491	87.7701
XAL 108	OL 10	40.6597	0.1126	11.322	0.1727	46.9043	0.2346	0.0341	0.2972	99.753	88.0738
XAL 108	OL 10	40.6875	0.0781	10.7894	0.1765	47.4402	0.2365	0.0792	0.288	99.7748	88.6852
XAL 108	OL 11	40.3153	0.0522	12.6053	0.1579	45.7885	0.2281	0.0594	0.244	99.4586	86.6224
XAL 108	OL 11	40.8695	0.0338	11.7822	0.1727	46.8894	0.2609	0.03	0.2618	100.329	87.6455
XAL 108	OL 11	40.263	0.0482	11.7724	0.1881	46.7875	0.251	0.0462	0.2784	99.6481	87.6309
XAL 108	OL 11	40.168	0.0624	11.6556	0.191	46.6675	0.254	0.0319	0.2907	99.3321	87.7108
XAL 108	OL 11	40.681	0.0593	11.6	0.1839	47.0167	0.2434	0.0308	0.2574	100.086	87.8422
XAL 108	OL 11	40.4776	0.0371	11.7311	0.1732	46.7341	0.2629	0.063	0.2376	99.7312	87.6565
XAL 108	OL 12	40.603	0.0669	11.7672	0.1627	46.6932	0.2536	0.0646	0.2645	99.8845	87.6137
XAL 108	OL 12	40.699	0.1546	11.8791	0.1888	46.8897	0.2535	0.0785	0.2915	100.421	87.5564
XAL 108	OL 12	40.9007	0.0576	11.646	0.1407	46.7868	0.2302	0.0499	0.2567	100.095	87.7472
XAL 108	OL 12	40.6163	0.0878	11.9869	0.1506	46.7389	0.2411	0.052	0.2824	100.156	87.4223
XAL 108	OL 12	40.576	0.0523	12.2504	0.184	46.5257	0.2329	0.046	0.2528	100.123	87.13
XAL 108	OL 12	40.6181	0.0507	12.4187	0.1805	46.5743	0.2333	0.0207	0.2252	100.327	86.988
XAL 108	OL 12	40.7158	0.0635	12.2966	0.216	46.4491	0.2504	0.0513	0.229	100.291	87.0692
XAL 108	OL 12	40.771	0.0622	11.953	0.1911	46.4358	0.2146	0.043	0.231	99.9367	87.3819
XAL 108	OL 12	40.7916	0.071	11.6805	0.1644	46.8935	0.2651	0.0527	0.2296	100.182	87.7398
XAL 108	OL 13	40.8591	0.1011	9.3963	0.1295	48.6239	0.2409	0.074	0.3568	99.7926	90.2195
XAL 108	OL 13	40.9712	0.06	9.3744	0.1407	48.6605	0.2553	0.0852	0.3254	99.9023	90.2467
XAL 108	OL 13	41.1165	0.0925	9.4061	0.1262	48.7696	0.2614	0.0909	0.33	100.185	90.2366
XAL 108	OL 13	41.1232	0.0544	9.2764	0.1322	48.7062	0.2506	0.0867	0.3521	99.9693	90.3472
XAL 108	OL 13	40.8834	0.0794	9.3611	0.1423	48.784	0.2433	0.0924	0.339	99.934	90.2814
XAL 108	OL 13	40.8853	0.0548	9.3959	0.1249	48.6694	0.2377	0.0664	0.3612	99.8409	90.2282
XAL 108	OL 13	41.0365	0.0728	9.3969	0.1385	49.0299	0.2322	0.0852	0.3394	100.337	90.2922
XAL 108	OL 13	40.9282	0.0697	9.3451	0.1607	48.8463	0.2596	0.075	0.3474	100.027	90.3077
XAL 108	OL 13	40.8622	0.0704	9.3634	0.1468	48.7821	0.2716	0.089	0.3573	99.958	90.279
XAL 108	OL 13	40.8174	0.0696	9.3249	0.1562	48.8779	0.2352	0.0646	0.353	99.9108	90.3323
XAL 108	OL 13	41.0725	0.0788	9.3485	0.1286	48.8734	0.2262	0.0721	0.3278	100.139	90.3093
XAL 108	OL 13	40.9733	0.0677	9.3575	0.1304	48.7693	0.2352	0.0682	0.3477	99.9499	90.2822
XAL 108	OL 13	40.9747	0.072	9.4002	0.1343	48.7853	0.2665	0.0868	0.3326	100.08	90.245
XAL 108	OL 13	40.9651	0.0697	9.3934	0.1684	48.8142	0.2527	0.0744	0.3501	100.095	90.2568
XAL 108	OL 13	40.8932	0.0578	9.3509	0.1256	48.6463	0.2544	0.0739	0.3325	99.7325	90.2664
XAL 108	OL 13	40.9746	0.0675	9.447	0.1408	48.7528	0.2407	0.0894	0.3288	100.052	90.1953
XAL 108	OL 13	40.9889	0.0676	9.3593	0.0978	48.7117	0.2421	0.0652	0.3367	99.8818	90.2703
XAL 108	OL 13	40.9876	0.0785	9.3597	0.1294	48.7106	0.2506	0.079	0.353	99.9521	90.2696
XAL 108	OL 13	41.0234	0.085	9.3016	0.1345	48.8011	0.2489	0.0762	0.3487	100.036	90.3405
XAL 108	OL 13	41.0978	0.0679	9.351	0.129	48.5961	0.254	0.109	0.3238	99.9363	90.2572
XAL 108	OL 14	40.9682	0.0659	9.7439	0.1532	48.4606	0.2342	0.08	0.3245	100.029	89.8637
XAL 108	OL 14	41.0406	0.0688	9.6093	0.1486	48.5738	0.2308	0.0625	0.3356	100.097	90.0107
XAL 108	OL 14	41.1519	0.0511	9.5805	0.1647	48.5301	0.2308	0.0667	0.3272	100.112	90.0297
XAL 108	OL 14	40.9366	0.0641	9.6766	0.1343	48.6951	0.2415	0.0641	0.3195	100.147	89.9704
XAL 108	OL 14	40.9375	0.0765	9.7913	0.1266	48.3731	0.2448	0.0659	0.3156	99.9338	89.8029
XAL 108	OL 14	40.8806	0.0712	9.7826	0.1492	48.3875	0.2178	0.0671	0.3288	99.8932	89.8136
XAL 108	OL 14	40.9594	0.0699	9.9388	0.1618	48.4691	0.2589	0.047	0.3385	100.248	89.6836
XAL 108	OL 14	40.9002	0.0673	10.0989	0.1645	48.3908	0.2614	0.0605	0.3	100.222	89.5196
XAL 108	OL 14	40.8213	0.0415	10.6206	0.1552	47.8475	0.2475	0.0898	0.3197	100.156	88.9268
XAL 108	OL 16	40.9785	0.0589	10.7707	0.1431	47.6536	0.2673	0.0555	0.3049	100.223	88.7473
XAL 108	OL 16	40.875	0.054	10.7731	0.1293	47.593	0.2498	0.0722	0.2927	100.062	88.7324
XAL 108	OL 16	40.9797	0.0669	10.5541	0.1518	47.7879	0.2743	0.0384	0.2991	100.178	88.9763
XAL 108	OL 16	40.9941	0.0605	10.8983	0.1478	47.5544	0.2707	0.0488	0.3023	100.288	88.6083
XAL 108	OL 16	40.933	0.0562	11.2592	0.1741	47.4925	0.2551	0.0311	0.2726	100.519	88.2618
XAL 108	OL 16	40.6688	0.0477	11.2654	0.1496	47.1947	0.2615	0.058	0.3326	99.9799	88.1905
XAL 108	OL 16	40.9233	0.0597	10.5772	0.1543	47.7725	0.2665	0.0688	0.3232	100.169	88.9515
XAL 108	OL 18	40.4283	0.0655	11.5019	0.1816	47.0161	0.2609	0.0418	0.2581	99.7782	87.9324
XAL 108	OL 18	40.5945	0.0714	10.7509	0.1459	47.5258	0.2621	0.0602	0.3223	99.7246	88.7391
XAL 108	OL 18	40.5397	0.0666	11.2381	0.1464	47.3133	0.2474	0.0334	0.2564	99.8697	88.242
XAL 108	OL 18	40.3874	0.0759	11.3374	0.1697	47.2525	0.2457	0.0374	0.2672	99.7854	88.137
XAL 108	OL 18	40.3886	0.3274	11.4875	0.1702	47.0809	0.2452	0.0398	0.2624	100.004	87.9601
XAL 108	OL 18	40.2172	0.0575	11.2285	0.1691	47.3335	0.232	0.0781	0.3025	99.6238	88.2551
XAL 108	OL 18	40.2915	0.0741	11.2425	0.1881	47.4267	0.2452	0.0579	0.2985	99.831	88.2626
XAL 108	OL 18	40.3436	0.0544	11.5771	0.1442	47.1854	0.2741	0.0415	0.2962	99.9221	87.9013
XAL 108	OL 20	40.5886	0.0667	10.6094	0.1716	47.5967	0.2501	0.0667	0.2912	99.6442	88.8854
XAL 108	OL 20	40.2728	0.0668	12.5519	0.158	46.1282	0.2272	0.0313	0.1429	99.5893	86.7567
XAL 108	OL 20	40.2087	0.0441	12.9986	0.1899	45.8291	0.2437	0.0252	0.0881	99.6416	86.273
XAL 108	OL 20	40.2638	0.058	12.8258	0.1766	46.0695	0.2425	-0.0036	0.0984	99.7444	86.4919
XAL 108	OL 20	40.2092	0.0617	12.4005	0.1891	46.3152	0.2379	0.0188	0.1167	99.5361	86.9414
XAL 108	OL 20	40.4521	0.0523	12.175	0.1669	46.4503	0.247	0.0295	0.1412	99.704	87.181
XAL 108	OL 20	40.1931	0.0731	13.556	0.2032	45.5529	0.2277	0.0097	0.0867	99.8996	85.694
XAL 108	OL 20	39.8406	0.0766	14.9561	0.2182	44.5754	0.2336	0.0033	0.0749	99.9894	84.1592
XAL 108	OL 20	39.7786	0.0721	15.1188	0.2051	44.152	0.2297	0.0017	0.0652	99.6309	83.8858
XAL 108	OL 20	40.2013	0.0518	12.7635	0.2133	45.8673	0.2539	0.0347	0.1093	99.5025	86.4974
XAL 108	OL 21	41.094	0.0604	9.5709	0.1427	48.4408	0.2504	0.0538	0.2809	99.9086	90.0222
XAL 108	OL 21	40.9822	0.0465	9.7828	0.152	48.146	0.2538	0.0518	0.2584	99.6841	89.7677
XAL 108	OL 21	40.9804	0.0619	9.8737	0.1592	48.3594	0.2515	0.055	0.2477	100.007	89.7232
XAL 108	OL 21	40.8824	0.055	10.0174	0.1418	48.038	0.2472	0.0411	0.2336	99.6683	89.5268
XAL 108	OL 21	40.7718	0.0482	9.9203	0.1388	48.025	0.2357	0.051	0.2189	99.4267	89.6154
XAL 108	OL 21	40.9053	0.1193	10.0218	0.1358	47.9032	0.2116	0.0341	0.2372	99.5933	89.4966
XAL 108	OL 21	40.8881	0.0568	10.0392	0.1369	48.1591	0.2454	0.0769	0.2512	99.8623	89.5301
XAL 108	OL 21	40.7843	0.0449	10.18	0.1515	48.1401	0.2338	0.0743	0.2651	99.8909	89.3954
XAL 108	OL 21	40.8384	0.0552	10.0297	0.1378	48.0648	0.2403	0.0438	0.2842	99.7103	89.5207
XAL 108	OL 21	40.9313	0.1044	10.1828	0.1701	48.1407	0.2544	0.0584	0.2155	100.062	89.3927
XAL 108	OL 21	40.7426	0.0722	10.2234	0.1546	48.1632	0.2244	0.0451	0.2142	99.8478	89.3595
XAL 108	OL 21	40.639	0.0586	10.1925	0.147	48.0146	0.2338	0.0522	0.2021	99.5474	89.3586
XAL 108	OL 21	40.6872	0.0519	10.1356	0.1849	47.949	0.242	0.0357	0.2108	99.4812	89.3987
XAL 108	OL 21	40.8746	0.0594	10.0526	0.1622	48.2183	0.2219	0.046	0.2585	99.9002	89.5293
XAL 108	OL 21	40.7459	0.0851	9.8947	0.1329	48.3224	0.2287	0.0432	0.2581	99.7352	89.6965
XAL 108	OL 21	40.9614	0.0672	9.7165	0.1544	48.2005	0.234	0.0674	0.29	99.715	89.8403
XAL 108	OL 21	40.9545	0.0747	9.6782	0.155	48.5477	0.2464	0.0666	0.3162	100.039	89.9414
XAL 108	OL 21	40.8351	0.0835	9.5766	0.1359	48.573	0.2481	0.0682	0.3213	99.8568	90.041
XAL 108	OL 21	41.0767	0.0794	9.5068	0.1494	48.4208	0.2358	0.0657	0.2973	99.846	90.0785
XAL 108	OL 21	40.9632	0.0662	9.5682	0.1395	48.4242	0.2344	0.0833	0.3358	99.8297	90.0216
XAL 108	OL 25	40.4166	0.0738	11.7394	0.1821	46.5797	0.2667	0.0735	0.2284	99.5793	87.6131
XAL 108	OL 25	40.6859	0.0595	11.5888	0.1676	46.8164	0.2634	0.0587	0.2379	99.9054	87.8069
XAL 108	OL 25	40.5533	0.0644	11.4469	0.1938	47.0337	0.2528	0.0502	0.2536	99.8495	87.9871
XAL 108	OL 25	40.4395	0.0564	11.3419	0.1633	46.6628	0.2605	0.0526	0.215	99.2064	88.0009
XAL 108	OL 25	40.6762	0.0889	11.428	0.155	47.1212	0.2554	0.0502	0.2502	100.025	88.0242
XAL 108	OL 25	40.5878	0.0502	11.4991	0.1687	46.9382	0.2656	0.0532	0.2333	99.8263	87.9173
XAL 108	OL 25	40.5265	0.0659	12.1059	0.157	46.6829	0.2419	0.0365	0.2327	100.052	87.2999
XAL 108	OL 25	40.2872	0.0817	13.1988	0.1792	45.8313	0.2507	0.0501	0.2337	100.114	86.0915
XAL 108	OL 25	40.3731	0.041	13.6312	0.2065	45.0197	0.2366	0.0257	0.1869	99.7251	85.4807
XAL 108	OL 29	40.8911	0.0698	10.4707	0.146	47.9188	0.2377	0.0507	0.3063	100.088	89.0806
XAL 108	OL 29	41.1817	0.0662	9.8066	0.126	48.3847	0.2482	0.0576	0.3557	100.245	89.7909
XAL 108	OL 29	41.0899	0.0785	9.5913	0.1206	48.7146	0.2436	0.09	0.3173	100.263	90.0537
XAL 108	OL 29	41.358	0.0544	9.5286	0.1446	48.6153	0.2519	0.0768	0.3369	100.371	90.0941
XAL 108	OL 29	41.2497	0.0658	9.5607	0.1451	48.6543	0.2655	0.0633	0.3177	100.317	90.071
XAL 108	OL 29	41.1354	0.0673	9.5138	0.1501	48.5064	0.2294	0.0755	0.3274	100.007	90.0877
XAL 108	OL 29	41.0702	0.0941	9.516	0.1219	48.6165	0.2539	0.0819	0.3344	100.104	90.1061
XAL 108	OL 29	41.1506	0.0816	9.5256	0.145	48.5509	0.2419	0.0867	0.2946	100.087	90.0849
XAL 108	OL 29	41.0806	0.0686	9.6151	0.1522	48.4552	0.2414	0.0567	0.3219	100.001	89.9831
XAL 108	OL 29	41.1989	0.0777	9.5463	0.1512	48.5839	0.2568	0.0607	0.3319	100.195	90.0715
XAL 108	OL 29	41.2217	0.0817	9.569	0.1666	48.4881	0.2376	0.0628	0.3159	100.168	90.0326
XAL 108	OL 29	41.0442	0.0592	9.6007	0.1447	48.4925	0.2496	0.0459	0.3247	99.9652	90.0036
XAL 108	OL 29	41.1349	0.0656	9.5307	0.1632	48.5004	0.2217	0.0682	0.3382	100.017	90.0707
XAL 108	OL 29	41.1974	0.0826	9.4667	0.1503	48.473	0.2526	0.1091	0.3388	100.049	90.1258
XAL 108	OL 29	41.1258	0.0666	9.4782	0.1415	48.6016	0.2612	0.1011	0.3347	100.127	90.1387
XAL 108	OL 29	41.2071	0.0647	9.4137	0.1409	48.5554	0.2595	0.0693	0.3177	100.031	90.1909
XAL 108	OL 29	41.189	0.0703	9.4545	0.1239	48.3421	0.2415	0.0973	0.3281	99.8613	90.1131
XAL 108	OL 29	41.0814	0.0564	9.8413	0.1453	48.3159	0.2371	0.0609	0.2998	100.029	89.7454
XAL 108	OL 29	41.1693	0.059	10.5662	0.1537	47.6743	0.2543	0.0609	0.312	100.251	88.9417
XAL 108	OL 30	41.0786	0.0537	10.476	0.1482	47.8537	0.2408	0.0736	0.3283	100.263	89.0625
XAL 108	OL 30	41.0842	0.0984	10.4101	0.1473	47.9912	0.2571	0.0495	0.3298	100.369	89.1516
XAL 108	OL 30	40.9775	0.0667	10.4149	0.1382	47.8787	0.2678	0.063	0.2958	100.127	89.1241
XAL 108	OL 30	40.9435	0.0609	10.5081	0.1734	47.7922	0.222	0.069	0.3038	100.085	89.0199
XAL 108	OL 30	40.9921	0.0631	10.6058	0.1519	47.7682	0.2228	0.0492	0.3077	100.18	88.9241
XAL 108	OL 30	40.9369	0.0642	10.6007	0.1472	47.824	0.2596	0.0491	0.2665	100.166	88.9405
XAL 108	OL 30	40.9642	0.082	10.7464	0.1754	47.7096	0.2505	0.0921	0.3045	100.337	88.7817
XAL 108	OL 30	40.9404	0.0323	10.8078	0.1478	47.5821	0.2552	0.0694	0.2744	100.104	88.6979
XAL 108	OL 30	40.9866	0.05	10.977	0.1621	47.512	0.2615	0.0758	0.3021	100.333	88.5263
XAL 108	OL 31	40.4927	0.0283	12.0009	0.1893	46.8463	0.2546	0.0555	0.279	100.162	87.4347
XAL 108	OL 31	40.3512	0.0651	11.9594	0.1614	46.7999	0.2876	0.03	0.2464	99.9235	87.4619
XAL 108	OL 31	40.3238	0.06	12.1341	0.1795	46.5245	0.2747	0.0397	0.226	99.7673	87.2364
XAL 108	OL 31	40.02	0.0508	12.0663	0.1733	46.599	0.255	0.024	0.2292	99.4108	87.3164
XAL 108	OL 31	40.1176	0.0463	11.8379	0.1668	46.5053	0.2517	0.041	0.2546	99.2569	87.5046
XAL 108	OL 31	40.1773	0.0581	11.8234	0.1766	46.6703	0.2415	0.0424	0.2679	99.4571	87.5567
XAL 108	OL 31	40.259	0.0672	12.1203	0.1657	46.4953	0.2435	0.0691	0.2522	99.6796	87.2419
XAL 108	OL 31	40.0972	0.0513	12.34	0.1838	46.3054	0.2362	0.0412	0.2285	99.4973	86.9945
XAL 108	OL 31	39.6991	0.0342	15.0872	0.1957	44.0658	0.2202	0.0236	0.2129	99.5775	83.8878
XAL 108	OL 31	39.2749	0.0523	16.4567	0.2707	42.9708	0.2388	0.0169	0.1567	99.4536	82.3151
XAL 108	OL 33	40.5799	0.0743	11.2142	0.1702	47.2883	0.2341	0.0708	0.3153	99.9305	88.2585
XAL 108	OL 33	40.736	0.089	11.1459	0.1774	47.1223	0.23	0.0609	0.261	99.8378	88.2854
XAL 108	OL 33	40.8061	0.0652	11.6383	0.2137	47.1393	0.1973	0.0209	0.2239	100.322	87.8349
XAL 108	OL 33	40.7051	0.0599	11.4257	0.2038	46.9289	0.2136	0.0539	0.2095	99.8088	87.9833
XAL 108	OL 33	40.9112	0.0854	10.9109	0.1789	47.2902	0.2411	0.0579	0.2673	99.9624	88.5402
XAL 108	OL 33	40.8782	0.0575	10.6252	0.1546	47.7006	0.2592	0.0527	0.2805	100.031	88.8922
XAL 108	OL 33	40.9561	0.0694	10.8789	0.1416	47.3378	0.236	0.0677	0.2766	99.9658	88.5801
XAL 108	OL 36	40.4421	0.0851	12.5387	0.1912	46.0388	0.2605	0.0538	0.2214	99.8409	86.7465
XAL 108	OL 36	40.5105	0.0708	11.6432	0.1456	47.0489	0.2494	0.0362	0.2733	99.9852	87.8097
XAL 108	OL 36	40.3726	0.0585	11.9731	0.1635	46.8481	0.2154	0.0812	0.2571	99.9524	87.4607
XAL 108	OL 36	40.3172	0.0526	12.8278	0.1881	46.0323	0.2335	0.0509	0.2015	99.92	86.4806
XAL 108	OL 36	40.423	0.0706	12.483	0.1951	46.2476	0.2349	0.0344	0.2253	99.9434	86.8494
XAL 108	OL 36	40.2133	0.0447	12.559	0.1724	46.0971	0.2421	0.0401	0.2436	99.6084	86.7425
XAL 108	OL 36	40.3096	0.0666	12.9684	0.1939	45.8637	0.2087	0.0554	0.2503	99.9373	86.3094
XAL 108	OL 36	40.0408	0.0465	13.8765	0.1781	44.8314	0.2437	0.0442	0.1839	99.4644	85.2051
XAL 108	OL 36	40.4094	0.0627	12.2091	0.2209	46.3458	0.1949	0.0597	0.2073	99.7057	87.1245
XAL 108	OL 37	40.5556	0.039	11.884	0.2013	46.7804	0.2577	0.0406	0.2718	100.043	87.5266
XAL 108	OL 37	40.5315	0.0559	11.716	0.1755	46.9306	0.2428	0.0511	0.2651	99.9709	87.7158
XAL 108	OL 37	40.4866	0.0482	11.9392	0.1978	46.5229	0.2304	0.034	0.251	99.7174	87.415
XAL 108	OL 37	40.4462	0.0334	11.813	0.1733	46.5875	0.2176	0.0487	0.2785	99.6105	87.547
XAL 108	OL 37	40.4733	0.0762	12.075	0.2171	46.5308	0.2789	0.0542	0.2379	99.9827	87.292
XAL 108	OL 37	40.631	0.0677	11.6226	0.1736	46.6292	0.2578	0.0602	0.2625	99.716	87.7326
XAL 108	OL 37	40.0724	0.0231	12.0619	0.1727	46.2422	0.2554	0.0701	0.2746	99.1953	87.2352
XAL 108	OL 38	41.0278	0.0429	10.9373	0.1461	47.4539	0.2686	0.0411	0.2367	100.167	88.5507
XAL 108	OL 38	41.1417	0.0626	10.1344	0.1641	48.2838	0.2269	0.0896	0.3202	100.44	89.4657
XAL 108	OL 38	41.1195	0.077	10.0675	0.1266	48.1868	0.2587	0.0612	0.3381	100.249	89.5091
XAL 108	OL 38	41.0889	0.0669	9.8358	0.1514	48.3367	0.2199	0.0648	0.3511	100.127	89.7545
XAL 108	OL 38	40.9604	0.0645	10.6726	0.1567	47.7133	0.2318	0.0414	0.339	100.207	88.8508
XAL 108	OL 40	40.9512	0.0536	11.7975	0.168	46.9849	0.2357	0.0414	0.2407	100.489	87.6533
XAL 108	OL 40	40.678	0.0451	12.7292	0.1878	46.1863	0.2084	0.0112	0.2189	100.272	86.6093
XAL 108	OL 40	40.6645	0.0498	11.6973	0.1818	46.8927	0.2476	0.0442	0.2814	100.06	87.7243
XAL 108	OL 40	40.6719	0.0616	12.1153	0.2002	46.6286	0.2133	0.045	0.2555	100.23	87.2784
XAL 108	OL 40	40.559	0.047	12.5537	0.2155	46.3317	0.2314	0.0217	0.2109	100.21	86.8055
XAL 108	OL 40	40.7725	0.0316	12.1358	0.1803	46.4737	0.2205	0.0205	0.2649	100.109	87.2228
XAL 108	OL 40	40.473	0.0466	12.1093	0.1603	46.3965	0.2402	0.027	0.2321	99.6984	87.2283
XAL 108	OL 40	40.858	0.0553	11.8987	0.1697	46.7463	0.2194	0.0197	0.2351	100.209	87.5049
XAL 108	OL 40	40.8368	0.0855	12.0669	0.1596	46.7027	0.224	0.0519	0.2468	100.379	87.3405
XAL 108	OL 40	40.8645	0.0663	11.8651	0.1823	46.7954	0.2254	0.0569	0.2698	100.326	87.5475
XAL 108	OL 41	40.3669	0.0857	13.6034	0.2308	45.4349	0.2021	0.0895	0.2422	100.287	85.6192
XAL 108	OL 41	40.9238	0.0637	11.7802	0.1705	46.9318	0.2348	0.0567	0.2755	100.463	87.6571
XAL 108	OL 41	40.9012	0.0413	11.5155	0.1928	47.1946	0.2447	0.0173	0.2597	100.375	87.9599
XAL 108	OL 41	41.081	0.063	11.6526	0.1703	47.1323	0.2908	0.0292	0.2538	100.69	87.8199
XAL 108	OL 41	40.8715	0.0938	11.7168	0.1848	47.0587	0.2395	0.0417	0.2609	100.489	87.7442
XAL 108	OL 41	40.6606	0.0555	12.3999	0.171	46.5185	0.2469	0.0529	0.2669	100.373	86.9918
XAL 108B	OL 46	40.3458	0.0391	17.2736	0.2215	42.5624	0.266	0.0166	0.1332	100.858	81.455
XAL 108B	OL 46	40.6189	0.0383	16.5945	0.2394	43.0638	0.2552	0.0354	0.1285	100.974	82.2252
XAL 108B	OL 47	40.232	0.0345	17.0443	0.2703	42.7551	0.2573	0.019	0.1297	100.742	81.7236
XAL 108B	OL 47	41.2334	0.0642	11.7444	0.2081	47.0596	0.2308	0.0667	0.27	100.877	87.719
XAL 108B	OL 47	40.2607	0.0542	16.3287	0.2887	43.2802	0.2546	0.0201	0.1316	100.619	82.5322
XAL 108B	OL 48	40.4696	0.046	15.3532	0.2618	43.886	0.2368	0.0408	0.2024	100.497	83.5942
XAL 108B	OL 48	40.3181	0.0664	15.9069	0.1656	42.5013	0.2027	0.0154	0.2132	99.3896	82.6476
XAL 108B	OL 49	41.1207	0.0663	12.0996	0.1442	46.6756	0.2498	0.0564	0.2485	100.661	87.3042
XAL 108B	OL 49	40.8731	0.0628	12.6323	0.133	46.2096	0.2493	0.0321	0.2707	100.463	86.7036
XAL 108B	OL 49	39.3449	0.0368	22.9624	0.3545	37.8056	0.2545	0.0069	0.1559	100.921	74.5863
XAL 108B	OL 49	40.3579	0.0406	16.8225	0.2467	42.7951	0.2819	0.0308	0.1584	100.734	81.9322
XAL 108B	OL 50	40.7306	0.0349	15.486	0.1622	44.0688	0.2362	0.0211	0.1655	100.905	83.5331
XAL 108B	OL 51	40.2445	0.0205	18.0938	0.2412	41.8233	0.2744	0.0334	0.1224	100.853	80.4701
XAL 108B	OL 51	41.0341	0.0472	13.8588	0.2589	45.1215	0.2573	0.0441	0.2353	100.857	85.3022
XAL 108B	OL 51	40.8872	0.0366	14.0712	0.162	45.0507	0.2393	0.0172	0.2016	100.666	85.0904
XAL 108B	OL 51	40.6663	0.051	15.5989	0.2859	43.8689	0.2389	0.0265	0.1907	100.927	83.3699
XAL 108B	OL 52	41.6207	0.0708	10.4725	0.1449	48.046	0.244	0.0635	0.2803	100.943	89.1045
XAL 108B	OL 52	41.6337	0.0618	10.4549	0.2368	47.9693	0.2379	0.0734	0.3131	100.981	89.1053
XAL 108B	OL 52	40.1511	0.0479	18.4606	0.2123	41.6237	0.2853	0.0198	0.1004	100.901	80.0767
XAL 108B	OL 52	40.4347	0.046	16.3434	0.3318	43.2986	0.2437	0.0248	0.1586	100.882	82.5255
XAL 108B	OL 53	41.2185	0.0431	12.9505	0.2054	46.1778	0.2505	0.0127	0.046	100.905	86.406
XAL 108B	OL 54	40.8824	0.0399	14.0188	0.1454	45.3353	0.2453	0.0216	0.1639	100.853	85.2175
XAL 108B	OL 54	40.9034	0.0436	13.857	0.1503	45.6059	0.2152	0.0153	0.1876	100.978	85.4373
XAL 108B	OL 54	40.9365	0.0358	13.7753	0.1498	45.5061	0.2408	0.0163	0.2006	100.861	85.4836
XAL 108B	OL 54	40.7974	0.0427	14.5861	0.1398	44.843	0.262	0.0313	0.1807	100.883	84.5687
XAL 108B	OL 55	40.5824	0.0386	16.6044	0.2347	43.0372	0.2564	0.0132	0.1409	100.908	82.2072
XAL 108B	OL 55	41.5058	0.0564	11.1224	0.1212	47.5424	0.3258	0.0247	0.1591	100.858	88.3987
XAL 108B	OL 55	41.3212	0.0264	12.0307	0.1805	46.8389	0.2361	0.0357	0.2533	100.923	87.4056
XAL 108B	OL 56	39.3976	0.0351	22.0993	0.3072	38.7599	0.1954	-0.0009	0.0568	100.85	75.7662
XAL 108B	OL 56	40.3172	0.0575	16.7995	0.2618	43.0965	0.2776	0.0166	0.1383	100.965	82.0561
XAL 108B	OL 56	40.5245	0.0242	16.0852	0.2758	43.6294	0.2474	0.0175	0.1214	100.925	82.8623
XAL 108B	OL 58	40.4355	0.0422	17.3774	0.2035	42.4671	0.2563	0.0054	0.1201	100.907	81.3304
XAL 108B	OL 59	40.9435	0.048	13.9091	0.209	45.3196	0.2088	0.0371	0.1872	100.862	85.3116
XAL 108B	OL 59	40.7779	0.0583	14.7501	0.2228	44.608	0.2197	0.0382	0.198	100.873	84.353
XAL 108B	OL 59	40.4557	0.0521	15.715	0.2168	43.9194	0.2158	0.0252	0.1896	100.79	83.2827
XAL 108B	OL 59	40.9052	0.0521	12.8772	0.1608	45.9078	0.2521	0.0653	0.2721	100.493	86.4038
XAL 108B	OL 59	41.5586	0.0624	11.1522	0.1379	47.3463	0.2405	0.0483	0.324	100.87	88.3286
XAL 108B	OL 59	41.705	0.0716	10.538	0.1128	47.9158	0.2453	0.0495	0.2711	100.909	89.0174
XAL 108B	OL 59	41.5065	0.0748	10.0909	0.2084	48.2394	0.263	0.0692	0.3126	100.765	89.4976
XAL 108B	OL 59	41.5168	0.0493	9.8184	0.1901	48.3303	0.2427	0.062	0.3099	100.519	89.7695
XAL 108B	OL 59	41.4956	0.0609	9.8668	0.1093	48.4143	0.2564	0.0626	0.3301	100.596	89.7403
XAL 108B	OL 59	41.6141	0.0433	10.0582	0.1217	48.3599	0.262	0.0786	0.3224	100.86	89.5514
XAL 108B	OL 59	41.3012	0.0469	11.2004	0.2107	47.5484	0.2511	0.0426	0.2704	100.872	88.328
XAL 108B	OL 59	41.2615	0.0716	12.6137	0.1558	46.241	0.218	0.0396	0.2112	100.812	86.7283
XAL 108B	OL 60	40.6171	0.0278	16.2366	0.2558	43.2195	0.2316	0.0248	0.1409	100.754	82.5934
XAL 108B	OL 60	40.6184	0.0434	16.3606	0.1573	43.3851	0.2826	0.0032	0.0491	100.9	82.539
XAL 108B	OL 60	40.4167	0.0405	16.7082	0.2717	42.8203	0.2623	0.0328	0.1342	100.687	82.0416
XAL 108B	OL 61	40.8666	0.0431	13.7922	0.1994	45.2767	0.2388	0.0292	0.174	100.62	85.4055
XAL 108B	OL 61	41.1508	0.0653	12.6617	0.1599	46.2672	0.2196	0.0208	0.2393	100.785	86.6911
XAL 108B	OL 61	41.2979	0.0845	12.5249	0.1314	46.209	0.2118	0.0217	0.2433	100.725	86.8016
XAL 108B	OL 61	41.1081	0.074	12.6616	0.2054	46.2667	0.2101	0.0183	0.213	100.757	86.6911
XAL 108B	OL 61	40.498	0.0213	15.719	0.266	43.8222	0.2341	0.0163	0.1223	100.699	83.2483
XAL 108B	OL 62	40.3223	0.0558	15.6499	0.2574	43.7504	0.2165	0.0295	0.1692	100.451	83.2871
XAL 108B	OL 62	40.8294	0.0538	14.2031	0.2188	45.0436	0.2409	0.0379	0.2259	100.853	84.9696
XAL 108B	OL 62	39.2625	0.0474	22.1393	0.2789	38.7005	0.1937	-0.0041	0.0898	100.708	75.7047
XAL 108B	OL 62	41.0008	0.0616	13.3097	0.2273	45.771	0.2555	0.0337	0.2672	100.927	85.9751
XAL 108B	OL 62	41.0592	0.0427	12.8685	0.2063	45.8712	0.255	0.0489	0.2472	100.599	86.4024
XAL 108B	OL 62	40.4639	0.0459	15.0796	0.263	44.1808	0.2325	0.0211	0.1804	100.467	83.9299
XAL 108B	OL 63	40.685	0.0267	14.8509	0.2317	44.7016	0.26	0.0331	0.1936	100.983	84.2905
XAL 108B	OL 63	40.6366	0.0533	15.1271	0.3103	44.2585	0.2543	0.0232	0.1965	100.86	83.9111
XAL 108B	OL 64	40.5008	0.0513	15.4734	0.1887	44.0143	0.2333	0.0237	0.196	100.681	83.527
XAL 108B	OL 64	41.2434	0.0851	11.8649	0.1466	46.962	0.2534	0.0614	0.2676	100.884	87.5863
XAL 108B	OL 64	41.0444	0.069	13.0731	0.2097	46.0312	0.2302	0.048	0.2292	100.935	86.2574
XAL 108B	OL 65	39.3073	0.0372	21.9369	0.3098	38.9247	0.1863	0.0022	0.076	100.78	75.979
XAL 108B	OL 65	39.343	0.024	22.1247	0.3512	38.626	0.2023	0.0149	0.0582	100.744	75.6815
XAL 108B	OL 65	39.4946	0.0245	22.121	0.3086	38.6653	0.1961	0.0017	0.0589	100.871	75.7033
XAL 108B	OL 65	39.3738	0.0376	22.221	0.3645	38.6794	0.196	0.0014	0.044	100.918	75.6269
XAL 108B	OL 65	40.3522	0.0406	17.4575	0.2346	42.3934	0.2646	0.0228	0.1133	100.879	81.2341
XAL 108B	OL 66	39.9497	0.0094	19.3156	0.2814	40.7873	0.2222	0.0246	0.0891	100.68	79.0098
XAL 108B	OL 66	39.784	0.0474	19.2466	0.2279	40.8893	0.2035	0.0081	0.0911	100.498	79.1104
XAL 108B	OL 66	39.8596	0.0392	19.2323	0.2967	40.8071	0.1996	-0.0045	0.0702	100.5	79.0894
XAL 108B	OL 66	39.9793	0.0282	19.3259	0.3639	40.7916	0.2105	-0.01	0.0661	100.755	79.0027
XAL 108B	OL 66	39.9035	0.036	19.374	0.3565	40.934	0.2051	0.0049	0.058	100.872	79.0195
XAL 108B	OL 66	40.0272	0.0384	19.4019	0.249	40.7803	0.2167	0.0026	0.073	100.789	78.9329
XAL 108B	OL 66	39.0882	0.1662	19.2082	0.2882	40.2362	0.3046	0.002	0.0698	99.3632	78.8765
XAL 108B	OL 66	39.6278	0.0229	18.9354	0.3021	41.5275	0.2156	0.002	0.0594	100.693	79.631
XAL 108B	OL 67	41.2459	0.049	11.7345	0.1446	46.9222	0.2415	0.0405	0.2933	100.671	87.6967
XAL 108B	OL 67	41.2705	0.0712	11.741	0.1608	47.0882	0.2569	0.042	0.2685	100.899	87.7289
XAL 108B	OL 67	41.2809	0.0555	11.966	0.2579	46.9193	0.2431	0.0297	0.2311	100.984	87.4836
XAL 108B	OL 68	40.6325	0.062	15.5914	0.1838	44.1357	0.272	-0.0092	0.0413	100.909	83.4604
XAL 108B	OL 68	40.8813	0.0418	14.9739	0.12	44.4273	0.2598	0.0014	0.0875	100.793	84.0991
XAL 108B	OL 68	40.458	0.0381	16.0568	0.2514	43.3128	0.2441	0.0214	0.164	100.547	82.7839
XAL 108B	OL 69	41.2104	0.046	12.5568	0.1728	46.3319	0.2357	0.0465	0.2571	100.857	86.8029
XAL 108B	OL 70	41.7523	0.0671	9.9772	0.1292	48.3635	0.2517	0.0693	0.3272	100.937	89.6275
XAL 108B	OL 70	41.7605	0.0576	9.7577	0.1489	48.518	0.2645	0.0704	0.3363	100.914	89.8615
XAL 108B	OL 70	41.7186	0.0815	9.7595	0.1066	48.4393	0.2541	0.0655	0.3463	100.772	89.845
XAL 108B	OL 70	41.7343	0.0263	9.7285	0.1654	48.4472	0.2801	0.0784	0.3435	100.804	89.8757
XAL 108B	OL 70	41.8105	0.0453	9.5555	0.1375	48.4805	0.261	0.0735	0.3451	100.709	90.044
XAL 108B	OL 70	41.6564	0.07	10.0261	0.147	48.3688	0.2376	0.0632	0.3057	100.875	89.5831
XAL 108B	OL 71	41.6373	0.0716	10.1077	0.1878	48.0215	0.2326	0.0763	0.334	100.669	89.4392
XAL 108B	OL 71	41.6869	0.065	9.6829	0.1479	48.5134	0.248	0.087	0.3522	100.783	89.9307
XAL 108B	OL 71	41.6938	0.0622	9.6671	0.1168	48.5876	0.259	0.0871	0.3491	100.823	89.9593
XAL 108B	OL 71	41.7725	0.0551	9.7642	0.1646	48.5324	0.239	0.0697	0.3529	100.95	89.8584
XAL 108B	OL 71	41.7495	0.0576	9.5458	0.1657	48.6005	0.2442	0.071	0.3235	100.758	90.0751
XAL 108B	OL 71	41.8533	0.0672	9.6017	0.1567	48.5958	0.256	0.0631	0.3242	100.918	90.022
XAL 108B	OL 71	41.7157	0.0388	9.554	0.1143	48.5589	0.2531	0.0677	0.3442	100.647	90.0599
XAL 108B	OL 71	41.6553	0.0799	9.5039	0.156	48.6056	0.2638	0.0662	0.3186	100.649	90.1154
XAL 108B	OL 71	41.6878	0.0675	9.5337	0.1693	48.6805	0.25	0.0714	0.3355	100.796	90.1011
XAL 108B	OL 71	41.8428	0.0728	9.5008	0.1111	48.6383	0.2406	0.0754	0.3699	100.852	90.1242
XAL 108B	OL 71	41.7492	0.0645	9.4617	0.1569	48.5289	0.2533	0.0641	0.325	100.604	90.1409
XAL 108B	OL 71	41.7972	0.0783	9.4925	0.1076	48.645	0.2569	0.0684	0.3433	100.789	90.133
XAL 108B	OL 71	41.719	0.0692	9.4959	0.1469	48.856	0.2531	0.0773	0.3316	100.949	90.1685
XAL 108B	OL 72	41.7003	0.0555	9.9295	0.1199	48.3018	0.2391	0.0731	0.3329	100.752	89.6603
XAL 108B	OL 72	41.7137	0.0753	9.5099	0.1845	48.6249	0.2518	0.0649	0.333	100.758	90.1131
XAL 108B	OL 72	41.4857	0.0693	9.4927	0.1202	48.4049	0.2542	0.0863	0.3495	100.263	90.0888
XAL 108B	OL 72	41.7323	0.0793	9.5613	0.1926	48.621	0.2374	0.0664	0.3227	100.813	90.0645
XAL 108B	OL 72	41.7611	0.0667	9.7943	0.213	48.4238	0.2554	0.065	0.358	100.937	89.8098
XAL 108B	OL 72	41.6888	0.0527	9.9984	0.1493	48.357	0.262	0.0608	0.313	100.882	89.6065
XAL 108B	OL 72	41.4821	0.0795	10.3761	0.1622	48.0442	0.2569	0.0684	0.3292	100.799	89.1938
XAL 108B	OL 72	41.5044	0.0657	10.8179	0.1624	47.6003	0.2471	0.0609	0.3206	100.779	88.6923
XAL 108B	OL 72	41.1901	0.0497	11.6136	0.2071	47.0712	0.2568	0.0476	0.2531	100.689	87.842
XAL 108B	OL 74	40.9863	0.0353	13.9669	0.2248	45.3087	0.2434	0.0277	0.1937	100.987	85.2568
XAL 108B	OL 74	40.8875	0.0381	13.9045	0.1774	45.149	0.2152	0.014	0.1784	100.564	85.2685
XAL 108B	OL 74	40.9228	0.034	13.9422	0.1925	45.2019	0.2415	0.0231	0.1848	100.743	85.2494
XAL 108B	OL 74	40.746	0.0576	14.0371	0.2786	45.4235	0.2189	0.0146	0.1933	100.97	85.2254
XAL 108B	OL 74	40.8961	0.0292	13.8876	0.1702	45.484	0.2343	-0.0027	0.1847	100.883	85.3765
XAL 108B	OL 74	40.8179	0.0501	13.8473	0.2281	45.3048	0.2319	0.0323	0.1804	100.693	85.3634
XAL 108B	OL 74	40.9843	0.0481	14.2419	0.1342	45.096	0.2511	0.0231	0.1778	100.956	84.9497
XAL 108B	OL 75	40.8721	0.0439	13.872	0.2487	45.3027	0.2319	0.0037	0.1959	100.771	85.3404
XAL 108B	OL 76	40.1066	0.0029	18.0241	0.2815	41.7885	0.3031	0.0176	0.1108	100.635	80.5179
XAL 108B	OL 76	40.8996	0.0611	13.8034	0.2373	45.1092	0.2303	0.0302	0.2455	100.617	85.3489
XAL 108B	OL 76	41.3648	0.0448	11.5844	0.1567	46.8527	0.2503	0.0434	0.2519	100.549	87.8192
XAL 108B	OL 76	40.3465	0.0299	16.0231	0.316	43.4181	0.2183	0.017	0.1583	100.527	82.8481
XAL 108B	OL 76	40.2795	0.0401	17.5227	0.2703	42.2856	0.2774	0.0237	0.1253	100.825	81.1381
XAL 108B	OL 76	40.1282	0.0393	17.9175	0.2826	41.8821	0.2914	0.014	0.1137	100.669	80.6457
XAL 108B	OL 76	40.2043	0.0192	18.0201	0.2968	41.9376	0.2889	0.03	0.0807	100.877	80.577
XAL 108B	OL 76	40.0283	0.0417	17.8045	0.2572	41.93	0.277	0.036	0.1072	100.482	80.7619
XAL 108B	OL 77	40.2414	0.0372	17.7357	0.3403	41.8782	0.2903	0.0235	0.1182	100.665	80.8028
XAL 108B	OL 77	39.292	0.0582	22.7314	0.3176	37.7054	0.1983	0.0146	0.0498	100.367	74.7273
XAL 108B	OL 77	39.3718	0.009	23.2513	0.3668	37.7136	0.1918	-0.0078	0.044	100.94	74.3021
XAL 108B	OL 77	40.9313	0.0578	14.9707	0.1674	44.3473	0.2409	0.028	0.1947	100.938	84.0778
XAL 108B	OL 77	40.0706	0.0417	18.7248	0.269	41.2145	0.3098	0.0194	0.1172	100.767	79.6897
XAL 108B	OL 77	40.2325	0.0352	17.5208	0.2926	42.1023	0.265	0.0101	0.1227	100.581	81.0734
XAL 108B	OL 77	40.2894	0.0442	16.9123	0.2021	42.7046	0.2703	0.0241	0.1273	100.574	81.8219
XAL 108B	OL 77	40.3053	0.0274	17.2911	0.2679	42.4915	0.2533	0.0212	0.1211	100.779	81.4145
XAL 108B	OL 78	39.7508	0.0359	19.7939	0.2639	40.2725	0.3308	0.021	0.0819	100.551	78.3868
XAL 108B	OL 78	40.7637	0.0619	14.8599	0.2069	44.5201	0.2271	0.0379	0.2014	100.879	84.2285
XAL 108B	OL 78	40.5218	0.0426	15.9066	0.2563	43.5985	0.2424	0.0315	0.1923	100.792	83.0103
XAL 108B	OL 79	41.1602	0.0373	13.725	0.2347	45.3873	0.2393	0.0258	0.1838	100.993	85.4963
XAL 108B	OL 79	41.1505	0.0512	13.9312	0.1088	45.1734	0.2361	0.0236	0.1676	100.842	85.2512
XAL 108B	OL 79	41.1311	0.0435	13.8106	0.1375	45.123	0.2311	0.0195	0.1895	100.686	85.3464
XAL 108B	OL 79	41.038	0.0624	13.8815	0.1947	45.2296	0.2364	0.0102	0.1728	100.826	85.3118
XAL 108B	OL 79	40.8942	0.0501	13.7955	0.2198	45.0656	0.2492	0.0177	0.1736	100.465	85.344
XAL 108B	OL 79	40.9794	0.0624	13.8481	0.1596	45.2196	0.2421	0.006	0.1781	100.695	85.3392
XAL 108B	OL 79	41.1604	0.0571	13.7865	0.1662	45.3677	0.2302	0.0282	0.172	100.968	85.4355
XAL 108B	OL 79	41.0339	0.0406	13.8475	0.2605	45.2136	0.2284	0.0164	0.153	100.794	85.3381
XAL 108B	OL 79	40.9127	0.041	13.8567	0.1839	45.1678	0.2359	0.0158	0.1744	100.588	85.3168
XAL 108B	OL 79	41.0121	0.0407	13.9498	0.2446	45.1623	0.2351	0.0061	0.1568	100.807	85.2313
XAL 108B	OL 79	41.0059	0.039	13.8641	0.19	45.1812	0.2335	0.011	0.1639	100.688	85.314
XAL 108B	OL 79	40.8324	0.0336	13.8921	0.2274	44.9132	0.2228	0.0105	0.1636	100.296	85.214
XAL 108B	OL 79	40.9897	0.0447	13.826	0.2399	45.0727	0.2335	0.0305	0.1485	100.585	85.3183
XAL 108B	OL 79	41.0754	0.0496	13.815	0.2525	45.167	0.2381	0.0155	0.1465	100.76	85.3544
XAL 108B	OL 79	40.9357	0.0427	13.8816	0.2285	45.2545	0.2396	0.0121	0.1481	100.743	85.3185
XAL 108B	OL 79	41.1941	0.0684	13.8599	0.1584	45.1015	0.2497	0.0141	0.15	100.796	85.2955
XAL 108B	OL 79	40.8894	0.0523	13.8955	0.2116	45.0727	0.2236	0.0077	0.1606	100.513	85.2553
XAL 108B	OL 79	41.0563	0.0508	13.9322	0.2495	45.2479	0.2298	0.0111	0.1668	100.944	85.271
XAL 108B	OL 79	41.0222	0.0504	13.8394	0.292	45.1219	0.2346	0.026	0.1534	100.74	85.32
XAL 108B	OL 79	41.1533	0.0336	13.8586	0.1646	45.0509	0.2299	0.0119	0.1427	100.645	85.2827
XAL 108B	OL 79	41.0222	0.0615	13.7179	0.1272	45.1767	0.2402	0.0131	0.1988	100.558	85.445
XAL 108B	OL 79	41.1036	0.03	13.8351	0.1857	45.2163	0.2297	0.0147	0.1714	100.786	85.3498
XAL 108B	OL 79	41.0985	0.0455	13.8137	0.1599	45.0993	0.2229	0.0038	0.1808	100.624	85.3369
XAL 108B	OL 79	40.9652	0.0406	13.817	0.1526	45.1789	0.2408	0.0117	0.1655	100.572	85.356
XAL 108B	OL 79	40.9689	0.0464	13.8388	0.168	45.3711	0.2167	0.0214	0.1613	100.793	85.3893
XAL 108B	OL 80	42.0524	0.0611	9.0159	0.1559	48.2722	0.2423	0.0794	0.2974	100.177	90.5159
XAL 108B	OL 80	41.5944	0.1988	9.9633	0.1644	48.1632	0.2576	0.0783	0.3392	100.759	89.6018
XAL 108B	OL 80	41.445	0.0504	11.7295	0.1266	46.9743	0.2472	0.0517	0.2878	100.912	87.7135
XAL 108B	OL 81	39.8434	0.0364	20.0087	0.3094	40.4154	0.1829	0.0173	0.094	100.908	78.2639
XAL 108B	OL 81	39.4514	0.031	22.4039	0.2788	38.5412	0.187	-0.0019	0.0502	100.942	75.4092
XAL 108B	OL 81	39.3953	0.0302	22.4149	0.2877	38.6038	0.1876	-0.0033	0.0529	100.969	75.4301
XAL 108B	OL 81	40.5306	0.0376	16.7851	0.2059	42.8716	0.2415	0.0082	0.1136	100.794	81.9918
XAL 108B	OL 82	40.5176	0.0417	16.612	0.2631	43.0541	0.2541	0.0258	0.1184	100.887	82.2066
XAL 108B	OL 82	40.7855	0.068	14.0962	0.2184	45.0406	0.2055	0.032	0.1951	100.641	85.0653
XAL 108B	OL 82	41.4623	0.0526	11.7693	0.1057	47.0171	0.2449	0.0412	0.2937	100.987	87.6866
XAL 108B	OL 82	41.4995	0.0881	11.1362	0.1599	47.4797	0.2589	0.0791	0.2899	100.991	88.3721
XAL 108B	OL 82	41.7513	0.0596	10.3769	0.2259	47.7966	0.2437	0.068	0.3176	100.84	89.143
XAL 108B	OL 82	41.6606	0.0419	10.1345	0.193	48.1053	0.2495	0.0863	0.3002	100.771	89.4308
XAL 108B	OL 82	41.5884	0.0853	9.8867	0.11	48.3261	0.2639	0.1919	0.271	100.723	89.7049
XAL 108B	OL 82	41.6587	0.0498	10.1457	0.1786	48.2326	0.249	0.0721	0.3128	100.899	89.4454
XAL 108B	OL 82	41.7261	0.0753	10.4912	0.1266	47.8358	0.2579	0.0598	0.323	100.896	89.0446
XAL 108B	OL 82	41.3443	0.071	11.2376	0.2009	47.2172	0.245	0.0699	0.2897	100.676	88.2214
XAL 108B	OL 82	40.5471	0.036	15.42	0.1925	43.7962	0.2239	0.0247	0.1421	100.382	83.5062
XAL 108B	OL 82	40.6174	0.0508	15.9359	0.2329	43.7127	0.2311	0.0288	0.1467	100.956	83.0212
XAL 108B	OL 82	41.2924	0.0555	12.2442	0.2034	46.5903	0.2387	0.0489	0.2179	100.891	87.1515
XAL 108B	OL 83	40.7004	0.0332	13.7514	0.2317	45.0471	0.2397	0.0178	0.1556	100.177	85.3788
XAL 108B	OL 83	40.6152	0.0321	14.0867	0.1797	45.0332	0.2451	0.0159	0.1	100.308	85.0717
XAL 108B	OL 83	41.0146	0.0377	14.1272	0.1643	44.8616	0.2437	0.0062	0.0737	100.529	84.9866
XAL 108B	OL 83	40.8845	0.0486	14.2617	0.2488	44.5361	0.2303	0.0106	0.0988	100.319	84.7714
XAL 108B	OL 83	40.9708	0.049	14.2505	0.212	44.5998	0.245	0.0115	0.0876	100.426	84.8001
XAL 108B	OL 83	41.036	0.0684	13.8731	0.2153	45.1423	0.2251	0.023	0.1687	100.752	85.2952
XAL 108B	OL 84	40.1553	0.0405	17.014	0.3887	42.6314	0.2781	0.0285	0.1012	100.638	81.707
XAL 108B	OL 84	40.9129	0.0446	14.3757	0.2079	44.8031	0.2436	0.032	0.1991	100.819	84.746
XAL 108B	OL 84	40.9454	0.0415	14.1058	0.196	45.1773	0.2526	0.0196	0.1653	100.903	85.0949
XAL 108B	OL 85	39.8522	0.0434	17.7339	0.2829	41.8008	0.2755	0.0237	0.1611	100.174	80.7757
XAL 108B	OL 85	38.7372	0.0167	25.428	0.4467	35.7155	0.1639	-0.0088	0.051	100.55	71.4595
XAL 108B	OL 85	40.3382	0.034	16.4938	0.2304	42.8887	0.2647	0.0242	0.1398	100.414	82.2546
XAL 108B	OL 86	40.8355	0.0537	14.1341	0.2145	45.0458	0.2316	0.0268	0.1532	100.695	85.0326
XAL 108B	OL 86	40.3671	0.0826	14.0161	0.1799	45.1691	0.2438	0.0408	0.1676	100.267	85.1734
XAL 108B	OL 86	40.8826	0.0505	14.6201	0.2119	44.7315	0.2162	0.0247	0.1823	100.92	84.5056
XAL 108B	OL 86	40.953	0.0665	14.5137	0.1934	44.5781	0.2048	0.0198	0.1663	100.695	84.5565
XAL 108B	OL 86	41.144	0.0718	14.1249	0.2177	44.7471	0.2172	0.0271	0.1484	100.698	84.9559
XAL 108B	OL 86	40.8917	0.0845	13.8717	0.2369	44.915	0.2303	0.0218	0.1632	100.415	85.2328
XAL 108B	OL 86	41.0083	0.0382	13.7008	0.1868	45.0972	0.2349	0.0322	0.168	100.466	85.4387
XAL 108B	OL 87	40.416	0.1392	16.2884	0.2776	42.9624	0.256	0.0101	0.1368	100.487	82.4615
XAL 108B	OL 87	40.0695	0.0221	17.8424	0.2346	41.8246	0.2351	0.0122	0.1149	100.355	80.6896
XAL 108B	OL 87	38.8477	0.0519	21.3674	0.3186	38.6568	0.1978	-0.0054	0.0708	99.5056	76.3311
XAL 108B	OL 87	39.8272	0.0479	19.2707	0.2082	41.0206	0.2266	0.0127	0.0969	100.711	79.1427
XAL 108B	OL 88	41.4292	0.0489	11.7626	0.1818	47.0067	0.2635	0.057	0.2384	100.988	87.6904
XAL 108B	OL 88	41.15	0.0623	12.4699	0.176	46.3559	0.252	0.0316	0.2549	100.753	86.8882
XAL 108B	OL 89	40.5647	0.0344	15.7524	0.2474	43.7152	0.2418	0.0422	0.1716	100.77	83.1847
XAL 108B	OL 89	40.5534	0.0515	16.1073	0.2293	43.6596	0.2194	0.0187	0.1559	100.995	82.8527
XAL 108B	OL 90	41.031	0.0443	14.4781	0.2472	44.7119	0.2263	0.042	0.2059	100.987	84.6273
XAL 108B	OL 90	41.6495	0.0732	9.9137	0.1383	48.3764	0.2464	0.1075	0.3121	100.817	89.6891
XAL 108B	OL 90	40.4118	0.0299	17.028	0.2257	42.5522	0.2479	0.018	0.137	100.65	81.6669
XAL 108B	OL 91	39.2548	0.0269	21.649	0.3464	38.7916	0.2039	0.005	0.0714	100.349	76.1571
XAL 108B	OL 91	39.2178	0.0266	21.5459	0.3028	38.8159	0.1853	0.005	0.0745	100.174	76.2549
XAL 108B	OL 92	40.4593	0.025	16.3486	0.3107	43.0069	0.2396	0.023	0.1594	100.573	82.423
XAL 108B	OL 92	41.3813	0.0626	11.5708	0.1627	47.145	0.2403	0.0674	0.2544	100.884	87.8981
XAL 108B	OL 92	41.4777	0.0588	10.5416	0.1361	47.8392	0.2436	0.0949	0.3173	100.709	88.9984
XAL 108B	OL 92	41.2934	0.0592	11.5132	0.2458	47.082	0.2243	0.0572	0.2925	100.768	87.9368
XAL 108B	OL 92	40.1043	0.0328	16.8459	0.2611	42.6563	0.226	0.0274	0.1259	100.28	81.8635
XAL 108B	OL 93	41.7303	0.0588	9.4491	0.1137	48.5391	0.2501	0.0731	0.3316	100.546	90.1544
XAL 108B	OL 93	41.8666	0.0502	9.4346	0.1538	48.7118	0.2623	0.0936	0.3343	100.907	90.1996
XAL 108B	OL 93	41.8644	0.0725	9.3526	0.1933	48.6638	0.2517	0.0687	0.3434	100.81	90.2678
XAL 108B	OL 93	41.8795	0.077	9.3259	0.2042	48.6292	0.2388	0.0602	0.3402	100.755	90.2866
XAL 108B	OL 94	41.013	0.0435	13.5323	0.238	45.5276	0.2472	0.0479	0.2391	100.889	85.7086
XAL 108B	OL 94	41.2673	0.0625	13.3656	0.1261	45.6693	0.2523	0.0367	0.1818	100.962	85.8975
XAL 108B	OL 94	41.0607	0.0484	13.8866	0.2483	45.1543	0.2399	0.0362	0.2185	100.893	85.2863
XAL110	OL 1	35.975	-0.0045	37.3534	0.6936	26.112	0.2988	-0.0063	-0.0103	100.412	55.4787
XAL110	OL 1	36.3395	0.0242	35.6207	0.6634	27.4159	0.3109	0.0055	0.0057	100.386	57.8413
XAL110	OL 1	36.5221	0.0135	33.8759	0.6932	29.0735	0.3264	0.0089	-0.0251	100.489	60.4724
XAL110	OL 1	36.1839	0.0238	36.3086	0.6309	26.8776	0.3188	-0.0025	-0.0098	100.331	56.8883
XAL110	OL 1	36.5533	0.0148	34.7513	0.6641	28.2244	0.3335	-0.0049	0.0056	100.542	59.1468
XAL110	OL 1	36.4867	0.0267	34.5456	0.6739	28.3287	0.3911	0.0047	-0.0083	100.449	59.379
XAL110	OL 1	36.9502	0.1103	33.3342	0.7094	29.2292	0.3712	-0.0098	0.0266	100.721	60.9841
XAL110	OL 1	36.8485	0.0021	31.8744	0.618	30.4874	0.2962	0.0003	0.014	100.141	63.0315
XAL110	OL 1	37.3331	0.0111	31.0288	0.5042	31.5155	0.2721	0.0087	-0.0053	100.668	64.4199
XAL110	OL 1	37.2354	0.0235	31.011	0.5509	31.5483	0.2604	-0.004	0.0057	100.631	64.4566
XAL110	OL 1	37.3405	0.0078	31.5263	0.6042	31.2215	0.2719	-0.0056	-0.0038	100.963	63.8383
XAL110	OL 2	37.6071	0.0099	29.5788	0.4388	32.3935	0.308	0.0022	0.0136	100.352	66.1272
XAL110	OL 2	37.7068	0.0466	29.6414	0.4403	32.7771	0.249	0.008	0.0055	100.875	66.3431
XAL110	OL 2	37.7772	0.021	29.1606	0.5531	33.2452	0.2001	0.0112	0.0281	100.997	67.0214
XAL110	OL 2	37.809	0.0157	28.6446	0.374	33.5443	0.177	-0.0095	-0.0002	100.555	67.6114
XAL110	OL 2	37.7684	0.0345	28.4108	0.4702	34.0633	0.1996	0.0097	0.0302	100.987	68.1247
XAL110	OL 2	37.7472	0.0268	29.1416	0.4363	33.1706	0.2058	0.0045	0.0234	100.756	66.9863
XAL110	OL 2	37.639	0.0149	29.9646	0.4774	32.3817	0.2396	0.0021	0.0179	100.737	65.8281
XAL110	OL 2	37.0985	0.0221	31.7006	0.5569	30.963	0.2944	0.0048	0.0122	100.653	63.5182
XAL110	OL 3	36.9839	0.0168	32.1761	0.5645	30.29	0.284	0.0028	-0.0024	100.316	62.6598
XAL110	OL 3	37.4287	0.0156	30.9766	0.4386	31.6339	0.2665	0.013	0.0216	100.794	64.5442
XAL110	OL 3	37.4558	0.0244	30.8898	0.5668	31.6057	0.2574	0.0092	-0.0097	100.799	64.588
XAL110	OL 3	37.2436	0.0076	31.0413	0.4787	31.5208	0.2449	0.0077	0.0193	100.564	64.4144
XAL110	OL 3	37.2666	-0.0004	31.5067	0.5665	31.2642	0.2626	0.008	0.0197	100.894	63.8841
XAL110	OL 3	37.2629	0.0214	32.0334	0.4618	30.8018	0.2787	0.0017	0.0088	100.87	63.1547
XAL110	OL 3	37.5175	0.018	30.5498	0.4654	32.1037	0.2344	0.0111	-0.0003	100.9	65.1962
XAL110	OL 3	37.3434	0.0053	30.54	0.5225	31.6095	0.2636	0.0073	0.0148	100.306	64.8507
XAL110	OL 3	37.2189	0.0065	31.7713	0.5774	30.8674	0.2762	0.0089	-0.0037	100.723	63.395
XAL110	OL 4	37.1378	0.0125	31.6312	0.5789	30.9597	0.3236	-0.0024	0.0082	100.65	63.5667
XAL110	OL 4	37.2784	0.0133	30.9499	0.5222	31.8504	0.2606	0.0005	0.0072	100.882	64.7199
XAL110	OL 4	37.4287	-0.0069	30.7353	0.5518	32.0053	0.2499	0.0049	0.0038	100.973	64.989
XAL110	OL 4	38.4354	0.2393	30.202	0.4957	31.2241	0.3168	-0.0043	0.0135	100.922	64.8248
XAL110	OL 5	36.7663	0.0342	34.2182	0.5447	29.0606	0.3449	-0.0091	0.0203	100.98	60.2212
XAL110	OL 5	36.8388	-0.0004	34.3402	0.5765	28.8243	0.3056	-0.0084	0.008	100.885	59.9401
XAL110	OL 5	36.435	0.0367	34.0364	0.7111	28.8404	0.3012	0.0033	0.024	100.388	60.1667
XAL110	OL 5	36.6884	0.0089	34.6221	0.7157	28.6468	0.2778	0.0086	0.0238	100.992	59.5949
XAL110	OL 5	36.9633	0.0032	32.5558	0.578	30.2918	0.2697	0.0045	-0.0001	100.666	62.3863
XAL110	OL 5	36.4925	0.0302	33.3336	0.5783	29.4974	0.3053	-0.0074	0.0103	100.24	61.2018
XAL110	OL 5	36.4719	0.0173	34.9098	0.6547	28.1672	0.3302	0.0035	-0.046	100.509	58.9876
XAL110	OL 5	36.3263	0	36.2598	0.6303	27.0755	0.3095	0.0004	0.0176	100.619	57.1013
XAL110	OL 5	37.0017	0.0307	32.6669	0.5912	30.3946	0.2909	-0.0107	-0.0082	100.957	62.3862
XAL110	OL 6	36.1738	-0.0048	35.9591	0.6678	27.4325	0.3049	0.0098	0.0131	100.556	57.6253
XAL110	OL 6	36.4079	0.0089	34.6642	0.6126	28.8298	0.2978	-0.0069	0.0032	100.817	59.7188
XAL110	OL 6	36.5308	-0.0137	34.7353	0.6766	28.6061	0.3045	0.0151	0.0123	100.867	59.4821
XAL110	OL 6	35.7901	0.1653	35.1423	0.6738	27.0618	0.3217	-0.0062	-0.0033	99.1454	57.8539
XAL110	OL 6	36.648	0.0069	33.0479	0.5861	29.7954	0.3046	0.0074	-0.0158	100.38	61.6439
XAL110	OL 6	36.7937	0.025	32.7807	0.6439	30.0104	0.284	0.0061	0.0188	100.563	62.0051
XAL110	OL 6	36.5148	0.0452	33.0417	0.5836	29.8627	0.2787	0.0031	0.014	100.344	61.7017
XAL110	OL 6	37.3801	1.03	32.5021	0.5297	28.0732	0.7529	-0.0066	0.0283	100.29	60.6249
XAL110	OL 6	36.1769	0.1816	34.9621	0.6324	27.4276	0.3143	-0.0053	0.029	99.7186	58.3061
XAL110	OL 6	36.0721	0.0225	36.8061	0.6664	26.7071	0.3226	0.003	-0.0107	100.589	56.3978
XAL110	OL 7	37.5132	0.0101	30.0494	0.5243	32.6081	0.1989	-0.0125	-0.0094	100.882	65.9212
XAL110	OL 7	37.6105	0.021	29.428	0.4886	33.0883	0.1676	0.0085	0.0045	100.817	66.7144
XAL110	OL 7	37.727	0.0311	29.3647	0.415	33.2519	0.1622	-0.0077	0.0366	100.981	66.8714
XAL110	OL 7	37.5695	0.0299	29.4053	0.4488	33.0686	0.1633	-0.0015	0.0264	100.71	66.7183
XAL110	OL 7	37.6009	0.0016	29.6908	0.3853	32.8655	0.183	0.0103	0.0133	100.751	66.3661
XAL110	OL 7	36.9236	0.2874	29.8166	0.5251	31.3127	0.2324	-0.0031	0.0025	99.0971	65.1812
XAL110	OL 7	37.3805	0.042	30.6702	0.536	31.8515	0.2521	0.005	0.0044	100.742	64.9276
XAL110	OL 7	37.1878	0.0319	31.1824	0.5666	31.552	0.298	0.0125	-0.0151	100.816	64.3331
XAL110	OL 7	36.8333	0.0169	32.7165	0.5612	29.9795	0.3112	0.0062	-0.0032	100.421	62.027
XAL110	OL 8	37.0705	0.0291	31.8226	0.5992	31.1053	0.2558	0.003	0.0187	100.904	63.5357
XAL110	OL 8	37.6657	0.5376	30.8454	0.4524	30.1765	0.2964	-0.0022	0.0059	99.9778	63.556
XAL110	OL 8	37.1638	0.0335	31.5434	0.598	31.2264	0.2717	-0.0023	-0.0172	100.817	63.8294
XAL110	OL 8	37.2961	0.0363	31.3262	0.5646	31.394	0.2538	0.0117	0.0059	100.889	64.112
XAL110	OL 8	36.979	0.0213	32.905	0.5659	30.0419	0.2747	0.0015	-0.001	100.788	61.9408
XAL110	OL 8	37.1246	0.0149	32.6276	0.579	30.3917	0.2566	-0.0068	0.0042	100.992	62.4121
XAL110	OL 8	37.4348	0.0218	30.8031	0.5319	31.8051	0.2485	-0.0114	0.0057	100.839	64.7959
XAL110	OL 8	37.3116	0.0093	31.3122	0.6003	31.456	0.259	-0.005	-0.0088	100.934	64.1676
XAL110	OL 8	36.7349	-0.0012	34.4107	0.5623	28.8718	0.2814	0.0075	0.0115	100.879	59.9303
XAL110	OL 8	37.2577	0.0306	32.591	0.5506	30.1992	0.3252	0.0006	0.0047	100.96	62.2891
XAL110	OL 8	37.3844	0.0194	31.0918	0.4576	31.6421	0.2846	-0.0087	0.0192	100.89	64.465
XAL110	OL 8	37.253	0.0271	30.8703	0.5645	31.9674	0.2488	-0.001	0.0059	100.936	64.8621
XAL110	OL 8	37.3019	0.0238	30.7966	0.4909	31.8012	0.2569	0.0075	-0.003	100.676	64.7977
XAL110	OL 8	37.2856	0.0335	31.252	0.5687	31.2165	0.2732	0.0071	0.0056	100.642	64.036
XAL110	OL 8	37.3088	-0.0109	31.2794	0.4949	31.401	0.267	0.0063	0.0131	100.76	64.1514
XAL110	OL 8	37.5757	0.0077	30.3714	0.5197	32.2895	0.224	-0.0123	0.0133	100.989	65.4598
XAL110	OL 8	37.3429	0.0016	30.7558	0.4698	31.9988	0.2509	-0.0055	0.0138	100.828	64.9691
XAL110	OL 8	36.1488	0.2766	35.968	0.6796	26.6862	0.3493	-0.0086	0.0076	100.108	56.9442
XAL110	OL 9	37.5372	0.1076	29.8133	0.5932	31.7619	0.2514	-0.0049	0.0106	100.07	65.5065
XAL110	OL 10	37.6221	0.0242	30.2218	0.5047	32.2724	0.2591	-0.0084	-0.0128	100.883	65.5592
XAL110	OL 10	37.5205	0.0081	29.9923	0.5028	32.6374	0.2428	-0.0003	0.0244	100.928	65.9842
XAL110	OL 10	37.6267	0.017	29.8313	0.4306	32.5737	0.2194	0.0033	0.0014	100.703	66.0609
XAL110	OL 10	37.4329	0.0162	29.9137	0.5936	32.6846	0.1956	0.0083	0.0271	100.872	66.0754
XAL110	OL 10	37.4865	0.0299	29.8063	0.5011	32.5218	0.19	0	-0.0085	100.527	66.044
XAL110	OL 10	37.4601	0.0287	29.9895	0.4814	32.598	0.1937	0.0032	-0.0073	100.747	65.959
XAL110	OL 10	37.4043	0.0234	30.3358	0.4333	32.4377	0.2125	0.0012	0.009	100.857	65.5895
XAL110	OL 10	37.4776	0.0267	30.3535	0.5651	32.3399	0.2256	0.0034	-0.001	100.991	65.5083
XAL110	OL 10	37.3622	-0.0028	30.6893	0.4666	32.0428	0.2467	-0.0239	0.031	100.812	65.0498
XAL110	OL 10	36.6906	-0.0133	34.1852	0.5483	29.0148	0.2966	-0.0023	0.0142	100.734	60.2066
XAL110	OL 11	37.3761	0	30.4287	0.544	32.1449	0.2529	0.0042	0.0012	100.752	65.3153
XAL110	OL 11	37.2041	0.017	30.8051	0.5708	31.9409	0.2248	0.0003	0.0039	100.767	64.8915
XAL110	OL 11	37.2485	0.0137	30.8213	0.5129	31.7959	0.2423	-0.0046	0.0043	100.634	64.7759
XAL110	OL 11	37.0584	0.0456	30.9421	0.4682	31.3383	0.2767	-0.0004	-0.0231	100.106	64.3546
XAL110	OL 11	37.1934	0.0182	31.4296	0.4996	31.4108	0.2727	-0.0036	0.0028	100.824	64.0483
XAL110	OL 11	37.3208	0.0384	30.2819	0.5023	32.0769	0.2786	0.0101	0.0066	100.515	65.3769
XAL110	OL 11	37.4423	0.0399	30.5938	0.4838	31.7762	0.2364	-0.0098	0.0147	100.577	64.9305
XAL110	OL 12	37.5367	0.0166	30.4431	0.4828	32.1169	0.2399	-0.0013	0.0019	100.836	65.285
XAL110	OL 12	37.387	0.0109	30.1945	0.5584	32.498	0.2181	-0.0111	0.006	100.862	65.7366
XAL110	OL 12	37.4343	0.0202	29.9728	0.5628	32.7306	0.1873	0.0108	0.0152	100.934	66.0625
XAL110	OL 12	37.5795	0.0166	29.7186	0.5297	32.9196	0.1618	-0.0001	-0.0112	100.915	66.3818
XAL110	OL 12	37.6518	0.0242	29.6987	0.455	32.6905	0.1507	0.0046	0.0006	100.676	66.241
XAL110	OL 12	37.6535	0.0174	29.6937	0.4292	32.5393	0.1779	-0.0019	-0.0089	100.5	66.1409
XAL110	OL 12	37.4796	0.0194	30.0631	0.4333	32.542	0.1935	-0.0016	-0.0092	100.72	65.8653
XAL110	OL 12	37.3006	-0.0028	30.5774	0.495	31.9727	0.2399	0.0045	0.0173	100.605	65.0829
XAL110	OL 12	37.1081	0.0198	31.703	0.5623	31.0224	0.3077	0.0044	0.0147	100.742	63.5609
XAL110	OL 13	37.313	0.0359	30.9165	0.5746	31.3223	0.2931	0.0027	-0.0133	100.445	64.3619
XAL110	OL 13	37.3984	0.0258	29.9818	0.5148	32.2146	0.2428	0.0015	0.0171	100.397	65.6985
XAL110	OL 13	37.3795	0.0218	29.9743	0.5649	32.2297	0.2084	0.01	-0.0001	100.388	65.7149
XAL110	OL 13	37.7681	0.0174	29.7128	0.4104	32.8668	0.1759	0.0137	-0.0142	100.951	66.3504
XAL110	OL 13	37.7733	-0.0093	29.4509	0.4619	32.9849	0.1908	0.0077	0.0189	100.879	66.6276
XAL110	OL 13	37.7089	0.0182	29.3187	0.4791	33.2585	0.174	-0.0045	0.0231	100.976	66.9107
XAL110	OL 13	37.3212	0.095	28.9882	0.5043	32.8166	0.1866	-0.0045	0.032	99.9393	66.8656
XAL110	OL 13	37.5822	0.0158	29.3858	0.5301	33.2699	0.1817	0.0037	0.017	100.986	66.8677
XAL110	OL 13	37.3121	0.0044	31.0567	0.5379	31.5809	0.2464	0.0004	0.0036	100.743	64.4466
XAL110	OL 14	37.0118	0.1712	30.9928	0.5266	30.5431	0.2737	0.0025	0.0001	99.5218	63.7249
XAL110	OL 14	37.8964	0.0133	29.2165	0.4177	32.8441	0.201	-0.0066	0.0015	100.584	66.7102
XAL110	OL 14	37.7611	0.0222	28.9024	0.436	33.3293	0.1482	-0.0109	0.0364	100.625	67.2733
XAL110	OL 14	37.5017	0.0425	29.3042	0.4693	32.9965	0.1685	-0.0051	0.0324	100.51	66.7465
XAL110	OL 14	37.4598	0.0194	30.6264	0.5118	32.0957	0.2467	-0.0038	-0.0029	100.953	65.1338
XAL110	OL 15	37.3338	0.0254	31.2113	0.5504	30.7591	0.2668	-0.0005	0.0238	100.17	63.7253
XAL110	OL 15	37.3097	0.081	31.1	0.651	31.0043	0.2684	-0.0054	0.0169	100.426	63.9913
XAL110	OL 15	36.2107	0.3672	37.6191	0.7444	25.3372	0.3674	-0.0163	0.0139	100.644	54.5578
XAL110	OL 16	37.1874	-0.0008	31.5273	0.5693	30.7299	0.2614	-0.0001	0.0236	100.298	63.4703
XAL110	OL 16	37.6942	0.0012	29.3622	0.4791	32.311	0.1947	-0.0031	0.0205	100.06	66.2345
XAL110	OL 16	37.4896	0.019	28.88	0.5209	33.2591	0.1593	0.0152	0.0112	100.354	67.244
XAL110	OL 16	37.783	0.0247	29.0305	0.5362	33.3955	0.1595	0.0118	0.018	100.959	67.2196
XAL110	OL 16	37.751	0.0093	29.0984	0.4874	33.114	0.1848	0.0065	0.0435	100.695	66.9814
XAL110	OL 16	37.6062	0.0311	29.6034	0.4588	32.6794	0.1935	-0.0115	-0.0195	100.541	66.3052
XAL110	OL 16	37.2468	0.0133	30.4887	0.4975	31.9205	0.2368	-0.0049	0.022	100.421	65.1117
XAL110	OL 17	36.8774	0.027	32.0858	0.5536	30.5744	0.2482	0.0086	0.0189	100.394	62.9438
XAL110	OL 17	37.4683	0.0085	29.8994	0.5416	32.4141	0.207	0.0004	-0.0197	100.52	65.8997
XAL110	OL 17	37.5072	0.0138	29.3985	0.4135	33.0071	0.1691	0.0002	0.0155	100.525	66.682
XAL110	OL 17	37.684	0.0214	29.2254	0.43	33.1803	0.1586	-0.0024	0.0014	100.699	66.9291
XAL110	OL 17	37.7822	0.0263	28.9254	0.493	33.3804	0.1605	0.0016	0.022	100.791	67.2895
XAL110	OL 17	37.5432	0.0138	28.9234	0.4651	33.3059	0.1426	0.015	0.0203	100.429	67.242
XAL110	OL 17	37.5652	0.0336	29.0943	0.5621	33.1737	0.1649	0.0102	0.035	100.639	67.0244
XAL110	OL 17	37.6545	0.0158	29.699	0.4447	32.8193	0.1625	0.0117	0.017	100.824	66.3286
XAL110	OL 17	37.5304	0.0053	29.8126	0.4112	32.4773	0.1821	-0.0045	0.0274	100.442	66.0086
XAL110	OL 17	37.4823	0.0065	30.3916	0.5617	32.2231	0.1975	0.0048	-0.0035	100.864	65.3982
XAL110	OL 17	37.3524	0.0214	30.6601	0.4479	31.7234	0.2281	0.0027	-0.0061	100.43	64.8433
XAL110	OL 17	36.9091	0.0077	31.2221	0.649	31.2491	0.2539	0.0084	-0.0112	100.288	64.0821
XAL110	OL 17	36.7477	0.0266	33.108	0.5782	29.8248	0.2753	0.0004	0.0264	100.587	61.6243
XAL110	OL 17	36.3129	0.5378	37.2169	0.7092	25.229	0.4359	0.0085	0.0149	100.465	54.7184
XAL110	OL 17	35.7237	0.0217	38.1461	0.7872	25.1155	0.386	-0.0002	-0.0019	100.178	53.9945
XAL110	OL 17	35.7513	0.0181	38.7875	0.7239	25.1048	0.3686	-0.0019	-0.0108	100.741	53.5695
XAL110	OL 18	37.1295	0.0669	30.6765	0.5696	31.2191	0.3223	0.0033	0.0271	100.014	64.4648
XAL110	OL 18	37.3384	0.0355	30.5009	0.5182	31.9566	0.2445	-0.0048	0.0173	100.606	65.1283
XAL110	OL 18	37.3188	0.0307	30.4313	0.4225	32.0732	0.2313	-0.0025	0.0031	100.508	65.2628
XAL110	OL 18	37.4238	0.015	30.3958	0.4275	32.3289	0.1992	0.0122	0.0073	100.81	65.4692
XAL110	OL 18	37.4217	0.0351	30.2977	0.6261	32.2906	0.1956	0.0067	0.0232	100.897	65.5152
XAL110	OL 18	37.5203	0.0117	30.4331	0.472	32.1733	0.2201	0.0035	0.0041	100.838	65.3321
XAL110	OL 18	37.6113	0.0161	30.314	0.5666	32.1064	0.2679	-0.0032	0.0026	100.882	65.3738
XAL110	OL 18	37.3994	0.0044	30.5555	0.5642	32.0643	0.245	0.0067	0.0139	100.853	65.1641
XAL110	OL 18	37.4683	0.0339	30.4743	0.5126	32.1082	0.1996	0.0025	0.012	100.811	65.2554
XAL110	OL 18	37.299	0.0186	30.4129	0.5294	32.1927	0.1941	-0.0007	0.0158	100.662	65.3608
XAL110	OL 18	37.2174	0.0081	31.7956	0.5562	30.977	0.2469	-0.0064	0.0061	100.801	63.4596
XAL110	OL 18	37.1067	0.0157	31.2026	0.5381	31.1968	0.2834	0.0053	0.0386	100.387	64.0579
XAL110	OL 18	37.2139	0.0129	31.7637	0.5375	30.8667	0.2802	-0.0167	-0.0238	100.634	63.4001
XAL110	OL 18	37.2176	0	31.1892	0.5515	31.4317	0.28	-0.0014	0.0111	100.68	64.2402
XAL110	OL 19	36.313	0.0153	34.5693	0.7081	28.2526	0.3337	0.0174	0.0023	100.212	59.2977
XAL110	OL 19	37.19	-0.0024	31.9422	0.5683	30.8366	0.2745	0.005	0.0123	100.826	63.2472
XAL110	OL 19	36.9783	0.0871	32.0282	0.6364	30.6437	0.3016	-0.0023	-0.0126	100.66	63.0387
XAL110	OL 19	37.7111	0.298	30.7283	0.5808	30.4902	0.3409	-0.0084	-0.0025	100.138	63.883
XAL110	OL 19	37.2824	0.0287	31.1276	0.4591	31.4028	0.2821	-0.0083	0.0112	100.586	64.2647
XAL110	OL 19	37.0049	0.0153	31.5741	0.5587	31.0865	0.2832	0.0076	0.0048	100.535	63.703
XAL110	OL 19	36.9286	0.0299	32.9545	0.5927	30.1582	0.3045	-0.0121	0.0067	100.963	61.9963
XAL110	OL 20	37.3649	0.0259	29.9834	0.5565	32.3208	0.2198	0.0078	0.0085	100.488	65.7717
XAL110	OL 20	37.6686	-0.0109	29.1584	0.5086	33.1129	0.181	0.0107	0.0065	100.636	66.935
XAL110	OL 20	37.7801	0.0045	28.7324	0.4473	33.6033	0.1727	-0.002	0.0032	100.742	67.5829
XAL110	OL 20	37.8885	0.0178	28.3421	0.4217	33.8165	0.1625	0.0065	0.0046	100.66	68.0193
XAL110	OL 20	37.7405	0.004	28.5382	0.4611	33.6975	0.1732	-0.0004	0.0078	100.622	67.7923
XAL110	OL 20	37.7494	0.0267	29.0067	0.4796	33.1152	0.1936	0.0023	0.0091	100.583	67.0518
XAL110	OL 20	37.7243	-0.0044	29.6079	0.508	32.659	0.2356	0.0093	0.0308	100.77	66.2877
XAL110	OL 20	37.7638	0.0234	28.7285	0.4596	33.3545	0.1912	0.0138	0.0008	100.536	67.4228
XAL110	OL 20	39.69	0.1596	27.4441	0.4155	31.6109	0.2816	0.0023	0.0229	99.6268	67.2478
XAL110	OL 20	37.8149	0.0016	28.7662	0.4883	33.5632	0.2119	0.0081	0.008	100.862	67.5309
XAL110	OL 20	37.7672	0.023	28.5846	0.371	33.6082	0.2236	0.0092	0.0008	100.588	67.699
XAL110	OL 20	37.646	0.0202	30.0856	0.5021	32.481	0.2404	-0.0149	0.0209	100.981	65.8063
XAL110	OL 20	37.1603	0.0186	30.8018	0.6145	31.6544	0.2387	0.0109	0.0052	100.504	64.6885
XAL110	OL 21	36.8489	0.046	31.3354	0.6093	30.8534	0.2987	-0.0017	0.0028	99.9927	63.7045
XAL110	OL 21	35.9275	0.0486	35.9982	0.6157	26.72	0.5499	-0.0112	-0.0083	99.8404	56.9549
XAL110	OL 21	36.9686	0.004	31.6408	0.6037	30.9944	0.2756	-0.0033	0.0024	100.486	63.5857
XAL110	OL 21	35.7344	0.1141	37.349	0.762	25.8682	0.2622	0.0061	-0.0038	100.092	55.2499
XAL110	OL 21	36.9475	0.0081	31.9351	0.5798	30.7259	0.2876	0.0002	-0.0286	100.455	63.1688
XAL110	OL 21	37.0515	0.0173	32.5899	0.5695	30.2618	0.2625	-0.0077	0.0121	100.757	62.3387
XAL110	OL 21	37.0972	0.0287	31.1923	0.482	31.1445	0.2762	-0.0065	0.0058	100.22	64.0268
XAL110	OL 21	37.0565	0.0032	33.0591	0.6094	29.9776	0.2662	-0.0038	0.0193	100.988	61.78
XAL110	OL 21	37.1209	0.017	31.3887	0.4387	31.3109	0.2882	0.0057	0.0277	100.598	64.005
XAL110	OL 21	37.2335	0.0218	30.8781	0.5187	31.4445	0.2716	0.0097	0.0171	100.395	64.4796
XAL110	OL 21	37.2766	0.0004	31.3707	0.5239	31.3555	0.2776	-0.0001	0.006	100.811	64.051
XAL110	OL 21	36.9	0.0222	32.2613	0.5142	30.5748	0.2804	0.0081	0.0319	100.593	62.817
XAL110	OL 21	37.2957	0.0214	31.8816	0.4745	30.8353	0.2806	0.0024	-0.0031	100.788	63.2903
XAL110	OL 21	37.2405	0.0089	30.9073	0.5226	31.517	0.2709	-0.0084	-0.016	100.443	64.5108
XAL110	OL 22	36.4901	0.0153	34.3273	0.4951	28.2811	0.3624	-0.0013	-0.0249	99.9452	59.4914
XAL110	OL 22	36.4845	0.0334	33.5886	0.6638	28.9671	0.3179	0.0035	-0.0035	100.055	60.5882
XAL110	OL 22	36.666	0.0206	32.9562	0.6336	29.9703	0.3	-0.0038	0.0044	100.547	61.8477
XAL110	OL 22	36.7344	0	33.2359	0.633	29.4615	0.3004	-0.0082	-0.0039	100.353	61.2425
XAL110	OL 22	36.6038	0.0841	33.3841	0.6323	29.0422	0.3199	0.0003	0.001	100.068	60.7956
XAL110	OL 22	36.8668	0.0085	32.7505	0.5237	30.142	0.3202	-0.0067	0.006	100.611	62.1299
XAL110	OL 22	37.0292	0.0137	32.0013	0.6313	30.9447	0.2758	0.0055	0.0099	100.912	63.2856
XAL110	OL 22	37.0556	0.0198	31.8156	0.5492	30.8335	0.2813	-0.0052	0.0042	100.554	63.3371
XAL110	OL 22	37.1788	0.0145	32.0339	0.5289	30.5937	0.2939	0.0059	0.0145	100.664	62.9966
XAL110	OL 22	36.8482	0.0189	32.4707	0.5673	30.0292	0.2901	0.0076	0.0222	100.254	62.2435
XAL110	OL 22	37.2449	0.0291	30.5422	0.4676	32.0262	0.2179	0.0051	0.0059	100.539	65.1471
XAL110	OL 22	37.2573	0.0331	30.7055	0.4973	31.6606	0.249	0.005	0.0111	100.419	64.7642
XAL110	OL 22	36.3646	0.0221	35.2903	0.7602	28.0799	0.3419	-0.0028	0.0313	100.888	58.6498
XAL110	OL 23	37.5309	0.0162	29.8772	0.5814	32.4388	0.231	-0.007	0.0113	100.68	65.9332
XAL110	OL 23	37.8332	0.0061	29.1083	0.3979	33.1914	0.1804	0.0015	0.029	100.748	67.0254
XAL110	OL 24	37.3501	0.0117	30.5027	0.5132	31.9965	0.2418	-0.0049	0.0403	100.651	65.1555
XAL110	OL 24	37.7006	0.0202	29.2402	0.5486	32.5241	0.1917	0.0067	-0.0016	100.23	66.4742
XAL110	OL 24	37.5535	0.038	29.058	0.462	33.1521	0.1926	0.0161	-0.0032	100.469	67.0372
XAL110	OL 24	37.5835	0.0016	30.1134	0.5787	32.2909	0.2591	-0.0016	0.0148	100.84	65.6532
XAL110	OL 24	36.9012	0.0161	31.9601	0.61	30.3839	0.3046	0.0075	-0.0085	100.175	62.8897
XAL110	OL 25	36.2797	0.0306	36.0413	0.7184	27.1818	0.3002	-0.0001	0.0082	100.56	57.3452
XAL110	OL 25	36.6199	0.0442	34.8209	0.6705	28.1196	0.3338	0.0125	0.0175	100.639	59.0085
XAL110	OL 25	37.2696	0.0044	31.3706	0.492	31.178	0.2804	0.0165	0.0003	100.612	63.9204
XAL110	OL 25	37.5768	0.0113	30.4648	0.535	32.1642	0.2004	-0.0055	0.0241	100.971	65.3022
XAL110	OL 25	37.4388	0.0238	29.89	0.5431	31.9694	0.1908	0.0045	0.0287	100.089	65.5954
XAL110	OL 25	37.5401	0.0133	30.1807	0.4337	31.9874	0.2544	-0.0062	0.0235	100.427	65.3893
XAL110	OL 25	37.4424	0.0081	30.9279	0.4424	31.5928	0.2848	-0.0025	0.0136	100.71	64.5505
XAL110	OL 25	37.4421	0.0335	30.5564	0.4403	32.0687	0.2506	-0.0008	0.0137	100.805	65.1667
XAL110	OL 25	37.6053	0.0125	30.565	0.4977	32.0235	0.2109	0.0005	0.0205	100.936	65.1281
XAL110	OL 25	37.4934	-0.0036	30.7966	0.5009	31.9061	0.2328	0.0022	0.016	100.945	64.8729
XAL110	OL 25	37.3307	0.0323	31.2216	0.5239	31.3831	0.276	0.003	0.0054	100.776	64.181
XAL110	OL 25	37.346	0.0133	31.5157	0.5089	31.0624	0.3188	-0.0147	0.0187	100.769	63.7279
XAL110	OL 26	36.3526	0.2242	35.5764	0.5947	27.2892	0.327	-0.0087	-0.001	100.354	57.7586
XAL110	OL 26	37.271	0.0178	30.9271	0.516	31.5876	0.255	0.0105	0.0172	100.602	64.5474
XAL110	OL 26	37.5378	0.0347	30.6635	0.5181	32.0041	0.2174	-0.0113	0.0157	100.98	65.0413
XAL110	OL 26	37.2687	0.0343	30.9166	0.5498	31.7666	0.2356	0.0056	0.0216	100.799	64.6841
XAL110	OL 26	37.1993	0.0012	31.3226	0.4988	31.381	0.2776	0.0005	-0.0112	100.67	64.1049
XAL110	OL 26	37.1604	0.0254	31.7037	0.5601	30.8049	0.2505	-0.0155	0.012	100.501	63.3974
XAL110	OL 26	37.509	0.0238	31.0912	0.5653	31.2044	0.2743	0.0049	-0.0065	100.666	64.146
XAL110	OL 26	37.9566	0.1142	30.5419	0.4616	30.7666	0.288	0.0092	0.0152	100.153	64.2307
XAL110	OL 26	37.4119	-0.0044	31.1678	0.4789	31.5409	0.2518	-0.0006	0.0037	100.85	64.3356
XAL110	OL 26	36.505	0.0073	34.4783	0.7287	28.7526	0.3235	0.0121	-0.0033	100.804	59.7838
XAL110	OL 26	37.4372	0.0371	31.146	0.4864	31.4259	0.2643	0.0068	0.0307	100.835	64.2678
XAL110	OL 26	37.3118	0.023	31.2843	0.5105	31.3679	0.2898	0.0177	0.0122	100.817	64.1235
XAL110	OL 26	37.3712	0.0258	31.0571	0.5153	30.8505	0.3829	-0.0065	0.002	100.198	63.9084
XAL110	OL 26	37.1177	0.0266	32.8263	0.501	29.7652	0.3052	-0.0011	0.0058	100.547	61.7789
XAL110	OL 26	36.9484	0.0161	32.4018	0.5496	30.2813	0.2782	0.0034	-0.0023	100.477	62.4895
XAL110	OL 27	36.9476	0.0202	31.7807	0.5742	30.9629	0.2825	0.0067	-0.0021	100.573	63.4598
XAL110	OL 27	37.3746	0.275	30.8409	0.5039	30.6967	0.2979	0.0033	-0.026	99.9663	63.9542
XAL110	OL 27	37.046	-0.0012	31.3386	0.573	31.2288	0.2715	0.0094	-0.0136	100.452	63.9814
XAL110	OL 27	37.2958	0.0081	31.6187	0.6379	31.0415	0.285	-0.0008	0.0032	100.889	63.6369
XAL110	OL 27	37.063	0.0182	31.9528	0.5807	30.6857	0.2975	0.0056	0.0244	100.628	63.1253
XAL110	OL 27	36.3719	0.0088	35.8661	0.745	27.2752	0.3138	-0.0011	0.0172	100.597	57.548
XAL110	OL 27	36.1861	0.302	35.177	0.595	26.472	0.3795	0.0047	-0.0077	99.1085	57.2917
XAL110	OL 27	35.7035	0.0113	38.5448	0.7405	25.3436	0.264	0.002	-0.0049	100.605	53.9609
XAL110	OL 27	36.2692	0.0141	34.874	0.68	28.4642	0.2991	0.0176	0.0111	100.629	59.266
XAL110	OL 27	36.5066	0.0193	35.356	0.6364	28.051	0.3239	-0.0141	0.031	100.91	58.5797
XAL110	OL 27	37.036	0.0178	31.5547	0.5717	30.9995	0.3009	-0.0051	0.0052	100.481	63.6524
XAL110	OL 27	36.083	0.0401	37.7978	0.646	25.5314	0.3509	0.0071	-0.0053	100.451	54.6297
XAL110	OL 28	35.8775	0.0201	37.2385	0.7231	25.9739	0.3537	0.0053	0.0236	100.216	55.424
XAL110	OL 28	36.8671	0.0262	33.3781	0.5924	29.3331	0.3013	0.0137	0.0021	100.514	61.0373
XAL110	OL 28	36.8914	0.0205	33.5149	0.5755	29.0463	0.3048	0.0023	-0.01	100.346	60.7058
XAL110	OL 28	37.0723	0.0399	31.9654	0.5795	30.674	0.2519	-0.0061	0.0157	100.593	63.1073
XAL110	OL 28	37.0502	0.0165	32.436	0.5957	30.154	0.2701	0.0031	0.0113	100.537	62.366
XAL110	OL 28	36.9551	0.0201	32.7472	0.542	29.9514	0.2958	0.0121	0.0084	100.532	61.9829
XAL110	OL 28	36.6392	0.0056	33.9978	0.5422	28.7747	0.3178	0.0043	0.013	100.295	60.1391
XAL110	OL 28	37.4941	0.0238	30.3571	0.5529	32.1123	0.2309	-0.0049	0.004	100.77	65.3458
XAL110	OL 29	37.7005	0.2531	30.2951	0.4263	31.188	0.2974	-0.014	-0.0204	100.126	64.7281
XAL110	OL 29	37.6742	0.0214	30.5058	0.579	31.9198	0.2448	0.0039	0.0277	100.977	65.0985
XAL110	OL 29	37.5063	0.021	30.4225	0.3925	32.0109	0.2355	0.0171	-0.003	100.603	65.2253
XAL110	OL 29	37.4889	0.0169	30.5266	0.5345	31.867	0.2494	-0.0044	0.001	100.68	65.0454
XAL110	OL 29	37.4492	-0.004	30.5245	0.5193	31.7353	0.2547	0.0162	-0.0147	100.481	64.9528
XAL110	OL 29	37.5928	0.0226	30.4451	0.4969	31.8745	0.2688	0.003	-0.0047	100.699	65.1116
XAL110	OL 29	37.2973	0.0279	30.3991	0.5305	31.7487	0.2545	-0.0061	-0.0026	100.249	65.0561
XAL110	OL 29	37.6638	0.0299	30	0.4787	32.1815	0.2609	-0.0069	-0.0157	100.592	65.6618
XAL110	OL 29	37.6464	0.0161	29.8171	0.5323	32.4095	0.2525	0.0027	0.0102	100.687	65.9583
XAL110	OL 29	37.842	0.0275	29.3597	0.396	32.9966	0.2568	-0.0084	0.008	100.878	66.7044
XAL110	OL 29	37.6234	0.0117	28.8307	0.3973	33.2761	0.1942	0.0095	0.0003	100.343	67.2929
XAL110	OL 29	37.8587	0.0283	29.2681	0.4646	32.8549	0.2138	0.0008	0.0148	100.704	66.6783
XAL110	OL 29	37.7335	0.0226	28.6576	0.5153	33.2534	0.1943	0.0013	0.0106	100.389	67.4103
XAL110	OL 29	37.7217	0.0141	28.987	0.4517	33.1452	0.197	-0.0085	0.0189	100.527	67.0867
XAL110	OL 29	37.571	0.0141	29.9249	0.3595	32.5031	0.1996	0.0041	-0.0082	100.568	65.9421
XAL110	OL 29	37.1264	0.3625	30.6004	0.5361	30.4708	0.2763	-0.0035	0.0331	99.4021	63.9645
XAL110	OL 29	37.3718	0.0331	31.0109	0.5782	31.6418	0.2587	0.0078	0.0108	100.913	64.5247
XAL110	OL 29	37.9422	0.0073	28.5006	0.5375	33.6686	0.2081	-0.0077	0.0041	100.861	67.8024
XAL110	OL 29	37.5432	0.0101	29.048	0.5626	33.1929	0.2173	-0.0035	0.0085	100.579	67.0723
XAL110	OL 29	37.4286	0.0234	30.4436	0.572	31.6525	0.2419	0.0072	-0.0076	100.362	64.9536
XAL110	OL 29	37.221	0.029	32.1419	0.5292	30.5494	0.2644	-0.0151	0.0166	100.736	62.8841
XAL110	OL 29	37.2205	0.0093	31.6283	0.5214	30.824	0.2499	-0.0014	0.0079	100.46	63.4671
XAL110	OL 30	36.2537	-0.002	36.8098	0.6963	26.7121	0.3134	-0.0003	0.0166	100.799	56.4003
XAL110	OL 30	36.2805	0.0201	36.7053	0.7494	26.9051	0.3173	0.0147	-0.0051	100.987	56.6467
XAL110	OL 30	36.6582	0.0201	34.6986	0.6672	28.595	0.3111	-0.0147	0.0102	100.946	59.4979
XAL110	OL 30	36.483	0.0169	34.0353	0.6759	29.0719	0.2859	0.0045	-0.0093	100.564	60.3587
XAL110	OL 30	37.2277	0.0004	31.686	0.5885	31.1665	0.2716	0.0032	0.0068	100.951	63.6806
XAL110	OL 30	37.3172	0.0198	30.8534	0.5703	31.8034	0.2609	0.0042	-0.005	100.824	64.7573
XAL110	OL 30	37.6041	0.0271	30.7236	0.4436	31.8257	0.227	0.0058	0.0266	100.884	64.8694
XAL110	OL 30	36.7374	0.0201	34.2783	0.6673	28.9627	0.2807	0.007	0.0035	100.957	60.0982
XAL110	OL 30	37.2452	0.0109	31.3126	0.4723	31.356	0.2495	0.0019	0.0233	100.672	64.0942
XAL110	OL 30	37.1647	0.017	31.5495	0.5328	31.0122	0.2704	0.0047	-0.0245	100.527	63.6657
XAL110	OL 31	37.5338	0.0375	30.0756	0.4271	32.0635	0.2203	0.0082	0.0173	100.383	65.5221
XAL110	OL 31	37.6522	0.0218	29.2734	0.4294	32.9883	0.2008	0.0157	0.046	100.628	66.7642
XAL110	OL 31	37.9276	0.0113	29.0337	0.4086	33.3393	0.1577	-0.0021	0.0008	100.877	67.1802
XAL110	OL 31	37.8924	-0.0093	27.6085	0.4487	34.2909	0.1262	-0.0022	0.0405	100.396	68.8865
XAL110	OL 31	38.0641	0.017	27.4727	0.3702	34.6983	0.1392	-0.0143	0.0348	100.782	69.2443
XAL110	OL 31	38.0255	0.0012	27.4469	0.4068	34.5469	0.1529	0.0175	0.0221	100.62	69.1709
XAL110	OL 31	38.0246	0.0093	28.1632	0.4387	34.0698	0.1518	-0.0023	0.0261	100.881	68.3188
XAL110	OL 31	37.7985	0.0129	29.3583	0.4723	33.1597	0.1499	0.0023	0.029	100.983	66.8148
XAL110	OL 31	37.582	0.0283	30.2064	0.4907	32.3346	0.2164	-0.0063	0.0233	100.875	65.6143
XAL110	OL 32	36.94	0.2991	33.675	0.6505	28.2769	0.3304	-0.0028	0.0209	100.19	59.9492
XAL110	OL 32	37.1131	0.0299	31.522	0.4988	30.9538	0.2728	0.0037	-0.0009	100.393	63.6424
XAL110	OL 32	37.4787	0.025	30.59	0.4715	31.733	0.2342	0.0044	-0.0059	100.531	64.9023
XAL110	OL 32	37.5333	0.0372	29.8468	0.4788	32.6611	0.188	0.0006	0.0173	100.763	66.1094
XAL110	OL 32	37.4959	0.0089	29.4764	0.513	32.7303	0.1645	0.0088	-0.0098	100.388	66.4358
XAL110	OL 32	37.7166	0.0352	29.5504	0.4871	32.9901	0.1788	-0.0077	0.001	100.951	66.5562
XAL110	OL 32	37.4752	0.0053	30.2531	0.5198	32.4177	0.2104	-0.0133	0.0275	100.896	65.6373
XAL110	OL 32	37.4991	0.0178	30.5016	0.5578	31.9213	0.246	0.0056	-0.0029	100.746	65.1027
XAL110	OL 32	36.4805	0.2647	35.6801	0.5408	26.1318	0.3428	-0.0035	-0.0121	99.4251	56.6264
XAL110	OL 33	36.3818	0.0121	33.5847	0.6363	28.5654	0.2833	-0.0153	0.0423	99.4906	60.2571
XAL110	OL 33	37.2915	0.0161	30.9535	0.4893	31.3668	0.263	-0.0015	0.0354	100.414	64.3669
XAL110	OL 33	37.1929	0.0182	30.0213	0.4806	32.036	0.227	0.0043	0.0047	99.985	65.5434
XAL110	OL 33	37.5682	0.0263	29.9297	0.4776	32.4018	0.2117	0.0072	0.0319	100.654	65.8681
XAL110	OL 33	37.4749	0.0243	29.6301	0.4756	32.6926	0.1892	0.0143	0.0428	100.544	66.2939
XAL110	OL 33	37.4001	0.0259	29.1667	0.5334	32.9602	0.1725	-0.002	0.0069	100.264	66.8262
XAL110	OL 33	37.5295	0.0214	28.7626	0.4876	33.3942	0.1714	-0.0008	0.0135	100.379	67.4228
XAL110	OL 33	37.711	0.0117	28.7115	0.4801	33.5408	0.1657	-0.0063	0.0407	100.655	67.5578
XAL110	OL 33	37.7531	0.0198	28.3971	0.4272	33.7555	0.1806	-0.0066	0.0404	100.567	67.9379
XAL110	OL 33	37.7317	0.0105	28.4352	0.4739	33.775	0.2007	0.0031	0.0124	100.643	67.9214
XAL110	OL 33	37.5797	0.0461	28.4928	0.415	32.9059	0.215	0.0077	0.0188	99.6809	67.3063
XAL110	OL 33	37.7933	0.0307	28.7482	0.4422	33.5346	0.1965	-0.0094	-0.001	100.735	67.5258
XAL110	OL 33	37.741	0.0178	28.4547	0.4123	33.5269	0.1904	0.0271	0.0046	100.375	67.7456
XAL110	OL 33	37.4398	0.0227	28.9046	0.5946	33.2693	0.2109	0.0226	-0.004	100.46	67.2321
XAL110	OL 33	37.4592	0.0157	30.7023	0.5978	31.5751	0.2843	0.0075	0.0118	100.654	64.7049
XAL110	OL 33	37.4468	0.0198	30.4198	0.6276	31.8538	0.301	-0.0103	0.0178	100.676	65.1156
XAL110	OL 33	37.2908	0.0057	30.7184	0.5318	31.4736	0.2662	-0.0136	0.0254	100.298	64.6194
XAL110	OL 34	37.3328	0.0069	30.7519	0.5691	31.5589	0.2542	0.0065	-0.0051	100.475	64.6565
XAL110	OL 34	37.5212	0.0057	30.3929	0.4541	31.9669	0.2264	0.004	-0.0189	100.552	65.2163
XAL110	OL 34	37.5421	0.0367	30.4068	0.5345	31.8792	0.2217	-0.0002	-0.0107	100.61	65.1437
XAL110	OL 34	37.9109	-0.0028	28.8661	0.516	33.0629	0.2341	0.0111	0.0165	100.615	67.1242
XAL110	OL 35	37.0168	0.4683	32.8649	0.6169	28.4937	0.3772	0.0071	0.0168	99.8616	60.7149
XAL110	OL 35	37.182	0.0242	31.6897	0.4741	30.9038	0.3002	0.0103	0.0102	100.595	63.4821
XAL110	OL 35	37.3726	0.0218	31.3237	0.587	31.0394	0.298	-0.0151	0.0166	100.644	63.8519
XAL110	OL 35	37.7815	0.2509	30.8602	0.5931	30.5836	0.2709	0.013	0.0151	100.368	63.8547
XAL110	OL 35	37.4851	0.0311	30.7778	0.5519	31.6041	0.2451	-0.0118	0.005	100.688	64.6699
XAL110	OL 39	37.9642	0.036	28.7905	0.4378	33.5264	0.1989	0.0073	0.0048	100.966	67.4881
XAL110	OL 39	37.9264	0.0141	29.0488	0.4744	33.2047	0.1752	0.0017	0.019	100.864	67.0795
XAL110	OL 39	37.7019	0.0182	30.0822	0.5353	32.4066	0.2093	-0.0061	0.0132	100.961	65.7572
XAL110	OL 40	37.6736	0.019	29.694	0.4584	32.9087	0.1861	0.0068	0.011	100.958	66.393
XAL110	OL 41	37.2742	0.0153	30.9741	0.5618	31.5574	0.276	-0.0123	0.016	100.662	64.4905
XAL110	OL 41	37.5027	0.0267	30.1566	0.4715	32.6222	0.2287	-0.0109	-0.0158	100.982	65.8509
XAL110	OL 41	37.5527	0.0291	29.6456	0.3911	32.9956	0.2093	0.0125	0.0072	100.843	66.488
XAL110	OL 41	37.7106	0.0178	29.125	0.4167	33.2431	0.1884	0.0004	-0.0018	100.7	67.0471
XAL110	OL 41	37.8893	0.0178	28.4621	0.468	33.9129	0.1708	-0.0015	0.0106	100.93	67.9894
XAL110	OL 41	37.8079	0.0117	28.7105	0.4327	33.7615	0.1783	-0.0042	-0.0061	100.892	67.7024
XAL110	OL 42	37.6209	0.0085	28.4055	0.4473	34.1665	0.1563	0.015	0.0076	100.828	68.1945
XAL110	OL 42	37.5018	0.0146	28.8324	0.5676	33.7435	0.1635	-0.0067	-0.009	100.808	67.5979
XAL110	OL 42	37.4269	0.0117	29.2579	0.5045	33.4426	0.1836	0.0071	0.0118	100.846	67.0787
XAL110	OL 42	37.3973	0.0146	29.7935	0.4966	32.967	0.219	-0.0127	-0.0029	100.872	66.3578
XAL110	OL 42	37.4027	0.0186	29.8716	0.57	32.6576	0.21	0.0029	0.0168	100.75	66.0885
XAL110	OL 42	37.7763	0.204	30.1536	0.501	31.8154	0.2764	-0.0019	0.0125	100.737	65.2877
XAL110	OL 42	37.2148	0.2028	31.4972	0.4182	30.8654	0.3658	0.0058	0.0298	100.6	63.5944
XAL110	OL 42	36.8319	0.0218	32.0466	0.4867	30.5863	0.3066	0.0015	0.0238	100.305	62.9814
XAL110	OL 42	36.6358	0.0496	32.1193	0.5277	30.1849	0.307	-0.0037	-0.0025	99.8181	62.6199
XAL110	OL 43	37.8386	0.0283	28.7213	0.4946	33.3818	0.1699	-0.0021	-0.0123	100.62	67.4462
XAL110	OL 44	37.7429	0.0117	29.3892	0.502	33.0313	0.2209	0.0101	0.0234	100.931	66.7054
XAL110	OL 44	37.7854	0.0323	29.4892	0.4854	32.5131	0.2191	0.0024	0.0428	100.57	66.2774
XAL110	OL 44	37.3895	-0.004	30.0363	0.5365	32.6651	0.2054	-0.0026	0.0044	100.831	65.9703
XAL110	OL 45	36.8647	0.0989	34.1121	0.6473	28.4563	0.2711	0.0049	-0.0065	100.449	59.7913
XAL110	OL 45	36.7102	0.0388	31.6595	0.5752	30.9263	0.2713	-0.014	0.0085	100.176	63.521
XAL110	OL 45	37.4619	0.0202	30.5615	0.4765	31.8489	0.2479	-0.0004	-0.0165	100.6	65.0064
XAL110	OL 45	37.4888	0.0097	30.5428	0.4615	32.0113	0.2519	0.0086	0.013	100.788	65.1361
XAL110	OL 45	37.4936	0.0146	29.8077	0.5129	32.6482	0.2257	0.0049	0.0252	100.733	66.13
XAL110	OL 45	37.4295	0.0174	30.3793	0.585	31.9973	0.2711	0.0022	0.0167	100.698	65.248
XAL110	OL 45	37.5027	0.0174	30.3999	0.4716	32.1846	0.2774	0.0012	-0.0043	100.85	65.3648
XAL110	OL 45	37.0978	0.0158	31.5023	0.6379	31.1359	0.2649	-0.0062	0.0408	100.689	63.7925
XAL110	OL 46	37.3564	0.0351	31.0223	0.5344	31.6852	0.257	0.0012	-0.0017	100.89	64.5475
XAL110	OL 46	37.583	0.0328	29.8786	0.5436	32.5997	0.1908	0.0055	-0.0004	100.834	66.0433
XAL110	OL 46	37.5294	0.0081	29.1732	0.486	33.3647	0.1758	0.0073	0.01	100.755	67.0912
XAL110	OL 46	37.5304	-0.0032	28.8459	0.538	33.5128	0.1357	0.0098	-0.003	100.566	67.4371
XAL110	OL 46	37.7531	0.0081	29	0.4886	33.4681	0.1584	-0.0071	0.0254	100.894	67.2908
XAL110	OL 46	37.6559	0.0032	29.2192	0.5463	32.9765	0.1835	-0.0071	-0.0213	100.556	66.7975
XAL110	OL 46	37.5876	0.0715	29.7044	0.4489	32.3751	0.3029	0.0075	0.0067	100.505	66.0194
XAL110	OL 46	37.0683	0.023	31.6881	0.5402	30.6088	0.3578	0.0146	0.0221	100.323	63.2605
XAL110	OL 47	35.9584	0.0185	38.1198	0.7793	25.3783	0.3642	0.0015	-0.0133	100.607	54.2701
XAL110	OL 47	37.2189	0.0319	31.2122	0.5647	31.6142	0.2621	0.0063	-0.0083	100.902	64.3563
XAL110	OL 47	37.1739	0.0154	30.8177	0.5029	31.8737	0.2379	-0.0085	0.0328	100.646	64.834
XAL110	OL 47	37.3847	0.0117	30.7645	0.559	31.9048	0.2408	0.0175	0.0029	100.886	64.8958
XAL110	OL 47	37.4373	0.0303	30.9563	0.541	31.7104	0.2571	-0.0128	0.0189	100.939	64.6145
XAL110	OL 47	41.8109	7.326	26.5282	0.572	22.1116	2.2639	0.004	-0.0187	100.598	59.7715
XAL110	OL 47	36.6557	0.0117	33.7683	0.7174	29.427	0.2886	-0.0049	-0.0127	100.851	60.8366
XAL110	OL 47	36.3152	0.0197	35.0219	0.5475	28.176	0.3113	-0.0039	-0.0217	100.366	58.9177
XAL110	OL 47	35.9464	0.0173	37.696	0.813	26.0014	0.3218	0.0025	-0.0017	100.797	55.1481
XAL110	OL 47	36.2199	0.0346	36.6218	0.7081	26.6489	0.3005	-0.0034	-0.0032	100.527	56.4677
XAL110	OL 47	35.8492	0.0181	36.4186	0.659	26.7629	0.3262	0.0026	-0.0051	100.031	56.7093
XAL110	OL 48	37.099	-0.0048	31.5011	0.5614	31.1686	0.2846	-0.0017	0.0078	100.616	63.8176
XAL110	OL 48	37.2618	0.0113	31.0253	0.5045	31.7335	0.2619	-0.0093	-0.0048	100.784	64.5801
XAL110	OL 48	37.4781	0.0246	30.4743	0.3989	31.9944	0.2084	-0.0007	0.0076	100.586	65.1751
XAL110	OL 48	37.4147	0.0166	30.7	0.5546	31.8932	0.2094	0.016	0.0216	100.826	64.9352
XAL110	OL 48	37.2894	0.0178	30.9198	0.5939	31.7842	0.2304	0.01	0.0618	100.907	64.6945
XAL110	OL 48	37.3487	0.004	30.7364	0.5888	31.8127	0.2531	0.0018	0.0014	100.747	64.8507
XAL110	OL 48	37.2498	0.023	31.5193	0.4889	31.1361	0.267	-0.0014	0.017	100.7	63.7801
XAL110	OL 48	36.3033	0.0302	35.6227	0.6736	27.5325	0.2911	0.0166	0.0259	100.496	57.9433
XAL110	OL 49	37.6367	0.0117	29.0508	0.4547	33.1074	0.1989	-0.01	0.0313	100.481	67.0129
XAL110	OL 49	37.3423	0.0166	30.122	0.5224	32.0963	0.2385	-0.0008	0.0172	100.354	65.5102
XAL110	OL 50	37.6599	0.0113	29.421	0.4621	32.8915	0.1892	0.0009	0.0026	100.638	66.5872
XAL110	OL 50	37.1899	0.1258	29.4542	0.5029	32.2873	0.2176	0.0029	0.0163	99.7969	66.1481
XAL110	OL 50	37.4001	0.0146	30.6477	0.5522	32.0788	0.2349	-0.0032	0.0034	100.928	65.106
XAL110	OL 51	37.5429	0.0137	30.1041	0.4374	32.3468	0.2464	0.0096	-0.0012	100.7	65.6992
XAL110	OL 51	37.4491	0.0324	29.8207	0.5038	32.4627	0.2187	-0.0037	0.0014	100.485	65.9924
XAL110	OL 51	37.5678	0.0222	29.7831	0.5716	32.6277	0.2028	0.014	0.0082	100.797	66.1344
XAL110	OL 51	37.471	0.002	29.8469	0.4756	32.5882	0.2142	-0.0058	0.0234	100.615	66.0592
XAL110	OL 51	37.7115	0.0239	29.9151	0.4979	32.5388	0.2149	0.0067	0.0241	100.933	65.9739
XAL110	OL 51	37.4883	0.0053	30.2723	0.5104	32.3973	0.2197	-0.0025	0.0155	100.906	65.6088
XAL110	OL 51	37.3036	0.0174	30.5729	0.5598	32.1759	0.2363	0.0002	-0.0036	100.862	65.23
XAL110	OL 51	38.5179	0.7347	29.456	0.4276	29.842	0.3317	0.0122	0.0429	99.365	64.3613
XAL110	OL 51	37.8214	0.0364	28.7722	0.4237	33.5707	0.1809	-0.0018	0.0237	100.827	67.5312
XAL110	OL 51	37.849	0.0202	28.7497	0.6074	32.6103	0.1965	0.0098	0.0224	100.065	66.909
XAL110	OL 51	37.7938	0.0292	28.6584	0.4759	33.7914	0.1896	0.01	-0.0082	100.94	67.7612
XAL110	OL 51	37.7403	0.0126	28.9412	0.4	33.5079	0.1903	-0.0022	0.0156	100.806	67.3614
XAL110	OL 51	37.7657	0.0182	29.2742	0.5116	32.9185	0.2233	0.0118	-0.0123	100.711	66.7165
XAL110	OL 51	37.6319	-0.0008	29.6842	0.5087	32.6333	0.2584	0.0092	-0.02	100.705	66.2126
XAL110	OL 51	37.2195	0.0073	30.1368	0.5597	32.0905	0.2563	-0.0047	0.0025	100.268	65.4952
XAL110	OL 51	37.5019	0.0121	29.3326	0.4996	32.8719	0.2122	-0.0032	0.0084	100.436	66.6406
XAL110	OL 51	37.7421	0.0178	28.6135	0.4721	33.4934	0.1914	0.0027	0.0049	100.538	67.6019
XAL110	OL 51	37.8734	0.0239	28.4076	0.4782	33.7731	0.1704	0.0005	0.0057	100.733	67.9413
XAL110	OL 51	38.0071	0.0275	28.4379	0.4346	33.6395	0.1715	-0.0018	0.0438	100.76	67.8316
XAL110	OL 51	37.8604	0.0166	28.5061	0.4246	33.576	0.1748	-0.0153	0.028	100.571	67.7381
XAL110	OL 51	37.8272	0.0182	28.5876	0.478	33.3297	0.1598	-0.0081	0.0109	100.403	67.5144
XAL110	OL 51	37.7796	0.0443	29.3407	0.4212	31.1637	0.2253	0.0007	0.0392	99.0147	65.4378
XAL110	OL 51	37.7702	0.053	27.9207	0.4709	33.6448	0.1558	-0.0007	0.0148	100.03	68.2341
XAL110	OL 52	37.4242	0.0303	30.6231	0.5397	32.0893	0.2448	-0.0033	0.0305	100.979	65.1317
XAL110	OL 52	37.4499	0.0384	30.5538	0.5813	31.9612	0.2523	0.0097	-0.0032	100.843	65.0924
XAL110	OL 52	37.67	0.2666	30.4624	0.5074	31.0292	0.2808	-0.0112	0.0044	100.21	64.4854
XAL110	OL 52	37.6393	0.4995	30.242	0.5064	29.8209	0.3037	0.0021	-0.0052	99.0086	63.739
XAL110	OL 52	37.6349	0.0166	30.6396	0.5968	31.8208	0.2523	0.0083	0.0166	100.986	64.9284
XAL110	OL 52	37.5993	0.0036	30.1595	0.4955	32.3634	0.2558	0.0001	-0.0144	100.863	65.6694
XAL110	OL 52	37.432	0.0182	30.2465	0.4947	32.2471	0.2505	0.0051	0.0009	100.695	65.5231
XAL110	OL 52	37.6427	0.0299	29.6501	0.4866	32.7465	0.2128	-0.0133	-0.0071	100.748	66.3157
XAL110	OL 52	37.6119	0.0352	29.4705	0.5153	32.856	0.1889	0.0061	0.0179	100.702	66.5255
XAL110	OL 52	37.6194	0.0129	30.1412	0.5382	32.2802	0.2262	0.0008	0.0351	100.854	65.6249
XAL110	OL 52	37.4917	0.0012	30.7633	0.5654	31.8091	0.2594	0.0123	0.0263	100.929	64.8281
XAL110	OL 53	36.9607	0.0262	32.5948	0.5648	30.0565	0.2909	0.0126	0.0054	100.512	62.1752
XAL110	OL 53	37.3517	0.0218	31.4742	0.5308	31.0404	0.254	0.0063	0.0066	100.686	63.742
XAL110	OL 53	37.4754	0.0133	31.1837	0.5028	31.196	0.2531	-0.0164	0.0258	100.634	64.0711
XAL110	OL 53	37.5416	0.0141	30.8767	0.5267	31.5963	0.238	-0.0086	0.0044	100.789	64.5907
XAL110	OL 53	37.4952	0.0267	30.6315	0.5425	31.8426	0.2301	0.0025	0.0319	100.803	64.9499
XAL110	OL 53	37.5823	0.0287	30.8093	0.531	31.6077	0.2702	0.013	-0.0014	100.841	64.6491
XAL110	OL 53	37.4308	0.0255	30.6935	0.5713	31.6742	0.2518	-0.0005	0.0226	100.669	64.783
XAL110	OL 53	36.8645	0.0388	30.9678	0.5045	30.6783	0.2709	0.0146	-0.0037	99.3356	63.8456
XAL110	OL 53	36.922	0.0198	32.8484	0.4622	30.0478	0.2884	-0.002	0.0185	100.605	61.9859
XAL 116	OL 2	39.6355	0.0374	17.3003	0.3135	42.0251	0.2601	0.0238	0.1226	99.7185	81.2389
XAL 116	OL 2	40.0935	0.0358	17.1894	0.2833	42.7052	0.2435	0.0238	0.1687	100.743	81.5792
XAL 116	OL 2	40.4129	0.0506	14.7581	0.2228	44.6081	0.245	0.0208	0.1698	100.488	84.3457
XAL 116	OL 2	40.493	0.0333	13.7948	0.2072	45.2358	0.2492	0.0317	0.1986	100.244	85.3917
XAL 116	OL 2	39.8095	0.0291	16.8103	0.3197	42.8973	0.2271	0.0148	0.1845	100.292	81.9785
XAL 116	OL 2	40.43	0.0405	13.6223	0.2054	45.2273	0.2484	0.0201	0.183	99.977	85.5456
XAL 116	OL 2	40.6995	0.0431	14.1465	0.1778	45.4266	0.2472	0.0308	0.1988	100.97	85.1281
XAL 116	OL 2	40.8545	0.0606	13.8762	0.1888	45.1597	0.2487	0.0318	0.204	100.624	85.2972
XAL 116	OL 2	40.6018	0.049	13.9397	0.2357	45.3669	0.2531	0.018	0.1484	100.613	85.2972
XAL 116	OL 2	40.6135	0.0489	14.4138	0.2098	44.8472	0.2538	0.0144	0.171	100.572	84.7243
XAL 116	OL 3	40.5362	0.0443	13.7894	0.1652	45.5727	0.2341	0.0344	0.1732	100.549	85.4891
XAL 116	OL 3	40.808	0.0569	13.0144	0.1814	45.8739	0.2175	0.0054	0.1705	100.328	86.2701
XAL 116	OL 3	40.599	0.0655	13.3662	0.1555	45.8406	0.2193	0.0352	0.2177	100.499	85.9423
XAL 116	OL 3	41.0234	0.0642	13.0567	0.1752	45.9038	0.2173	0.0166	0.1949	100.652	86.2394
XAL 116	OL 3	40.8829	0.0481	13.0712	0.1951	45.9797	0.2225	0.032	0.1998	100.631	86.2456
XAL 116	OL 3	40.8304	0.0389	13.316	0.1873	45.8481	0.2198	0.0187	0.2001	100.659	85.9896
XAL 116	OL 3	40.9134	0.0668	13.2052	0.1998	45.8375	0.2171	0.0344	0.1831	100.657	86.0871
XAL 116	OL 3	40.6208	0.0419	13.0915	0.2138	45.6303	0.2299	0.0313	0.1766	100.036	86.1365
XAL 116	OL 4	40.8095	0.5017	12.1403	0.1618	46.2158	0.5133	0.0931	0.2889	100.724	87.1563
XAL 116	OL 4	41.0688	0.0626	11.4457	0.1731	47.6094	0.2426	0.0841	0.3111	100.997	88.1162
XAL 116	OL 4	41.0375	0.0479	11.5592	0.178	47.4481	0.2455	0.0356	0.278	100.83	87.9767
XAL 116	OL 4	40.9559	0.0676	11.6248	0.2088	47.3468	0.2436	0.0608	0.2602	100.769	87.8938
XAL 116	OL 4	40.0678	0.0441	15.9862	0.2294	43.7249	0.216	0.0344	0.2052	100.508	82.9806
XAL 116	OL 5	40.7127	0.0445	13.3967	0.2614	46.0588	0.2208	0.0277	0.2182	100.941	85.9722
XAL 116	OL 5	40.6933	0.0501	13.2135	0.2441	46.0236	0.1945	0.0269	0.2077	100.654	86.1281
XAL 116	OL 5	40.5848	0.045	13.2591	0.2117	46.0109	0.1946	0.0039	0.2377	100.548	86.0836
XAL 116	OL 5	40.5811	0.0364	13.053	0.1359	46.104	0.2001	0.0336	0.1986	100.343	86.2942
XAL 116	OL 5	40.6861	0.082	13.3549	0.1863	46.0968	0.2082	0.0472	0.2024	100.864	86.0198
XAL 116	OL 5	40.7229	0.0662	13.267	0.2091	46.1765	0.2334	0.0242	0.2002	100.9	86.1194
XAL 116	OL 5	40.0773	0.0263	17.5184	0.2636	42.3731	0.2664	0.0296	0.1605	100.715	81.1736
XAL 116	OL 5	40.4144	0.0359	13.6602	0.1671	45.2912	0.2249	0.0308	0.2272	100.052	85.5288
XAL 116	OL 5	40.6847	0.0925	13.3808	0.1854	45.9645	0.2306	0.0192	0.1943	100.752	85.9618
XAL 116	OL 6	40.7375	0.0326	14.1052	0.2094	45.1736	0.2552	0.0238	0.1909	100.728	85.0944
XAL 116	OL 6	40.7364	0.0484	14.2369	0.2096	45.224	0.2317	0.0032	0.1803	100.87	84.9907
XAL 116	OL 6	40.6513	0.0338	14.2289	0.2443	45.2865	0.242	0.0244	0.1517	100.863	85.0153
XAL 116	OL 6	40.48	0.0528	14.1835	0.1964	45.1423	0.2344	0.0219	0.15	100.461	85.0154
XAL 116	OL 6	40.6495	0.0576	14.1005	0.1651	45.1775	0.2352	0.0142	0.1486	100.548	85.0998
XAL 116	OL 6	40.6665	0.0426	14.0248	0.17	45.323	0.2475	0.0305	0.1509	100.656	85.2085
XAL 116	OL 6	40.4788	0.0412	14.2726	0.202	45.3139	0.2398	0.0331	0.1532	100.734	84.984
XAL 116	OL 6	40.5992	0.0604	13.7107	0.2278	45.2068	0.2453	0.024	0.1908	100.265	85.4599
XAL 116	OL 6	40.6241	0.0624	13.9961	0.1995	45.1678	0.2575	0.0172	0.1478	100.472	85.1913
XAL 116	OL 6	40.5425	0.0599	14.6827	0.1909	44.4816	0.24	0.019	0.1705	100.387	84.3759
XAL 116	OL 6	40.6424	0.0533	14.828	0.1747	44.2059	0.2384	0.0022	0.1509	100.296	84.163
XAL 116	OL 6	40.0347	0.0352	17.4687	0.3673	42.4287	0.2077	0.0086	0.1598	100.711	81.2368
XAL 116	OL 6	40.5136	0.0352	15.5495	0.2381	43.6165	0.2305	0.0285	0.1484	100.36	83.3338
XAL 116	OL 6	40.1298	0.0363	15.9322	0.3244	43.5196	0.2256	0.0272	0.1728	100.368	82.9618
XAL 116	OL 6	39.9516	0.0391	16.4064	0.2315	42.9736	0.2451	0.0385	0.1706	100.056	82.3605
XAL 116	OL 6	40.5368	0.0469	14.5476	0.1603	44.619	0.2514	0.0161	0.1812	100.359	84.5378
XAL 116	OL 7	40.9513	0.0508	12.2656	0.2479	46.2071	0.2405	0.0342	0.2269	100.224	87.0387
XAL 116	OL 7	41.2107	0.044	12.0446	0.2408	46.7245	0.2363	0.0507	0.2346	100.786	87.366
XAL 116	OL 7	41.1443	0.0578	12.007	0.1646	46.6619	0.2332	0.0288	0.2182	100.516	87.3859
XAL 116	OL 7	40.9738	0.0805	11.9938	0.1261	46.5668	0.2349	0.041	0.2416	100.258	87.3754
XAL 116	OL 7	41.0269	0.0721	12.1173	0.1028	46.6699	0.2317	0.0386	0.2229	100.482	87.2866
XAL 116	OL 7	40.8395	0.0708	11.9152	0.2054	46.8815	0.2381	0.0584	0.2272	100.436	87.5214
XAL 116	OL 7	40.9826	0.0471	11.9151	0.1672	46.7564	0.2333	0.0454	0.2343	100.382	87.4923
XAL 116	OL 7	40.961	0.0651	12.0399	0.1657	46.6267	0.2315	0.0284	0.2481	100.366	87.3472
XAL 116	OL 7	40.972	0.0394	11.9562	0.1777	46.6353	0.2343	0.0382	0.2323	100.285	87.4262
XAL 116	OL 7	40.9975	0.0527	11.8374	0.2143	46.6562	0.2511	0.0655	0.2427	100.317	87.5405
XAL 116	OL 8	39.0019	0.0171	21.8469	0.3335	38.8291	0.1759	0.0022	0.0876	100.294	76.009
XAL 116	OL 8	39.1585	0.0308	21.7932	0.2953	38.5795	0.1725	0.0146	0.0603	100.105	75.9364
XAL 116	OL 8	38.9344	0.083	22.0698	0.3263	38.613	0.1894	0.0089	0.057	100.282	75.7211
XAL 116	OL 8	38.9644	0.0457	21.3449	0.3789	38.9059	0.1834	0.0012	0.1032	99.9276	76.466
XAL 116	OL 8	39.0549	0.0247	21.6525	0.2703	38.8666	0.1788	-0.011	0.1067	100.143	76.1893
XAL 116	OL 8	39.1129	0.0599	21.8926	0.2792	38.8661	0.1705	0.0223	0.0569	100.46	75.9883
XAL 116	OL 8	39.1168	0.0249	21.8692	0.2808	38.7526	0.1789	0.0117	0.0845	100.319	75.9544
XAL 116	OL 8	39.1832	0.0528	21.5469	0.3301	39.237	0.1921	0.015	0.0927	100.65	76.4489
XAL 116	OL 9	38.5058	0.0289	23.9242	0.3752	36.8743	0.1768	0.0039	0.0572	99.9463	73.3155
XAL 116	OL 9	38.266	0.0379	24.5482	0.414	36.3617	0.1709	0.0187	0.0766	99.894	72.5307
XAL 116	OL 9	38.3014	0.0015	24.3645	0.3781	36.3872	0.1805	0.0243	0.0739	99.7114	72.6939
XAL 116	OL 9	38.2867	0.0395	24.3908	0.3362	36.5157	0.1723	0.0072	0.0944	99.8427	72.7426
XAL 116	OL 9	38.3294	0.0257	24.3654	0.4014	36.4045	0.1842	0.0023	0.072	99.785	72.7027
XAL 116	OL 9	38.3459	0.0287	24.2449	0.4397	36.4433	0.1861	0.0182	0.0513	99.758	72.8221
XAL 116	OL 9	38.2825	0.0341	24.747	0.3761	36.3841	0.16	-0.004	0.0661	100.046	72.382
XAL 116	OL 9	38.2871	0.0204	24.1436	0.3934	36.3662	0.164	0.0094	0.0532	99.4372	72.863
XAL 116	OL 9	38.5096	0.0323	23.7063	0.428	37.1591	0.1685	0.0171	0.0918	100.113	73.6437
XAL 116	OL 9	38.7456	0.0326	21.2881	0.4647	38.3365	0.2641	0.0266	0.1203	99.2785	76.248
XAL 116	OL 9	39.5918	0.0411	17.7042	0.2851	41.6307	0.2401	0.0325	0.1411	99.6666	80.7384
XAL 116	OL 9	38.9806	0.0482	19.8473	0.3193	40.0226	0.2894	0.0193	0.1147	99.6413	78.2354
XAL 116	OL 9	39.0737	0.0484	20.4943	0.3728	39.531	0.2484	0.0311	0.1003	99.9	77.4692
XAL 116	OL 9	39.6245	0.0984	18.1147	0.356	41.1954	0.2808	0.0202	0.1672	99.8572	80.2132
XAL 116	OL 9	39.4559	0.0288	19.8882	0.3129	39.482	0.2732	0.0184	0.1162	99.5756	77.9676
XAL 116	OL 9	39.0272	0.0607	19.9286	0.4827	39.5951	0.3063	0.0116	0.1218	99.5339	77.9819
XAL 116	OL 9	39.7875	0.0352	17.3514	0.2862	41.9914	0.2525	0.002	0.1523	99.8584	81.1817
XAL 116	OL 9	39.5589	0.0297	17.9032	0.2891	41.6138	0.281	0.0174	0.1481	99.8412	80.5575
XAL 116	OL 10	40.2965	0.0497	15.8926	0.2478	43.6983	0.2588	0.0165	0.128	100.588	83.055
XAL 116	OL 10	40.3051	0.0474	16.3953	0.2951	43.2321	0.2506	0.0111	0.1257	100.662	82.4574
XAL 116	OL 10	40.1512	0.057	16.217	0.224	43.0381	0.2444	0.0031	0.1218	100.056	82.5503
XAL 116	OL 10	40.1826	0.064	16.4547	0.2415	43.1969	0.2505	0.0205	0.094	100.505	82.3934
XAL 116	OL 10	40.2167	0.062	16.2579	0.2774	42.9527	0.2443	-0.0039	0.1196	100.127	82.4854
XAL 116	OL 10	40.3337	0.0562	16.5291	0.2416	43.1239	0.2605	0.0183	0.1272	100.691	82.3032
XAL 116	OL 10	40.2003	0.0586	16.3092	0.2286	42.9517	0.2482	0.0118	0.1192	100.127	82.4396
XAL 116	OL 10	40.1765	0.3979	16.4712	0.3155	41.8437	0.7115	0.0089	0.0983	100.023	81.9117
XAL 116	OL 10	40.2734	0.0506	16.4613	0.1895	43.2496	0.2583	0.0072	0.114	100.604	82.405
XAL 116	OL 10	40.1111	0.0522	16.3785	0.2929	43.3663	0.2572	-0.0095	0.1401	100.589	82.5171
XAL 116	OL 10	40.1716	0.0493	15.5857	0.2154	44.1415	0.2479	0.0226	0.1397	100.574	83.4671
XAL 116	OL 12	40.9219	0.0511	13.3587	0.1974	45.7488	0.1935	0.0239	0.2198	100.715	85.9248
XAL 116	OL 12	40.7925	0.0909	13.3315	0.1563	45.7794	0.2025	0.0407	0.2329	100.627	85.9576
XAL 116	OL 12	40.7385	0.0524	12.9948	0.1613	45.6829	0.2043	0.0365	0.2151	100.086	86.2385
XAL 116	OL 12	40.9114	0.0784	13.4989	0.1043	45.8976	0.2051	0.0389	0.2172	100.952	85.8377
XAL 116	OL 12	40.8417	0.1625	13.0565	0.1979	45.6171	0.1933	0.0223	0.2274	100.319	86.1649
XAL 116	OL 12	40.8551	0.074	13.3097	0.2079	45.8707	0.1949	0.0112	0.2186	100.742	86.0013
XAL 116	OL 12	41.1193	0.3378	12.8214	0.1989	45.3484	0.1848	0.0222	0.2442	100.277	86.3106
XAL 116	OL 12	41.0653	0.2135	12.9304	0.2043	45.723	0.1987	0.0241	0.182	100.541	86.3076
XAL 116	OL 12	40.7516	0.0726	13.6194	0.1748	45.913	0.2059	0.0346	0.2006	100.972	85.7333
XAL 116	OL 12	40.7734	0.0908	13.5114	0.1558	45.9368	0.2182	0.0312	0.2167	100.934	85.8367
XAL 116	OL 12	40.751	0.0795	13.3376	0.1326	45.8584	0.2065	0.017	0.2239	100.607	85.9728
XAL 116	OL 12	40.6848	0.1047	13.1256	0.1584	45.7536	0.2234	0.0389	0.2182	100.308	86.1376
XAL 116	OL 12	40.9331	0.0738	13.2029	0.1659	45.8751	0.2199	0.0219	0.2411	100.734	86.0991
XAL 116	OL 12	40.9919	0.0797	13.3998	0.1776	45.7948	0.2086	0.0199	0.2419	100.914	85.8997
XAL 116	OL 13	40.0459	-0.0031	16.868	0.2271	43.055	0.1146	0.011	0.126	100.445	81.9818
XAL 116	OL 13	40.07	0.0177	17.1914	0.2288	42.6532	0.0588	-0.0202	0.142	100.342	81.5589
XAL 116	OL 13	40.0452	0.0291	17.5766	0.3267	42.6632	0.0451	-0.0214	0.1009	100.765	81.227
XAL 116	OL 13	39.9785	0.0079	17.3198	0.2513	42.5513	0.0603	-0.0019	0.1126	100.28	81.4107
XAL 116	OL 13	39.9057	0.0016	16.8859	0.26	42.7288	0.1013	0.012	0.1364	100.032	81.8535
XAL 116	OL 13	39.9465	-0.0055	17.1122	0.2545	42.5951	0.0505	-0.0026	0.1324	100.083	81.6081
XAL 116	OL 13	39.927	0.0091	17.5541	0.2911	42.6947	0.0591	0.0012	0.1334	100.67	81.258
XAL 116	OL 13	40.0226	0.0061	17.3222	0.2306	42.6521	0.0564	0.0181	0.097	100.405	81.4444
XAL 116	OL 13	40.0618	-0.003	17.094	0.25	42.414	0.078	0.009	0.125	100.029	81.56
XAL 116	OL 13	39.831	0.0085	17.2146	0.1358	42.2446	0.0687	0.0106	0.0676	99.5814	81.3933
XAL 116	OL 13	39.9366	0.0233	17.2044	0.2588	42.6656	0.0648	-0.0227	0.0906	100.221	81.5522
XAL 116	OL 14	39.4725	0.043	19.4552	0.3245	40.3483	0.3009	0.0199	0.0836	100.048	78.7095
XAL 116	OL 14	39.3196	0.3497	19.7803	0.3106	40.0806	0.2707	0.0048	0.056	100.172	78.3175
XAL 116	OL 14	39.4585	0.0402	19.6698	0.3787	40.3075	0.2558	-0.0182	0.0821	100.174	78.508
XAL 116	OL 14	39.5961	0.0498	19.8659	0.2293	40.2665	0.269	-0.0217	0.088	100.343	78.323
XAL 116	OL 14	39.552	0.0688	19.4031	0.2703	40.432	0.2875	-0.0152	0.0848	100.083	78.7889
XAL 116	OL 14	40.0193	0.0446	16.3679	0.3052	43.5938	0.2234	0.0603	0.2045	100.819	82.6016
XAL 116	OL 14	40.1365	0.034	16.7863	0.2484	42.8929	0.2511	0.018	0.1923	100.56	81.998
XAL 116	OL 14	40.0677	0.0442	16.703	0.2404	43.0141	0.2336	0.0286	0.1614	100.493	82.1126
XAL 116	OL 14	40.0659	0.0498	16.9546	0.2595	42.5777	0.2212	0.0347	0.2422	100.406	81.7404
XAL 116	OL 14	39.906	0.0354	16.6496	0.2101	42.6863	0.2398	0.0299	0.1977	99.9548	82.0473
XAL 116	OL 14	40.571	0.0495	14.1384	0.1678	44.4353	0.2237	0.0779	0.2597	99.9233	84.8541
XAL 116	OL 14	39.9142	0.0312	16.5419	0.3189	42.6863	0.2381	0.0148	0.1793	99.9247	82.1428
XAL 116	OL 14	39.782	0.0199	16.9082	0.2503	42.6515	0.2603	0.0329	0.1725	100.078	81.8071
XAL 116	OL 14	40.1593	0.0095	15.8384	0.169	43.2507	0.2144	0.0349	0.19	99.8663	82.9578
XAL 116	OL 15	40.6957	0.0522	13.4843	0.1532	45.0212	0.2296	0.0389	0.223	99.8982	85.6149
XAL 116	OL 15	40.507	0.0603	13.347	0.2296	45.063	0.2195	0.0357	0.2096	99.6717	85.7518
XAL 116	OL 15	40.4455	0.0624	13.5282	0.2274	45.0916	0.2237	0.0211	0.1832	99.7832	85.5941
XAL 116	OL 15	40.795	0.0554	13.5725	0.2133	44.9375	0.2194	0.0228	0.1721	99.9879	85.5115
XAL 116	OL 15	40.0316	0.0356	15.2542	0.2808	43.6512	0.2317	0.0385	0.158	99.6816	83.6093
XAL 116	OL 16	40.7666	0.0558	12.885	0.1334	46.0687	0.2405	0.0284	0.228	100.406	86.4378
XAL 116	OL 16	40.8867	0.0472	12.8334	0.1617	46.2875	0.2257	0.02	0.2439	100.706	86.5401
XAL 116	OL 16	41.0058	0.0221	12.5637	0.1874	46.2875	0.2292	0.0188	0.2316	100.546	86.7855
XAL 116	OL 16	40.9463	0.055	12.7142	0.1397	46.2473	0.2278	0.0141	0.2053	100.549	86.6384
XAL 116	OL 16	40.6993	0.0523	12.6014	0.1399	46.392	0.2149	0.0196	0.224	100.343	86.777
XAL 116	OL 17	40.4879	0.0227	15.4331	0.2155	43.6913	0.2215	0.0196	0.1893	100.281	83.4618
XAL 116	OL 17	40.8764	0.0624	13.6648	0.204	45.3421	0.2077	0.028	0.1971	100.582	85.5385
XAL 116	OL 17	40.861	0.0488	13.3779	0.1931	45.3979	0.2141	0.0145	0.2284	100.336	85.814
XAL 116	OL 17	40.6781	0.0411	13.4218	0.2019	45.113	0.2132	0.0352	0.21	99.9142	85.6972
XAL 116	OL 17	40.8833	0.0255	13.9695	0.1397	45.07	0.2246	0.0285	0.2019	100.543	85.1879
XAL 116	OL 17	40.5515	0.0302	14.3088	0.1849	44.4576	0.2498	0.0061	0.1673	99.9562	84.7061
XAL 116	OL 18	39.7765	0.0296	19.2526	0.3203	41.0355	0.1804	0.0222	0.0782	100.695	79.1644
XAL 116	OL 18	39.8618	0.0378	17.9406	0.2356	41.6658	0.2304	0.0223	0.1211	100.115	80.5445
XAL 116	OL 18	39.7567	0.0331	18.2638	0.2779	41.2564	0.2276	0.0094	0.1141	99.9391	80.1064
XAL 116	OL 18	39.7905	0.0541	17.5885	0.2335	42.0299	0.2566	0.0064	0.1353	100.095	80.9875
XAL 116	OL 18	39.9142	0.0433	17.9581	0.3024	41.9464	0.2324	0.0226	0.1102	100.529	80.6342
XAL 116	OL 18	39.7379	0.0348	18.8417	0.3121	41.1803	0.2194	0.0219	0.0844	100.432	79.5752
XAL 116	OL 18	39.635	0.0239	19.3112	0.3774	40.7544	0.198	-0.01	0.0487	100.339	79.0002
XAL 116	OL 18	39.7287	0.029	18.8071	0.3242	41.2946	0.2136	0.0251	0.0825	100.505	79.65
XAL 116	OL 19	39.0369	0.042	21.6312	0.3447	38.5461	0.2004	-0.0163	0.0471	99.8319	76.0566
XAL 116	OL 19	39.0166	0.026	22.3684	0.331	38.4154	0.201	0.0013	0.06	100.42	75.3779
XAL 116	OL 19	38.9974	0.0124	22.2771	0.3405	38.2289	0.1938	0.0241	0.0379	100.112	75.3636
XAL 116	OL 19	38.8841	0.0457	22.0478	0.364	38.2691	0.1976	-0.0077	0.0294	99.8301	75.5746
XAL 116	OL 19	38.9745	0.0351	21.3988	0.3166	38.3442	0.2002	-0.0066	0.0784	99.3411	76.1575
XAL 116	OL 19	39.967	0.041	17.0389	0.2312	42.5398	0.2533	0.0199	0.1802	100.271	81.653
XAL 116	OL 19	39.9907	0.0443	17.0897	0.2565	42.2211	0.2493	0.0224	0.1513	100.025	81.4952
XAL 116	OL 19	39.8526	0.0233	16.8319	0.2161	42.5653	0.2425	0.0181	0.1676	99.9174	81.8441
XAL 116	OL 19	39.8115	0.0369	17.5399	0.2836	42.2178	0.2372	0.0259	0.171	100.324	81.0984
XAL 116	OL 19	39.6994	0.047	18.0296	0.3447	41.6775	0.2524	0.0281	0.1235	100.202	80.4713
XAL 116	OL 19	39.911	0.0191	16.7885	0.2882	42.1692	0.2391	0.0362	0.1729	99.6242	81.7436
XAL 116	OL 19	39.733	0.0334	18.3544	0.3442	41.2431	0.2853	0.0478	0.1204	100.162	80.0223
XAL 116	OL 19	40.0983	0.0365	16.7525	0.2974	42.4754	0.2383	0.0378	0.1741	100.11	81.8829
XAL 116	OL 20	39.3009	0.09	17.8272	0.2995	41.5607	0.2514	-0.0066	0.1391	99.4622	80.6041
XAL 116	OL 20	40.0402	0.0263	16.3391	0.2482	43.0205	0.2233	0.0094	0.1714	100.078	82.4361
XAL 116	OL 20	39.9695	0.0446	16.1945	0.2181	43.0588	0.2346	0.0142	0.1871	99.9215	82.5774
XAL 116	OL 20	39.956	0.0427	16.2004	0.2968	43.3287	0.2245	0.02	0.1604	100.229	82.6617
XAL 116	OL 20	40.1655	0.0359	15.6879	0.239	43.7189	0.2301	0.0191	0.1366	100.233	83.2429
XAL 116	OL 20	40.1519	0.0218	16.0553	0.2577	43.6882	0.235	0.0288	0.1404	100.579	82.9079
XAL 116	OL 20	39.5204	0.0465	19.4072	0.3528	40.5406	0.2552	0.039	0.1123	100.274	78.8302
XAL 116	OL 21	40.2288	0.0545	14.9728	0.2403	43.9178	0.2257	0.02	0.1803	99.8402	83.9449
XAL 116	OL 21	40.4453	0.0419	14.1761	0.2461	44.7151	0.2386	0.0316	0.1735	100.068	84.9005
XAL 116	OL 21	40.5414	0.0333	13.8002	0.1674	44.6756	0.221	0.0305	0.1907	99.6601	85.2305
XAL 116	OL 21	40.6319	0.0323	14.0188	0.1902	45.1737	0.2365	0.0199	0.1798	100.483	85.1723
XAL 116	OL 21	40.7213	0.0573	13.7001	0.1863	45.0933	0.2256	0.0011	0.1661	100.151	85.4382
XAL 116	OL 21	40.5454	0.0519	14.198	0.2207	45.5321	0.2224	0.0233	0.197	100.991	85.1116
XAL 116	OL 21	40.7598	0.0477	14.4351	0.2339	45.0172	0.2432	0.0105	0.1401	100.888	84.7543
XAL 116	OL 21	40.384	0.0464	14.408	0.2245	44.8251	0.2503	0.0146	0.1739	100.327	84.723
XAL 116	OL 22	40.0044	0.0267	17.144	0.3384	42.549	0.2306	0.033	0.1791	100.505	81.5637
XAL 116	OL 22	40.838	0.0712	12.8343	0.1943	46.236	0.2347	0.0264	0.2246	100.659	86.5262
XAL 116	OL 22	41.1433	0.0792	11.9096	0.2157	46.7994	0.2434	0.048	0.2371	100.676	87.5074
XAL 116	OL 22	41.1878	0.0925	11.8783	0.1487	46.921	0.2426	0.0415	0.2525	100.765	87.5646
XAL 116	OL 22	41.0919	0.0701	11.9016	0.1197	46.8014	0.248	0.0475	0.2221	100.502	87.5151
XAL 116	OL 22	40.7059	0.2152	13.8453	0.165	45.4959	0.2479	0.0282	0.1992	100.903	85.4178
XAL 116	OL 23	40.3635	0.032	16.3556	0.2357	43.5421	0.2306	0.0167	0.1624	100.939	82.5954
XAL 116	OL 23	40.4164	0.0456	14.7576	0.2308	44.3449	0.2444	0.0228	0.2044	100.267	84.268
XAL 116	OL 23	40.4884	0.0568	14.1656	0.2205	44.7244	0.2347	0.0432	0.1822	100.116	84.9128
XAL 116	OL 23	40.648	0.0297	13.822	0.16	45.197	0.2299	0.0242	0.2353	100.346	85.3565
XAL 116	OL 23	40.6032	0.0713	14.3869	0.1865	44.9537	0.2271	0.0271	0.1773	100.633	84.779
XAL 116	OL 23	40.5377	0.0378	14.1637	0.2665	44.9599	0.2384	0.0346	0.1933	100.432	84.9817
XAL 116	OL 24	40.8365	0.0519	12.0457	0.2116	46.2984	0.2152	0.0313	0.2746	99.9652	87.2634
XAL 116	OL 24	40.8422	0.0657	12.3469	0.1755	46.5325	0.213	0.0401	0.2973	100.513	87.0436
XAL 116	OL 24	41.1206	0.0601	12.06	0.1391	46.8451	0.1989	0.0274	0.2743	100.725	87.3804
XAL 116	OL 24	41.2169	0.0701	12.0516	0.1493	46.5572	0.2165	0.0341	0.304	100.6	87.3199
XAL 116	OL 24	40.8936	0.0492	12.2561	0.1759	46.6996	0.2204	0.0395	0.2847	100.619	87.1668
XAL 116	OL 24	40.8355	0.0334	11.9739	0.1503	46.4677	0.2213	0.0369	0.3242	100.043	87.3701
XAL 116	OL 24	41.0665	0.057	11.9212	0.2279	46.4936	0.2338	0.0409	0.2681	100.309	87.4248
XAL 116	OL 24	40.8495	0.0554	12.0633	0.1693	46.3554	0.2194	0.0153	0.3082	100.036	87.2611
XAL 116	OL 24	40.8424	0.0477	11.6064	0.134	46.2914	0.2049	0.0248	0.311	99.4626	87.669
XAL 116	OL 24	40.8399	0.0501	11.7541	0.1462	46.5971	0.2314	0.0268	0.2881	99.9338	87.6034
XAL 116	OL 25	40.5588	0.058	14.4931	0.2042	44.6167	0.2523	0.0327	0.2102	100.426	84.5862
XAL 116	OL 25	40.0542	0.725	13.8151	0.2362	44.7292	0.2413	0.0258	0.2009	100.028	85.2321
XAL 116	OL 25	40.8535	0.0576	14.0581	0.1256	45.0882	0.2358	0.0186	0.1686	100.606	85.1128
XAL 116	OL 25	40.7134	0.0521	14.0268	0.2489	45.0251	0.2524	0.028	0.1884	100.535	85.1235
XAL 116	OL 25	40.8293	0.0591	13.7723	0.1662	44.9995	0.2295	0.0326	0.2223	100.311	85.3465
XAL 116	OL 25	40.6895	0.0618	13.842	0.2076	44.9173	0.2337	0.0014	0.2189	100.172	85.2603
XAL 116	OL 25	40.0847	0.3667	13.8331	0.2172	44.3115	0.2291	0.0158	0.2249	99.283	85.097
XAL 116	OL 25	40.8223	0.0581	13.9832	0.2511	44.9854	0.2447	-0.0013	0.16	100.504	85.1517
XAL 118A	OL 1	41.186	0.115	10.1894	0.1681	47.9355	0.2516	0.0339	0.2881	100.177	89.2151
XAL 118A	OL 1	41.4598	0.0579	10.3828	0.1661	48.0995	0.2495	0.0487	0.2788	100.751	89.1473
XAL 118A	OL 1	41.4785	0.0439	10.4541	0.13	48.2129	0.262	0.0309	0.2773	100.916	89.1025
XAL 118A	OL 1	41.4531	0.039	10.4874	0.18	48.0374	0.2395	0.0215	0.255	100.705	89.8594
XAL 118A	OL 1	41.373	0.0575	9.5862	0.1229	47.8624	0.2542	0.0253	0.235	99.5168	85.4725
XAL 118A	OL 2	41.8586	0.0544	10.3138	0.1438	47.9792	0.2478	0.0442	0.3153	100.969	89.1319
XAL 118A	OL 2	41.6683	0.0495	10.3948	0.1403	47.8555	0.2548	0.0352	0.2657	100.666	89.138
XAL 118A	OL 2	41.6126	0.0626	10.4176	0.1733	48.0441	0.2607	0.0539	0.2909	100.917	89.0048
XAL 118A	OL 2	41.6512	0.0449	10.5699	0.1522	47.9185	0.2381	0.0221	0.2658	100.851	88.9996
XAL 118A	OL 2	41.6618	0.0523	10.5499	0.1569	47.8424	0.2257	0.0216	0.2407	100.76	88.7728
XAL 118A	OL 2	41.6729	0.061	10.7951	0.1703	47.723	0.2389	0.0438	0.2554	100.977	88.6311
XAL 118A	OL 2	41.5719	0.164	10.8072	0.158	46.7852	0.2686	0.0327	0.2751	100.063	88.7604
XAL 118A	OL 2	41.6008	0.0465	10.6441	0.1309	47.7353	0.2498	0.0397	0.277	100.732	89.0634
XAL 118A	OL 3	41.0141	0.0479	10.4187	0.1725	48.1177	0.2455	0.0744	0.2965	100.396	89.3881
XAL 118A	OL 3	41.1534	0.0699	10.2022	0.1541	48.2401	0.2648	0.0709	0.3464	100.501	89.4781
XAL 118A	OL 3	41.2872	0.0716	10.1191	0.138	48.2539	0.2473	0.0752	0.3175	100.504	89.4938
XAL 118A	OL 3	41.2643	0.0631	10.0952	0.1129	48.2924	0.2375	0.0653	0.3245	100.453	89.5553
XAL 118A	OL 3	40.9969	0.0688	10.0081	0.1643	48.2615	0.2465	0.0676	0.3093	100.132	89.8641
XAL 118A	OL 3	41.6108	0.5951	9.7629	0.1644	47.8509	0.2505	0.0584	0.3057	100.609	89.4451
XAL 118A	OL 3	41.034	0.0675	10.0081	0.1642	48.2325	0.2537	0.086	0.3185	100.185	89.5069
XAL 118A	OL 3	41.1053	0.0814	10.1051	0.1428	48.3566	0.2598	0.0588	0.3123	100.453	89.5622
XAL 118A	OL 3	41.3008	0.0562	10.0387	0.1326	48.1696	0.2623	0.0621	0.3048	100.344	89.4864
XAL 118A	OL 3	40.8324	0.0673	10.0329	0.1198	48.1271	0.2379	0.0648	0.3238	99.813	89.4232
XAL 118A	OL 3	41.1168	0.0514	10.1856	0.1385	48.1282	0.252	0.0609	0.2967	100.238	89.2295
XAL 118A	OL 3	40.9902	0.0683	10.34	0.1272	47.9943	0.2447	0.0612	0.3316	100.174	89.0025
XAL 118A	OL 3	40.921	0.0619	10.5628	0.1549	47.8901	0.236	0.0493	0.2851	100.177	88.7374
XAL 118A	OL 3	40.8594	0.0641	10.8161	0.1474	47.6375	0.262	0.0447	0.3011	100.126	88.1017
XAL 118A	OL 3	40.8684	0.0576	11.4525	0.1647	47.1448	0.26	0.0219	0.273	100.265	86.4889
XAL 118A	OL 4	41.1421	0.0504	13.0989	0.2143	45.7727	0.221	0.0164	0.209	100.754	84.5475
XAL 118A	OL 4	39.9101	0.2341	14.5874	0.1894	43.9856	0.228	0.0136	0.1581	99.3051	84.0235
XAL 118A	OL 4	40.6192	0.0698	15.0793	0.2338	44.1911	0.202	0.0157	0.1743	100.602	84.0614
XAL 118A	OL 4	40.5815	0.0487	14.9292	0.2484	44.3096	0.212	0.0041	0.1466	100.481	84.5154
XAL 118A	OL 4	40.6336	0.0596	14.4558	0.219	44.3866	0.2217	0.0234	0.15	100.175	84.2454
XAL 118A	OL 4	40.7117	0.0714	14.8603	0.2043	44.4578	0.2092	0.0402	0.1866	100.77	83.8712
XAL 118A	OL 4	40.7277	0.0625	15.2273	0.2123	44.2024	0.2064	0.013	0.1679	100.834	84.4178
XAL 118A	OL 4	40.7011	0.0437	14.5416	0.1967	44.6084	0.2173	0.0125	0.1701	100.517	85.0431
XAL 118A	OL 4	40.7399	0.038	14.0048	0.227	45.0114	0.1984	0.026	0.1545	100.416	86.4079
XAL 118A	OL 4	41.1204	0.0339	12.7315	0.1804	46.1743	0.2124	0.0232	0.2146	100.682	86.7103
XAL 118A	OL 5	40.9741	0.054	12.5983	0.1895	46.1748	0.2484	0.0474	0.2278	100.532	86.7506
XAL 118A	OL 5	40.9497	0.0637	12.5794	0.149	46.322	0.258	-0.011	0.2263	100.551	86.7175
XAL 118A	OL 5	40.9644	0.0277	12.6187	0.1821	46.0848	0.246	0.0271	0.2119	100.362	86.6299
XAL 118A	OL 5	40.9707	0.0436	12.6863	0.1659	46.052	0.2607	0.0396	0.2438	100.467	86.9068
XAL 118A	OL 5	41.0282	0.0657	12.3726	0.1715	46.1967	0.2557	0.0041	0.2589	100.363	87.3534
XAL 118A	OL 5	40.9692	0.0444	11.9224	0.1663	46.5202	0.2235	0.0489	0.2352	100.168	87.6
XAL 118A	OL 5	41.1	0.0557	11.7728	0.1691	46.7088	0.2731	0.0398	0.2767	100.404	87.6112
XAL 118A	OL 5	41.0492	0.0693	11.7621	0.163	46.6834	0.2451	0.0482	0.2735	100.291	87.6504
XAL 118A	OL 5	41.0441	0.0766	11.7222	0.1709	46.6753	0.2596	0.0488	0.2511	100.25	87.7714
XAL 118A	OL 5	41.1149	0.0466	11.6125	0.1698	46.8433	0.2663	0.0398	0.3031	100.388	87.8426
XAL 118A	OL 5	41.1737	0.054	11.5589	0.1627	46.8306	0.2576	0.0543	0.262	100.37	87.6999
XAL 118A	OL 5	41.1924	0.0797	11.7425	0.2007	46.9533	0.2531	0.0389	0.2695	100.742	87.5139
XAL 118A	OL 5	41.0293	0.0517	11.8909	0.1621	46.6654	0.2391	0.0533	0.2891	100.395	87.3593
XAL 118A	OL 5	41.2185	0.0477	12.0544	0.1566	46.5606	0.2251	0.0469	0.2593	100.583	88.3507
XAL 118A	OL 6	41.2295	0.0411	10.976	0.173	47.384	0.2635	0.0462	0.2951	100.425	88.578
XAL 118A	OL 6	41.2231	0.055	10.8975	0.1821	47.4752	0.268	0.0307	0.3026	100.442	88.6937
XAL 118A	OL 6	41.4123	0.2683	10.8044	0.1441	47.2213	0.2965	0.1092	0.2964	100.564	88.6086
XAL 118A	OL 6	41.4099	0.0599	10.8243	0.1427	47.5283	0.2556	0.05	0.2826	100.554	88.6621
XAL 118A	OL 6	41.296	0.0539	10.8329	0.1866	47.6083	0.23	0.0562	0.2838	100.565	88.7315
XAL 118A	OL 6	41.1951	0.0634	10.7637	0.151	47.6175	0.2729	0.0676	0.263	100.401	88.7938
XAL 118A	OL 6	41.3901	0.0555	10.7284	0.1569	47.6318	0.2348	0.0432	0.247	100.505	88.7436
XAL 118A	OL 6	41.1884	0.0732	10.7505	0.1613	47.6132	0.2424	0.03	0.2713	100.357	88.6866
XAL 118A	OL 6	41.4095	0.0536	10.8488	0.1527	47.5788	0.2304	0.0533	0.2496	100.572	88.5143
XAL 118A	OL 6	41.4793	0.0384	11.0145	0.1552	47.4862	0.2503	0.044	0.265	100.733	87.4785
XAL 118A	OL 7	41.0299	0.0468	12.0619	0.1607	46.899	0.2391	0.0635	0.2658	100.771	88.1777
XAL 118A	OL 7	41.2812	0.0772	11.2478	0.1606	47.3874	0.2666	0.0431	0.2978	100.759	88.4854
XAL 118A	OL 7	41.3002	0.0638	10.999	0.1568	47.6008	0.2274	0.0463	0.3034	100.7	88.5878
XAL 118A	OL 7	41.5058	0.0349	10.9576	0.1561	47.6456	0.2651	0.0374	0.2967	100.924	88.5625
XAL 118A	OL 7	41.1771	0.0645	10.9285	0.136	47.6141	0.2771	0.058	0.2913	100.558	88.7414
XAL 118A	OL 7	41.266	0.2227	10.7517	0.1567	47.2924	0.2807	0.0533	0.2751	100.346	88.576
XAL 118A	OL 7	41.2651	0.0522	10.8834	0.1705	47.4834	0.2831	0.0447	0.3218	100.512	88.5114
XAL 118A	OL 7	41.1699	0.1437	10.996	0.1666	47.5513	0.2767	0.0301	0.2714	100.614	88.2378
XAL 118A	OL 7	41.2085	0.1662	11.3018	0.1383	47.3327	0.2742	0.0394	0.2892	100.774	84.8998
XAL 118A	OL 8	40.5031	0.0531	14.7806	0.2276	44.8389	0.2492	0.0055	0.156	100.814	83.252
XAL 118A	OL 8	40.3983	0.0663	15.9621	0.2633	43.5658	0.2575	0.0047	0.1359	100.654	88.2446
XAL 118A	OL 9	41.3939	0.0617	10.5812	0.1406	47.6662	0.2706	0.035	0.3331	100.467	88.8721
XAL 118A	OL 9	41.56	0.0765	10.6643	0.1132	47.677	0.2686	0.0501	0.2974	100.71	88.7827
XAL 118A	OL 9	41.3141	0.0725	10.6994	0.1465	47.5848	0.2485	0.0492	0.2848	100.378	88.8757
XAL 118A	OL 9	41.3555	0.0457	10.6051	0.1666	47.4821	0.2613	0.0475	0.2781	100.242	88.8358
XAL 118A	OL 9	41.3277	0.0777	10.664	0.1611	47.665	0.2585	0.052	0.3029	100.525	85.8795
XAL 118A	OL 10	40.258	0.0313	13.5823	0.1284	44.609	0.2464	0.0142	0.199	99.0685	87.3624
XAL 118A	OL 10	40.8856	0.0447	11.7373	0.1438	46.8448	0.2436	0.0316	0.2611	100.193	87.7493
XAL 118A	OL 10	41.0321	0.0732	11.708	0.1997	47.0558	0.2382	0.0459	0.2585	100.611	88.3607
XAL 118A	OL 11	40.3671	0.0627	10.942	0.1465	47.1907	0.2588	0.0747	0.3093	99.3735	88.8818
XAL 118A	OL 11	40.5879	0.0514	10.5641	0.1616	47.6082	0.2188	0.0514	0.2843	99.5554	88.9494
XAL 118A	OL 11	40.5693	0.0357	10.539	0.1604	47.6198	0.2316	0.032	0.2917	99.505	88.9846
XAL 118A	OL 11	40.5476	0.0955	10.5311	0.1563	47.7928	0.2542	0.0623	0.2509	99.704	89.06
XAL 118A	OL 11	40.4675	0.075	10.4455	0.1486	47.7627	0.2466	0.0489	0.2789	99.4924	89.1192
XAL 118A	OL 11	40.6394	0.0548	10.4262	0.172	47.894	0.2527	0.0566	0.2875	99.7816	88.9148
XAL 118A	OL 11	40.3128	0.0528	10.6143	0.147	47.8834	0.244	0.0278	0.2961	99.584	88.974
XAL 118A	OL 11	40.7202	0.0499	10.6257	0.1679	47.88	0.2641	0.0463	0.2618	100.022	89.1005
XAL 118A	OL 11	40.6802	0.0653	10.4266	0.1469	47.8814	0.2706	0.066	0.2675	99.8081	89.0327
XAL 118A	OL 11	40.8092	0.043	10.5581	0.1552	48.0978	0.2437	0.0375	0.3247	100.279	88.9559
XAL 118A	OL 11	40.7787	0.0538	10.6128	0.1544	47.8091	0.2543	0.0433	0.2966	100.006	88.9616
XAL 118A	OL 11	40.7128	0.0659	10.5747	0.1457	47.8709	0.2428	0.047	0.2881	99.9894	89.032
XAL 118A	OL 11	40.7649	0.0661	10.5068	0.1384	47.8096	0.2745	0.0394	0.2837	99.9063	88.9135
XAL 118A	OL 11	40.6571	0.0357	10.6064	0.1472	47.6978	0.2671	0.0653	0.2967	99.7852	88.2012
XAL 118A	OL 12	41.0881	0.0943	11.3971	0.1828	46.9806	0.2645	0.0594	0.2508	100.309	87.7426
XAL 118A	OL 12	41.0869	0.0601	11.7314	0.1387	47.0798	0.3047	0.0486	0.2566	100.713	87.7857
XAL 118A	OL 12	41.1221	0.3264	11.6371	0.1629	46.4727	0.3079	0.0856	0.2463	100.365	87.5845
XAL 118A	OL 12	41.1066	0.0884	11.7338	0.1997	46.6455	0.2587	0.043	0.2374	100.308	87.4923
XAL 118A	OL 12	40.9229	0.0828	11.8825	0.1627	46.6943	0.2946	0.0456	0.2557	100.345	87.6587
XAL 118A	OL 12	41.3906	0.0641	11.7632	0.1651	46.6965	0.2575	0.0584	0.232	100.634	87.8319
XAL 118A	OL 12	41.1168	0.0796	11.5003	0.1763	46.812	0.2884	0.032	0.2637	100.278	88.1538
XAL 118A	OL 12	41.1106	0.0681	11.21	0.1527	47.0136	0.2625	0.0293	0.2512	100.093	88.423
XAL 118A	OL 12	42.2894	0.0845	11.0585	0.1799	46.6146	0.2699	0.0269	0.2564	100.784	88.1231
XAL 118A	OL 12	41.3806	0.0598	11.1798	0.1414	47.3245	0.249	0.0361	0.2972	100.677	88.5564
XAL 118A	OL 13	41.1313	0.0565	10.8815	0.1628	47.5378	0.2469	0.0724	0.2921	100.395	88.9259
XAL 118A	OL 13	41.2889	0.0582	10.5485	0.1583	47.5255	0.245	0.0518	0.334	100.217	88.8696
XAL 118A	OL 13	41.0928	0.0847	10.5966	0.1641	47.535	0.2502	0.0632	0.3213	100.115	88.936
XAL 118A	OL 13	41.3555	0.0802	10.5814	0.1709	47.6702	0.2547	0.0456	0.2931	100.451	88.9497
XAL 118A	OL 13	41.3919	0.0835	10.5631	0.1404	47.6865	0.2819	0.043	0.2859	100.496	89.0623
XAL 118A	OL 13	41.2595	0.1072	10.4093	0.1223	47.6068	0.2692	0.0402	0.3491	100.167	89.042
XAL 118A	OL 13	41.1992	0.0523	10.4742	0.1496	47.9716	0.2836	0.0463	0.2696	100.458	89.0153
XAL 118A	OL 13	41.2976	0.0399	10.5159	0.1667	47.5344	0.2654	0.0354	0.2883	100.15	89.0515
XAL 118A	OL 13	41.1673	0.0455	10.4194	0.1504	47.7174	0.2928	0.0534	0.3133	100.135	88.9379
XAL 118A	OL 13	41.5356	0.0381	10.6314	0.1493	47.7144	0.2711	0.0356	0.3021	100.68	89.1582
XAL 118A	OL 13	41.6238	0.0701	10.3236	0.1388	47.5962	0.2531	0.0404	0.3135	100.364	88.9469
XAL 118A	OL 13	41.0995	0.0861	10.4778	0.1471	47.4209	0.2758	0.0512	0.2821	99.8388	88.8803
XAL 118A	OL 13	41.2922	0.0599	10.6066	0.1473	47.4966	0.2201	0.0459	0.278	100.156	88.6878
XAL 118A	OL 13	41.2134	0.0806	10.8053	0.1383	47.4507	0.2686	0.0624	0.2785	100.315	86.3592
XAL 118A	OL 14	40.9708	0.0451	13.2597	0.1803	45.6879	0.2413	0.0263	0.2156	100.64	86.6157
XAL 118A	OL 14	41.0764	0.0433	12.6007	0.1897	46.0926	0.2264	0.0186	0.1916	100.458	86.856
XAL 118A	OL 14	41.0725	0.0545	12.4154	0.1922	45.9913	0.2644	0.0093	0.2571	100.274	86.6363
XAL 118A	OL 14	40.8574	0.0432	12.6315	0.177	46.033	0.2312	0.0269	0.2292	100.238	85.4345
XAL 118A	OL 14	40.7773	0.0532	13.949	0.2071	45.1162	0.2192	0.003	0.2009	100.528	86.675
XAL 118A	OL 14	41.2222	0.0881	12.4792	0.1834	46.2957	0.224	0.0528	0.2297	100.783	86.9601
XAL 118A	OL 14	41.1058	0.0573	12.3347	0.1874	46.2115	0.2537	0.0262	0.1972	100.401	86.9378
XAL 118A	OL 14	41.013	0.0653	12.3627	0.1521	46.1855	0.2356	0.0448	0.2358	100.306	86.8033
XAL 118A	OL 14	41.0283	0.0525	12.5049	0.1749	45.9908	0.2508	0.0283	0.2549	100.298	86.8189
XAL 118A	OL 14	41.0096	0.043	12.4697	0.161	46.2264	0.272	0.0096	0.2467	100.447	86.8283
XAL 118A	OL 14	41.0626	0.0484	12.5088	0.1635	46.2304	0.268	0.0041	0.2267	100.515	86.7748
XAL 118A	OL 14	40.9252	0.0596	12.5219	0.1839	46.0343	0.2603	0.0115	0.2383	100.252	86.7847
XAL 118A	OL 14	40.9413	0.05	12.4768	0.1854	45.9089	0.2604	0.0331	0.2152	100.085	85.0677
XAL 118A	OL 15	40.728	0.0532	14.308	0.1964	44.7758	0.2377	0.0142	0.1378	100.473	83.8298
XAL 118A	OL 15	40.5456	0.0411	15.3231	0.2267	43.9462	0.2187	0.0209	0.1405	100.485	82.9966
XAL 118A	OL 15	40.3714	0.0433	15.9891	0.2173	43.4203	0.2072	0.026	0.1204	100.412	82.7048
XAL 118A	OL 15	40.3343	0.0683	16.1868	0.2319	43.3058	0.2028	0.0211	0.1315	100.517	82.8415
XAL 118A	OL 15	40.5028	0.0506	16.0136	0.2153	43.3914	0.243	0.0208	0.1156	100.577	83.1619
XAL 118A	OL 15	40.4632	0.023	15.6322	0.2622	43.4931	0.2134	0.009	0.1329	100.252	83.8514
XAL 118A	OL 15	40.5007	0.0577	14.9908	0.2449	44.1369	0.2346	0.0049	0.1549	100.352	84.4267
XAL 118A	OL 15	40.541	0.0336	14.5299	0.2182	44.5075	0.2309	0.0068	0.1619	100.25	85.2412
XAL 118A	OL 15	40.6875	0.0559	13.7845	0.2014	45.0327	0.2574	0.0309	0.2021	100.275	87.481
XAL 118A	OL 16	41.0177	0.0529	11.612	0.1701	46.9384	0.2611	0.0577	0.2341	100.342	87.7774
XAL 118A	OL 16	41.2983	0.0632	11.698	0.1693	46.9709	0.2699	0.0452	0.2543	100.771	87.7459
XAL 118A	OL 16	41.2296	0.0654	11.6723	0.1524	46.89	0.2707	0.0432	0.2479	100.578	87.6425
XAL 118A	OL 16	40.9517	0.281	11.6113	0.197	45.5003	0.2798	0.08	0.2392	99.1836	87.51
XAL 118A	OL 16	41.275	0.0726	11.7677	0.1558	46.9389	0.2603	0.0475	0.2204	100.752	87.7171
XAL 118A	OL 16	41.3356	0.0582	11.7325	0.1543	47.0227	0.2655	0.0462	0.2398	100.876	87.7672
XAL 118A	OL 16	41.1026	0.0577	11.6428	0.1688	47.0027	0.2435	0.057	0.2355	100.505	87.8631
XAL 118A	OL 16	41.052	0.0766	11.5752	0.1636	47.0926	0.2499	0.0526	0.2217	100.48	87.9667
XAL 118A	OL 16	41.1068	0.06	11.4956	0.1611	47.1917	0.2544	0.0246	0.2394	100.548	87.9825
XAL 118A	OL 16	41.3018	0.0634	11.503	0.1865	47.0971	0.2124	0.0264	0.2621	100.664	88.7184
XAL 118A	OL 17	41.2738	0.0532	10.685	0.1707	47.6052	0.2612	0.0588	0.3055	100.424	88.8059
XAL 118A	OL 17	41.4424	0.0781	10.7343	0.154	47.7368	0.2456	0.0554	0.3246	100.775	88.8299
XAL 118A	OL 17	41.3798	0.0322	10.6664	0.159	47.6208	0.2256	0.0289	0.316	100.42	88.8701
XAL 118A	OL 17	41.208	0.0452	10.6012	0.149	47.5361	0.2428	0.0462	0.2827	100.119	88.8457
XAL 118A	OL 17	41.3056	0.0815	10.6732	0.1677	47.6257	0.2436	0.0782	0.3014	100.493	88.8382
XAL 118A	OL 17	41.3496	0.0581	10.6748	0.1455	47.6949	0.2633	0.0493	0.288	100.552	88.764
XAL 118A	OL 17	41.2416	0.0654	10.7263	0.1599	47.4501	0.2484	0.0583	0.309	100.266	88.7687
XAL 118A	OL 17	41.4954	0.0409	10.7509	0.1488	47.6715	0.242	0.0181	0.3256	100.703	88.8287
XAL 118A	OL 17	41.1941	0.0553	10.6162	0.1526	47.4063	0.2224	0.0436	0.3037	100.002	88.7542
XAL 118A	OL 17	41.3549	0.0596	10.7618	0.1613	47.6096	0.2496	0.0521	0.3238	100.571	88.6776
XAL 118A	OL 17	41.2619	0.0711	10.8007	0.1334	47.3959	0.2468	0.0629	0.2618	100.239	88.9233
XAL 118A	OL 17	41.5229	0.0723	10.5637	0.1862	47.5591	0.2528	0.058	0.3126	100.541	88.716
XAL 118A	OL 17	41.4236	0.0576	10.7892	0.1546	47.6222	0.2544	0.0498	0.3189	100.679	81.1227
XAL 118A	OL 18	40.5288	0.566	18.8892	0.2911	39.3855	0.2505	-0.0022	0.0562	99.9651	78.8211
XAL 118A	OL 18	39.8881	0.0283	19.0345	0.2679	41.3421	0.2179	0.0076	0.0446	100.831	80.3042
XAL 118A	OL 18	39.9296	0.0607	18.1009	0.1853	41.9524	0.2244	0.0058	0.0748	100.534	80.2604
XAL 118A	OL 18	39.7907	0.0263	18.3724	0.2813	41.8162	0.2109	0.0102	0.0876	100.596	83.5774
XAL 118A	OL 18	40.3997	0.0374	14.8398	0.2198	44.3309	0.2402	0.0273	0.2045	100.3	87.5503
XAL 118A	OL 19	41.3726	0.057	11.4553	0.2065	46.9916	0.2225	0.0496	0.2974	100.671	87.9156
XAL 118A	OL 19	41.3898	0.0629	11.5175	0.1632	46.9698	0.2509	0.0532	0.3031	100.716	88.0468
XAL 118A	OL 19	41.3181	0.0433	11.3657	0.1524	47.176	0.2326	0.053	0.2739	100.618	88.1626
XAL 118A	OL 19	41.3843	0.0678	11.2791	0.1502	47.018	0.2537	0.0369	0.2742	100.48	88.1571
XAL 118A	OL 19	41.2907	0.0647	11.2757	0.1439	47.2803	0.2362	0.0332	0.263	100.604	88.1568
XAL 118A	OL 19	41.3343	0.0581	11.3264	0.1562	47.2513	0.2298	0.0293	0.2649	100.661	88.2337
XAL 118A	OL 19	41.5367	0.0378	11.2576	0.1881	47.2519	0.2742	0.0526	0.2812	100.884	88.0891
XAL 118A	OL 19	41.1965	0.0275	11.3374	0.2028	47.1218	0.2593	0.0487	0.2728	100.487	88.2938
XAL 118A	OL 19	41.2804	0.0415	11.1233	0.1702	47.0715	0.2294	0.0416	0.2775	100.257	88.2847
XAL 118A	OL 19	41.1571	0.045	11.1123	0.1857	47.0167	0.2278	0.0336	0.2921	100.068	88.2336
XAL 118A	OL 19	41.4902	0.0586	11.2059	0.1538	46.857	0.2234	0.0553	0.2839	100.352	88.1019
XAL 118A	OL 19	41.3878	0.0437	11.2988	0.1267	47.069	0.2778	0.0391	0.2984	100.551	88.0174
XAL 118A	OL 19	41.2371	0.0565	11.378	0.1683	46.7875	0.2546	0.04	0.2809	100.221	87.827
XAL 118A	OL 19	41.285	0.0863	11.5874	0.1647	46.7985	0.2696	0.0858	0.2382	100.542	87.8108
XAL 118A	OL 19	41.2397	0.0569	11.5728	0.1791	46.8208	0.282	0.055	0.2653	100.483	88.4705
XAL 118A	OL 20	40.3248	0.0569	10.7609	0.1676	47.1799	0.2683	0.0488	0.3046	99.1233	88.883
XAL 118A	OL 20	40.139	0.0312	10.5241	0.1725	47.5765	0.256	0.0379	0.3172	99.0662	89.2256
XAL 118A	OL 20	40.1427	0.0488	10.2643	0.1562	47.937	0.2612	0.0593	0.2739	99.1455	89.2782
XAL 118A	OL 20	40.2399	0.0553	10.2924	0.1476	48.0327	0.2685	0.0906	0.3159	99.4678	89.2907
XAL 118A	OL 20	40.3551	0.0491	10.2576	0.1524	47.8989	0.2476	0.0348	0.3126	99.3169	89.2912
XAL 118A	OL 20	40.2404	0.0697	10.2424	0.1569	47.9946	0.2471	0.079	0.3146	99.3482	89.1529
XAL 118A	OL 20	40.3779	0.0411	10.4349	0.129	48.0938	0.2313	0.0335	0.2734	99.6115	89.0694
XAL 118A	OL 20	40.3719	0.0525	10.5188	0.1365	47.9504	0.244	0.0684	0.3074	99.6675	87.0278
XAL 118A	OL 20	40.1879	0.0352	12.674	0.1771	46.477	0.2309	0.0505	0.2301	100.09	80.7592
XAL 118A	OL 21	39.5813	0.0322	19.209	0.3093	40.8793	0.2887	0.0163	0.1101	100.426	78.4825
XAL 118A	OL 21	39.283	0.0213	19.8922	0.2586	40.4848	0.2323	0.0046	0.1101	100.287	78.6523
XAL 118A	OL 21	39.6317	0.0303	19.7279	0.3094	40.8647	0.2312	0.0021	0.0786	100.876	78.8215
XAL 118A	OL 21	39.3039	0.0082	19.4173	0.3054	40.6419	0.2335	-0.0029	0.1168	100.024	87.128
XAL 118A	OL 22	40.701	0.0752	11.156	0.167	47.6077	0.2362	0.0497	0.3106	100.309	89.2329
XAL 118A	OL 22	41.0817	0.0488	10.3064	0.1461	48.3458	0.2336	0.0599	0.3109	100.549	89.4894
XAL 118A	OL 22	41.0001	0.0517	10.0858	0.1345	48.2338	0.2384	0.0438	0.3087	100.096	89.5679
XAL 118A	OL 22	40.9004	0.0678	10.01	0.1503	48.2874	0.2525	0.0642	0.2966	100.035	89.4757
XAL 118A	OL 22	40.9869	0.0351	10.146	0.1335	48.36	0.2618	0.0465	0.322	100.299	89.4232
XAL 118A	OL 22	40.9775	0.0893	10.1903	0.1665	48.2358	0.2439	0.054	0.2908	100.262	88.8698
XAL 118A	OL 22	41.0784	0.0625	10.7715	0.1823	47.8423	0.2663	0.0524	0.2935	100.55	88.8522
XAL 118A	OL 22	40.6646	0.0493	10.66	0.1706	47.975	0.2587	0.0516	0.2925	100.143	89.2
XAL 118A	OL 22	40.6279	0.0578	10.3736	0.1445	48.3683	0.2459	0.0386	0.3099	100.183	89.3915
XAL 118A	OL 22	40.8464	0.046	10.2403	0.1376	48.3165	0.2588	0.0419	0.284	100.191	89.3984
XAL 118A	OL 22	40.8454	0.066	10.2075	0.1376	48.2518	0.2576	0.0525	0.3094	100.129	89.3743
XAL 118A	OL 22	40.696	0.0591	10.2184	0.1654	48.3095	0.2477	0.0707	0.2802	100.072	89.3285
XAL 118A	OL 22	40.8435	0.0525	10.2898	0.1381	48.1493	0.2584	0.0515	0.3058	100.122	88.9775
XAL 118A	OL 23	41.4953	0.0531	10.6616	0.1438	47.5682	0.2582	0.0547	0.2993	100.535	88.922
XAL 118A	OL 23	41.3454	0.0699	10.5596	0.1512	47.7025	0.255	0.0709	0.2831	100.458	88.9973
XAL 118A	OL 23	41.3639	0.0524	10.5131	0.1722	47.705	0.2739	0.0538	0.3098	100.46	88.9817
XAL 118A	OL 23	41.5178	0.0612	10.5435	0.1647	47.7032	0.2113	0.0721	0.2855	100.565	88.9982
XAL 118A	OL 23	41.3995	0.0527	10.4754	0.1425	47.5168	0.2374	0.0786	0.3001	100.209	88.9077
XAL 118A	OL 23	41.2055	0.0633	10.5661	0.1664	47.6001	0.2557	0.0681	0.313	100.257	88.7679
XAL 118A	OL 23	41.2643	0.072	10.7385	0.1771	47.4733	0.2473	0.0501	0.2961	100.338	85.1545
XAL 118A	OL 23	40.5641	0.06	14.4858	0.2713	44.35	0.2617	0.042	0.1982	100.25	88.0788
XAL 118A	OL 23	41.1794	0.047	10.8765	0.1501	47.336	0.264	0.0438	0.2962	100.202	88.8546
XAL 118A	OL 23	41.3683	0.0677	10.6626	0.1557	47.9469	0.2594	0.06	0.3148	100.823	88.9924
XAL 118A	OL 23	41.3364	0.0725	10.5615	0.1502	47.9198	0.2462	0.0647	0.3279	100.694	89.0177
XAL 118A	OL 23	41.4704	0.0782	10.5621	0.1556	48.0105	0.2201	0.0574	0.3168	100.898	88.8615
XAL 118A	OL 23	41.4101	0.0666	10.6836	0.1673	47.5942	0.2577	0.069	0.3244	100.573	88.8643
XAL 118A	OL 23	41.2645	0.0497	10.6523	0.1751	47.9636	0.2737	0.0565	0.3075	100.741	88.8899
XAL 118A	OL 23	41.3363	0.0544	10.678	0.1584	47.8295	0.2485	0.07	0.2877	100.66	88.1819
XAL 118A	OL 24	40.789	0.0619	11.3614	0.1317	47.4693	0.2297	0.059	0.302	100.401	88.9354
XAL 118A	OL 24	40.7391	0.0483	10.528	0.1454	47.964	0.2569	0.0605	0.3162	100.065	89.264
XAL 118A	OL 24	41.3061	0.0782	10.2947	0.1635	47.5821	0.2707	0.0476	0.2997	100.071	89.2087
XAL 118A	OL 24	40.9374	0.056	10.2978	0.1615	48.3319	0.2673	0.0541	0.2893	100.419	89.3934
XAL 118A	OL 24	40.7753	0.0511	10.1996	0.1258	48.3824	0.2314	0.0599	0.3224	100.149	89.5007
XAL 118A	OL 24	41.0053	0.0783	10.1524	0.1597	48.4033	0.2785	0.0633	0.3275	100.493	89.4858
XAL 118A	OL 24	40.8096	0.0691	10.1037	0.1483	48.3692	0.2584	0.0577	0.2819	100.114	89.4628
XAL 118A	OL 24	40.6209	0.0668	10.1217	0.1494	48.2349	0.2515	0.043	0.3241	99.8121	89.3891
XAL 118A	OL 24	40.8336	0.0657	10.2542	0.1451	48.4043	0.228	0.0457	0.3221	100.307	89.3353
XAL 118A	OL 24	40.7321	0.0446	10.2681	0.1339	48.2194	0.2382	0.0386	0.3299	100.012	89.3145
XAL 118A	OL 24	40.6681	0.052	10.2838	0.1415	48.2691	0.2446	0.0607	0.2902	100.014	89.3969
XAL 118A	OL 24	40.71	0.0442	10.1894	0.1439	48.123	0.2395	0.0661	0.2867	99.8284	89.4453
XAL 118A	OL 24	40.8329	0.0604	10.1476	0.1352	48.2546	0.2652	0.0421	0.3182	100.047	89.3736
XAL 118A	OL 24	40.6112	0.0456	10.1873	0.13	48.0703	0.2497	0.0552	0.3246	99.7027	89.377
XAL 118A	OL 24	40.6533	0.0619	10.2119	0.1337	48.2603	0.2502	0.0742	0.2962	99.9625	88.7321
XAL 118A	OL 25	41.3128	0.1363	10.9627	0.1644	47.44	0.2563	0.0487	0.2748	100.62	88.6115
XAL 118A	OL 25	41.2726	0.0618	10.8597	0.1493	47.5398	0.2551	0.0429	0.2992	100.497	88.5149
XAL 118A	OL 25	41.1646	0.0486	10.9755	0.1516	47.4608	0.2523	0.0491	0.2311	100.338	88.3542
XAL 118A	OL 25	41.2755	0.0528	11.1549	0.1642	47.2677	0.2542	0.0433	0.2198	100.448	88.2559
XAL 118A	OL 25	41.2134	0.0582	11.1926	0.1532	47.1319	0.2522	0.0395	0.2312	100.299	88.2553
XAL 118A	OL 25	41.1834	0.0493	11.1783	0.1705	47.1606	0.2538	0.019	0.2477	100.278	88.4536
XAL 118A	OL 25	41.4774	0.0653	11.0074	0.1827	47.2371	0.2467	0.0327	0.2186	100.49	88.5483
XAL 118A	OL 25	41.269	0.0731	10.8428	0.1643	47.081	0.2639	0.0544	0.2401	100.021	88.7062
XAL 118A	OL 25	41.4397	0.0406	10.7169	0.1365	47.2956	0.2539	0.081	0.2544	100.245	88.3528
XAL 118A	OL 25	41.4417	0.0555	11.1288	0.1334	47.2404	0.2319	0.0313	0.2685	100.528	87.28
XAL 118A	OL 26	41.0885	0.0554	12.2171	0.1745	46.5558	0.2042	0.0277	0.2568	100.578	87.3255
XAL 118A	OL 26	41.0737	0.0638	12.0561	0.1607	46.7514	0.1999	0.0123	0.253	100.583	87.3781
XAL 118A	OL 26	40.9442	0.0431	12.0066	0.1829	46.6371	0.215	0.0424	0.2498	100.332	87.441
XAL 118A	OL 26	41.0576	0.0444	11.9525	0.1771	46.6645	0.1851	0.0177	0.2861	100.403	87.366
XAL 118A	OL 26	41.1233	0.0351	12.0574	0.1509	46.7866	0.1975	0.0317	0.2532	100.652	87.4856
XAL 118A	OL 26	41.0232	0.0357	11.9248	0.1605	46.8953	0.1975	0.0349	0.2927	100.572	87.4466
XAL 118A	OL 26	41.1703	0.0421	12.0269	0.1793	46.9253	0.179	0.0057	0.2821	100.812	87.4075
XAL 118A	OL 26	41.0444	0.0516	12.0381	0.1535	46.9024	0.1986	0.0239	0.2896	100.723	87.489
XAL 118A	OL 26	41.209	0.0851	11.9628	0.199	46.7732	0.2022	0.0337	0.2934	100.769	87.5045
XAL 118A	OL 26	41.0612	0.0837	11.8897	0.1724	46.8794	0.1899	0.0175	0.2676	100.574	87.6242
XAL 118A	OL 26	41.2049	0.0629	11.8325	0.1477	47.0188	0.1795	0.0515	0.2771	100.792	87.5458
XAL 118A	OL 26	41.0827	0.0689	11.8982	0.1838	46.8901	0.2086	0.0192	0.2706	100.627	87.5117
XAL 118A	OL 26	40.9824	0.0553	11.9026	0.1835	46.7617	0.2122	0.0475	0.2788	100.445	87.4785
XAL 118A	OL 26	41.0261	0.0463	11.9215	0.1634	46.6919	0.2079	0.0252	0.2766	100.349	87.4198
XAL 118A	OL 26	41.1707	0.0781	11.9963	0.1794	46.613	0.2023	0.0335	0.2497	100.529	87.478
XAL 118A	OL 26	41.1886	0.0902	11.8412	0.1654	46.2233	0.2263	0.0241	0.2705	100.048	87.4655
XAL 118A	OL 26	41.0847	0.068	11.852	0.173	46.6767	0.221	0.0415	0.2838	100.421	87.5776
XAL 118A	OL 26	41.0098	0.075	11.8173	0.173	46.8993	0.2147	0.0385	0.2825	100.52	87.6433
XAL 118A	OL 26	41.1906	0.0534	11.809	0.1768	46.9428	0.1791	0.0409	0.2698	100.684	87.6224
XAL 118A	OL 26	41.0102	0.059	11.8202	0.1759	47.0993	0.1999	0.0286	0.2842	100.693	87.3775
XAL 118A	OL 27	41.0924	0.0648	12.1147	0.1747	46.7298	0.2445	0.0158	0.2518	100.706	87.2987
XAL 118A	OL 27	40.873	0.0607	12.0724	0.1737	46.6248	0.2345	0.0404	0.222	100.306	87.4336
XAL 118A	OL 27	40.8766	0.0331	11.9548	0.1675	46.7546	0.261	0.043	0.2529	100.349	87.4515
XAL 118A	OL 27	40.9423	0.0631	11.9883	0.181	46.8824	0.2518	0.0229	0.2395	100.589	87.4338
XAL 118A	OL 27	40.9584	0.0564	12.0184	0.1729	46.9034	0.247	0.0403	0.2449	100.666	87.1482
XAL 118A	OL 27	40.9315	0.0746	12.2893	0.1653	46.4839	0.2353	0.0038	0.2439	100.451	87.3005
XAL 118A	OL 27	40.8953	0.0465	12.0428	0.1491	46.5982	0.247	0.0362	0.2372	100.257	87.3019
XAL 118A	OL 27	41.1565	0.0437	12.155	0.1646	46.8106	0.2673	0.054	0.2274	100.896	86.9879
XAL 118A	OL 28	40.8222	0.0474	12.3772	0.1659	46.255	0.2552	0.0236	0.2152	100.172	86.8783
XAL 118A	OL 28	40.7324	0.0437	12.453	0.1543	46.3326	0.2448	0.0258	0.1812	100.181	86.8731
XAL 118A	OL 28	40.6793	0.0491	12.4436	0.1525	46.0933	0.252	0.0243	0.1884	99.9081	86.9299
XAL 118A	OL 28	40.9157	0.0561	12.3932	0.1869	46.1494	0.25	0.0174	0.222	100.212	86.8815
XAL 118A	OL 28	40.7256	0.0548	12.3931	0.1811	46.1381	0.236	0.0249	0.2376	99.9945	86.8734
XAL 118A	OL 28	40.9708	0.0577	12.4772	0.1668	46.2239	0.2388	0.0316	0.2169	100.398	86.77
XAL 118A	OL 28	40.8945	0.0347	12.5686	0.1572	46.3161	0.224	0.0317	0.2344	100.48	86.8727
XAL 118A	OL 28	40.9943	0.0465	12.4546	0.2102	46.0629	0.2492	0.0309	0.2089	100.287	87.2429
XAL 118A	OL 28	40.9966	0.0364	12.0117	0.1937	46.3722	0.2466	0.0093	0.261	100.135	88.4072
XAL 118A	OL 29	41.2487	0.0366	10.9329	0.1666	47.5288	0.2499	0.0492	0.2825	100.488	88.7234
XAL 118A	OL 29	41.3335	0.0485	10.7858	0.1732	47.6426	0.2656	0.0496	0.2703	100.586	88.5361
XAL 118A	OL 29	41.4468	0.0574	11.0133	0.1424	47.5573	0.2463	0.0638	0.2769	100.821	88.2923
XAL 118A	OL 29	41.4265	0.071	11.2311	0.1738	47.3696	0.2658	0.0358	0.237	100.822	88.1337
XAL 118A	OL 29	41.3601	0.0873	11.3455	0.1587	47.1547	0.2598	0.0396	0.2585	100.678	88.0259
XAL 118A	OL 29	41.3384	0.054	11.4313	0.1435	47.1629	0.2413	0.0303	0.2593	100.677	87.999
XAL 118A	OL 29	41.3117	0.0324	11.4419	0.1383	47.0221	0.2537	0.0384	0.2137	100.468	88.2211
XAL 118A	OL 29	41.2839	0.0489	11.1927	0.1339	47.175	0.2526	0.0158	0.2537	100.379	88.3285
XAL 118A	OL 29	41.6133	0.0506	11.1793	0.1577	47.4171	0.2687	0.0244	0.2485	100.96	88.4195
XAL 118A	OL 29	41.4659	0.0511	11.0559	0.1592	47.5015	0.2382	0.0169	0.2903	100.792	87.7413
XAL 118A	OL 30	41.0663	0.0509	11.7482	0.1888	46.8677	0.2427	0.0185	0.1743	100.4	87.4274
XAL 118A	OL 30	41.1573	0.0592	12.0107	0.1853	46.6232	0.2147	0.0379	0.1596	100.471	87.1602
XAL 118A	OL 30	41.2122	0.0429	12.2564	0.1862	46.5991	0.217	-0.0132	0.1375	100.653	86.3724
XAL 118A	OL 30	41.1777	0.0545	13.0909	0.198	46.0268	0.206	0.011	0.1348	100.921	85.9761
XAL 118A	OL 30	40.9105	0.0359	13.3202	0.1772	45.7528	0.2098	0.0273	0.1072	100.562	86.4564
XAL 118A	OL 30	41.038	0.0464	12.7959	0.1811	46.06	0.1872	0.0363	0.1238	100.48	87.0099
XAL 118A	OL 30	41.222	0.0384	12.2953	0.1656	46.4399	0.1982	0.0049	0.1715	100.561	87.7735
XAL 118A	OL 30	41.2506	0.7071	11.5173	0.1925	45.8457	0.3795	0.0926	0.1874	100.216	88.2474
XAL 118A	OL 30	41.3284	0.071	10.9564	0.1612	47.4992	0.2387	0.0202	0.2609	100.544	85.4698
XAL 118A	OL 31	40.6021	0.0415	14.1803	0.1706	45.0596	0.2381	0.0206	0.1999	100.513	84.1748
XAL 118A	OL 31	40.3641	0.03	15.0233	0.1765	44.3904	0.1946	0.0232	0.1763	100.379	83.2495
XAL 118A	OL 31	40.4271	0.024	15.9528	0.2403	43.9865	0.1764	0.007	0.169	100.983	82.8081
XAL 118A	OL 31	39.9444	0.0316	16.1189	0.2256	43.4747	0.1625	0.0201	0.1385	100.116	82.9131
XAL 118A	OL 31	40.2366	0.0493	16.033	0.2098	43.5769	0.1703	0.0093	0.1494	100.435	83.1963
XAL 118A	OL 31	40.2985	0.0344	15.7439	0.2455	43.9799	0.1804	0.0105	0.1627	100.656	83.9757
XAL 118A	OL 31	40.5613	0.0426	15.0051	0.1772	44.4315	0.1951	0.0131	0.1647	100.591	85.3433
XAL 118A	OL 31	40.3296	0.0368	13.6145	0.2011	45.4567	0.2679	0.0148	0.1855	100.107	85.8048
XAL 118A	OL 31	40.7536	0.0395	13.4874	0.1513	45.7575	0.235	-0.0055	0.1547	100.573	85.0764
XAL 118A	OL 31	40.4641	0.029	14.2388	0.292	45.1018	0.2083	0.0034	0.1761	100.513	84.6918
XAL 118A	OL 31	40.5643	0.0296	14.4793	0.223	44.6032	0.1782	0.0022	0.1432	100.223	84.7043
XAL 118A	OL 31	40.6805	0.0303	14.4256	0.2578	44.8902	0.228	0.0133	0.1583	100.684	84.7587
XAL 118A	OL 31	40.6813	0.0382	14.3836	0.2806	44.8568	0.1944	0.0289	0.1782	100.642	84.738
XAL 118A	OL 31	40.7601	0.0225	14.4256	0.2244	44.9812	0.1796	0.0178	0.1713	100.783	84.766
XAL 118A	OL 31	40.6871	0.0415	14.3946	0.1706	44.9729	0.2096	0.0104	0.1549	100.642	85.6526
XAL 118A	OL 31	40.9157	0.0376	13.4713	0.1595	45.5287	0.2461	0.0073	0.1885	100.555	83.9023
XAL 118A	OL 32	41.2004	0.069	10.3855	0.144	48.1476	0.2703	0.0643	0.3179	100.6	89.335
XAL 118A	OL 32	41.1593	0.0781	10.2331	0.1494	48.1423	0.2426	0.0761	0.3104	100.411	89.3333
XAL 118A	OL 32	41.3081	0.0615	10.2648	0.1449	48.2108	0.2301	0.0567	0.2805	100.562	89.2952
XAL 118A	OL 32	41.1346	0.0825	10.3009	0.1304	48.2906	0.2574	0.0524	0.32	100.586	89.2697
XAL 118A	OL 32	40.9495	0.043	10.3168	0.1678	48.2339	0.2592	0.0408	0.3025	100.314	89.3837
XAL 118A	OL 32	41.1762	0.0617	10.2329	0.1301	48.2528	0.2665	0.0516	0.284	100.45	89.3329
XAL 118A	OL 32	40.9303	0.0569	10.2543	0.1213	48.3027	0.2673	0.048	0.3256	100.326	89.4111
XAL 118A	OL 32	41.0176	0.0554	10.1961	0.144	48.2648	0.243	0.0427	0.3085	100.28	89.3267
XAL 118A	OL 32	41.0791	0.0498	10.3135	0.1508	48.3924	0.2694	0.0837	0.3261	100.677	89.2825
XAL 118A	OL 32	41.0274	0.0462	10.3152	0.1648	48.0804	0.2673	0.06	0.3471	100.315	89.4205
XAL 118A	OL 32	40.9571	0.0397	10.1239	0.1296	48.1492	0.2464	0.0848	0.3184	100.05	89.3834
XAL 118A	OL 32	41.0042	0.0468	10.191	0.1411	48.0266	0.2451	0.0578	0.3219	100.048	89.3773
XAL 118A	OL 32	41.0482	0.0872	10.2146	0.1492	48.3114	0.2459	0.0488	0.3009	100.418	89.3822
XAL 118A	OL 32	40.9068	0.0505	10.1839	0.1551	48.0628	0.2669	0.061	0.2866	99.974	89.3066
XAL 118A	OL 32	41.0541	0.0487	10.2824	0.1654	48.1003	0.2276	0.051	0.3071	100.236	89.4747
XAL 118A	OL 32	41.49	0.2192	10.1595	0.1611	48.2587	0.2469	0.0292	0.2731	100.861	89.1272
XAL 118A	OL 32	41.1562	0.0715	10.4459	0.1432	48.0927	0.2839	0.0609	0.3297	100.574	89.2208
XAL 118A	OL 32	41.1511	0.062	10.3529	0.1881	48.1161	0.239	0.0706	0.3053	100.495	88.0846
XAL 118A	OL 33	41.243	0.0399	11.5624	0.1767	47.063	0.2688	0.0499	0.2734	100.674	87.7481
XAL 118A	OL 33	41.1597	0.0313	11.6864	0.1619	46.8352	0.276	0.0657	0.2746	100.513	88.0819
XAL 118A	OL 33	41.3786	0.3562	11.3137	0.1563	46.5963	0.3237	0.1286	0.2291	100.508	87.7832
XAL 118A	OL 33	41.2495	0.0605	11.5562	0.1738	46.9196	0.2472	0.0472	0.2905	100.57	87.911
XAL 118A	OL 33	41.3095	0.0577	11.4961	0.173	46.8924	0.256	0.0252	0.2515	100.471	87.6496
XAL 118A	OL 33	41.2351	0.0454	11.7748	0.1788	46.7851	0.2616	0.0526	0.2428	100.572	88.4331
XAL 118A	OL 34	41.1204	0.0548	10.9461	0.1596	47.6785	0.2352	0.0564	0.2854	100.547	88.7997
XAL 118A	OL 34	41.2165	0.0866	10.6163	0.1374	46.781	0.2541	0.0631	0.3066	99.4907	88.8314
XAL 118A	OL 34	41.0559	0.0573	10.5598	0.1638	47.7135	0.2498	0.0398	0.321	100.143	89.0067
XAL 118A	OL 34	41.327	0.0569	10.5438	0.1427	47.8037	0.2322	0.0661	0.293	100.475	89.06
XAL 118A	OL 34	41.4096	0.0617	10.4621	0.1435	47.7012	0.2442	0.0664	0.2983	100.393	89.0698
XAL 118A	OL 34	41.5227	0.0653	10.4499	0.1512	47.7379	0.2158	0.0547	0.3244	100.532	88.9754
XAL 118A	OL 34	41.1674	0.0598	10.5127	0.1614	47.7985	0.2214	0.0307	0.2942	100.262	88.9726
XAL 118A	OL 34	41.4094	0.0456	10.6081	0.1367	47.9445	0.251	0.034	0.2912	100.731	88.7602
XAL 118A	OL 34	41.4247	0.0648	10.813	0.1307	47.7021	0.2337	0.0589	0.2915	100.74	88.383
XAL 118A	OL 34	41.1121	0.0641	11.1396	0.1449	47.5017	0.2299	0.0469	0.3069	100.579	87.7424
XAL 118A	OL 35	41.2246	0.0561	11.6574	0.18	46.8145	0.2252	0.0325	0.2942	100.495	88.0705
XAL 118A	OL 35	41.3252	0.0549	11.3098	0.1625	46.9623	0.2345	0.0581	0.2764	100.389	88.1868
XAL 118A	OL 35	41.1274	0.0514	11.1868	0.1564	47.0148	0.235	0.0308	0.2904	100.101	88.2984
XAL 118A	OL 35	41.4034	0.0588	11.1635	0.141	47.2178	0.233	0.0538	0.2993	100.583	88.3586
XAL 118A	OL 35	41.3711	0.0461	11.0837	0.1656	47.2661	0.2218	0.0362	0.2986	100.496	88.3254
XAL 118A	OL 35	41.2449	0.0545	11.1382	0.1589	47.3481	0.2414	0.0645	0.2953	100.54	88.4256
XAL 118A	OL 35	41.3711	0.0548	11.0521	0.1704	47.3009	0.2503	0.0467	0.2731	100.535	88.2436
XAL 118A	OL 35	41.2831	0.0521	11.2322	0.1581	47.2828	0.2414	0.0471	0.3021	100.607	87.9085
XAL 118A	OL 35	41.2915	0.04	11.564	0.168	46.8774	0.2372	0.0418	0.2872	100.504	88.5327
XAL 118A	OL 37	41.5778	0.033	10.5884	0.1804	47.6162	0.2561	0.0619	0.292	100.629	88.9911
XAL 118A	OL 37	41.4822	0.0424	10.5216	0.1443	47.9694	0.2522	0.0424	0.2913	100.772	89.1031
XAL 118A	OL 37	41.4109	0.0509	10.4449	0.1481	47.945	0.2663	0.0394	0.2807	100.626	89.1245
XAL 118A	OL 37	41.2583	0.0239	10.3991	0.1733	47.8739	0.2571	0.0538	0.2913	100.343	89.1232
XAL 118A	OL 37	41.5085	0.067	10.4594	0.159	47.9887	0.2558	0.0413	0.2911	100.761	89.1054
XAL 118A	OL 37	42.1922	1.1333	10.3284	0.1547	45.0473	0.29	0.0559	0.2779	99.5317	88.3121
XAL 118A	OL 37	41.4812	0.0434	10.7384	0.1272	47.6538	0.2638	0.071	0.2862	100.673	88.8151
XAL 118A	OL 37	41.4627	0.042	10.6989	0.1436	47.7098	0.2622	0.0668	0.2829	100.668	88.9034
XAL 118A	OL 37	41.584	0.0581	10.6295	0.1737	47.7237	0.2482	0.0645	0.288	100.78	88.878
XAL 118A	OL 37	41.5901	0.0634	10.635	0.1419	47.6442	0.2346	0.0477	0.3015	100.672	88.8328
XAL 118A	OL 38	41.3586	0.0431	10.9152	0.1773	47.5743	0.2055	0.0511	0.2117	100.559	88.3435
XAL 118A	OL 38	41.2677	0.0329	11.172	0.1613	47.403	0.2327	0.0205	0.2088	100.507	88.1698
XAL 118A	OL 38	41.2565	0.0422	11.3298	0.1744	47.2278	0.2326	0.0085	0.2317	100.525	87.9923
XAL 118A	OL 38	40.9827	0.0586	11.4031	0.2034	46.7227	0.1961	0.0511	0.2037	99.8557	87.7825
XAL 118A	OL 38	41.0067	0.0483	11.6374	0.1856	46.9891	0.1968	0.0361	0.1829	100.305	87.6671
XAL 118A	OL 38	41.3079	0.0477	11.8175	0.1701	46.8985	0.1976	0.0256	0.1587	100.632	87.4431
XAL 118A	OL 38	41.1677	0.0447	11.9675	0.1713	46.6264	0.2211	0.0311	0.1788	100.417	87.5093
XAL 118A	OL 38	41.2513	0.0428	11.8654	0.1765	46.6203	0.1928	0.0363	0.1685	100.381	87.4897
XAL 118A	OL 38	41.3093	0.045	11.921	0.2133	46.7987	0.2204	0.0371	0.1727	100.73	87.3911
XAL 118A	OL 38	41.1063	0.0457	12.0156	0.2009	46.8213	0.2171	0.0229	0.1404	100.582	87.4954
XAL 118A	OL 38	41.2665	0.0377	11.9454	0.1574	46.8576	0.206	-0.0045	0.1843	100.679	87.5161
XAL 118A	OL 38	41.1868	0.0413	11.8945	0.1493	46.7895	0.1936	0.0232	0.1859	100.497	87.6089
XAL 118A	OL 38	41.3233	0.0368	11.8376	0.1728	47.0199	0.2176	0.0197	0.1677	100.803	87.884
XAL 118A	OL 38	41.2275	0.0392	11.5336	0.1715	47.1122	0.2089	0.0137	0.1772	100.492	86.5851
XAL 118A	OL 39	41.07	0.0517	12.2624	0.1757	46.4735	0.2549	0.043	0.2513	100.597	87.0641
XAL 118A	OL 39	41.209	0.0563	12.2913	0.184	46.1867	0.2652	0.024	0.2361	100.467	86.8852
XAL 118A	OL 39	41.0241	0.0439	12.3983	0.1872	46.1268	0.2496	0.0064	0.2334	100.28	86.7803
XAL 118A	OL 39	41.212	0.0688	12.5722	0.1863	46.1326	0.2784	-0.0011	0.2407	100.722	87.0889
XAL 118A	OL 39	41.2314	0.0617	12.1794	0.1684	46.2622	0.2438	0.0343	0.2519	100.451	87.2125
XAL 118A	OL 39	41.2261	0.053	12.1291	0.1675	46.5834	0.2574	0.0524	0.2501	100.729	86.9529
XAL 118A	OL 39	41.1431	0.0476	12.3985	0.1999	46.042	0.2524	0.041	0.2403	100.385	86.7788
XAL 118A	OL 39	41.0975	0.073	12.528	0.162	46.2205	0.2504	0.029	0.2358	100.594	86.8523
XAL 118A	OL 39	41.001	0.0553	12.4228	0.1616	45.9989	0.2548	0.0422	0.2265	100.172	88.4226
XAL 118A	OL 40	41.1411	0.0531	10.7023	0.1121	46.5047	0.2684	0.0485	0.3075	99.1377	88.8263
XAL 118A	OL 40	41.3446	0.1039	10.6253	0.1945	48.0373	0.2536	0.0587	0.3065	100.924	88.9177
XAL 118A	OL 40	40.9068	0.0914	10.5816	0.1514	47.7317	0.2537	0.0534	0.2914	100.061	89.0035
XAL 118A	OL 40	41.37	0.0502	10.5997	0.2015	48.0621	0.2419	0.0528	0.3062	100.884	89.0648
XAL 118A	OL 40	41.259	0.065	10.5046	0.207	48.0671	0.2488	0.0514	0.3215	100.724	88.9786
XAL 118A	OL 40	41.2209	0.0667	10.5781	0.1665	47.7666	0.2469	0.057	0.3157	100.418	88.7119
XAL 118A	OL 40	41.1791	0.0705	10.8614	0.2043	47.8492	0.25	0.0606	0.3284	100.803	86.9821
XAL 118A	OL 40	40.8928	0.0408	12.6858	0.1636	46.6273	0.23	0.0328	0.2754	100.948	85.727
XAL 118A	OL 41	40.8936	0.0453	12.7513	0.1583	46.2427	0.2204	0.0315	0.2551	100.598	87.8782
XAL 118A	OL 41	41.0677	0.026	11.4272	0.1959	47.221	0.2525	0.0622	0.2852	100.538	88.3786
XAL 118A	OL 41	41.2822	0.0441	11.126	0.162	47.6947	0.2353	0.0501	0.2766	100.871	88.0729
XAL 118A	OL 41	40.9858	0.056	11.452	0.1465	47.2838	0.2414	0.0412	0.2999	100.507	88.0326
XAL 118A	OL 41	40.8654	0.0403	11.4056	0.1364	47.0238	0.2432	0.0319	0.2881	100.035	85.2991
XAL 118A	OL 41	40.2325	0.046	14.2941	0.232	45.0159	0.2289	0.0613	0.2003	100.311	86.1705
XAL 118A	OL 42	41.1272	0.056	10.3378	0.1835	48.2238	0.274	0.0375	0.2837	100.523	89.2239
XAL 118A	OL 42	41.3205	0.0697	10.3949	0.0879	48.1599	0.2627	0.0437	0.2829	100.622	89.2441
XAL 118A	OL 42	41.4094	0.052	10.3402	0.1621	48.0054	0.2736	0.0462	0.2833	100.572	89.2121
XAL 118A	OL 42	41.3206	0.1041	10.3024	0.1715	47.6251	0.2646	0.0648	0.2903	100.144	89.1928
XAL 118A	OL 42	41.3371	0.044	10.3529	0.1371	48.2855	0.2604	0.0484	0.2988	100.764	89.2132
XAL 118A	OL 42	41.4322	0.0896	10.3999	0.1533	48.0189	0.2687	0.0656	0.3114	100.74	88.5083
XAL 118A	OL 43	40.2218	0.0383	13.4377	0.2533	45.0486	0.2586	0.0343	0.2291	99.5216	85.5995
XAL 118A	OL 43	40.5279	0.0074	13.5983	0.1594	45.3826	0.2333	0.0322	0.2035	100.144	85.754
XAL 118A	OL 43	40.7947	0.0353	13.5157	0.2388	45.6543	0.1973	0.0169	0.2139	100.667	85.4813
XAL 118A	OL 43	40.8162	0.037	13.8371	0.1526	45.6415	0.1871	-0.0055	0.1796	100.846	85.4768
XAL 118A	OL 43	40.4693	0.0423	13.6852	0.1879	45.055	0.2004	0.0303	0.2002	99.8705	85.4331
XAL 118A	OL 43	40.5171	0.0176	13.722	0.1674	45.2334	0.1906	0.006	0.2073	100.061	85.5776
XAL 118A	OL 43	40.7147	0.0116	13.6599	0.2059	45.5041	0.252	0.029	0.1731	100.55	88.7589
XAL 118A	OL 44	41.4807	0.045	10.4672	0.128	48.0799	0.2498	0.0512	0.3152	100.817	89.2384
XAL 118A	OL 44	41.1217	0.0452	10.2737	0.0996	47.9862	0.2653	0.0532	0.2974	100.142	89.0356
XAL 118A	OL 44	41.1895	0.0474	10.5555	0.2318	47.8762	0.251	0.0574	0.3171	100.526	88.9627
XAL 118A	OL 44	41.0371	0.0423	10.5776	0.1458	47.9948	0.2567	0.0428	0.2913	100.388	88.9115
XAL 118A	OL 44	40.9648	0.0507	10.6227	0.1048	47.6381	0.2574	0.0437	0.2812	99.9635	88.8204
XAL 118A	OL 44	41.597	0.0812	10.7933	0.1145	47.8025	0.2651	0.0367	0.282	100.972	88.745
XAL 118A	OL 44	41.0618	0.0511	10.7238	0.1885	47.6301	0.2658	0.037	0.2754	100.234	88.7118
XAL 118A	OL 44	40.9013	0.0466	10.7721	0.1343	47.5286	0.2549	0.0392	0.2725	99.9494	88.9084
XAL 118A	OL 44	41.1749	0.0352	10.6339	0.2239	47.8521	0.252	0.06	0.2822	100.514	89.0881
XAL 118A	OL 44	41.2297	0.4208	10.423	0.1911	47.1424	0.4234	0.1467	0.2832	100.26	88.5335
XAL 118A	OL 45	40.9729	0.0607	11.0179	0.2143	47.2553	0.2438	0.0482	0.2807	100.094	89.182
XAL 118A	OL 45	41.3676	0.0472	10.3217	0.1495	48.2715	0.2385	0.0415	0.2837	100.721	89.1229
XAL 118A	OL 45	41.1005	0.0165	10.4591	0.1888	48.1262	0.2203	0.0336	0.2314	100.376	89.0742
XAL 118A	OL 45	41.088	0.0542	10.5213	0.169	48.0301	0.2397	0.0355	0.2665	100.404	89.2608
XAL 118A	OL 45	41.0327	0.0407	10.2777	0.1388	48.0204	0.2631	0.0372	0.2672	100.078	88.4037
XAL 118A	OL 45	41.407	0.0529	11.2792	0.1901	47.4577	0.2586	0.0528	0.2807	100.979	85.7333
XAL 118A	OL 46	40.0665	0.0472	16.982	0.2129	42.7634	0.2225	0.0153	0.0888	100.399	81.3327
XAL 118A	OL 46	39.8277	0.0401	17.4583	0.3156	42.5119	0.1995	-0.0024	0.0914	100.442	81.292
XAL 118A	OL 46	39.5667	0.0424	17.3536	0.293	42.3643	0.204	0.0142	0.105	99.9433	81.3836
XAL 118A	OL 46	39.922	0.021	17.3511	0.2967	42.4431	0.2063	0.0114	0.0916	100.343	81.3801
XAL 118A	OL 46	39.9012	0.0029	17.3555	0.2533	42.7494	0.2094	0.0061	0.082	100.56	81.9138
XAL 118A	OL 46	39.7494	0.0192	16.7372	0.2889	42.7086	0.2194	0.0057	0.0966	99.8248	81.7351
XAL 118A	OL 46	39.7074	0.0353	17.049	0.2664	42.6677	0.292	0.0253	0.1647	100.208	85.4698
XAL 118A	OL 47	40.9619	0.0371	11.132	0.2199	47.5136	0.2507	0.0407	0.2716	100.427	88.9028
XAL 118A	OL 47	41.1407	0.0805	10.6155	0.157	47.9922	0.2562	0.0468	0.2877	100.577	88.9731
XAL 118A	OL 47	41.4769	0.0583	10.5859	0.1181	47.5522	0.2623	0.0361	0.3107	100.4	88.9487
XAL 118A	OL 47	41.5457	0.0634	10.5708	0.1682	47.8095	0.2499	0.0554	0.3152	100.778	89.0097
XAL 118A	OL 47	41.0825	0.0475	10.4195	0.1192	47.4845	0.253	0.052	0.2704	99.7286	88.9858
XAL 118A	OL 47	40.9677	0.0627	10.4658	0.1945	47.4138	0.2463	0.0476	0.2887	99.6872	85.837
XAL 118A	OL 48	41.1944	0.0479	11.1432	0.1302	47.4597	0.2632	0.039	0.2949	100.573	88.4315
XAL 118A	OL 48	41.0817	0.053	11.0465	0.1895	47.4024	0.2453	0.0453	0.323	100.387	88.5131
XAL 118A	OL 48	41.1141	0.0725	10.949	0.1943	47.2831	0.2546	0.0453	0.2576	100.17	87.3022
XAL 118A	OL 48	40.8641	0.0711	12.2092	0.1984	46.4401	0.2356	0.0339	0.2939	100.346	87.7778
XAL 118A	OL 49	40.6743	0.0451	12.2524	0.1937	46.5776	0.2568	0.0216	0.2479	100.269	87.2316
XAL 118A	OL 49	40.7658	0.0464	12.1633	0.1781	46.5813	0.2687	0.0543	0.2688	100.327	87.1742
XAL 118A	OL 49	40.6928	0.0625	12.1765	0.2437	46.3125	0.2542	0.0492	0.2334	100.025	87.1527
XAL 118A	OL 49	40.5059	0.0571	12.1287	0.1269	46.2971	0.2331	0.0349	0.2475	99.6312	87.3382
XAL 118A	OL 49	40.7905	0.065	12.0523	0.1437	46.6965	0.2639	0.0317	0.2713	100.315	86.2538
XAL 118A	OL 49	40.6446	0.0517	13.1748	0.2403	45.5563	0.2505	0.0405	0.2096	100.168	88.2712
XAL 118A	OL 50	40.8463	0.0844	10.9919	0.1006	47.1417	0.2415	0.0372	0.2773	99.721	88.6602
XAL 118A	OL 50	41.0597	0.0636	10.7716	0.1751	47.2593	0.2161	0.0327	0.2767	99.8548	87.8559
XAL 118A	OL 50	41.0461	0.0647	11.6618	0.1847	46.8681	0.2474	0.0392	0.2957	100.408	88.3818
XAL 118A	OL 51	40.8953	0.0721	10.9023	0.1784	46.76	0.2424	0.0524	0.2875	99.3905	88.7634
XAL 118A	OL 51	40.9971	0.0529	10.6056	0.1865	47.3017	0.2677	0.0591	0.2837	99.7543	88.7775
XAL 118A	OL 51	41.264	0.0581	10.7094	0.1886	47.4208	0.2475	0.0508	0.3157	100.255	88.9868
XAL 118A	OL 51	40.7478	0.4601	10.4937	0.2113	47.9612	0.2653	0.0546	0.2553	100.449	87.0529
XAL 118A	OL 51	41.1033	0.0299	12.6372	0.2674	46.2232	0.2527	0.0398	0.2579	100.811	88.7396
XAL 118A	OL 52	41.0839	0.0495	11.6415	0.2021	47.2213	0.2262	0.0653	0.2911	100.781	87.2899
XAL 118A	OL 52	41.154	0.0519	12.2196	0.1833	46.5906	0.2484	0.0286	0.2226	100.699	86.4718
XAL 118A	OL 52	40.9773	0.0719	12.9776	0.1558	46.2237	0.2435	0.0279	0.2307	100.908	86.6118
XAL 118A	OL 52	40.7827	0.1449	12.643	0.1896	45.8165	0.2499	0.0338	0.2135	100.074	87.5137
XAL 118A	OL 52	41.2808	0.0565	11.7837	0.1553	46.9553	0.238	0.0299	0.2563	100.756	86.7887
XAL 118A	OL 52	41.0445	0.0696	12.648	0.1801	45.9827	0.2374	0.0326	0.2493	100.444	87.0725
XAL 118A	OL 52	40.9541	0.051	12.202	0.223	46.5498	0.2407	0.0393	0.2731	100.533	87.8836
XAL 118A	OL 52	41.1043	0.0402	11.4293	0.1131	46.8058	0.2511	0.0308	0.2854	100.06	87.5891
XAL 118A	OL 53	40.8678	0.0398	13.6131	0.2278	45.3992	0.2394	0.0318	0.2234	100.642	88.7106
XAL 118A	OL 53	41.5453	0.0361	10.4494	0.1699	47.825	0.2679	0.0521	0.319	100.665	89.0756
XAL 118A	OL 53	41.2099	0.067	10.4075	0.1721	47.7067	0.2616	0.0699	0.3184	100.213	88.7923
XAL 118A	OL 53	41.2934	0.0412	10.7528	0.1201	47.6652	0.2535	0.064	0.3049	100.495	88.8219
XAL 118A	OL 54	41.0146	0.0532	10.8235	0.1745	47.7703	0.2621	0.0779	0.3144	100.49	88.9215
XAL 118A	OL 54	41.46	0.354	10.6427	0.1768	47.3544	0.3389	0.1098	0.3082	100.745	88.4037
XAL 118A	OL 54	41.3463	0.0476	11.0863	0.1356	47.7681	0.2689	0.0437	0.2902	100.987	87.7466
XAL 118A	OL 55	40.9283	0.0644	11.7508	0.1078	46.7859	0.2541	0.0456	0.3056	100.242	87.849
XAL 118A	OL 55	40.6851	0.0646	11.4594	0.1212	46.5756	0.247	0.0437	0.286	99.4826	88.024
XAL 118A	OL 55	41.1359	0.0848	11.4216	0.1846	47.1184	0.2651	0.0422	0.3015	100.554	88.0276
XAL 118A	OL 55	41.0697	0.0724	11.4045	0.166	47.0561	0.2466	0.055	0.3151	100.385	87.9584
XAL 118A	OL 55	41.2357	0.0911	11.5282	0.1793	47.1623	0.2627	0.0454	0.3089	100.814	87.8299
XAL 118A	OL 55	40.7472	0.0547	11.4873	0.1114	46.4545	0.2488	0.0449	0.2677	99.4164	87.523
XAL 118A	OL 55	41.1826	0.0525	11.9673	0.2061	46.9964	0.2553	0.0361	0.2646	100.961	87.5953
XAL 118A	OL 55	40.8426	0.0364	11.7436	0.1908	46.5343	0.2335	0.0287	0.2766	99.8865	87.5851
XAL 118A	OL 55	40.942	0.0657	11.8118	0.1839	46.7865	0.2439	0.0483	0.2716	100.354	87.5758
XAL 118A	OL 55	40.9848	0.0442	11.8361	0.2165	46.7577	0.2333	0.0453	0.3038	100.422	87.6015
XAL 118A	OL 56	41.0159	0.0745	11.8738	0.1277	46.8172	0.2501	0.0342	0.3203	100.514	87.6521
XAL 118A	OL 56	41.2176	0.0721	11.6793	0.1759	46.0877	0.2526	0.0333	0.2884	99.8069	87.5674
XAL 118A	OL 56	41.0204	0.0813	11.696	0.1843	46.5217	0.2522	0.0437	0.2723	100.072	87.5609
XAL 118A	OL 56	41.2796	0.0696	11.8716	0.1825	46.9132	0.2489	0.0332	0.273	100.871	87.6298
XAL 118A	OL 56	41.0276	0.0672	11.7399	0.1493	46.7273	0.2408	0.0301	0.2971	100.279	87.6816
XAL 118A	OL 56	41.0155	0.0755	11.6857	0.1766	46.5999	0.2517	0.0433	0.2876	100.136	87.9951
XAL 118A	OL 57	40.9055	0.0659	11.292	0.1618	46.9035	0.2484	0.0515	0.303	99.9315	88.459
XAL 118A	OL 57	41.1235	0.0748	10.952	0.1616	47.2559	0.2594	0.0464	0.2785	100.152	88.4654
XAL 118A	OL 57	41.1724	0.0434	11.0086	0.1584	47.4311	0.2692	0.0301	0.2767	100.39	88.5751
XAL 118A	OL 57	41.212	0.0641	10.883	0.1602	47.2483	0.258	0.0421	0.2641	100.132	88.3314
XAL 118A	OL 57	40.9144	0.045	11.114	0.1853	47.321	0.2469	0.0467	0.2738	100.147	88.3491
XAL 118A	OL 57	41.059	0.0245	11.1559	0.0838	47.5285	0.2517	0.0317	0.2378	100.373	88.4131
XAL 118A	OL 57	41.1308	0.0541	11.097	0.1466	47.3337	0.2588	0.042	0.2812	100.344	88.4689
XAL 118A	OL 57	40.9176	0.0488	10.9481	0.209	47.1783	0.2547	0.0397	0.2784	99.8747	88.3847
XAL 118A	OL 57	41.2939	0.0632	11.1219	0.1617	47.3011	0.246	0.0445	0.3084	100.541	88.6409
XAL 118A	OL 58	41.16	0.0571	11.1908	0.1629	46.9974	0.2543	0.0328	0.2549	100.11	88.2302
XAL 118A	OL 58	41.2019	0.0472	11.1917	0.1546	47.0983	0.2619	0.038	0.2539	100.248	88.0118
XAL 118A	OL 58	40.9818	0.0564	11.3819	0.1835	46.741	0.254	0.0272	0.2734	99.8992	87.8588
XAL 118A	OL 58	41.1012	0.0313	11.5404	0.1286	46.7994	0.2547	0.0291	0.2828	100.168	87.917
XAL 118A	OL 58	40.9207	0.0636	11.4451	0.2178	46.8029	0.2533	0.0418	0.233	99.9782	88.9779
XAL 118B	OL 1	41.155	0.0481	12.5779	0.1952	45.7749	0.2546	0.0158	0.2335	100.255	86.6442
XAL 118B	OL 1	40.9949	0.055	12.9587	0.2312	45.0701	0.266	0.0435	0.2014	99.8209	86.1107
XAL 118B	OL 1	40.8087	0.1021	13.5977	0.1495	45.509	0.2287	0.0317	0.2276	100.655	85.6446
XAL 118B	OL 2	40.898	0.0635	12.7034	0.1799	46.1219	0.2495	0.0116	0.2111	100.439	86.6165
XAL 118B	OL 2	40.9842	0.059	12.7883	0.1727	45.9986	0.2456	0.0152	0.2192	100.483	86.5081
XAL 118B	OL 2	40.4442	0.0365	14.2569	0.2014	44.5685	0.2515	0.0168	0.2099	99.9858	84.785
XAL 118B	OL 3	41.1622	0.0466	11.6546	0.1704	46.8056	0.2226	0.067	0.2559	100.39	87.7436
XAL 118B	OL 3	41.1315	0.0853	11.6535	0.1615	46.5774	0.2528	0.1587	0.2627	100.324	87.692
XAL 118B	OL 3	41.1898	0.038	11.8566	0.1737	46.7906	0.2321	0.0593	0.2668	100.608	87.5541
XAL 118B	OL 3	41.0286	0.0414	11.8769	0.2311	46.6426	0.2149	0.0901	0.253	100.397	87.5008
XAL 118B	OL 3	40.9842	0.0495	12.1341	0.1799	46.4439	0.2176	0.0436	0.2632	100.34	87.2171
XAL 118B	OL 3	40.8506	0.0578	12.1505	0.2	46.4428	0.2511	0.0691	0.253	100.285	87.2018
XAL 118B	OL 3	41.1028	0.0446	12.1645	0.1761	46.3771	0.2511	0.0469	0.2515	100.429	87.1731
XAL 118B	OL 3	40.8897	0.0483	12.3055	0.1903	46.1238	0.2598	0.0721	0.2656	100.171	86.9817
XAL 118B	OL 3	40.9883	0.0444	13.2207	0.1926	45.442	0.2531	0.0056	0.2071	100.372	85.969
XAL 118B	OL 3	40.4935	0.0429	15.5658	0.2598	43.5737	0.2556	0.0278	0.2041	100.457	83.3057
XAL 118B	OL 4	41.4151	0.0739	10.2188	0.1597	48.2604	0.2706	0.0671	0.3102	100.779	89.3826
XAL 118B	OL 4	41.3673	0.0845	10.3122	0.1798	48.1458	0.2694	0.0577	0.2914	100.708	89.2733
XAL 118B	OL 4	41.3998	0.0531	10.3747	0.1238	48.072	0.2687	0.0486	0.3012	100.655	89.2006
XAL 118B	OL 4	41.3532	0.0776	10.4928	0.1086	48.2052	0.2592	0.0389	0.314	100.851	89.1179
XAL 118B	OL 4	41.3697	0.0748	10.4007	0.1502	47.6642	0.2873	0.0565	0.2818	100.309	89.0941
XAL 118B	OL 4	41.3037	0.071	10.4709	0.1484	47.9754	0.2528	0.0845	0.3202	100.635	89.0918
XAL 118B	OL 4	41.3607	0.0735	10.5113	0.1747	48.0989	0.2717	0.0528	0.2851	100.831	89.0795
XAL 118B	OL 4	41.1226	0.1505	10.4639	0.1424	47.778	0.2826	0.0669	0.2957	100.314	89.0581
XAL 118B	OL 4	41.4318	0.048	10.5796	0.1426	47.8879	0.2666	0.0354	0.2941	100.692	88.973
XAL 118B	OL 4	41.2844	0.0669	10.672	0.1593	47.7237	0.2608	0.0678	0.316	100.555	88.8536
XAL 118B	OL 4	40.6618	0.4597	10.485	0.1668	46.8062	0.2884	0.1063	0.3151	99.3066	88.8362
XAL 118B	OL 4	41.3389	0.0738	11.0261	0.138	47.6731	0.2951	0.0544	0.3008	100.905	88.5153
XAL 118B	OL 4	41.2336	0.0588	11.0467	0.1521	47.5512	0.2712	0.0139	0.2779	100.605	88.4704
XAL 118B	OL 5	41.524	0.0686	10.3364	0.1499	47.7344	0.279	0.0632	0.2835	100.459	89.1684
XAL 118B	OL 5	41.4607	0.0749	10.4771	0.1445	48.1551	0.2846	0.0442	0.2564	100.895	89.1223
XAL 118B	OL 5	41.4752	0.0804	10.343	0.1542	47.4906	0.2678	0.05	0.3129	100.169	89.1125
XAL 118B	OL 5	41.4914	0.0826	10.4588	0.1311	47.9833	0.277	0.0559	0.3019	100.776	89.1046
XAL 118B	OL 5	41.3035	0.0815	10.46	0.1613	47.9138	0.2617	0.0331	0.3179	100.537	89.0896
XAL 118B	OL 5	41.3916	0.0766	10.493	0.1629	48.0209	0.2617	0.0465	0.2925	100.783	89.0806
XAL 118B	OL 5	41.5463	0.0637	10.4073	0.1459	47.5073	0.2749	0.0534	0.3045	100.32	89.0556
XAL 118B	OL 5	41.215	0.0642	10.5715	0.146	48.1201	0.2709	0.0464	0.3074	100.733	89.028
XAL 118B	OL 6	41.4159	0.0484	10.3505	0.1371	48.0299	0.2425	0.0417	0.3241	100.601	89.2146
XAL 118B	OL 6	41.4135	0.0419	10.4364	0.1371	48.0668	0.2326	0.0323	0.2939	100.671	89.1422
XAL 118B	OL 6	41.4096	0.0845	10.5062	0.1557	48.2219	0.2457	0.0647	0.2794	100.962	89.1089
XAL 118B	OL 6	41.2088	0.0619	10.4942	0.1306	48.0819	0.2525	0.0523	0.2639	100.573	89.0916
XAL 118B	OL 6	41.1349	0.0578	10.4941	0.1598	47.9874	0.252	0.0438	0.2901	100.429	89.0727
XAL 118B	OL 6	41.2882	0.0505	10.6241	0.1366	47.9964	0.2505	0.0534	0.2845	100.702	88.9542
XAL 118B	OL 6	41.2538	0.0768	10.8336	0.1668	47.9597	0.252	0.0485	0.278	100.88	88.7533
XAL 118B	OL 6	41.216	0.1221	10.7771	0.1478	47.5522	0.2536	0.0594	0.2666	100.413	88.7203
XAL 118B	OL 6	41.0782	0.0512	11.2322	0.1547	47.4902	0.2593	0.056	0.2443	100.596	88.2859
XAL 118B	OL 7	41.7234	0.051	10.8056	0.1569	47.5496	0.2803	0.0418	0.2268	100.85	88.6932
XAL 118B	OL 7	41.3648	0.0505	10.9328	0.1454	47.5709	0.2854	0.0412	0.2812	100.706	88.5796
XAL 118B	OL 7	41.5725	0.043	11.0749	0.1743	47.3842	0.2822	0.033	0.2426	100.833	88.4081
XAL 118B	OL 7	41.3661	0.0476	11.1119	0.1581	47.2706	0.2693	0.036	0.2609	100.522	88.3493
XAL 118B	OL 7	41.4123	0.0544	11.2507	0.1671	47.3929	0.2701	0.0323	0.2299	100.818	88.2476
XAL 118B	OL 7	41.4453	0.0672	11.2963	0.1775	47.2896	0.2453	0.0488	0.2652	100.851	88.183
XAL 118B	OL 8	41.4379	0.0654	10.8274	0.1616	47.4478	0.2574	0.0357	0.2855	100.521	88.6514
XAL 118B	OL 8	41.3772	0.049	10.8439	0.172	47.3712	0.2527	0.0399	0.3044	100.422	88.6198
XAL 118B	OL 8	41.1899	0.0118	11.045	0.1673	47.2094	0.2925	0.0361	0.256	100.228	88.3981
XAL 118B	OL 8	41.4293	0.0603	11.1838	0.1572	47.4456	0.2537	0.0288	0.1724	100.723	88.3211
XAL 118B	OL 8	41.4488	0.0159	11.2241	0.1927	47.2133	0.2362	0.0184	0.2164	100.584	88.2328
XAL 118B	OL 8	41.3708	0.0417	11.2347	0.1721	47.2356	0.2404	0.0412	0.2372	100.614	88.2281
XAL 118B	OL 8	41.2458	0.0437	11.2607	0.1811	47.148	0.2732	0.0633	0.2794	100.527	88.1847
XAL 118B	OL 8	41.3687	0.0321	11.4185	0.1764	47.0924	0.2325	0.0252	0.2343	100.581	88.0265
XAL 118B	OL 8	41.1976	0.201	11.3504	0.1513	46.7857	0.288	0.079	0.2664	100.323	88.0208
XAL 118B	OL 9	41.4955	0.0643	10.1151	0.131	47.79	0.2518	0.047	0.3317	100.235	89.3865
XAL 118B	OL 9	41.385	0.0623	10.2749	0.1373	47.9038	0.2317	0.0459	0.3058	100.344	89.2598
XAL 118B	OL 9	41.3827	0.0575	10.392	0.1461	47.8068	0.2364	0.0449	0.3356	100.411	89.1309
XAL 118B	OL 9	41.4203	0.0579	10.4471	0.1272	48.0381	0.2393	0.0444	0.315	100.708	89.1267
XAL 118B	OL 9	41.38	0.0588	10.691	0.1791	47.858	0.2516	0.0603	0.2976	100.781	88.8638
XAL 118B	OL 9	41.3179	0.0622	10.8437	0.1422	47.4785	0.2347	0.036	0.2768	100.403	88.6428
XAL 118B	OL 9	40.8982	0.0442	12.7952	0.2158	45.8568	0.2275	0.043	0.2673	100.379	86.4658
XAL 118B	OL 10	41.2943	0.0746	10.7092	0.1823	47.6662	0.2402	0.0581	0.3048	100.539	88.807
XAL 118B	OL 10	41.2147	0.0878	10.7185	0.1527	47.6348	0.2775	0.0601	0.3175	100.469	88.792
XAL 118B	OL 10	41.3492	0.0602	10.781	0.1345	47.4833	0.2654	0.0565	0.2997	100.454	88.702
[truncated: 2,716 more rows]

## Sheet: Table S6. Chromite compositions
TABLE S6. COMPOSITION OF INDIVIDUAL SPINEL CRYSTALS ANALYZED IN SAMPLE XAL 118A
Sample	Crystal	SiO2	TiO2	Al2O3	Fe2O3	V2O3	Cr2O3	FeO	MnO	MgO	CaO	Adjusted total	Xulvospinel	Xmagnetite	Xchromite
XAL 118A	Oxide 2	0.1176	0.5672	38.751	5.64193	0.1358	25.5177	11.2028	0.2133	17.8624	0.0025	100.012	1.19703	5.9561	28.3026
XAL 118A	Oxide 3	0.0952	0.6036	38.8186	5.66983	0.108	24.8979	12.9356	0.2922	16.6181	0.0359	100.075	1.28236	6.02556	27.7997
XAL 118A	Oxide 3	0.1277	0.5276	39.0495	6.60441	0.1558	24.296	11.4871	0.266	17.6311	0.0226	100.168	1.11278	6.9679	26.931
XAL 118A	Oxide 3	0.1204	0.5358	38.92	6.98245	0.1248	24.0192	12.0435	0.1794	17.2668	0.0443	100.237	1.13262	7.38336	26.6843
XAL 118A	Oxide 3	0.0827	0.5603	38.0559	6.80601	0.1376	24.4979	12.1098	0.2802	16.9005	0.0409	99.4717	1.19777	7.27797	27.523
XAL 118A	Oxide 3	0.1217	0.5574	37.3181	7.05239	0.1155	24.4939	14.7867	0.3522	15.1188	0.059	99.9757	1.20303	7.61394	27.7831
XAL 118A	Oxide 5	0.0461	0.6597	30.506	5.6466	0.1598	34.6115	11.9852	0.2989	16.5253	0.0049	100.444	1.44313	6.17892	39.792
XAL 118A	Oxide 5	0.1221	0.5104	44.5687	5.56651	0.1456	19.6736	10.2204	0.2192	19.0387	0.0212	100.087	1.04675	5.71061	21.2047
XAL 118A	Oxide 7	0.0879	0.6087	38.4244	5.7303	0.1433	25.0974	13.6648	0.366	16.0774	0.0383	100.239	1.29769	6.11098	28.1198
XAL 118A	Oxide 7	0.1103	0.6555	39.6879	5.54108	0.1753	23.5508	14.4018	0.3401	15.8898	0.0092	100.362	1.39102	5.88192	26.2652
XAL 118A	Oxide 7	0.098	10.6645	10.9223	24.3337	0.3924	14.5741	27.8112	0.465	9.2919	0.0575	98.6106	27.1289	30.9645	19.4844
XAL 118A	Oxide 8	0.1105	0.6839	20.0663	4.31578	0.1561	46.853	12.3982	0.2954	15.1594	0.0152	100.054	1.57598	4.97487	56.7427
XAL 118A	Oxide 8	0.1385	0.6942	37.8897	4.36667	0.1373	27.9944	10.6405	0.1938	18.2799	0.0234	100.358	1.46151	4.59869	30.9746
XAL 118A	Oxide 9	0.1231	0.626	41.4577	6.93704	0.1343	20.2287	13.097	0.3568	16.6702	0.0403	99.6712	1.32112	7.3233	22.4363
XAL 118A	Oxide 9	0.0925	1.1872	40.2856	8.22388	0.1576	19.6098	14.0052	0.2913	16.3547	0.0654	100.273	2.51092	8.70064	21.7971
XAL 118A	Oxide 10	0.1065	12.4963	6.949	30.2757	0.3816	9.3373	32.6987	0.5561	6.7748	0.0996	99.6755	32.7169	39.6506	12.8478
XAL 118A	Oxide 19	0.1028	0.4366	44.4407	4.75187	0.1192	20.4724	11.4324	0.2356	18.2387	0.0069	100.237	0.898739	4.89305	22.148
XAL 118A	Oxide 19	0.0876	0.455	44.403	4.78748	0.1287	20.196	12.5387	0.2513	17.4689	0.0284	100.345	0.940184	4.94849	21.9322
XAL 118A	Oxide 19	0.0919	0.4435	44.4973	4.97148	0.1335	20.5188	11.121	0.2747	18.3734	0.0431	100.469	0.910562	5.10583	22.1403
XAL 118A	Oxide 19	0.1186	0.499	43.6074	4.65267	0.1298	21.1244	12.4071	0.2685	17.4505	0.0515	100.309	1.03431	4.8241	23.0117
XAL 118A	Oxide 19	0.1967	15.1232	5.5195	29.8638	0.3835	5.6486	35.4437	0.5524	6.2835	0.127	99.142	40.179	39.6886	7.887
XAL 118A	Oxide 19	0.0805	11.7062	8.212	28.8486	0.3643	11.055	31.2317	0.5361	7.4304	0.0775	99.5423	30.3496	37.4134	15.063
XAL 118A	Oxide 19	0.0821	13.2853	6.4256	29.7912	0.3637	8.9098	33.2389	0.5733	6.7876	0.0963	99.554	34.8971	39.1446	12.2999
XAL 118A	Oxide 19	0.0891	13.9633	7.0027	28.956	0.3964	7.3075	33.8051	0.5198	6.6773	0.1373	98.8545	36.8342	38.2091	10.1309
XAL 118A	Oxide 21	0.0712	0.4148	41.1589	4.70864	0.0981	24.4874	10.8562	0.2657	18.2445	0.0023	100.308	0.863661	4.90417	26.7956
XAL 118A	Oxide 23	0.1517	0.6067	39.0157	5.04049	0.1032	26.0509	10.8176	0.2013	18.1914	0.0251	100.204	1.27442	5.29635	28.7592
XAL 118A	Oxide 24	0.1254	0.6683	42.1837	5.4491	0.1593	20.909	14.1582	0.2818	16.3403	0.013	100.288	1.40212	5.71878	23.0548
XAL 118A	Oxide 32	0.131	0.5422	47.142	5.04393	0.1289	17.4225	9.78734	0.2227	19.5995	0.024	100.044	1.0984	5.11136	18.5493
XAL 118A	Oxide 32	0.1182	0.5545	42.7404	5.24559	0.1636	21.6033	11.3062	0.2186	18.1924	0.0176	100.16	1.14958	5.43995	23.5381
XAL 118A	Oxide 33	0.1165	0.5392	42.1547	4.74399	0.1661	22.0798	13.739	0.2437	16.547	0.0237	100.354	1.12919	4.96966	24.3012
XAL 118A	Oxide 33	0.0814	0.533	41.9722	5.40975	0.1657	21.5251	14.1925	0.3543	16.0504	0.0497	100.334	1.1207	5.68992	23.7862
XAL 118A	Oxide 33	0.1101	14.1934	5.972	31.2786	0.3954	5.7299	34.278	0.5013	6.3905	0.1556	99.0045	37.6831	41.5406	7.99508
XAL 118A	Oxide 33	0.1022	15.6882	4.8777	31.5814	0.4108	3.5573	35.7833	0.5785	6.0984	0.1464	98.8243	42.0335	42.3271	5.00908
XAL 118A	Oxide 33	0.0899	14.5637	5.6027	31.4395	0.4423	5.2545	34.6811	0.4626	6.4064	0.1235	99.0664	38.712	41.8037	7.34041
XAL 118A	Oxide 34	0.0814	0.7997	40.3979	5.20217	0.1216	22.1202	16.0055	0.4009	14.7633	0.0441	99.9367	1.70927	5.56202	24.8478
XAL 118A	Oxide 34	0.0832	13.3489	5.8302	30.8736	0.3787	8.0065	33.3222	0.476	6.6791	0.0911	99.0897	35.3607	40.9099	11.1464
XAL 118A	Oxide 34	0.1163	14.1788	5.4351	32.316	0.3454	5.7252	34.1097	0.5352	6.3872	0.1928	99.3417	37.6345	42.9072	7.98643
XAL 118A	Oxide 34	0.0884	13.2973	5.6215	31.1556	0.3423	8.59	33.2483	0.4968	6.7464	0.1088	99.6953	35.0431	41.0714	11.8973
XAL 118A	Oxide 34	0.0777	14.0314	5.1229	31.668	0.3713	6.6363	34.2439	0.5344	6.4837	0.0501	99.2196	37.3141	42.1268	9.27499
XAL 118A	Oxide 34	0.0841	9.8753	8.2103	27.9182	0.3293	15.175	30.2335	0.5447	7.0926	0.0419	99.505	25.6664	36.2966	20.728
XAL 118A	Oxide 35	0.1174	0.5384	39.3481	4.51694	0.1443	25.9451	11.4045	0.3339	17.6409	0.0297	100.019	1.13466	4.7618	28.7364
XAL 118A	Oxide 35	0.086	15.1343	4.915	31.4511	0.3626	4.8873	35.7946	0.5925	5.9279	0.1106	99.2618	40.4271	42.0253	6.86112
XAL 118A	Oxide 35	0.0882	12.3538	7.3059	30.3838	0.3594	8.927	31.7913	0.5763	7.0524	0.1362	98.9743	32.4395	39.91	12.3196
XAL 118A	Oxide 36	0.0905	0.5479	38.6663	6.00503	0.1324	24.5925	14.1996	0.3054	15.7591	0.0463	100.345	1.16839	6.40573	27.5617
XAL 118A	Oxide 36	0.1338	13.1831	6.6384	31.0956	0.3756	7.2979	32.7264	0.5059	6.9463	0.1389	99.0418	34.7342	40.9831	10.1054
XAL 118A	Oxide 36	0.1043	11.1619	8.5579	30.0437	0.284	10.3936	30.4608	0.6016	7.4982	0.0954	99.2014	28.9833	39.0237	14.1838
XAL 118A	Oxide 40	0.1184	0.5554	42.0118	5.83953	0.1416	22.1353	11.2169	0.2397	18.0614	0.0758	100.396	1.15353	6.06692	24.1616
XAL 118A	Oxide 42	0.1189	0.5803	39.3684	6.40395	0.129	24.159	11.9554	0.2626	17.41	0.0343	100.422	1.22167	6.74394	26.7298
XAL 118A	Oxide 44	0.1247	0.5843	40.7268	7.22055	0.1562	21.9489	11.6744	0.2735	17.7373	0.0344	100.481	1.22142	7.55029	24.1133
XAL 118A	Oxide 45	0.1145	0.5093	44.3108	5.21352	0.1293	20.4471	10.4974	0.1925	18.9023	0.0193	100.336	1.04427	5.3473	22.0336
XAL 118A	Oxide 45	0.1096	0.5025	41.6676	6.32102	0.1057	21.5579	10.8168	0.1986	18.2539	0.0107	99.5445	1.05072	6.61154	23.6904
XAL 118A	Oxide 48	0.0821	0.4671	43.4009	5.249	0.1308	19.7939	12.6911	0.2636	17.022	0.0192	99.1197	0.980308	5.51054	21.8323
XAL 118A	Oxide 49	0.0874	0.4808	43.6322	5.34286	0.1474	20.5842	11.3431	0.1889	18.1641	0.0215	99.9924	0.995072	5.53132	22.3892
XAL 118A	Oxide 49	0.0902	0.5588	44.0096	5.46433	0.1724	19.7223	12.1114	0.2702	17.7294	0.0208	100.149	1.15651	5.65714	21.452
XAL 118A	Oxide 49	0.0845	0.4687	43.569	5.66438	0.1603	20.565	11.3721	0.2463	18.2244	-0.0031	100.352	0.967483	5.84879	22.3096
XAL 118A	Oxide 50	0.0492	0.531	42.6286	5.85943	0.1356	20.4396	13.3821	0.2583	16.6221	0.039	99.9451	1.11362	6.14698	22.5283
XAL 118A	Oxide 50	0.0781	0.5407	43.4338	5.27438	0.0892	20.5778	13.2483	0.2634	16.9638	0.0299	100.499	1.12342	5.48181	22.4699
XAL 118A	Oxide 51	0.0923	0.4799	46.802	5.43505	0.1446	16.5735	11.6959	0.2391	18.1283	0.0309	99.6215	0.984806	5.57915	17.8743
XAL 118A	Oxide 51	0.116	0.4592	45.2137	5.41836	0.1026	18.0258	12.7833	0.2209	17.2836	0.0301	99.6536	0.952093	5.61967	19.6421
XAL 118A	Oxide 51	0.0665	0.5216	45.6087	6.4079	0.1208	16.6088	13.194	0.244	17.0763	0.0285	99.877	1.07994	6.63658	18.0724
XAL 118A	Oxide 52	0.1353	0.5121	44.5983	5.16175	0.1575	19.9615	11.1313	0.1788	18.6224	-0.0008	100.458	1.04962	5.29222	21.5023
XAL 118A	Oxide 52	0.0935	0.5073	43.5618	5.99725	0.1366	20.2794	10.6886	0.2828	18.6372	-0.0031	100.181	1.04611	6.18628	21.9777
XAL 118A	Oxide 53	0.1166	0.6394	40.3024	6.39207	0.1196	22.0462	14.9129	0.2824	15.545	0.0533	100.41	1.35639	6.78293	24.5788
XAL 118A	Oxide 54	0.1031	0.6462	40.2429	6.09636	0.1343	21.9013	15.8822	0.3466	14.8804	0.0326	100.266	1.37796	6.50287	24.5445
XAL 118A	Oxide 54	0.0936	0.6719	40.8636	5.35849	0.1207	21.713	15.8868	0.3142	14.9256	0.0289	99.9768	1.43187	5.71222	24.3183
XAL 118A	Oxide 54	0.0637	0.6639	40.9184	5.55783	0.1443	21.5933	16.0508	0.3757	14.9129	-0.0114	100.269	1.41175	5.91188	24.1318
XAL 118A	Oxide 54	0.1366	15.2536	5.1612	31.169	0.4046	4.8345	35.5242	0.6373	6.1925	0.1361	99.4498	40.5329	41.4308	6.75152
XAL 118A	Oxide 54	0.1285	15.6016	4.843	31.5409	0.4094	4.0602	35.8063	0.5019	6.1796	0.1486	99.2198	41.6215	42.0909	5.69261
XAL 118A	Oxide 54	0.0538	15.7666	4.8685	31.136	0.4488	4.2856	36.0904	0.6021	6.1375	0.1035	99.4927	41.9645	41.4545	5.99475
XAL 118A	Oxide 54	0.0767	14.0123	5.9459	30.7022	0.3745	7.0005	34.4443	0.4391	6.5125	0.0749	99.583	36.9694	40.5198	9.70682
XAL 118A	Oxide 55	0.0957	0.566	43.0371	5.27257	0.1608	21.7071	10.4288	0.254	18.8097	0.0131	100.345	1.16648	5.43559	23.5113
XAL 118A	Oxide 56	0.0951	0.4685	43.5929	4.9258	0.1284	21.9789	9.50043	0.1689	19.4864	0.0092	100.355	0.959706	5.04743	23.6619
XAL 118A	Oxide 57	0.1067	0.5774	42.4403	4.71044	0.1548	22.3592	11.7955	0.2622	17.8538	0.0146	100.275	1.1995	4.89496	24.4115
XAL 118A	Oxide 57	0.093	11.5242	8.658	27.374	0.3825	11.2938	33.1095	0.4458	6.3157	0.0142	99.2107	30.1342	35.8057	15.5204
XAL 118A	Oxide 58	0.1212	0.4952	43.9787	4.87534	0.1118	21.2237	10.2171	0.1882	19.0813	0.0054	100.298	1.01569	5.00207	22.8779
XAL 118A	Oxide 58	0.0791	0.555	43.6768	5.06123	0.1182	21.2804	10.3197	0.2192	18.9101	0.0208	100.24	1.14135	5.20651	22.9996
XAL 118A	Oxide 59	0.0866	0.5841	41.2912	6.25913	0.1415	21.0971	14.6284	0.3309	15.8348	0.0038	100.258	1.23394	6.61431	23.4231
XAL 118A	Oxide 59	0.0591	1.7493	30.3354	13.1017	0.1233	21.9595	19.701	0.4284	11.6696	0.0119	99.1391	3.99961	14.9847	26.3871
XAL 118A	Oxide 61	0.1149	0.5191	44.7904	4.76853	0.1216	20.0913	10.9836	0.1794	18.5906	0.0324	100.192	1.06537	4.89554	21.6708
XAL 118A	Oxide 61	0.1007	0.591	43.3186	5.31563	0.1278	19.8683	14.7376	0.3249	15.9728	0.026	100.383	1.23657	5.56352	21.8477
XAL 118A	Oxide 61	0.0999	14.0264	6.7083	29.7551	0.4415	7.1494	34.3119	0.4558	6.6608	0.1033	99.7125	36.7718	39.0208	9.8504
XAL 118A	Oxide 62	0.1049	0.6013	41.6765	6.26449	0.1175	20.3661	15.7784	0.2729	15.1653	0.0221	100.37	1.27234	6.63076	22.6483
XAL 118A	Oxide 62	0.1316	16.3553	4.7227	30.6822	0.4331	3.6761	37.0122	0.5811	5.8211	0.1632	99.5787	43.6043	40.9187	5.15079
XAL 118A	Oxide 62	0.1218	10.8735	10.0968	26.7458	0.3862	11.8796	30.7597	0.4932	7.2536	0.1192	98.7295	28.1669	34.657	16.1729
XAL 118A	Oxide 64	0.1097	0.4675	43.3382	4.53087	0.1126	21.8893	10.8705	0.2426	18.4374	0.0192	100.018	0.966537	4.6858	23.7839
XAL 118A	Oxide 65	0.0409	0.5545	40.2828	5.33455	0.1182	24.1993	12.3491	0.2527	17.1545	0.0374	100.324	1.16581	5.61034	26.7389
XAL 118A	Oxide 65	0.0748	0.5387	38.9179	5.45198	0.1515	25.4907	12.6788	0.2975	16.8353	0.0304	100.468	1.13917	5.76716	28.3296
XAL 118A	Oxide 65	0.0542	11.2405	10.214	28.0616	0.3579	10.5791	30.9608	0.5278	7.398	0.1292	99.523	28.8824	36.0683	14.286
XAL 118A	Oxide 65	0.0651	9.6812	12.0522	26.9479	0.3278	12.4631	28.6586	0.4997	8.0945	0.1254	98.9154	24.6744	34.3564	16.6939
XAL 118A	Oxide 65	0.0587	9.8199	11.9284	26.582	0.311	12.4132	29.6545	0.4672	7.5821	0.1061	98.9231	25.1288	34.0265	16.6941
XAL 118A	Oxide 65	0.1252	0.6853	41.075	5.2551	0.1447	22.2171	15.0539	0.3339	15.5213	0.0685	100.48	1.44837	5.55576	24.6775
XAL 118A	Oxide 65	0.0907	0.631	40.6116	6.42038	0.1383	22.1903	13.7983	0.2845	16.272	0.0625	100.5	1.33049	6.77187	24.5901
XAL 118A	Oxide 65	0.1156	0.6748	42.285	7.03055	0.1129	19.9048	12.6703	0.2739	17.2011	0.059	100.328	1.40849	7.34062	21.8349
XAL 118A	Oxide 65	0.1053	0.5694	42.4049	5.59693	0.1327	21.3429	12.2054	0.2872	17.4791	0.0337	100.158	1.187	5.83645	23.3831
XAL 118A	Oxide 66	0.0795	0.5099	41.5278	5.24527	0.1459	23.4329	11.1501	0.2455	18.0897	0.0451	100.472	1.06004	5.45469	25.6023
XAL 118A	Oxide 66	0.0608	8.6408	14.231	26.1895	0.2824	13.4457	27.6279	0.4252	8.5238	0.1441	99.5711	21.6113	32.7657	17.6736
XAL 118A	Oxide 66	0.0662	13.3817	6.9511	29.0195	0.4621	8.7686	33.523	0.5825	6.7133	0.092	99.56	35.0717	38.0453	12.0779
XAL 118A	Oxide 66	0.1642	14.5371	6.0713	29.1551	0.3996	7.3413	34.8325	0.4829	6.598	0.101	99.6829	38.2322	38.3558	10.147
XAL 118A	Oxide 66	0.1027	13.3747	7.0275	28.0653	0.4259	9.5429	33.6481	0.5186	6.635	0.1168	99.4575	35.0751	36.8172	13.1526
XAL 118A	Oxide 67	0.1028	0.5731	38.3144	6.80161	0.1177	22.6797	16.4283	0.3482	14.2342	-0.0083	99.5919	1.24256	7.37675	25.8429
XAL 118A	Oxide 67	0.0904	0.4454	40.6638	4.86541	0.1035	24.5876	11.0495	0.2726	18.0147	0.0183	100.111	0.931653	5.09083	27.0293
XAL 118A	Oxide 67	0.1354	0.5327	41.0045	4.49903	0.1379	23.905	12.9165	0.2881	16.9927	0.013	100.425	1.11664	4.71754	26.3352
XAL 118A	Oxide 67	0.0841	12.964	6.6524	29.0619	0.3145	9.5015	33.1336	0.468	6.4879	0.1472	98.8152	34.3177	38.483	13.2186
XAL 118A	Oxide 67	0.0438	14.6168	5.1967	30.063	0.3913	6.914	34.8183	0.5653	6.1289	0.1417	98.8798	39.0564	40.1825	9.70923
XAL 118A	Oxide 67	0.1151	16.1432	4.6229	30.5899	0.3788	3.8341	36.5456	0.5897	5.7535	0.1816	98.7545	43.4214	41.1584	5.41992
XAL 118A	Oxide 68	0.1048	0.6102	42.5989	6.51701	0.1758	19.8816	12.917	0.2824	16.9219	0.0804	100.09	1.27629	6.81853	21.8547
XAL 118A	Oxide 68	0.1112	0.6087	44.3465	5.72993	0.1437	19.0006	12.9232	0.2692	17.2372	0.0615	100.432	1.25921	5.9294	20.6576
XAL 118A	Oxide 68	0.0487	9.3011	11.5231	27.7037	0.2988	13.2839	28.7225	0.4975	7.8441	0.126	99.3494	23.7197	35.341	17.8039
XAL 118A	Oxide 69	0.1149	0.5971	40.5489	4.76336	0.1181	23.548	13.5058	0.3062	16.4167	0.0336	99.9527	1.26263	5.03856	26.1696
XAL 118A	Oxide 69	0.1007	0.6139	39.128	4.5984	0.116	25.8056	12.2561	0.2737	17.1381	0.0304	100.061	1.29837	4.86488	28.6833
XAL 118A	Oxide 69	0.0742	0.5123	40.6324	4.69899	0.1156	25.2338	10.323	0.226	18.6716	-0.0015	100.486	1.06465	4.88485	27.56
XAL 118A	Oxide 69	0.1147	0.5467	38.9681	4.821	0.1334	26.2939	11.8808	0.2405	17.4367	0.0335	100.469	1.1514	5.079	29.1036
XAL 118A	Oxide 70	0.0987	0.6074	38.8756	5.66435	0.1368	24.2192	14.6307	0.2952	15.5106	0.0402	100.079	1.29863	6.05797	27.2137
XAL 118A	Oxide 70	0.1162	0.63	38.6148	5.09716	0.0992	25.4567	14.1683	0.3338	15.8661	0.0402	100.422	1.34156	5.42952	28.4896
XAL 118A	Oxide 70	0.1211	0.6592	38.6548	4.61829	0.1232	25.5577	13.492	0.3233	16.3117	0.0068	99.8682	1.4055	4.92563	28.6386
XAL 118A	Oxide 71	0.0888	0.5046	40.1783	4.49556	0.1514	25.6783	10.625	0.2506	18.4496	-0.0199	100.402	1.05229	4.68964	28.1431
XAL 118A	Oxide 71	0.0604	12.4486	7.21	30.9767	0.357	8.5145	32.2293	0.4779	6.9063	0.1419	99.3227	32.6429	40.6321	11.7339
XAL 118A	Oxide 72	0.1143	0.5917	41.2173	4.4784	0.1497	24.5488	9.84743	0.2471	19.0746	-0.0054	100.264	1.22598	4.6416	26.7317
XAL 118A	Oxide 72	0.1129	0.4745	42.7127	4.79398	0.1403	22.7689	9.52775	0.2154	19.317	0.0054	100.069	0.977985	4.94263	24.6634
XAL 118A	Oxide 73	0.1189	0.4866	40.0088	4.73837	0.133	24.6307	13.7477	0.3243	16.2494	0.0289	100.467	1.02803	5.00758	27.3481
XAL 118A	Oxide 73	0.1037	13.9689	6.1833	30.2769	0.4561	7.2517	34.3961	0.5546	6.529	0.0792	99.7994	36.724	39.8166	10.0194
XAL 118A	Oxide 73	0.0404	11.4731	8.1966	29.3869	0.3946	10.7499	31.9984	0.5326	6.7622	0.0803	99.6149	29.8827	38.2875	14.7149
XAL 118A	Oxide 74	0.0747	0.6299	40.9798	4.37474	0.1791	24.8833	10.229	0.245	18.7599	0.0168	100.372	1.30763	4.54288	27.1479
XAL 118A	Oxide 74	0.1204	0.5708	40.6733	4.86427	0.195	24.6192	10.7574	0.2423	18.3901	0.0214	100.454	1.18816	5.06494	26.9328
XAL 118A	Oxide 74	0.0689	8.8696	12.8902	25.3885	0.323	14.644	28.3385	0.4376	8.2568	0.0396	99.2567	22.4141	32.0937	19.4488
XAL 118A	Oxide 74	0.0843	11.6631	7.8051	28.3116	0.355	11.8232	32.2261	0.5194	6.8347	0.0475	99.6699	30.3827	36.8928	16.1869
XAL 118A	Oxide 75	0.1116	0.6654	35.8312	5.5911	0.1266	27.7316	14.4968	0.3097	15.3477	0.0445	100.256	1.43839	6.04584	31.5053
XAL 118A	Oxide 75	0.1183	14.7862	5.4201	29.0228	0.4181	6.9703	34.8969	0.4921	6.3829	0.0938	98.6015	39.4719	38.7557	9.77908
XAL 118A	Oxide 75	0.1116	15.0859	5.7605	29.1778	0.4348	6.2725	35.3997	0.4671	6.4419	0.0798	99.2318	39.955	38.6561	8.73084
XAL 118A	Oxide 75	0.1261	15.5884	5.1413	29.7062	0.4005	5.472	35.4971	0.5111	6.3558	0.1494	98.9477	41.5468	39.6048	7.66475
XAL 118A	Oxide 76	0.1048	0.5973	38.9956	4.56957	0.153	26.094	11.9324	0.3203	17.3939	0.0008	100.162	1.26101	4.82578	28.9523
XAL 118A	Oxide 76	0.0896	0.5874	39.5606	4.93112	0.1532	25.6656	11.3414	0.2523	17.8626	0.0259	100.47	1.23147	5.17129	28.2784
XAL 118A	Oxide 76	0.0822	0.7352	41.8737	5.23513	0.1567	20.9963	15.0216	0.3065	15.6448	0.0313	100.083	1.55297	5.53159	23.3085
XAL 118A	Oxide 76	0.1023	13.5095	7.4178	28.3799	0.3914	8.8023	33.3314	0.5056	6.9542	0.127	99.5213	35.2665	37.0595	12.0763
XAL 118A	Oxide 76	0.0722	9.2645	12.9273	25.5279	0.3588	13.6378	28.839	0.5431	8.0171	0.0725	99.2602	23.4467	32.3177	18.1392
XAL 118A	Oxide 77	0.0542	0.6627	42.0485	6.53047	0.1454	19.7372	15.8001	0.3814	15.0636	0.0488	100.472	1.40034	6.90283	21.9189
XAL 118A	Oxide 77	0.0653	14.656	6.346	28.5858	0.3732	7.4487	34.5686	0.5374	6.6395	0.1181	99.3387	38.61	37.6704	10.3129
XAL 118A	Oxide 78	0.1312	0.5516	43.0221	5.38423	0.1181	21.1035	10.5463	0.2144	18.6104	0.0269	99.7085	1.14346	5.58324	22.9915
XAL 118A	Oxide 78	0.1173	0.6003	41.232	5.85602	0.097	22.9382	10.6783	0.2443	18.4514	0.0237	100.238	1.24904	6.09504	25.0832
XAL 118A	Oxide 79	0.0477	2.9029	25.5779	12.3577	0.2958	26.2388	21.1401	0.4324	10.906	0.0869	99.9863	6.74936	14.3726	32.062
XAL 118A	Oxide 79	0.0757	12.9727	6.8358	27.0211	0.3918	11.1034	33.1071	0.5503	6.6333	0.0857	98.7767	34.2582	35.6946	15.4101
XAL 118A	Oxide 79	0.1124	14.982	5.6841	28.098	0.4774	7.7866	35.4204	0.4456	6.3193	0.1249	99.4507	39.6259	37.1749	10.8236
XAL 118A	Oxide 80	0.0615	0.5904	39.8534	5.53538	0.1466	23.4325	15.1903	0.3335	15.2423	0.0449	100.431	1.25637	5.89231	26.2064
XAL 118A	Oxide 81	0.0838	0.5217	41.4257	5.2327	0.1388	22.7122	12.7704	0.2711	17.0419	0.0122	100.211	1.09377	5.48776	25.0253
XAL 118A	Oxide 81	0.0973	0.5638	43.0435	4.97197	0.1368	20.9449	13.8107	0.2859	16.6081	0.0146	100.478	1.17553	5.18564	22.9511
XAL 118A	Oxide 84	0.0938	0.4994	44.8524	5.37987	0.1412	19.6045	11.193	0.2467	18.4463	0.0308	100.488	1.02361	5.51597	21.1182
XAL 118A	Oxide 84	0.1084	0.5387	42.7314	5.46769	0.1247	20.4201	14.1206	0.2171	16.2101	0.0536	99.9924	1.13133	5.74395	22.538
XAL 118A	Oxide 84	0.1235	0.5343	46.7818	5.92714	0.1411	16.3065	12.4947	0.2495	17.8089	0.0332	100.401	1.09239	6.06181	17.5214
XAL 118A	Oxide 84	0.083	0.5323	42.4372	5.95444	0.1613	20.443	14.0409	0.3025	16.1796	0.0566	100.191	1.11789	6.25528	22.5632
XAL 118A	Oxide 85	0.0938	0.5224	41.736	5.45204	0.1778	22.5791	11.1978	0.1639	18.2403	-0.0184	100.145	1.087	5.67482	24.6916
XAL 118A	Oxide 85	0.1012	0.5489	41.9207	5.96632	0.1243	22.1199	10.8052	0.2386	18.4596	0.0031	100.288	1.13888	6.19235	24.1203
XAL 118A	Oxide 86	0.1029	0.5248	42.0603	4.94135	0.1429	22.9618	11.3422	0.2289	18.1447	0.0107	100.461	1.0885	5.12681	25.0298
XAL 118A	Oxide 86	0.0979	0.5489	41.4251	5.42157	0.122	23.1059	11.2044	0.1842	18.1985	0	100.308	1.14228	5.6438	25.2708
XAL 118A	Oxide 88	0.118	0.5016	39.8665	5.00388	0.1359	24.8882	11.4059	0.2063	17.761	0.016	99.9034	1.05548	5.26699	27.5233
XAL 118A	Oxide 88	0.1042	0.5305	38.2854	4.6684	0.1275	26.1327	13.112	0.3583	16.3095	0.0288	99.6572	1.13454	4.99423	29.3721
XAL 118A	Oxide 88	0.0999	0.5459	36.9254	4.58407	0.1307	28.2498	12.2959	0.324	16.8347	0.0167	100.007	1.16664	4.90049	31.7288
XAL 118A	Oxide 88	0.0971	12.4726	8.6615	27.2293	0.3885	10.0562	32.0507	0.5238	7.1347	0.1295	98.744	32.5522	35.5487	13.7934
XAL 118A	Oxide 89	0.1175	0.4667	40.7857	4.6212	0.1723	24.5753	10.8197	0.2914	18.3222	-0.0268	100.145	0.973659	4.82268	26.9453
XAL 118A	Oxide 89	0.1469	0.4738	40.0204	4.67846	0.1098	25.4298	11.3495	0.2921	17.8239	0.032	100.357	0.992461	4.90215	27.9948
XAL 118A	Oxide 90	0.1028	0.5464	40.8266	5.26973	0.1043	23.6933	11.8425	0.3129	17.5774	0.0244	100.3	1.14366	5.51746	26.0631
XAL 118A	Oxide 90	0.1207	0.4932	43.0127	4.69687	0.1336	22.1808	10.3539	0.1912	18.7556	0.0323	99.9708	1.01937	4.85606	24.0937
XAL 118A	Oxide 91	0.0871	0.5592	43.1914	5.16313	0.1406	20.8555	11.9894	0.2096	17.7521	0.01	99.9579	1.16219	5.36768	22.7795
XAL 118A	Oxide 91	0.092	0.5211	41.6265	4.97162	0.1786	23.1045	11.7438	0.2627	17.7235	0.0253	100.25	1.08691	5.18723	25.327
XAL 118A	Oxide 91	0.0642	0.4957	42.8128	5.45485	0.1276	21.7428	11.3454	0.2304	18.0964	0.033	100.403	1.02633	5.64959	23.6592
XAL 118A	Oxide 91	0.0804	14.5229	5.5637	32.2999	0.4354	4.6103	34.4004	0.4707	6.5482	0.1187	99.0506	38.5922	42.9352	6.4386
XAL 118A	Oxide 92	0.0994	0.5677	40.3961	5.13719	0.1316	24.3364	11.2099	0.2583	17.9982	0.0092	100.144	1.18855	5.38011	26.7776
XAL 118A	Oxide 93	0.1126	0.6102	39.1937	5.18298	0.1528	25.4076	12.1616	0.261	17.308	0.0236	100.414	1.28575	5.46298	28.1361
XAL 118A	Oxide 93	0.1103	0.604	38.5077	5.82876	0.1319	25.4215	12.1132	0.3342	17.1721	0.0243	100.248	1.27884	6.17337	28.2877
XAL 118A	Oxide 94	0.1361	0.5428	39.0046	6.36617	0.1557	23.8127	12.7564	0.2899	16.699	0.032	99.7953	1.15446	6.77304	26.6173
XAL 118A	Oxide 94	0.1229	0.5883	40.4979	6.08168	0.1487	22.8939	12.062	0.2921	17.3025	0.0619	100.052	1.23738	6.39873	25.307
XAL 118A	Oxide 94	0.1321	0.5764	38.1341	6.11056	0.1435	24.8192	13.1698	0.2791	16.3352	0.0395	99.7394	1.233	6.5386	27.9024
XAL 118A	Oxide 94	0.1052	0.5993	40.5021	7.27494	0.1469	20.9394	13.5021	0.304	16.3562	0.0282	99.7583	1.27101	7.71791	23.3391
XAL 118A	Oxide 95	0.1048	0.5756	40.549	5.89482	0.1625	22.1677	13.3516	0.2558	16.45	0.026	99.5377	1.22129	6.25653	24.7192
XAL 118A	Oxide 95	0.1108	0.5983	39.3219	7.09725	0.137	22.2382	13.266	0.2675	16.2698	0.0548	99.3615	1.27886	7.58857	24.9816
XAL 118A	Oxide 95	0.113	0.5849	39.4362	6.30743	0.1376	23.8369	12.898	0.3242	16.8086	0.0182	100.465	1.235	6.66196	26.4514
XAL 118A	Oxide 95	0.1375	0.6161	38.0017	7.65134	0.138	23.1918	13.2424	0.2944	16.1895	0.0559	99.5185	1.32267	8.21678	26.1667
XAL 118A	Oxide 96	0.1234	0.6265	37.9127	5.87398	0.1198	24.514	14.745	0.3375	15.1911	0.0505	99.4944	1.35296	6.34544	27.8223
XAL 118A	Oxide 97	0.0955	0.5709	40.657	5.28699	0.12	23.7297	11.362	0.2531	17.8692	0.0167	99.9611	1.19672	5.54376	26.142
XAL 118A	Oxide 97	0.0969	0.5711	38.3221	5.40867	0.1763	25.8533	13.1117	0.333	16.5545	0.0083	100.436	1.2126	5.7446	28.8493
XAL 118A	Oxide 97	0.1239	0.5559	38.8859	5.32573	0.1621	25.914	11.4238	0.2803	17.7377	0.0183	100.427	1.16962	5.60521	28.6548
XAL 118A	Oxide 98	0.149	0.5596	39.7492	5.43737	0.1471	24.6191	11.3958	0.2552	17.8357	0.0153	100.163	1.1753	5.7125	27.1744
XAL 118A	Oxide 98	0.0827	0.5278	38.9333	5.60137	0.0989	25.67	11.5371	0.25	17.6143	0.0183	100.334	1.11213	5.90399	28.4267
XAL 118A	Oxide 98	0.0838	0.5753	40.2545	5.78464	0.1505	23.6761	10.7683	0.1694	18.2163	0.0107	99.6896	1.20799	6.07589	26.1273
XAL 118A	Oxide 99	0.0853	0.5199	42.5275	5.36281	0.1102	21.7335	12.402	0.2554	17.3789	0.04	100.416	1.08185	5.58217	23.7679
XAL 118A	Oxide 101	0.1084	0.609	40.7917	6.74021	0.107	20.8618	14.8307	0.2665	15.57	0.0367	99.9221	1.29435	7.16595	23.3025
XAL 118A	Oxide 101	0.1238	0.5679	41.0713	4.55095	0.1261	23.4101	13.2577	0.3114	16.724	0.0092	100.153	1.19451	4.78834	25.8783
XAL 118A	Oxide 101	0.1009	0.6055	40.2578	5.32527	0.159	23.0579	15.1184	0.3825	15.4079	0.0191	100.434	1.28507	5.65353	25.7186
XAL 118A	Oxide 101	0.0948	9.0836	13.6859	24.9298	0.3558	14.0235	28.1391	0.4828	8.4355	0.1096	99.3402	22.8199	31.3286	18.5152
XAL 118A	Oxide 102	0.107	0.6397	39.1409	5.24446	0.0958	25.1202	11.8305	0.2317	17.4487	0.0191	99.8779	1.35257	5.5469	27.914
XAL 118A	Oxide 102	0.1398	0.6158	39.1376	5.03909	0.0988	25.5095	12.6956	0.223	16.9845	0.0381	100.482	1.29947	5.31916	28.2907
XAL 118A	Oxide 102	0.0961	0.641	38.8115	6.29011	0.1464	24.5438	12.2354	0.2578	17.1442	0.0343	100.201	1.35663	6.65929	27.3
XAL 118A	Oxide 102	0.0804	0.6091	39.4703	4.65645	0.1215	25.1176	13.3071	0.3104	16.4094	0.0496	100.132	1.29151	4.93889	27.9899
XAL 118A	Oxide 102	0.1072	15.6758	5.1138	29.5405	0.3807	4.9884	36.3865	0.5292	5.6798	0.1645	98.5665	42.1486	39.7317	7.04905
XAL 118A	Oxide 103	0.0838	0.5431	43.6033	5.34518	0.1125	20.5485	12.5745	0.2863	17.34	0.0585	100.496	1.12527	5.53992	22.3754
XAL 118A	Oxide 103	0.0929	0.6415	41.4985	6.21093	0.1605	20.9716	14.06	0.3102	16.205	0.0276	100.179	1.35193	6.54756	23.2276
XAL 118A	Oxide 103	0.0886	14.507	5.5088	31.372	0.4028	5.4436	34.6488	0.5065	6.4168	0.0919	98.9868	38.6048	41.761	7.61317
XAL 118A	Oxide 104	0.0935	0.6264	24.7616	4.60111	0.1437	40.6748	15.4675	0.4258	13.5279	0.0295	100.352	1.4281	5.24729	48.7359
XAL 118A	Oxide 105	0.1477	0.6616	30.4209	5.1034	0.1297	33.6099	16.5282	0.4177	13.3791	0.0828	100.481	1.47487	5.69093	39.3769
XAL 118A	Oxide 105	0.1248	1.0648	38.9885	6.92761	0.1448	22.2566	14.2401	0.2955	16.0552	0.0458	100.144	2.26797	7.38104	24.914
XAL 118A	Oxide 105	0.083	0.6601	29.9685	4.89186	0.1687	35.1886	13.9764	0.3496	15.0479	0.0515	100.386	1.46022	5.41313	40.9097
XAL 118A	Oxide 105	0.0871	0.653	20.7734	4.22978	0.1221	45.1806	15.0744	0.4294	13.2883	0.0278	99.8659	1.52111	4.92867	55.3114
XAL 118A	Oxide 106	0.1338	0.5178	42.7871	4.62423	0.1317	22.7435	9.907	0.2565	19.1037	0.0146	100.22	1.06694	4.76629	24.6291
XAL 118A	Oxide 107	0.1172	0.4769	42.0686	4.5867	0.1453	23.3473	11.3972	0.2823	18.0466	0.0192	100.487	0.989318	4.75964	25.4543
XAL 118A	Oxide 107	0.0961	0.4693	42.143	4.85556	0.1399	22.8412	11.5329	0.2822	17.9358	0.0054	100.301	0.975415	5.04828	24.9502
XAL 118A	Oxide 108	0.1157	0.4903	39.1448	5.29163	0.0978	25.5592	11.6629	0.36	17.5071	0.0031	100.233	1.03355	5.57987	28.316
XAL 118A	Oxide 108	0.1149	0.534	41.5032	4.91364	0.123	23.0154	12.9101	0.2614	16.9721	0.0391	100.387	1.11798	5.14588	25.3236
XAL 118A	Oxide 109	0.1188	0.4869	42.9202	4.50603	0.1274	22.8514	9.71577	0.2056	19.2831	-0.0008	100.214	1.00181	4.6377	24.71
XAL 118A	Oxide 110	0.1175	0.5809	37.6201	5.25903	0.1229	25.935	14.4957	0.3485	15.5009	0.0076	99.9882	1.24857	5.65435	29.2964
XAL 118A	Oxide 110	0.0943	0.7652	36.988	6.31797	0.1456	24.5069	17.2867	0.3854	13.6291	0.0371	100.156	1.66592	6.88053	28.0403
XAL 118A	Oxide 110	0.1088	14.5854	6.0084	28.3039	0.4563	7.5682	34.9304	0.4793	6.3952	0.0871	98.923	38.6962	37.5631	10.5526
XAL 118A	Oxide 110	0.1361	15.6273	5.1592	29.5137	0.4793	5.4363	35.5022	0.4989	6.3612	0.1569	98.8711	41.67	39.3666	7.6183
XAL 118A	Oxide 111	0.1175	0.5724	39.7246	5.3387	0.1381	24.5807	11.9206	0.2408	17.5192	-0.0008	100.152	1.20471	5.62062	27.189
XAL 118A	Oxide 112	0.0937	0.6506	38.721	7.41906	0.1408	23.5813	12.1023	0.2445	17.3107	0.0046	100.269	1.37597	7.84891	26.2107
XAL 118A	Oxide 115	0.0948	0.7551	38.9962	4.80079	0.1139	23.6505	17.6253	0.4005	13.5894	0.0395	100.066	1.63204	5.19045	26.8648
XAL 118A	Oxide 115	0.1025	14.9092	5.3715	29.575	0.424	6.5609	34.8293	0.5588	6.3355	0.1507	98.8173	39.7502	39.4435	9.19315
XAL 118A	Oxide 115	0.0625	13.8067	5.6669	29.168	0.362	8.7016	33.9301	0.5486	6.4498	0.0793	98.7757	36.7463	38.8325	12.1713
XAL 118A	Oxide 116	0.1135	0.5534	41.466	4.55529	0.1501	23.8138	10.6011	0.2717	18.5187	-0.0046	100.039	1.15123	4.74028	26.0356
XAL 118A	Oxide 116	0.0834	0.5533	41.0496	4.65983	0.1302	24.3386	10.4499	0.2309	18.5465	0.0077	100.05	1.15261	4.85577	26.6461
XAL 118A	Oxide 116	0.0848	0.5976	41.7342	4.48679	0.133	22.6364	12.3348	0.2563	17.2691	0.0176	99.5506	1.25565	4.71585	24.9967
XAL 118A	Oxide 117	0.0857	0.5754	37.5663	7.55672	0.0855	23.5196	13.8956	0.3073	15.7145	0.0098	99.3165	1.24298	8.16567	26.7017
XAL 118A	Oxide 117	0.0882	0.5121	41.9132	5.9336	0.1038	21.5708	12.0394	0.2973	17.4756	0.0175	99.9513	1.07133	6.20946	23.7166
XAL 118A	Oxide 118	0.0914	0.7011	43.3445	5.56381	0.1494	19.7878	13.7287	0.3147	16.6982	0.0268	100.407	1.46051	5.79778	21.6639
XAL 118A	Oxide 118	0.0698	0.6572	43.6648	4.76593	0.1687	20.2592	13.7351	0.2765	16.737	0.0134	100.348	1.36745	4.96053	22.154
XAL 118A	Oxide 118	0.0573	0.767	42.7032	5.79003	0.1653	19.375	15.4102	0.3418	15.4061	0.0451	100.061	1.61812	6.1103	21.4819
XAL 118A	Oxide 122	0.0865	0.593	41.1629	5.1549	0.1338	22.7315	13.4072	0.254	16.5631	0.0425	100.129	1.24863	5.42957	25.155
XAL 118A	Oxide 122	0.0799	0.5616	40.677	5.21947	0.1259	23.7544	11.5563	0.2207	17.6513	0.0501	99.8966	1.17919	5.48211	26.2129
XAL 118A	Oxide 122	0.0896	0.5402	42.432	5.2381	0.0845	22.1581	11.5018	0.2538	17.9613	0.0352	100.295	1.12163	5.44045	24.1793
XAL 118A	Oxide 123	0.1421	0.5389	40.25	4.4021	0.1082	24.9611	11.3189	0.2029	17.8818	0.02	99.8259	1.1319	4.62515	27.5537
XAL 118A	Oxide 123	0.0866	0.5864	40.0495	4.71627	0.1471	25.0838	12.1373	0.2585	17.4171	0.0167	100.499	1.23002	4.94861	27.6521
XAL 118A	Oxide 124	0.1005	0.617	41.5637	4.3595	0.1026	24.1414	10.5416	0.237	18.6324	0.0126	100.308	1.27962	4.52268	26.3131
XAL 118A	Oxide 124	0.1122	13.1307	7.4055	28.9869	0.3761	8.3437	32.7836	0.5122	6.8329	0.1543	98.6381	34.6026	38.2109	11.5557
XAL 118A	Oxide 126	0.1117	0.6741	40.3696	5.10093	0.1181	23.158	14.2852	0.3389	15.9725	0.0241	100.153	1.42818	5.40595	25.7854
XAL 118A	Oxide 126	0.0948	11.9534	7.4995	27.7295	0.3285	12.2694	32.1108	0.5329	6.7444	0.1511	99.4144	31.264	36.2794	16.8652
XAL 118A	Oxide 127	0.1078	0.5457	39.5167	4.59958	0.1176	25.928	11.2221	0.2597	17.9267	0.005	100.229	1.1457	4.8306	28.609
XAL 118A	Oxide 128	0.0744	0.4957	42.916	6.94483	0.1268	19.5387	12.9934	0.243	16.9778	0.0444	100.355	1.03351	7.24305	21.4094
XAL 118A	Oxide 130	0.108	0.6068	41.1085	5.38183	0.1583	22.3811	14.3263	0.3056	16.0656	0.0233	100.465	1.27851	5.67223	24.7831
XAL 118A	Oxide 130	0.0986	0.5472	41.9235	4.62837	0.1046	22.8032	12.4527	0.2108	17.4086	-0.005	100.173	1.14275	4.83502	25.0274
XAL 118A	Oxide 130	0.0961	0.557	43.1169	5.55965	0.1083	20.8646	11.9668	0.3278	17.6968	0.0361	100.33	1.15521	5.76791	22.7421
XAL 118A	Oxide 131	0.1449	0.475	40.2089	5.5208	0.1366	24.4472	11.0093	0.2294	17.9228	0.0876	100.183	0.995261	5.78643	26.9208
XAL 118A	Oxide 132	0.1342	0.4896	44.1711	5.52966	0.1422	20.071	11.0089	0.2359	18.5279	0.0185	100.329	1.00665	5.68723	21.6881
XAL 118A	Oxide 132	0.1296	0.4409	44.8873	5.90212	0.1437	19.1935	10.3616	0.1682	19.0989	-0.0093	100.316	0.901482	6.03657	20.6246
XAL 118A	Oxide 132	0.1056	0.5659	42.9595	5.728	0.132	20.8448	12.1856	0.2402	17.6511	0.0277	100.44	1.17375	5.94299	22.7221
XAL 118A	Oxide 133	0.0804	0.4748	45.0568	4.66432	0.1251	20.3527	8.98193	0.2028	19.8298	0.0076	99.7761	0.969659	4.76499	21.8447
XAL 118A	Oxide 135	0.092	0.5383	38.1078	4.918	0.1682	27.1286	11.3453	0.27	17.6236	0.0241	100.216	1.13834	5.20238	30.1503
XAL 118A	Oxide 135	0.1072	0.5588	38.5357	4.44665	0.1467	26.4137	12.4473	0.2492	16.9634	0.0066	99.8752	1.18727	4.72597	29.4943
XAL 118A	Oxide 135	0.0883	0.6886	37.9702	4.81364	0.1114	25.4428	16.2173	0.3465	14.5128	0.0025	100.194	1.48444	5.19079	28.8254
XAL 118A	Oxide 135	0.1094	17.0887	4.6114	28.4705	0.5024	4.3254	37.4037	0.545	6.0276	0.1261	99.2101	45.6309	38.0286	6.07004
XAL 118A	Oxide 135	0.0879	17.9188	4.0626	28.8022	0.5014	2.4836	39.0402	0.591	5.1019	0.1847	98.7743	48.5139	39.0076	3.5339
XAL 118A	Oxide 137	0.0894	0.5148	43.603	5.03783	0.0908	21.0151	10.8971	0.2183	18.5213	-0.005	99.9827	1.06334	5.20528	22.813
XAL 118A	Oxide 137	0.058	13.7425	6.8036	28.2749	0.4333	8.8631	33.6001	0.4704	6.7599	0.1261	99.1318	36.1618	37.2178	12.257
XAL 118A	Oxide 138	0.111	0.6547	41.7504	6.87861	0.1479	18.7947	16.7834	0.3558	14.2401	0.075	99.7916	1.3989	7.3521	21.1055
XAL 118A	Oxide 138	0.0781	15.3131	6.4452	27.1875	0.4161	7.6917	35.0039	0.4915	6.828	0.1306	99.5857	40.1452	35.6538	10.5976
XAL 118A	Oxide 139	0.1062	0.5642	41.3525	5.95906	0.1755	21.335	12.523	0.2667	17.023	0.0234	99.3285	1.19141	6.29465	23.6775
XAL 118A	Oxide 139	0.0908	0.5102	42.3273	5.30333	0.1558	22.098	12.0792	0.2282	17.645	0.0201	100.458	1.06044	5.51392	24.1388
XAL 118A	Oxide 139	0.1184	1.1994	38.0862	8.73978	0.1266	20.7496	14.6024	0.2331	15.783	0.0207	99.6593	2.57884	9.39996	23.4469
XAL 118A	Oxide 140	0.1409	0.4934	45.8709	4.64544	0.1103	19.1273	10.9337	0.1639	18.816	0.0177	100.32	1.00639	4.73979	20.5039
XAL 118A	Oxide 140	0.1645	0.5137	45.3023	5.09719	0.0934	18.7892	11.1855	0.2545	18.5021	0.0067	99.909	1.05509	5.2369	20.2816
XAL 118A	Oxide 140	0.0822	0.4996	43.7815	5.16476	0.1195	21.0908	10.7444	0.2135	18.6136	0.0303	100.34	1.02805	5.31629	22.8088
XAL 118A	Oxide 140	0.1174	0.4635	43.5993	5.02386	0.1553	21.2523	10.82	0.2506	18.5857	0.0025	100.27	0.954927	5.17753	23.0113
XAL 118A	Oxide 142	0.0984	0.4576	46.2968	5.20036	0.1153	18.4447	9.91207	0.1929	19.4738	-0.0051	100.187	0.929663	5.28492	19.6937
XAL 118A	Oxide 142	0.083	0.5191	46.4445	5.24061	0.1827	18.1515	9.74395	0.2106	19.6009	-0.0025	100.174	1.05343	5.31988	19.359
XAL 118A	Oxide 143	0.1193	0.3754	46.7903	5.65188	0.1054	17.3458	11.1438	0.2159	18.618	0.0338	100.4	0.763909	5.75315	18.5506
XAL 118A	Oxide 143	0.0809	11.1762	9.7801	27.5357	0.3222	11.0082	31.0189	0.5751	7.0108	0.1635	98.6715	29.0714	35.8289	15.0489
XAL 118A	Oxide 145	0.1108	0.4529	40.7054	5.27281	0.1165	24.2205	11.1619	0.1691	18.0274	0.0334	100.271	0.946084	5.50979	26.5905
XAL 118A	Oxide 145	0.0999	0.469	39.4335	5.24095	0.1399	25.4927	11.6901	0.3035	17.5087	0.0266	100.405	0.98631	5.51335	28.1755
XAL 118A	Oxide 145	0.0844	14.0855	6.6788	29.0102	0.4319	7.3235	34.0635	0.4177	6.6416	0.1252	98.8625	37.2215	38.3476	10.1708
XAL 118A	Oxide 145	0.0849	11.2975	8.9792	26.6849	0.3639	12.6792	31.8886	0.5133	6.9492	0.0451	99.4857	29.2783	34.5935	17.2691
XAL 118A	Oxide 145	0.0589	15.1526	6.0929	28.6499	0.4291	6.8686	35.5554	0.5878	6.487	0.0625	99.9449	39.7862	37.63	9.47826
XAL 118A	Oxide 145	0.0351	12.5757	8.1425	27.3728	0.3484	10.3315	32.7856	0.5242	6.7123	0.1031	98.9311	32.953	35.8796	14.2279
XAL 118A	Oxide 148	0.109	0.5664	42.2609	4.86402	0.148	21.3818	14.1631	0.3204	16.0988	0.0468	99.9592	1.19237	5.1221	23.6563
XAL 118A	Oxide 150	0.1092	0.6433	39.5039	4.4627	0.1501	24.9588	13.6265	0.2845	16.3142	0.0266	100.08	1.365	4.73675	27.8328
XAL 118A	Oxide 150	0.0904	0.6013	38.5904	5.65013	0.1469	24.2956	15.0993	0.2691	15.2269	0.0141	99.9842	1.29014	6.06416	27.3962
XAL 118A	Oxide 150	0.079	0.6143	39.8865	4.85881	0.1416	24.2522	14.3043	0.3506	15.9767	-0.0042	100.46	1.30079	5.14662	26.9894
XAL 118A	Oxide 150	0.0435	11.8597	7.2741	27.9885	0.3589	11.9479	32.258	0.509	6.6208	0.0782	98.9388	31.2295	36.8669	16.5348
XAL 118A	Oxide 150	0.0756	15.038	5.3833	29.0372	0.3692	7.0687	35.5017	0.5105	6.3246	0.0616	99.3706	39.8833	38.5231	9.85271
XAL 118A	Oxide 151	0.0778	0.6975	38.7413	5.98309	0.1438	23.3342	17.1641	0.3998	13.9009	0.0355	100.478	1.50213	6.44547	26.4102
XAL 118A	Oxide 151	0.0641	15.5461	5.244	29.0081	0.4075	5.7981	35.7336	0.5121	6.1469	0.1155	98.576	41.6227	38.8502	8.1585
XAL 118A	Oxide 152	0.0819	0.6007	40.633	4.71654	0.1233	23.9904	12.754	0.2168	17.0445	0.0142	100.175	1.26316	4.96123	26.5126
XAL 118A	Oxide 152	0.0953	0.6636	40.4937	5.05493	0.1334	23.311	14.4467	0.2933	15.9263	0.0349	100.453	1.40251	5.34417	25.8926
XAL 118A	Oxide 152	0.1305	15.2637	5.6372	29.0863	0.4302	5.975	35.5078	0.4772	6.2567	0.1395	98.904	40.6231	38.7228	8.35732
XAL 118A	Oxide 152	0.1075	16.5209	4.7629	28.9908	0.4537	4.4339	36.788	0.5096	5.9914	0.1376	98.6963	44.3238	38.9072	6.2518
XAL 118A	Oxide 153	0.1275	0.5173	39.3352	4.95425	0.1249	25.9448	10.2519	0.2145	18.564	-0.0108	100.024	1.08452	5.19564	28.5865
XAL 118A	Oxide 153	0.1153	0.5568	39.2756	5.10091	0.144	25.7405	10.106	0.2147	18.569	0.0117	99.8344	1.16928	5.35835	28.4087
XAL 118A	Oxide 154	0.117	0.665	35.8095	4.76663	0.1666	29.6026	11.0167	0.2677	17.7037	0.0157	100.131	1.41842	5.08582	33.184
XAL 118A	Oxide 154	0.1135	0.5837	34.8754	4.8311	0.1972	30.6714	10.8255	0.2421	17.7108	0.0041	100.055	1.2501	5.17568	34.5228
XAL 118A	Oxide 155	0.1168	0.5995	35.2658	4.40428	0.1134	30.7787	11.1066	0.1969	17.6778	-0.005	100.255	1.28018	4.7046	34.542
XAL 118A	Oxide 155	0.0551	0.5695	37.4373	4.77993	0.1515	28.3008	11.1527	0.2696	17.7085	0.0282	100.453	1.2046	5.0575	31.4603
XAL 118A	Oxide 155	0.1213	0.6098	39.8802	4.77757	0.1183	24.7042	13.1328	0.3139	16.6492	0.0474	100.355	1.28696	5.04372	27.4009
XAL 118A	Oxide 156	0.1222	0.5337	39.5993	5.90124	0.1182	23.6653	13.0507	0.258	16.6106	0.0258	99.8851	1.13229	6.26279	26.3868
XAL 118A	Oxide 157	0.0981	0.5836	42.3877	5.4277	0.1571	21.5	11.9552	0.2267	17.6555	0.0343	100.026	1.21657	5.65984	23.5546
XAL 118A	Oxide 159	0.0966	0.5617	43.8904	6.19433	0.1304	18.7666	13.9031	0.2848	16.6186	0.0143	100.461	1.16813	6.44387	20.511
XAL 118A	Oxide 159	0.0829	0.4975	46.1677	5.44092	0.1732	17.6604	12.2842	0.2223	17.9315	0.0059	100.467	1.01814	5.56996	18.9946
XAL 118A	Oxide 160	0.0716	0.5536	42.1909	6.47043	0.1613	20.5236	12.6427	0.2617	17.1741	0.0126	100.062	1.15833	6.77227	22.5686
XAL 118A	Oxide 160	0.0905	0.5364	42.6021	6.40938	0.184	20.1253	12.4987	0.2629	17.2546	0.0318	99.9955	1.12058	6.69787	22.0959
XAL 118A	Oxide 161	0.063	0.5805	38.8615	5.38704	0.1348	25.0798	12.7283	0.2206	16.82	-0.0025	99.8731	1.23353	5.72614	28.0083
XAL 118A	Oxide 161	0.0777	0.541	40.6082	5.42429	0.148	23.3666	12.9648	0.229	16.7583	0.0508	100.169	1.13996	5.71741	25.8763
XAL 118A	Oxide 162	0.0964	0.5537	39.9444	6.24094	0.1128	22.1121	15.4704	0.3413	14.8499	0.0781	99.8	1.18649	6.68968	24.9021
XAL 118A	Oxide 162	0.0491	0.6346	41.8513	7.45712	0.1024	18.9848	15.3161	0.3381	15.2633	0.0509	100.048	1.34515	7.9069	21.1491
XAL 118A	Oxide 162	0.0409	11.1257	8.6366	25.4041	0.3999	14.9107	30.8165	0.5155	7.2789	0.108	99.2368	28.8607	32.9648	20.3279
XAL 118A	Oxide 162	0.071	11.4309	9.7279	25.775	0.4236	12.8639	29.8994	0.5003	7.963	0.1692	98.8242	29.4724	33.243	17.4311
XAL 118A	Oxide 163	0.1167	0.5667	43.9748	5.38244	0.1419	20.0654	11.8168	0.2337	18.0622	0.0017	100.362	1.16884	5.55326	21.7504
XAL 118A	Oxide 163	0.0871	0.5568	42.9178	5.28871	0.1358	21.2896	11.5809	0.2326	18.027	0.0017	100.118	1.15519	5.48871	23.2134
XAL 118A	Oxide 163	0.082	0.5417	42.2358	5.20071	0.1417	22.1081	11.6344	0.1649	17.9474	-0.0008	100.056	1.12769	5.41574	24.1878
XAL 118A	Oxide 164	0.1134	0.5181	40.9956	5.64029	0.1355	22.9872	11.4919	0.1915	17.8683	0.0042	99.9459	1.08493	5.90818	25.2981
XAL 118A	Oxide 165	0.0727	0.5006	44.3066	6.32148	0.1371	18.8831	11.7613	0.2171	17.9289	0.037	100.166	1.03398	6.53141	20.498
XAL 118A	Oxide 165	0.0919	0.5555	44.0001	6.65584	0.1237	18.2717	12.2688	0.1867	17.6684	-0.0076	99.8151	1.15351	6.91363	19.9403
XAL 118A	Oxide 168	0.0711	0.514	46.1921	5.76766	0.1376	17.6051	11.2798	0.201	18.5539	0.0135	100.336	1.04923	5.88944	18.887
XAL 118A	Oxide 168	0.0803	0.5487	46.2568	5.5463	0.115	17.6915	11.2764	0.2156	18.4187	0.0701	100.219	1.12145	5.6704	19.0031
XAL 118A	Oxide 168	0.076	0.5531	42.1622	5.6532	0.1657	21.069	13.8403	0.2817	16.3742	0.0301	100.205	1.16121	5.93702	23.2471
XAL 118A	Oxide 168	0.0816	0.4916	45.3714	5.72859	0.1459	18.4934	11.3368	0.1788	18.3858	0.0287	100.243	1.00806	5.87609	19.93
XAL 118A	Oxide 168	0.076	0.5942	42.3154	5.69641	0.0937	21.1111	13.0576	0.254	16.9602	0.0209	100.18	1.24282	5.95993	23.206
XAL 118A	Oxide 169	0.1152	0.7022	39.8431	6.85694	0.1407	21.4664	16.1032	0.3427	14.7382	0.0373	100.346	1.50033	7.32862	24.1047
XAL 118A	Oxide 169	0.1174	0.6661	40.2515	6.77445	0.1104	21.2779	15.8231	0.3073	14.9331	0.0482	100.309	1.41972	7.22275	23.8346
XAL 118A	Oxide 169	0.1308	0.6758	41.3358	5.99645	0.1269	20.3932	16.6984	0.2744	14.4521	0.0616	100.145	1.44001	6.39155	22.8375
XAL 118A	Oxide 169	0.0674	0.651	39.7841	6.74525	0.1676	21.399	16.3134	0.3642	14.387	0.0523	99.9313	1.39869	7.24942	24.1629
XAL 118A	Oxide 169	0.1656	10.6026	11.4724	27.1447	0.3285	11.0303	29.6822	0.4646	7.9605	0.155	99.0064	27.0887	34.6918	14.8108
XAL 118A	Oxide 169	0.0855	13.3316	7.9222	28.1977	0.3692	8.3588	32.7698	0.5246	6.9074	0.1892	98.6561	35.0121	37.0438	11.5371
XAL 118A	Oxide 169	0.0634	12.1311	8.541	27.0897	0.404	11.2103	32.1088	0.4738	7.01	0.1149	99.1471	31.5908	35.2882	15.3424
XAL 118A	Oxide 169	0.1085	8.5423	16.4084	23.5938	0.2931	13.0671	27.2215	0.3476	8.9099	0.1297	98.622	21.2588	29.3716	17.0907
XAL 118A	Oxide 170	0.0825	0.7115	40.7996	5.69839	0.0941	21.5222	15.8677	0.3512	14.9474	0.0274	100.102	1.51521	6.07038	24.088
XAL 118A	Oxide 170	0.136	0.7056	41.4367	4.94046	0.1356	21.3946	15.8985	0.3214	15.1295	0	100.098	1.49693	5.24295	23.8541
XAL 118A	Oxide 170	0.1263	0.8859	39.6803	7.343	0.1734	20.7153	16.3914	0.3447	14.6482	0.0357	100.344	1.8953	7.85836	23.2916
XAL 118A	Oxide 170	0.1054	0.7183	38.9328	8.06561	0.1509	21.2615	16.0045	0.3707	14.6793	0.0356	100.325	1.54149	8.65842	23.9798
XAL 118A	Oxide 170	0.1451	1.0113	37.0691	9.57797	0.1446	21.1058	15.8662	0.3029	14.7274	0.0422	99.9925	2.19156	10.3827	24.0375
XAL 118A	Oxide 170	0.1322	0.7342	39.3785	8.06568	0.1454	20.671	15.4219	0.3057	14.9815	0.0814	99.9174	1.57487	8.65436	23.3027
XAL 118A	Oxide 170	0.1053	1.6336	36.3617	10.2302	0.1699	20.1656	16.3378	0.3844	14.5295	0.0784	99.9963	3.55482	11.1357	23.0621
XAL 118A	Oxide 170	0.1683	0.5783	41.5487	6.45392	0.1719	21.1683	12.5312	0.2988	17.3053	0.0059	100.23	1.21011	6.75556	23.2795
XAL 118A	Oxide 170	0.1062	0.6124	40.5939	6.19617	0.1509	21.8526	14.7596	0.3133	15.6621	0.03	100.277	1.29807	6.5698	24.3435
XAL 118A	Oxide 170	0.0779	16.2257	4.9625	28.9959	0.4748	4.847	36.3467	0.5942	6.0472	0.1381	98.7101	43.4712	38.8598	6.82475
XAL 118A	Oxide 170	0.1	12.3315	8.2682	26.8102	0.4142	11.149	32.7271	0.5427	6.8292	0.0642	99.2364	32.1621	34.9779	15.282
XAL 118A	Oxide 170	0.0365	13.8738	6.7275	27.9087	0.4274	8.7329	34.0235	0.4518	6.6079	0.0809	98.8708	36.6493	36.8786	12.124
XAL 118A	Oxide 170	0.0929	16.2968	4.9729	28.8092	0.5193	5.3593	36.8013	0.5145	6.1049	0.1135	99.5844	43.2747	38.2673	7.47921
XAL 118A	Oxide 170	0.0992	15.4412	5.4521	28.4481	0.46	6.6191	35.5911	0.5899	6.3001	0.1143	99.1151	41.0279	37.8109	9.24299
XAL 118A	Oxide 171	0.1092	0.5723	40.2878	4.73563	0.1761	24.8191	11.7463	0.2528	17.6965	0.0153	100.411	1.19817	4.95949	27.3084
XAL 118A	Oxide 171	0.106	0.5766	41.6144	4.62579	0.1135	23.522	11.1522	0.2855	18.1954	-0.0015	100.19	1.19981	4.8149	25.7232
XAL 118A	Oxide 171	0.1177	16.1384	5.1118	29.2265	0.5285	5.6378	36.4269	0.4754	6.3258	0.1557	100.145	42.5341	38.5318	7.80912
XAL 118A	Oxide 171	0.0789	12.3546	7.3859	27.8939	0.4096	11.2065	32.8332	0.4478	6.5527	0.1354	99.2985	32.4149	36.6091	15.4526
XAL 118A	Oxide 172	0.109	0.5357	40.5619	4.67265	0.1198	24.9953	10.6696	0.2342	18.4111	0.0107	100.32	1.11651	4.87156	27.3787
XAL 118A	Oxide 173	0.0802	0.5353	40.6058	4.68435	0.0904	24.9944	10.6971	0.2319	18.3635	0.013	100.296	1.11609	4.88557	27.3879
XAL 118A	Oxide 173	0.0904	0.587	38.7024	4.87031	0.1283	26.89	10.7513	0.248	18.1449	0.0312	100.444	1.23268	5.11604	29.6769
XAL 118A	Oxide 174	0.1802	0.6414	43.9523	6.00406	0.131	18.0009	15.4737	0.2952	15.6199	0.0414	100.34	1.34215	6.28469	19.7963
XAL 118A	Oxide 174	0.0874	14.2562	6.3622	28.4157	0.3557	7.9003	34.7386	0.5511	6.3753	0.0714	99.114	37.704	37.593	10.981
XAL 118A	Oxide 176	0.0924	0.5812	44.3595	4.96934	0.1355	20.1464	11.7418	0.2186	18.1254	0.0146	100.385	1.19634	5.11673	21.7943
XAL 118A	Oxide 176	0.0878	0.5858	41.3332	6.11969	0.1199	21.2651	14.8091	0.3655	15.7042	0.0153	100.406	1.23683	6.46329	23.5962
XAL 118A	Oxide 176	0.1435	0.6625	40.7969	6.17584	0.0744	21.383	15.0397	0.3537	15.6075	-0.003	100.234	1.40403	6.54713	23.8163
XAL 118A	Oxide 176	0.0949	0.5521	42.3597	5.16216	0.122	21.8406	12.1013	0.2179	17.5734	0.0245	100.049	1.1513	5.38477	23.9359
XAL 118A	Oxide 176	0.1234	0.5748	42.5366	4.45832	0.1707	21.5846	13.369	0.2764	16.8004	-0.0008	99.8935	1.2043	4.67254	23.7671
XAL 118A	Oxide 176	0.0795	14.983	5.7177	30.3419	0.3891	5.8198	34.5656	0.5075	6.6324	0.1675	99.204	39.6657	40.1813	8.09729
XAL 118A	Oxide 176	0.0643	15.6923	5.1287	30.1561	0.4483	4.8055	35.6379	0.5685	6.2028	0.1522	98.8566	41.9264	40.3033	6.74769
XAL 118A	Oxide 176	0.1081	15.1801	5.9031	28.9617	0.3701	5.8744	35.1751	0.567	6.4864	0.0777	98.7038	40.3622	38.5203	8.20879
XAL 118A	Oxide 178	0.096	0.6392	41.1102	5.94499	0.128	21.1528	16.2809	0.3933	14.685	0.0441	100.475	1.35799	6.31794	23.618
XAL 118A	Oxide 178	0.0814	15.1376	5.6586	28.2875	0.4182	7.238	35.2925	0.4893	6.3071	0.1426	99.0529	40.2032	37.5806	10.1027
XAL 118A	Oxide 178	0.0892	16.1088	5.2674	28.1648	0.4884	5.8732	36.557	0.4618	6.1995	0.0994	99.3094	42.7878	37.4222	8.19874
XAL 118A	Oxide 178	0.0866	13.0606	6.9535	26.5003	0.4866	11.3395	33.7622	0.4842	6.4222	0.0814	99.1769	34.3861	34.9008	15.6902
XAL 118A	Oxide 179	0.1056	0.6132	41.0072	5.49782	0.1335	21.6159	16.5811	0.3376	14.4159	0.0753	100.383	1.30596	5.85712	24.1945
XAL 118A	Oxide 179	0.0698	12.6619	7.0592	27.2789	0.3934	11.6555	33.0122	0.5509	6.6565	0.0886	99.427	33.1988	35.7779	16.0609
XAL 118A	Oxide 179	0.0883	14.1172	6.5182	27.7073	0.3679	8.8441	34.5438	0.5088	6.3128	0.1386	99.147	37.3001	36.6202	12.2809
XAL 118A	Oxide 179	0.1181	15.9174	5.2777	27.9158	0.4147	6.4984	36.1301	0.5598	6.2005	0.1396	99.1721	42.3215	37.1282	9.08052
XAL 118A	Oxide 179	0.1567	16.7509	5.0564	27.4993	0.4137	5.2587	37.4328	0.5207	5.9607	0.1057	99.1553	44.6572	36.6724	7.36796
XAL 118A	Oxide 179	0.0609	9.6323	13.2406	25.2864	0.2883	13.133	29.915	0.4484	7.7477	0.0675	99.82	24.266	31.8654	17.3879
XAL 118A	Oxide 179	0.0839	14.8984	5.6915	28.2513	0.4907	7.4152	35.0288	0.5108	6.3016	0.1334	98.8056	39.6557	37.6157	10.373
XAL 118A	Oxide 180	0.047	0.6783	27.5963	5.05401	0.1327	37.4148	14.2524	0.3188	14.6039	0.0378	100.136	1.52192	5.67244	44.1192
XAL 118A	Oxide 182	0.1025	0.6348	41.2723	4.91743	0.1016	21.8019	15.2398	0.3074	15.3287	0.0313	99.7377	1.34971	5.23008	24.3621
XAL 118A	Oxide 187	0.0862	0.6466	42.9788	4.8141	0.1237	20.8835	14.0081	0.3154	16.4643	0.0145	100.335	1.35101	5.03156	22.9319
XAL 118A	Oxide 187	0.0952	15.1931	5.5711	28.6819	0.438	7.0862	35.4989	0.5389	6.2821	0.1376	99.5229	40.2006	37.9629	9.85406
XAL 118A	Oxide 187	0.0265	14.1368	7.0944	28.9118	0.4275	7.2608	34.2877	0.5051	6.5027	0.1458	99.2992	37.1743	38.0305	10.0344
XAL 118A	Oxide 187	0.1591	12.8285	6.9754	27.8786	0.4337	10.6695	33.1337	0.4703	6.5594	0.1687	99.2768	33.7162	36.6521	14.7374
XAL 118A	Oxide 187	0.1145	16.4763	4.4897	30.6744	0.4825	3.5632	36.4826	0.5125	6.0585	0.1935	99.0477	44.1202	41.0884	5.01457
XAL 118A	Oxide 192	0.1151	0.5226	42.7232	4.99618	0.1507	21.9251	11.4401	0.2016	18.2128	-0.0207	100.267	1.08249	5.17674	23.8677
XAL 118A	Oxide 192	0.09	0.5947	42.6819	5.02123	0.1047	21.7347	11.533	0.2417	18.0271	0.0061	100.035	1.23551	5.21824	23.7311

## Sheet: TableS7.Plagioclasecompositions
TABLE S7. COMPOSITION OF INDIVIDUAL PLAGIOCLASE ANALYSES PER SAMPLE
Sample	Crystal	SiO2	TiO2	Al2O3	FeO	MnO	MgO	CaO	Na2O	K2O	Total	An
XAL 107	PLAG 1	61.0714	0.002	24.1084	0.1433	0.0247	0.0314	5.4909	7.9069	0.935	99.7141	26.2557
XAL 107	PLAG 1	59.6075	0.0288	24.4047	0.1882	-0.0269	-0.0125	5.5858	7.9212	0.8963	98.5931	26.6152
XAL 107	PLAG 1	60.8173	0.0171	24.2355	0.2631	0.0081	-0.0299	5.4135	7.8147	0.8565	99.3959	26.3113
XAL 107	PLAG 1	59.5022	0.0141	24.4886	0.2388	0.0351	0.0178	5.4806	8.0548	0.8668	98.6986	25.9882
XAL 107	PLAG 1	60.4036	-0.0037	24.4147	0.2134	0.017	0.0218	5.6586	8.127	0.7689	99.6213	26.5899
XAL 107	PLAG 1	59.4892	0.0032	25.487	0.1733	0.024	0.0135	5.4433	7.8331	0.8142	99.2808	26.439
XAL 107	PLAG 1	60.593	0.0049	23.9321	0.2603	-0.0613	-0.0262	5.4167	7.9362	0.9138	98.9695	25.9592
XAL 107	PLAG 1	60.3637	-0.0142	24.3824	0.1656	0.045	-0.0036	5.2956	8.0017	0.8014	99.0377	25.5456
XAL 107	PLAG 1	59.7522	0.0292	24.7436	0.1462	0.0111	0.0048	5.8009	7.9767	0.7542	99.2188	27.4484
XAL 107	PLAG 1	60.7467	0.0338	23.8646	0.1961	-0.0281	0.0339	5.6587	8.009	0.7735	99.2883	26.8529
XAL 107	PLAG 1	60.4479	0.0285	24.2371	0.2708	-0.0122	0.0318	5.4541	8.0256	0.8011	99.2847	26.0574
XAL 107	PLAG 1	50.0059	0.0599	30.5588	0.4561	0.0059	0.1528	13.7437	3.4447	0.1772	98.6051	68.0773
XAL 107	PLAG 1	50.1976	0.1179	30.3299	0.4951	-0.0107	0.1406	13.7707	3.7275	0.2501	99.0187	66.1612
XAL 107	PLAG 1	49.2537	0.076	31.466	0.5578	0.0166	0.102	14.0043	3.3997	0.2438	99.1199	68.4912
XAL 107	PLAG 1	51.7843	0.0454	29.4398	0.4386	-0.0007	0.0684	12.1315	4.5898	0.3828	98.8799	58.0641
XAL 107	PLAG 1	55.4362	0.3667	25.2582	1.111	-0.0313	0.5971	9.5	5.6327	1.1657	99.0365	45.0636
XAL 107	PLAG 1	53.2083	0.0246	28.7498	0.4838	-0.0369	0.0835	11.5211	5.044	0.4778	99.556	54.2987
XAL 107	PLAG 1	57.1713	0.6862	15.1203	6.8059	0.0525	3.8247	6.3846	4.8559	4.2705	99.172	31.5181
XAL 107	PLAG 1	57.2591	0.0541	25.2477	0.6066	0.0431	0.0571	7.1977	5.6989	2.7793	98.9435	34.5716
XAL 107	PLAG 1	54.3214	0.3709	25.4628	2.139	0.057	0.6335	8.9785	5.0993	1.89	98.9523	43.8902
XAL 107	PLAG 1	53.4747	0.135	27.6018	1.0013	-0.0066	0.4066	10.9875	5.0168	0.7502	99.3672	52.4236
XAL 107	PLAG 1	52.7509	0.1791	26.7283	2.5133	0.0768	0.7078	9.6317	4.7931	1.2696	98.6506	48.6025
XAL 107	PLAG 1	50.9053	0.1119	30.1701	0.5227	0.0048	0.126	12.8916	4.1129	0.3425	99.1878	62.1518
XAL 107	PLAG 1	49.7099	0.0904	30.8815	0.5326	0.0276	0.167	14.1693	3.3741	0.1937	99.1462	69.0986
XAL 107	PLAG 2	49.6564	0.1108	31.1385	0.4983	-0.031	0.1574	14.0869	3.4709	0.1958	99.2841	68.3788
XAL 107	PLAG 2	50.1005	0.1316	30.5589	0.5381	0.0077	0.2108	13.7885	3.7245	0.2293	99.29	66.2853
XAL 107	PLAG 2	50.4888	0.1012	30.4797	0.5282	0.0015	0.1758	13.7188	3.5168	0.2357	99.2464	67.3692
XAL 107	PLAG 2	50.5758	0.1064	30.5327	0.3908	-0.0063	0.1768	13.5922	3.7843	0.2148	99.3677	65.6753
XAL 107	PLAG 2	50.2293	0.0514	30.7423	0.4087	0.031	0.1445	14.1346	3.5337	0.2438	99.5192	67.8909
XAL 107	PLAG 2	50.0671	0.1042	30.8398	0.3966	0.0059	0.124	14.1367	3.3613	0.1855	99.2209	69.1612
XAL 107	PLAG 2	50.3949	0.0844	30.8312	0.426	-0.0041	0.1424	13.6771	3.6035	0.2503	99.4057	66.7299
XAL 107	PLAG 2	50.064	0.0922	30.6292	0.4815	-0.0122	0.1269	13.9141	3.5266	0.2564	99.0788	67.5404
XAL 107	PLAG 2	50.286	0.1142	30.2498	0.5896	0.0409	0.1402	14.0004	3.5763	0.2812	99.2786	67.2867
XAL 107	PLAG 3	50.4457	0.0775	30.6554	0.5354	0.007	0.18	14.1869	3.3853	0.198	99.6712	69.0402
XAL 107	PLAG 3	50.2903	0.0565	30.7962	0.5076	0.0295	0.2316	13.8674	3.4303	0.196	99.4054	68.2843
XAL 107	PLAG 3	50.9225	0.1019	30.0151	0.5402	0.0029	0.1695	13.7749	3.7495	0.2564	99.5329	66.0172
XAL 107	PLAG 3	50.6247	0.1096	31.1403	0.4337	0.0118	0.1596	14.1244	3.4503	0.2271	100.281	68.4371
XAL 107	PLAG 3	50.5401	0.0946	31.174	0.5154	-0.0214	0.1929	13.7649	3.4261	0.1918	99.8784	68.1657
XAL 107	PLAG 3	50.086	0.0757	30.7144	0.4731	-0.0015	0.1948	14.2524	3.3318	0.3042	99.4309	69.0389
XAL 107	PLAG 3	50.1687	0.0942	31.1024	0.4044	0.0476	0.1276	13.853	3.2928	0.1626	99.2533	69.2463
XAL 107	PLAG 3	50.6252	0.0774	31.0893	0.5008	0.0063	0.1482	14.0633	3.4709	0.1814	100.163	68.3996
XAL 107	PLAG 4	49.9925	0.0947	30.9582	0.4905	-0.0041	0.1587	14.1366	3.3397	0.227	99.3938	69.1257
XAL 107	PLAG 4	50.1207	0.0721	30.9401	0.3847	-0.0424	0.1444	13.7881	3.2869	0.1731	98.8677	69.1398
XAL 107	PLAG 4	49.4645	0.0864	30.9334	0.4063	0.0321	0.1409	14.0341	3.5526	0.2188	98.8692	67.7206
XAL 107	PLAG 4	50.063	0.0842	31.0884	0.4985	-0.0166	0.1463	13.8934	3.4998	0.2085	99.4656	67.8559
XAL 107	PLAG 4	49.9715	0.1198	30.8666	0.4732	0.0066	0.132	14.0322	3.5396	0.2188	99.3603	67.7948
XAL 107	PLAG 4	50.2508	0.1075	30.4955	0.4312	-0.0343	0.1831	13.9451	3.4728	0.2585	99.1101	67.9014
XAL 107	PLAG 4	49.7257	0.0506	30.8313	0.4932	0.0147	0.1738	14.3742	3.2774	0.2145	99.1554	69.9121
XAL 107	PLAG 4	49.8887	0.1124	30.9696	0.4012	-0.0122	0.1518	14.2079	3.2312	0.1833	99.1339	70.0815
XAL 107	PLAG 4	50.5363	0.0966	30.7049	0.4543	-0.0225	0.1822	14.1462	3.3655	0.2272	99.6907	68.982
XAL 107	PLAG 4	49.8231	0.0967	30.7445	0.5003	-0.0295	0.1592	13.7673	3.4909	0.2022	98.7547	67.7347
XAL 107	PLAG 4	49.777	0.0734	30.6924	0.4287	0.0243	0.1601	14.1557	3.4362	0.2229	98.9708	68.5849
XAL 107	PLAG 4	50.1479	0.0759	30.3882	0.4165	-0.0077	0.1409	13.697	3.6233	0.2148	98.6967	66.7837
XAL 107	PLAG 5	50.184	0.0463	30.6556	0.4338	-0.0033	0.1446	14.1468	3.2853	0.2271	99.1202	69.475
XAL 107	PLAG 5	50.4918	0.076	30.5731	0.3722	0.0118	0.1625	14.035	3.5803	0.2293	99.5319	67.5178
XAL 107	PLAG 5	50.0771	0.1073	30.611	0.4689	-0.0092	0.1782	14.083	3.569	0.2063	99.2916	67.7485
XAL 107	PLAG 5	51.502	0.1405	30.1698	0.5024	0.0059	0.2105	13.4177	3.9458	0.3088	100.203	64.1204
XAL 107	PLAG 5	51.4728	0.1215	29.9663	0.5741	-0.0464	0.2075	13.3007	3.9005	0.3152	99.8121	64.1485
XAL 107	PLAG 5	51.0308	0.0855	30.2149	0.7435	-0.0158	0.1273	13.7093	3.6716	0.2752	99.8422	66.2888
XAL 107	PLAG 5	50.8994	0.1083	30.4088	0.4112	0.0512	0.1631	13.7922	3.6592	0.1814	99.6749	66.8553
XAL 107	PLAG 5	50.2248	0.1052	31.1025	0.4362	-0.056	0.1618	14.6368	3.2401	0.2103	100.062	70.5361
XAL 107	PLAG 5	50.3187	0.1137	30.8154	0.4779	-0.0229	0.1341	13.6994	3.6171	0.2106	99.364	66.8401
XAL 107	PLAG 6	50.2802	0.1089	30.3814	0.5742	0.0426	0.1828	13.7494	3.59	0.2695	99.1791	66.8522
XAL 107	PLAG 6	49.3329	0.0543	30.8831	0.4866	-0.0004	0.1668	14.3804	3.1324	0.2077	98.6437	70.8531
XAL 107	PLAG 6	49.8657	0.0627	30.7509	0.4495	0.047	0.11	13.6694	3.6113	0.2471	98.8134	66.6838
XAL 107	PLAG 6	50.897	0.0963	30.1635	0.3899	-0.04	0.1793	13.8034	3.6356	0.2574	99.3823	66.7187
XAL 107	PLAG 6	50.4142	0.0988	30.5521	0.404	0.0113	0.15	13.9265	3.6484	0.241	99.4463	66.904
XAL 107	PLAG 6	50.1187	0.0987	30.6639	0.421	0.0233	0.1815	13.7064	3.556	0.2039	98.9736	67.2393
XAL 107	PLAG 6	50.0768	0.0879	30.6223	0.4117	-0.0011	0.1745	13.7667	3.5069	0.2348	98.8805	67.5095
XAL 107	PLAG 6	50.2639	0.0737	30.5616	0.4943	0.0127	0.1567	13.9909	3.5745	0.2574	99.3858	67.3739
XAL 107	PLAG 6	52.2592	0.1384	29.318	0.6928	0.0328	0.1457	12.9576	4.146	0.3467	100.037	62.0781
XAL 107	PLAG 7	51.0201	0.1591	29.8014	0.5944	-0.0051	0.1407	13.3538	3.8389	0.2762	99.1796	64.732
XAL 107	PLAG 7	49.8836	0.0901	30.6833	0.5852	0.0539	0.179	13.9398	3.2864	0.2017	98.9029	69.2586
XAL 107	PLAG 7	50.3381	0.0269	29.9733	0.539	0.0182	0.216	13.4654	3.8453	0.2803	98.7025	64.8699
XAL 107	PLAG 7	50.0524	0.0766	30.3354	0.4671	0.0029	0.1419	13.7801	3.7692	0.2203	98.846	66.0493
XAL 107	PLAG 7	50.6577	0.0765	30.1517	0.456	0.0364	0.1352	13.2756	3.8864	0.2372	98.9127	64.4725
XAL 107	PLAG 7	49.2403	0.0694	31.0348	0.4186	-0.0222	0.1175	14.2717	3.3327	0.1708	98.6335	69.5982
XAL 107	PLAG 7	49.9575	0.1264	30.519	0.4727	-0.0222	0.1282	13.9143	3.4398	0.2717	98.8072	67.9993
XAL 107	PLAG 7	50.2436	0.0946	30.6111	0.453	-0.0546	0.1579	13.7906	3.623	0.2039	99.123	66.9786
XAL 107	PLAG 8	49.695	0.1104	30.66	0.6184	0.0095	0.1695	13.9263	3.5643	0.2819	99.0353	67.2385
XAL 107	PLAG 8	49.8251	0.0938	30.6233	0.5807	0.0164	0.1423	14.0603	3.3403	0.2614	98.9436	68.8678
XAL 107	PLAG 8	49.9645	0.0914	30.9408	0.5142	-0.0262	0.1578	14.2186	3.2912	0.2037	99.3561	69.6402
XAL 107	PLAG 8	49.136	0.0745	31.0294	0.5209	0.0357	0.1149	14.5315	3.3869	0.185	99.0147	69.5925
XAL 107	PLAG 8	49.7228	0.0793	30.6713	0.5218	-0.0153	0.1258	14.1605	3.5611	0.2202	99.0475	67.8606
XAL 107	PLAG 8	49.7308	0.0889	31.1197	0.4701	-0.0091	0.1389	14.2578	3.239	0.1831	99.2193	70.1065
XAL 107	PLAG 8	50.0797	0.1119	30.9686	0.5137	-0.0047	0.144	13.8171	3.6614	0.2471	99.5387	66.6305
XAL 107	PLAG 9	50.5557	0.0625	30.3956	0.6486	-0.0106	0.1243	13.7277	3.6849	0.1607	99.3494	66.6799
XAL 107	PLAG 9	50.0841	0.0904	30.6527	0.5153	0.0131	0.1161	13.8857	3.5294	0.1997	99.0866	67.7003
XAL 107	PLAG 9	50.2175	0.1044	30.9521	0.4038	0.0474	0.1384	13.9899	3.5929	0.2431	99.6895	67.3205
XAL 107	PLAG 9	49.9321	0.0942	30.8807	0.4772	0.0306	0.1601	14.1911	3.6239	0.2264	99.6164	67.517
XAL 107	PLAG 9	50.0873	0.0917	31.1239	0.3968	0.0503	0.1381	14.1356	3.4298	0.2182	99.6715	68.6126
XAL 107	PLAG 9	50.2405	0.1055	30.8477	0.4382	0.0077	0.1403	14.0416	3.7133	0.2451	99.7799	66.6952
XAL 107	PLAG 9	50.3958	0.1112	30.4941	0.4135	-0.0266	0.1798	14.2861	3.3086	0.1955	99.3579	69.6675
XAL 107	PLAG 9	49.5023	0.0458	31.2144	0.4405	0.0047	0.1636	14.332	3.2476	0.1646	99.1156	70.2381
XAL 107	PLAG 9	50.0318	0.1224	30.7356	0.5449	-0.0146	0.1543	14.0826	3.4219	0.2264	99.3052	68.547
XAL 107	PLAG 9	50.3905	0.1095	30.656	0.5435	0.0127	0.1439	14.1442	3.6187	0.2387	99.8579	67.4271
XAL 107	PLAG 10	50.1028	0.1028	30.4757	0.5391	-0.0051	0.1097	13.8008	3.5144	0.2348	98.875	67.5185
XAL 107	PLAG 10	49.9345	0.1018	30.6768	0.5127	0.0109	0.1406	14.156	3.3475	0.1934	99.0742	69.2421
XAL 107	PLAG 10	49.7412	0.0871	30.6191	0.3993	0.0317	0.1278	14.3127	3.4251	0.2428	98.9867	68.8111
XAL 107	PLAG 10	49.8643	0.0991	30.7121	0.4623	-0.0055	0.1381	14.2049	3.4363	0.2099	99.1214	68.7124
XAL 107	PLAG 10	50.1178	0.0791	30.5974	0.4874	-0.0262	0.1705	14.2983	3.4181	0.1811	99.3234	69.0753
XAL 107	PLAG 10	50.4071	0.0876	30.7127	0.5114	0.0189	0.1237	13.6443	3.5168	0.2555	99.2782	67.1714
XAL 107	PLAG 10	50.7565	0.1141	30.2162	0.5286	0.1912	0.1562	13.3485	3.6959	0.2701	99.2773	65.5682
XAL 107	PLAG 10	50.5551	0.0901	30.4721	0.4874	-0.0244	0.137	13.0522	3.687	0.262	98.7184	65.1431
XAL 107	PLAG 11	50.3121	0.1189	30.694	0.5402	0.0248	0.1289	13.8288	3.5529	0.2884	99.4889	67.1243
XAL 107	PLAG 11	49.3778	0.1079	30.5895	0.6591	0.0186	0.1479	13.9705	3.3639	0.2655	98.5006	68.5701
XAL 107	PLAG 11	50.5831	0.1354	30.6019	0.5948	-0.0051	0.0755	13.6109	3.7187	0.3254	99.6405	65.6656
XAL 107	PLAG 11	49.9684	0.0874	30.7813	0.4794	0.0386	0.1644	14.0865	3.4693	0.212	99.2874	68.3252
XAL 107	PLAG 11	49.8745	0.0841	30.6404	0.48	0.0291	0.1474	13.7633	3.3653	0.2018	98.586	68.4961
XAL 107	PLAG 11	49.955	0.1086	30.328	0.593	-0.0124	0.1609	13.8298	3.447	0.2883	98.6982	67.7572
XAL 107	PLAG 11	50.1418	0.0871	30.8867	0.5253	0.0015	0.1422	14.151	3.3665	0.1915	99.4935	69.1265
XAL 107	PLAG 11	50.142	0.1065	30.8165	0.5385	0.02	0.1607	13.8224	3.4235	0.276	99.3061	67.9354
XAL 107	PLAG 11	49.7807	0.1318	30.9344	0.5532	-0.0612	0.1142	13.9652	3.5683	0.2511	99.2378	67.3951
XAL 107	PLAG 12	50.0986	0.0959	30.4537	0.4462	-0.0262	0.1127	13.8765	3.3006	0.2125	98.5705	69.0291
XAL 107	PLAG 12	50.1044	0.1141	30.8587	0.4536	0.014	0.1154	14.1407	3.2863	0.2373	99.3244	69.4188
XAL 107	PLAG 12	50.5591	0.1224	30.8187	0.4584	0.0317	0.1315	13.6681	3.458	0.2126	99.4604	67.7344
XAL 107	PLAG 12	49.9525	0.1474	30.8823	0.5244	0.0206	0.1404	14.1446	3.4786	0.1936	99.4844	68.4303
XAL 107	PLAG 12	49.694	0.0814	30.7856	0.4289	-0.0129	0.165	14.1826	3.3435	0.1831	98.8512	69.3477
XAL 107	PLAG 12	49.9862	0.1022	30.7197	0.4925	0.0232	0.1937	14.0335	3.407	0.204	99.162	68.651
XAL 107	PLAG 12	49.7992	0.116	30.9664	0.4831	-0.0066	0.1849	14.2964	3.3991	0.1997	99.4382	69.1132
XAL 107	PLAG 13	51.0588	0.1055	30.608	0.5201	-0.0029	0.1485	13.8085	3.7349	0.2521	100.233	66.1727
XAL 107	PLAG 13	50.0949	0.1089	31.0124	0.4112	0.0055	0.1615	14.0334	3.3764	0.2145	99.4187	68.7944
XAL 107	PLAG 13	49.9829	0.0843	30.8101	0.5201	-0.0048	0.1478	14.3295	3.4788	0.1601	99.5089	68.8409
XAL 107	PLAG 13	50.0651	0.0875	30.5367	0.5323	0.0048	0.1545	13.6447	3.5926	0.2896	98.9078	66.5892
XAL 107	PLAG 13	50.3493	0.1301	30.8446	0.5645	0.0048	0.1535	13.865	3.662	0.279	99.8529	66.5808
XAL 107	PLAG 13	50.054	0.0954	30.5456	0.5229	0.0457	0.1367	13.7444	3.6933	0.1937	99.0318	66.5315
XAL 107	PLAG 13	51.3787	0.1172	30.0334	0.6194	-0.0361	0.1003	13.0194	4.0507	0.3212	99.6042	62.7976
XAL 107	PLAG 14	49.9502	0.0971	30.8382	0.5003	-0.0615	0.1678	13.9903	3.3627	0.2145	99.0595	68.813
XAL 107	PLAG 14	49.7411	0.108	30.9692	0.3761	-0.0007	0.1447	14.133	3.3472	0.2206	99.0392	69.1007
XAL 107	PLAG 14	49.9489	0.1071	30.5745	0.5248	0.0269	0.1521	14.3451	3.4223	0.235	99.3367	68.9079
XAL 107	PLAG 14	49.7535	0.0849	30.819	0.461	-0.0239	0.149	14.058	3.5177	0.2559	99.0752	67.8195
XAL 107	PLAG 14	49.6823	0.1012	30.5188	0.4501	-0.0203	0.1604	14.0728	3.423	0.2477	98.6361	68.4403
XAL 107	PLAG 14	49.9437	0.0793	30.6077	0.4059	0.0239	0.1444	13.8612	3.3271	0.2291	98.6223	68.7747
XAL 107	PLAG 14	48.9019	0.0926	31.2534	0.4745	0.0306	0.1283	14.7881	3.161	0.2347	99.0651	71.138
XAL 107	PLAG 14	49.3801	0.0793	31.0233	0.5353	0.0206	0.1611	14.0833	3.3596	0.2248	98.8674	68.9323
XAL 107	PLAG 14	49.305	0.0999	31.102	0.4777	0.0103	0.1605	14.1955	3.2154	0.2705	98.8368	69.8037
XAL 107	PLAG 14	50.299	0.1108	30.9213	0.4213	0.0188	0.1155	14.2405	3.6008	0.2394	99.9673	67.6785
XAL 107	PLAG 14	49.8954	0.0529	30.558	0.3881	0.0335	0.1667	14.3779	3.4917	0.1976	99.1619	68.6889
XAL 107	PLAG 14	50.2482	0.0672	30.6864	0.3862	-0.0029	0.1534	14.3522	3.5658	0.2393	99.6958	68.0521
XAL 107	PLAG 14	49.7425	0.1261	30.8138	0.3398	0.0225	0.1971	14.0726	3.5467	0.2248	99.0858	67.7916
XAL 107	PLAG 14	49.9109	0.0821	30.9309	0.5077	0.0026	0.1683	14.436	3.1632	0.2392	99.4408	70.6097
XAL 107	PLAG 14	49.742	0.0947	30.8045	0.577	0.0177	0.1194	14.1413	3.2495	0.2248	98.9708	69.6985
XAL 107	PLAG 15	50.1937	0.1109	30.0753	0.5947	-0.0162	0.1356	14.0009	3.3869	0.2248	98.7067	68.6402
XAL 107	PLAG 15	50.0708	0.0613	31.1089	0.5371	0.0265	0.161	14.3061	3.461	0.2122	99.9449	68.7071
XAL 107	PLAG 15	49.4085	0.1158	30.682	0.6059	0.0092	0.1863	13.9448	3.4037	0.231	98.5872	68.4257
XAL 107	PLAG 15	49.7494	0.0822	30.9023	0.564	-0.0324	0.1646	14.002	3.4014	0.2477	99.0813	68.4625
XAL 107	PLAG 15	50.4599	0.0766	30.7033	0.5815	0.0155	0.1619	13.3124	3.4105	0.3085	99.0301	67.0603
XAL 107	PLAG 15	50.7587	0.0977	31.0623	0.4233	0.0214	0.1685	14.1963	3.4367	0.2124	100.377	68.6864
XAL 107	PLAG 15	50.1058	0.0991	31.0156	0.4457	0.0236	0.1868	14.0967	3.3509	0.2144	99.5385	69.0482
XAL 107	PLAG 15	49.9661	0.1324	30.4668	0.5989	0.0122	0.1341	13.8817	3.528	0.2269	98.947	67.5966
XAL 107	PLAG 16	50.5506	0.1399	30.5101	0.6305	0.0427	0.1687	13.7624	3.4862	0.2833	99.5745	67.4347
XAL 107	PLAG 16	49.6324	0.0614	31.2902	0.4704	0.011	0.123	14.5528	3.1553	0.183	99.4796	71.0568
XAL 107	PLAG 16	50.2818	0.0653	30.6835	0.5452	0.0177	0.139	13.9619	3.4549	0.2728	99.4221	67.9774
XAL 107	PLAG 16	50.0479	0.1005	30.254	0.5225	0.0015	0.1292	13.6322	3.7385	0.2437	98.67	65.895
XAL 107	PLAG 16	50.2341	0.0671	31.3117	0.4676	0.0029	0.1532	14.1762	3.4627	0.1811	100.057	68.6232
XAL 107	PLAG 16	50.3204	0.0787	30.6062	0.4483	0.0379	0.1148	14.0552	3.3201	0.252	99.2337	69.0221
XAL 107	PLAG 16	49.9181	0.0983	30.5876	0.4115	0.0022	0.1474	13.9135	3.3882	0.2562	98.7229	68.3715
XAL 107	PLAG 16	49.8647	0.0813	31.2383	0.3658	0.0247	0.1685	14.2142	3.3666	0.1374	99.4615	69.4384
XAL 107	PLAG 16	50.2278	0.151	29.8287	0.4956	0.0133	0.1115	13.7309	3.9233	0.2624	98.7445	64.9423
XAL 107	PLAG 17	50.9364	0.0915	29.584	0.6609	0.0107	0.1666	13.3843	3.911	0.2335	98.979	64.5344
XAL 107	PLAG 17	50.0575	0.0911	30.8372	0.3735	-0.0018	0.1499	14.0142	3.4249	0.2229	99.1694	68.4377
XAL 107	PLAG 17	50.4687	0.0974	30.65	0.4538	0.0162	0.1575	13.6516	3.5444	0.2626	99.3022	66.9901
XAL 107	PLAG 17	50.5542	0.0949	30.4878	0.3816	0.0273	0.1683	13.7142	3.5139	0.2272	99.1693	67.4131
XAL 107	PLAG 17	49.7786	0.135	30.5927	0.4775	0.0029	0.1841	14.2235	3.4091	0.154	98.9574	69.1266
XAL 107	PLAG 17	50.9009	0.1295	30.4604	0.6049	-0.0158	0.1345	13.7506	3.6586	0.2417	99.8653	66.5595
XAL 107	PLAG 17	50.1698	0.0907	30.5147	0.6416	0.0173	0.1627	13.845	3.4802	0.227	99.149	67.8233
XAL 107	PLAG 18	49.5739	0.1228	30.6361	0.5915	-0.0217	0.1941	14.285	3.3334	0.2371	98.9523	69.3452
XAL 107	PLAG 18	50.069	0.0705	30.8301	0.5794	0.0033	0.1224	14.0236	3.2846	0.2144	99.1973	69.3452
XAL 107	PLAG 18	49.7791	0.1006	30.838	0.3738	0.0221	0.1521	14.2432	3.4483	0.1956	99.1528	68.7537
XAL 107	PLAG 18	49.8114	0.1183	30.2245	0.6274	-0.0048	0.1651	13.9178	3.4255	0.2332	98.5184	68.244
XAL 107	PLAG 18	50.109	0.077	30.6014	0.5278	-0.0365	0.1388	13.8567	3.5761	0.2478	99.0981	67.1904
XAL 107	PLAG 18	49.6429	0.086	30.8691	0.4658	-0.0258	0.1228	14.3364	3.4355	0.2559	99.1886	68.733
XAL 107	PLAG 19	50.2604	0.0978	30.5686	0.4981	0.0243	0.1431	13.7504	3.3356	0.2333	98.9118	68.531
XAL 107	PLAG 19	49.7921	0.1015	30.6475	0.4063	0.0063	0.1292	13.6643	3.5496	0.2479	98.5447	67.0377
XAL 107	PLAG 19	49.9624	0.104	30.5481	0.4252	-0.0173	0.1536	13.714	3.5442	0.2437	98.6779	67.1667
XAL 107	PLAG 19	49.6781	0.1321	30.5271	0.4337	0.0088	0.143	13.9448	3.5235	0.2352	98.6263	67.6894
XAL 107	PLAG 19	49.2876	0.0638	30.7912	0.4921	0.0088	0.1109	14.3047	3.4387	0.1352	98.6331	69.1434
XAL 107	PLAG 19	49.7242	0.0815	30.5004	0.4408	0.0283	0.1654	13.8888	3.5574	0.1728	98.5596	67.6441
XAL 107	PLAG 19	49.2063	0.1119	30.883	0.5124	-0.0685	0.1328	14.3576	3.3383	0.1976	98.6714	69.5827
XAL 107	PLAG 19	50.1357	0.1273	30.5722	0.4829	0.0144	0.1621	14.1871	3.5846	0.2747	99.5409	67.5552
XAL 107	PLAG 20	50.0788	0.0801	31.0532	0.4827	0.0302	0.1422	13.8323	3.3989	0.2042	99.3027	68.3885
XAL 107	PLAG 20	50.1056	0.0833	31.0126	0.446	-0.0033	0.1641	14.1866	3.256	0.1458	99.3967	70.0499
XAL 107	PLAG 20	50.4292	0.0972	30.8202	0.364	0.0077	0.1142	13.9945	3.6462	0.2145	99.6876	67.1253
XAL 107	PLAG 20	49.6636	0.0664	31.078	0.4333	-0.025	0.1551	14.3172	3.4498	0.2018	99.3402	68.8314
XAL 107	PLAG 20	49.9181	0.0779	30.8341	0.4259	-0.014	0.1068	13.6946	3.5273	0.175	98.7457	67.507
XAL 107	PLAG 20	50.1295	0.0851	30.8282	0.4526	-0.0055	0.1636	14.3256	3.3287	0.179	99.4868	69.6692
XAL 107	PLAG 20	50.3274	0.0825	30.6323	0.503	-0.0162	0.1187	13.9245	3.524	0.2437	99.3399	67.6215
XAL 107	PLAG 20	50.4854	0.1187	30.4748	0.4011	0.0409	0.1689	13.9735	3.7632	0.2624	99.6889	66.238
XAL 107	PLAG 20	50.1478	0.0831	30.5943	0.4058	0.0527	0.1109	13.9601	3.7572	0.2291	99.3409	66.3756
XAL 107	PLAG 21	49.0332	0.0979	31.2116	0.5196	-0.0206	0.1864	14.769	3.2885	0.212	99.2977	70.4209
XAL 107	PLAG 21	49.1744	0.1261	31.0987	0.4286	0.0041	0.1661	14.2664	3.4084	0.2185	98.8913	68.938
XAL 107	PLAG 21	50.4958	0.0732	30.8331	0.4506	-0.0273	0.1348	13.6396	3.7387	0.3272	99.6658	65.5913
XAL 107	PLAG 21	50.4905	0.0753	30.5697	0.4558	-0.0272	0.1286	13.8487	3.7874	0.2499	99.5786	65.946
XAL 107	PLAG 21	49.4063	0.0655	30.9213	0.4749	0.0041	0.1239	14.6397	3.1207	0.2121	98.9683	71.2764
XAL 107	PLAG 21	49.7122	0.0712	31.1516	0.4703	0.0313	0.1026	14.0581	3.373	0.2269	99.1972	68.804
XAL 107	PLAG 21	50.765	0.0992	30.6893	0.4504	-0.0331	0.1771	13.4414	3.6247	0.2127	99.4267	66.364
XAL 107	PLAG 21	50.5073	0.0765	30.4415	0.6024	0.0284	0.1515	13.4566	3.6446	0.2543	99.1631	66.1103
XAL 107	PLAG 22	49.6967	0.0996	30.4928	0.4778	0.0486	0.1615	14.2996	3.4538	0.2767	99.0072	68.4869
XAL 107	PLAG 22	49.6211	0.0951	31.1855	0.4797	-0.0273	0.1648	14.4143	3.2914	0.2392	99.4639	69.7844
XAL 107	PLAG 22	49.8393	0.0825	30.9065	0.4402	-0.0206	0.1473	13.8501	3.415	0.2312	98.8914	68.2094
XAL 107	PLAG 22	50.0052	0.096	30.5093	0.4408	0.0276	0.1664	14.0789	3.4206	0.2477	98.9925	68.4632
XAL 107	PLAG 22	50.1688	0.1117	30.5442	0.5794	0.0607	0.1419	13.634	3.6133	0.2457	99.0997	66.6199
XAL 107	PLAG 23	49.9273	0.096	30.736	0.6218	0.0125	0.1443	14.0802	3.4763	0.2019	99.2963	68.313
XAL 107	PLAG 23	49.5932	0.1483	30.8318	0.6198	-0.0133	0.1573	14.0897	3.505	0.1977	99.1295	68.1717
XAL 107	PLAG 23	49.4408	0.1242	30.9531	0.5371	0.0214	0.1415	14.0936	3.3445	0.2747	98.9308	68.8411
XAL 107	PLAG 23	50.4433	0.1128	30.7031	0.6166	0.0059	0.1435	13.9233	3.4781	0.2249	99.6514	67.9679
XAL 107	PLAG 23	50.3985	0.0786	30.413	0.5773	-0.0457	0.1441	13.6648	3.7252	0.2521	99.208	65.9938
XAL 107	PLAG 23	50.7626	0.0644	30.7023	0.6072	0.0302	0.1404	13.5463	3.5545	0.2481	99.656	66.8154
XAL 107	PLAG 23	51.0557	0.1222	30.4162	0.6541	0.0041	0.1276	13.2271	3.9013	0.2315	99.7396	64.3261
XAL 107	PLAG 23	50.7706	0.1092	30.1624	0.6244	0.0449	0.1402	13.3611	3.6891	0.3169	99.2188	65.4498
XAL 107	PLAG 23	51.0558	0.1691	29.8991	0.8096	0.0228	0.1601	13.0917	3.8414	0.3086	99.3582	64.1424
XAL 107	PLAG 24	50.4514	0.092	30.396	0.5449	0.0144	0.1499	13.5846	3.5134	0.2397	98.9863	67.1573
XAL 107	PLAG 24	50.4276	0.088	30.1528	0.4761	0.0457	0.1231	13.7895	3.5505	0.2604	98.9137	67.1851
XAL 107	PLAG 24	50.2188	0.0701	31.3043	0.5352	-0.0085	0.1188	14.382	3.4324	0.2581	100.311	68.8117
XAL 107	PLAG 24	49.6219	0.0817	30.8573	0.4581	-0.0343	0.1479	13.8565	3.4581	0.1979	98.6451	68.0903
XAL 107	PLAG 24	50.4963	0.0933	30.3103	0.4237	0.0055	0.1609	13.0521	3.8101	0.2232	98.5754	64.5734
XAL 107	PLAG 24	50.2189	0.0701	30.3863	0.4635	-0.0284	0.1451	13.1957	3.852	0.2086	98.5118	64.6379
XAL 107	PLAG 24	51.5794	0.0886	30.2051	0.3273	-0.0026	0.1458	13.3957	3.7174	0.2817	99.7383	65.478
XAL 107	PLAG 24	50.7651	0.1097	30.3068	0.4891	0.0114	0.1309	13.7541	3.8352	0.2647	99.667	65.4656
XAL 107	PLAG 24	50.0353	0.124	30.9281	0.5295	-0.0272	0.1652	13.6597	3.5071	0.1812	99.1029	67.549
XAL 107	PLAG 25	50.8623	0.1096	29.6836	0.6114	0.0217	0.1238	12.8566	4.0925	0.2817	98.6432	62.4172
XAL 107	PLAG 25	49.4921	0.0578	30.9921	0.478	-0.053	0.1417	14.5369	3.3817	0.1955	99.2226	69.5908
XAL 107	PLAG 25	49.8139	0.0613	30.5328	0.5891	0.0228	0.1477	14.3384	3.4223	0.1977	99.126	69.0444
XAL 107	PLAG 25	49.488	0.1037	30.8331	0.4618	-0.0574	0.1211	14.0591	3.4646	0.2539	98.7279	68.1465
XAL 107	PLAG 25	49.1416	0.094	30.8462	0.5623	0.0228	0.1298	14.342	3.3066	0.2517	98.697	69.5354
XAL 107	PLAG 25	49.8575	0.1092	30.5489	0.4947	0.0177	0.1942	13.7896	3.5576	0.1979	98.7672	67.3875
XAL 107	PLAG 25	49.9512	0.077	30.7825	0.4101	0.0026	0.1407	13.4123	3.5577	0.2252	98.5594	66.6662
XAL 107	PLAG 25	49.6185	0.0881	30.6991	0.5153	-0.0015	0.1885	14.5119	3.4677	0.183	99.2706	69.0873
XAL 107	PLAG 25	49.5791	0.1031	30.8527	0.5298	-0.0129	0.1602	14.4627	3.4307	0.2495	99.3548	68.9751
XAL 107	PLAG 25	49.3154	0.1004	30.9563	0.5597	-0.0199	0.191	14.4094	3.5499	0.2412	99.3035	68.2239
XAL 107	PLAG 26	49.4181	0.1317	30.9208	0.6334	0.0423	0.133	13.703	3.4413	0.2623	98.6858	67.6926
XAL 107	PLAG 26	49.9073	0.0935	31.3256	0.4806	-0.0409	0.1254	14.172	3.3874	0.1957	99.6464	69.0146
XAL 107	PLAG 26	49.0796	0.1102	31.1579	0.5077	-0.0052	0.1089	14.0807	3.3073	0.2144	98.5614	69.2917
XAL 107	PLAG 26	49.8551	0.0922	30.8488	0.5495	0.0784	0.1464	13.9667	3.341	0.2103	99.0885	68.9262
XAL 107	PLAG 26	49.5721	0.1228	31.3312	0.6159	0.0044	0.076	14.2767	3.5494	0.2912	99.8398	67.8339
XAL 107	PLAG 26	50.1836	0.1529	30.5559	0.5768	-0.0052	0.0215	13.3253	3.628	0.2731	98.7121	65.9153
XAL 107	PLAG 27	50.4555	0.1182	30.5689	0.671	-0.0438	0.1133	13.8594	3.7259	0.3247	99.7931	66.0326
XAL 107	PLAG 27	49.6603	0.1123	30.8259	0.5018	0.0843	0.1853	13.7494	3.4655	0.227	98.8119	67.7611
XAL 107	PLAG 27	49.5752	0.0852	30.8441	0.4528	0.007	0.1398	13.8994	3.4084	0.2229	98.6348	68.3601
XAL 107	PLAG 27	49.5448	0.0622	30.9244	0.4459	0.0309	0.1565	14.3285	3.3167	0.2289	99.0389	69.5456
XAL 107	PLAG 27	49.7388	0.0756	30.7423	0.4182	0.0066	0.1611	14.2977	3.2098	0.2435	98.8936	70.1004
XAL 107	PLAG 27	49.953	0.0709	30.7311	0.5614	-0.0339	0.1593	14.2626	3.4639	0.2248	99.3931	68.5749
XAL 107	PLAG 27	50.3711	0.121	30.8817	0.4404	-0.0074	0.132	13.8355	3.6659	0.2458	99.686	66.6386
XAL 107	PLAG 27	49.9132	0.0852	30.2756	0.436	0.0652	0.1302	14.1064	3.5555	0.1998	98.7671	67.8899
XAL 107	PLAG 27	50.2386	0.0809	30.475	0.3929	-0.0273	0.1453	14.4783	3.4666	0.231	99.4813	68.8567
XAL 107	PLAG 27	49.6478	0.1005	30.8564	0.5145	-0.0309	0.15	14.2946	3.3735	0.2122	99.1186	69.2173
XAL 107	PLAG 28	49.7677	0.0995	30.7864	0.4094	-0.0155	0.11	14.3528	3.3546	0.2143	99.0792	69.4094
XAL 107	PLAG 28	49.3478	0.0943	30.5654	0.5345	0.0169	0.1909	14.2297	3.4627	0.2475	98.6899	68.4431
XAL 107	PLAG 28	50.6018	0.1212	30.3944	0.4433	0.0029	0.1754	13.69	3.6544	0.2397	99.3232	66.4937
XAL 107	PLAG 28	49.8039	0.1045	30.4131	0.5374	-0.0449	0.1546	14.0794	3.4852	0.1894	98.7225	68.3072
XAL 107	PLAG 28	48.7542	0.0893	31.1923	0.5522	0.0184	0.117	14.3197	3.328	0.235	98.606	69.4388
XAL 107	PLAG 29	50.6218	0.0651	30.235	0.4612	0.0243	0.1406	13.2171	3.8221	0.2691	98.8563	64.6186
XAL 107	PLAG 29	50.2954	0.1031	30.555	0.4361	-0.0055	0.1246	13.9228	3.3743	0.2375	99.0433	68.5453
XAL 107	PLAG 29	49.792	0.1074	30.5713	0.3887	-0.0144	0.1431	14.0922	3.3709	0.2894	98.7405	68.6193
XAL 107	PLAG 29	50.5259	0.0869	31.0242	0.461	-0.0066	0.173	14.1074	3.4671	0.202	100.041	68.4086
XAL 107	PLAG 29	49.7677	0.122	31.3895	0.3488	-0.0247	0.142	14.3363	3.3242	0.2289	99.6346	69.5111
XAL 107	PLAG 29	49.3687	0.0668	31.0019	0.4163	-0.0055	0.17	14.1232	3.2171	0.1832	98.5417	70.0454
XAL 107	PLAG 29	49.896	0.0818	30.9512	0.4448	0.0435	0.1471	13.7964	3.4579	0.2333	99.052	67.8563
XAL 107	PLAG 29	49.3254	0.0759	31.3428	0.3932	-0.0173	0.127	13.9848	3.401	0.2061	98.8388	68.6048
XAL 107	PLAG 29	50.2166	0.1075	31.1933	0.4487	-0.0324	0.1485	14.1861	3.2877	0.2166	99.7725	69.561
XAL 107	PLAG 30	51.6016	0.132	29.7708	0.5524	0.0144	0.277	13.1421	3.8884	0.2755	99.6541	64.0869
XAL 107	PLAG 30	50.0865	0.1267	30.8467	0.4729	-0.0192	0.1318	14.3208	3.3167	0.2602	99.5431	69.4086
XAL 107	PLAG 30	49.7836	0.0678	31.2285	0.4086	-0.0044	0.1374	14.1218	3.4583	0.229	99.4307	68.377
XAL 107	PLAG 30	49.6563	0.0859	30.6424	0.4032	0.0217	0.1557	14.3392	3.3622	0.2268	98.8934	69.2929
XAL 107	PLAG 30	49.4015	0.1293	30.6831	0.4216	0.0622	0.129	14.0305	3.5533	0.2123	98.6229	67.7362
XAL 107	PLAG 30	49.5708	0.0905	31.1124	0.4852	-0.0044	0.1424	14.2539	3.4341	0.204	99.2889	68.8229
XAL 107	PLAG 30	49.1323	0.0609	30.9375	0.4357	-0.0501	0.1245	14.3795	3.3943	0.2205	98.6352	69.184
XAL 107	PLAG 30	50.0802	0.0784	30.9148	0.5453	-0.0203	0.1328	14.2222	3.2859	0.2082	99.4475	69.6613
XAL 107	PLAG 30	50.1478	0.0971	30.4696	0.4679	-0.0041	0.1528	13.4949	3.6351	0.2606	98.7218	66.205
XAL 107	PLAG 31	49.8295	0.1117	30.7425	0.6136	0.0239	0.1463	13.9844	3.4531	0.2457	99.1506	68.1313
XAL 107	PLAG 31	49.7184	0.1007	30.7548	0.5101	0.0081	0.0753	14.1509	3.5775	0.2185	99.1144	67.756
XAL 107	PLAG 31	49.637	0.089	30.8095	0.5201	0.0328	0.1753	13.8452	3.4812	0.2437	98.8336	67.7522
XAL 107	PLAG 31	49.9583	0.0748	30.8442	0.6657	-0.0445	0.1503	13.7829	3.5765	0.2269	99.2352	67.151
XAL 107	PLAG 31	49.8077	0.1013	30.8904	0.4475	0.0284	0.1584	13.7518	3.3502	0.2083	98.7439	68.5449
XAL 107	PLAG 31	50.3752	0.1088	30.1289	0.6396	-0.0103	0.135	13.6785	3.6054	0.2583	98.9193	66.6906
XAL 107	PLAG 31	50.3697	0.1515	30.0947	0.6234	-0.0099	0.1185	13.5522	3.9598	0.2439	99.1038	64.5086
XAL 107	PLAG 32	49.3597	0.0721	31.2198	0.4104	0.0166	0.1327	14.2399	3.2918	0.2206	98.9635	69.5999
XAL 107	PLAG 32	49.5444	0.0937	30.9786	0.488	-0.0361	0.1652	14.3111	3.3099	0.2081	99.0628	69.6449
XAL 107	PLAG 32	49.2362	0.035	31.188	0.3269	-0.0177	0.1443	14.2219	3.3375	0.1769	98.649	69.4695
XAL 107	PLAG 32	49.8479	0.122	30.8096	0.5424	0.0181	0.1587	13.794	3.3223	0.2792	98.8943	68.4953
XAL 107	PLAG 32	49.9975	0.1642	30.6813	0.6641	-0.0302	0.1787	13.4393	3.7847	0.3063	99.1859	65.072
XAL 107	PLAG 33	50.2735	0.0701	30.7596	0.5281	-0.0018	0.1307	13.8039	3.4069	0.2417	99.2126	68.1444
XAL 107	PLAG 33	49.9325	0.108	30.6595	0.443	0.0092	0.2967	13.8218	3.6791	0.2521	99.2018	66.5159
XAL 107	PLAG 33	49.8483	0.0404	30.7375	0.6192	-0.0041	0.1402	14.1841	3.5073	0.2372	99.3102	68.1482
XAL 107	PLAG 33	49.5248	0.0842	30.8584	0.5744	-0.0177	0.1873	14.2697	3.3172	0.1977	98.9961	69.5812
XAL 107	PLAG 34	50.7748	0.1088	30.513	0.4877	0.0228	0.1358	14.227	3.4837	0.2041	99.9577	68.4845
XAL 107	PLAG 34	51.4426	0.1114	30.03	0.4562	0.0111	0.1205	13.0741	4.0747	0.2463	99.5668	63.0346
XAL 107	PLAG 34	50.2816	0.0847	30.9869	0.4311	-0.0015	0.1221	13.8399	3.3866	0.2084	99.3399	68.4573
XAL 107	PLAG 34	50.5499	0.0868	30.4291	0.5443	-0.0088	0.1403	13.3228	3.6629	0.2544	98.9817	65.778
XAL 107	PLAG 34	50.0731	0.0797	30.8369	0.5008	0.0376	0.1381	13.931	3.3341	0.225	99.1562	68.8547
XAL 107	PLAG 34	50.7354	0.1063	30.0374	0.5051	-0.0203	0.1582	13.7172	3.664	0.1876	99.0909	66.6816
XAL 107	PLAG 34	49.495	0.1005	30.7817	0.47	0.0022	0.1315	14.0519	3.2912	0.177	98.501	69.5001
XAL 107	PLAG 35	50.5628	0.1176	30.4421	0.4681	-0.0074	0.1196	13.4381	3.7018	0.2169	99.0596	65.889
XAL 107	PLAG 35	50.2507	0.1004	30.5309	0.4157	0.0265	0.1486	13.9989	3.4997	0.2749	99.2464	67.7608
XAL 107	PLAG 35	49.6388	0.1239	30.8138	0.4626	-0.0133	0.1532	14.1809	3.4161	0.2705	99.0466	68.556
XAL 107	PLAG 35	49.9524	0.0877	30.7138	0.4234	0.0486	0.1259	13.8609	3.4968	0.2208	98.9302	67.7739
XAL 107	PLAG 35	50.5074	0.085	30.2107	0.4254	-0.0147	0.1642	13.4563	3.6055	0.1731	98.613	66.658
XAL 107	PLAG 35	50.1893	0.084	30.4809	0.4724	-0.0103	0.15	13.889	3.5303	0.1979	98.9836	67.7071
XAL 107	PLAG 35	49.6977	0.0698	31.3043	0.5053	-0.0431	0.1109	14.4605	3.2565	0.1602	99.5221	70.3873
XAL 107	PLAG 35	50.1958	0.1617	30.7044	0.5043	0.0007	0.1544	13.9694	3.5155	0.2436	99.4499	67.7422
XAL 107	PLAG 36	50.1441	0.1129	30.5383	0.6587	0.0029	0.1805	13.7888	3.5935	0.2749	99.2947	66.8741
XAL 107	PLAG 36	49.4665	0.1018	30.8062	0.7455	0.0136	0.1676	14.1559	3.3958	0.2934	99.1462	68.5505
XAL 107	PLAG 36	49.3604	0.1145	31.041	0.5572	-0.056	0.1904	14.5481	3.341	0.1788	99.2756	69.9184
XAL 107	PLAG 36	49.5994	0.0898	30.6461	0.5178	-0.0011	0.1511	14.09	3.2743	0.1998	98.5673	69.5691
XAL 107	PLAG 36	49.744	0.0853	30.8098	0.4554	-0.0295	0.1636	14.1716	3.4215	0.1894	99.0112	68.8316
XAL 107	PLAG 36	49.6764	0.0894	30.5642	0.426	0.0659	0.139	14.0507	3.292	0.2228	98.5263	69.3066
XAL 107	PLAG 36	50.2289	0.0669	30.5381	0.4288	0.0361	0.1256	13.7391	3.6211	0.2105	98.9949	66.8813
XAL 107	PLAG 36	49.7359	0.2027	30.7721	0.4506	-0.0048	0.085	13.4379	3.4909	0.3335	98.5039	66.6814
XAL 107	PLAG 36	50.5897	0.1159	30.323	0.463	0.0103	0.1364	13.5307	3.6581	0.2335	99.0607	66.2341
XAL 107	PLAG 36	49.5086	0.0722	30.8182	0.4133	0.0379	0.2015	14.0818	3.4832	0.1957	98.8125	68.2979
XAL 107	PLAG 37	49.3893	0.1247	30.6441	0.4412	0.0321	0.1587	14.0858	3.3746	0.2811	98.5316	68.6208
XAL 107	PLAG 37	50.0791	0.1112	30.2115	0.5473	-0.0184	0.1312	13.8101	3.5979	0.2771	98.747	66.8744
XAL 107	PLAG 37	49.9815	0.0703	30.9201	0.4584	-0.0107	0.1196	13.9589	3.3929	0.2604	99.1512	68.3967
XAL 107	PLAG 37	49.1988	0.1062	30.7864	0.5122	-0.0055	0.1609	14.1873	3.429	0.2081	98.5834	68.7356
XAL 107	PLAG 37	50.0158	0.1077	30.4567	0.4884	0.0169	0.1552	13.9688	3.4845	0.2416	98.9355	67.935
XAL 107	PLAG 38	50.4247	0.0958	30.5743	0.6685	-0.0033	0.1441	13.4412	3.6376	0.248	99.2308	66.1506
XAL 107	PLAG 38	49.5166	0.0544	31.0652	0.4533	0.0037	0.13	13.9578	3.492	0.1833	98.8563	68.1021
XAL 107	PLAG 38	49.874	0.0773	31.1554	0.4755	0.0088	0.1041	14.4736	3.2583	0.2164	99.6434	70.1671
XAL 107	PLAG 38	49.6409	0.0989	30.9197	0.4166	-0.0505	0.1393	14.4662	3.2522	0.2226	99.1059	70.1684
XAL 107	PLAG 38	50.124	0.0888	30.8038	0.4386	-0.0173	0.1196	14.0572	3.3394	0.1687	99.1227	69.2431
XAL 107	PLAG 38	50.4031	0.0996	30.3466	0.4585	0.0181	0.0932	13.8088	3.5996	0.2604	99.0879	66.9265
XAL 107	PLAG 38	49.9104	0.0685	30.9297	0.5126	0.0221	0.1027	14.3001	3.371	0.2643	99.4814	69.0325
XAL 107	PLAG 38	52.386	0.1579	29.2597	0.5132	-0.042	0.134	12.8252	4.1637	0.3404	99.738	61.7629
XAL 107	PLAG 39	50.5686	0.117	30.63	0.5428	0.0066	0.1336	13.9715	3.6016	0.2124	99.7841	67.3589
XAL 107	PLAG 39	49.5494	0.0767	30.8151	0.4208	0.0184	0.1376	14.1872	3.442	0.2643	98.9116	68.4362
XAL 107	PLAG 39	49.8919	0.0744	30.7286	0.3837	-0.0442	0.1578	14.1487	3.5768	0.229	99.1467	67.716
XAL 107	PLAG 39	50.0737	0.0463	30.9341	0.399	0.0177	0.1797	14.0293	3.4674	0.2103	99.3576	68.2551
XAL 107	PLAG 39	49.4886	0.0703	31.0625	0.4093	0.0424	0.1235	14.2418	3.4024	0.1728	99.0136	69.1189
XAL 107	PLAG 39	50.4823	0.0451	30.9044	0.416	0.0026	0.1308	14.2084	3.3838	0.1937	99.7671	69.0992
XAL 107	PLAG 39	50.3656	0.0903	30.0869	0.5072	-0.0656	0.1095	13.6352	3.7879	0.298	98.8149	65.4136
XAL 107	PLAG 40	50.0571	0.135	30.6429	0.4778	-0.0015	0.1659	14.162	3.5404	0.1873	99.3669	68.1135
XAL 107	PLAG 40	50.207	0.0953	30.4708	0.515	0.0343	0.1331	13.8463	3.4226	0.1979	98.9222	68.2911
XAL 107	PLAG 40	49.9093	0.1097	30.9587	0.4154	0.0155	0.1263	14.1558	3.4444	0.1749	99.31	68.7277
XAL 107	PLAG 40	49.4973	0.0803	30.571	0.5366	-0.0508	0.1471	14.0239	3.4749	0.2331	98.5133	68.1112
XAL 107	PLAG 40	50.5877	0.1063	30.1673	0.4434	-0.007	0.1381	13.0985	3.7961	0.2608	98.5912	64.5935
XAL 107	PLAG 40	50.2566	0.1151	30.2015	0.5616	0.011	0.1639	13.8318	3.8134	0.2583	99.2133	65.74
XAL 107	PLAG 40	49.9725	0.1347	30.2473	0.4779	-0.0063	0.1492	13.9569	3.6939	0.2415	98.8677	66.6859
XAL 107	PLAG 40	50.2926	0.0705	30.4204	0.5643	0.0195	0.1683	13.354	3.7116	0.271	98.8721	65.482
XAL 107	PLAG 40	50.1552	0.1137	30.3118	0.473	0.0092	0.1315	13.426	3.7283	0.2753	98.624	65.4907
XAL 107	PLAG 40	50.3922	0.1122	30.3052	0.4527	-0.0184	0.117	13.6195	3.5926	0.2584	98.8314	66.6688
XAL 107	PLAG 40	50.5107	0.0772	29.835	0.5	0.0449	0.1603	13.5719	3.7869	0.2959	98.7828	65.3213
XAL 107	PLAG 40	50.328	0.108	30.1974	0.5919	-0.0361	0.1009	13.3933	3.6756	0.2147	98.5739	65.9758
XAL 107	PLAG 40	50.2291	0.1246	30.2438	0.5543	0.0007	0.1554	13.517	3.5733	0.2167	98.6149	66.7791
XAL 107	PLAG 40	49.5237	0.1446	30.6175	0.5344	0.0203	0.1411	13.6693	3.5686	0.2833	98.5026	66.7951
XAL 107	PLAG 40	49.4194	0.0989	30.6007	0.5428	-0.0033	0.134	14.0506	3.6095	0.2331	98.6856	67.3573
XAL 107	PLAG 40	50.0183	0.077	30.3108	0.5661	-0.0063	0.1246	14.1056	3.3558	0.2519	98.8038	68.8809
XAL108	PLAG 1	49.4099	0.0994	30.6735	0.4537	0.0193	0.1588	14.4554	3.3183	0.1952	98.7835	69.8575
XAL108	PLAG 1	50.2904	0.0964	30.4373	0.4591	-0.0193	0.1104	14.0108	3.4273	0.2651	99.0774	68.2498
XAL108	PLAG 1	50.3135	0.1027	30.6778	0.4418	-0.0138	0.1716	13.9674	3.3554	0.1739	99.1902	68.9878
XAL108	PLAG 1	50.0564	0.0966	30.3333	0.4881	0.0033	0.1614	14.154	3.6033	0.2629	99.1593	67.4394
XAL108	PLAG 1	50.1498	0.0787	30.524	0.388	0	0.1599	13.7656	3.6628	0.2457	98.9745	66.544
XAL108	PLAG 1	50.3292	0.0748	30.4552	0.4005	0.0281	0.1194	13.8394	3.5384	0.1761	98.961	67.6666
XAL108	PLAG 1	49.871	0.095	30.7772	0.4345	0.0357	0.1421	14.197	3.3232	0.1803	99.056	69.5066
XAL108	PLAG 1	49.7973	0.0968	30.8548	0.4589	-0.0652	0.1214	14.139	3.4748	0.1694	99.0474	68.5398
XAL108	PLAG 1	50.3345	0.1114	30.4823	0.5155	-0.0215	0.1254	14.4023	3.3855	0.2562	99.5917	69.1299
XAL108	PLAG 2	50.0066	0.1365	30.404	0.6833	0.0284	0.1312	13.677	3.6289	0.2674	98.9633	66.5148
XAL108	PLAG 2	50.6914	0.1094	30.3036	0.5027	-0.0251	0.1086	14.0383	3.5022	0.2456	99.4765	67.922
XAL108	PLAG 2	50.3265	0.1059	30.6356	0.4472	0	0.1278	14.1826	3.3731	0.1825	99.3811	69.1703
XAL108	PLAG 2	50.6381	0.1092	30.5038	0.4674	0.0251	0.1694	14.1361	3.4171	0.2608	99.727	68.5209
XAL108	PLAG 2	49.6044	0.1126	30.664	0.5444	-0.043	0.1665	14.247	3.2811	0.1781	98.7551	69.8501
XAL108	PLAG 2	49.6071	0.0749	30.6662	0.4882	0.0419	0.132	13.9455	3.3887	0.1869	98.5314	68.696
XAL108	PLAG 2	50.1079	0.077	30.5487	0.4639	0.0437	0.1208	13.9966	3.413	0.2369	99.0085	68.4262
XAL108	PLAG 3	50.25	0.0827	30.6561	0.5741	0.0025	0.1147	14.0328	3.3281	0.2195	99.2605	69.0709
XAL108	PLAG 3	49.7573	0.1005	31.3584	0.4473	-0.0036	0.145	14.5034	3.245	0.2171	99.7704	70.2884
XAL108	PLAG 3	49.8042	0.1087	30.8248	0.5711	-0.0025	0.149	14.1739	3.239	0.2303	99.0983	69.7898
XAL108	PLAG 3	50.2864	0.1005	30.7169	0.4492	-0.0379	0.1605	13.6991	3.4141	0.2892	99.0781	67.744
XAL108	PLAG 3	48.9578	0.0795	31.1726	0.4686	0.0248	0.1518	14.8818	2.9374	0.2082	98.8825	72.7887
XAL108	PLAG 3	50.0101	0.0629	30.8745	0.3563	0.0313	0.1462	14.4295	3.2229	0.1846	99.3183	70.4513
XAL108	PLAG 3	49.8256	0.079	30.7203	0.571	-0.0044	0.1437	14.2053	3.4059	0.1803	99.1266	69.0129
XAL108	PLAG 3	50.3945	0.1215	30.6623	0.5098	-0.0011	0.1696	13.9503	3.4677	0.1978	99.4723	68.1802
XAL108	PLAG 4	49.8425	0.1255	30.4033	0.523	0.0284	0.1055	14.0897	3.2721	0.2281	98.6181	69.4678
XAL108	PLAG 4	49.9309	0.0936	30.1908	0.457	0.0127	0.1543	13.9307	3.4695	0.2651	98.5045	67.8723
XAL108	PLAG 4	50.2075	0.0844	30.4068	0.6037	0.0233	0.1449	13.8517	3.4468	0.2739	99.0429	67.8489
XAL108	PLAG 4	50.3746	0.114	30.5512	0.4617	-0.0051	0.1403	14.5753	3.2497	0.1867	99.6483	70.4862
XAL108	PLAG 4	49.9209	0.0925	30.6422	0.4394	0.0018	0.1268	14.1355	3.3391	0.2043	98.9025	69.2195
XAL108	PLAG 4	50.4611	0.061	30.5919	0.479	0.0299	0.1498	14.4187	3.3615	0.2085	99.7614	69.4871
XAL108	PLAG 4	50.484	0.0557	30.8911	0.5098	-0.0273	0.1416	14.322	3.3819	0.1847	99.9434	69.3168
XAL108	PLAG 4	49.8222	0.1178	30.5646	0.3517	-0.0321	0.139	14.3598	3.3497	0.2063	98.879	69.4806
XAL108	PLAG 4	49.8581	0.0921	30.4404	0.3634	0.0554	0.1495	14.2131	3.3686	0.2151	98.7556	69.1118
XAL108	PLAG 4	49.9234	0.0847	30.3991	0.4986	0.0018	0.1281	13.8579	3.4782	0.1304	98.5023	68.2408
XAL108	PLAG 4	49.6505	0.0995	30.5259	0.3827	0.016	0.1436	14.4183	3.2384	0.1607	98.6355	70.4369
XAL108	PLAG 4	50.2113	0.0831	30.6129	0.5569	-0.0463	0.1388	13.6763	3.2576	0.2023	98.6928	69.0294
XAL108	PLAG 5	51.0604	0.1161	29.805	0.4632	-0.0602	0.1746	13.6871	3.629	0.1917	99.0668	66.8234
XAL108	PLAG 5	50.9624	0.1084	29.8337	0.4036	0.0212	0.1317	13.3751	3.7791	0.2441	98.8593	65.2298
XAL108	PLAG 5	50.4202	0.1211	30.0367	0.4088	0.0106	0.1639	13.4671	3.6516	0.3268	98.6068	65.8074
XAL108	PLAG 5	50.4477	0.1234	30.3172	0.4353	0.0204	0.1354	13.7189	3.506	0.2222	98.9266	67.4871
XAL108	PLAG 5	51.2786	0.1226	30.473	0.4961	0.004	0.1457	13.5588	3.7173	0.2702	100.066	65.7958
XAL108	PLAG 5	50.4537	0.1124	30.6215	0.4375	0.0109	0.1316	13.8719	3.4497	0.2439	99.3332	67.9828
XAL108	PLAG 5	50.0944	0.0928	30.4781	0.4083	0.0004	0.1233	14.1413	3.3394	0.1806	98.8587	69.3218
XAL108	PLAG 6	49.6017	0.1289	30.5409	0.379	0.0168	0.1378	14.1971	3.2888	0.2305	98.5215	69.515
XAL108	PLAG 6	49.9748	0.0949	30.2802	0.4056	0.0566	0.2071	13.9919	3.3475	0.1937	98.5522	68.9923
XAL108	PLAG 6	50.1275	0.0548	30.1814	0.364	-0.0022	0.1604	14.0103	3.3953	0.2134	98.5048	68.6496
XAL108	PLAG 6	49.2433	0.0693	30.7485	0.4698	0.0303	0.1623	14.7006	3.2735	0.2043	98.9019	70.4459
XAL108	PLAG 6	49.449	0.0541	30.9747	0.506	-0.019	0.0953	14.2722	3.1131	0.224	98.6695	70.7502
XAL108	PLAG 6	50.5821	0.0926	30.6724	0.4132	-0.0099	0.1139	13.9381	3.4379	0.2548	99.4951	68.1138
XAL108	PLAG 6	50.3431	0.0967	30.9428	0.389	-0.0091	0.158	14.0792	3.286	0.1894	99.4751	69.5232
XAL108	PLAG 6	50.0265	0.0608	30.7242	0.3982	-0.042	0.1363	14.3921	3.4126	0.2066	99.3155	69.1472
XAL108	PLAG 6	50.411	0.0531	30.8664	0.4216	0.0109	0.1833	13.9861	3.3971	0.233	99.5626	68.5224
XAL108	PLAG 6	49.7861	0.102	30.6655	0.4332	0.0358	0.1713	14.4577	3.246	0.2175	99.115	70.2139
XAL108	PLAG 6	50.4616	0.1204	30.4414	0.4404	0.0482	0.1816	14.1696	3.6019	0.2372	99.7022	67.57
XAL108	PLAG 6	50.5385	0.1365	30.4397	0.3571	0.0157	0.1673	13.9242	3.5092	0.196	99.2842	67.8969
XAL108	PLAG 6	51.1444	0.082	30.4428	0.506	-0.046	0.1096	13.6247	3.7141	0.2157	99.7932	66.1312
XAL108	PLAG 7	49.675	0.0642	30.42	0.409	-0.004	0.1558	14.4327	3.2115	0.2108	98.5751	70.4194
XAL108	PLAG 7	49.9186	0.0983	30.6634	0.4767	0.0599	0.124	14.1475	3.444	0.1916	99.1239	68.6509
XAL108	PLAG 7	50.4022	0.115	30.4813	0.4259	0.0296	0.143	13.688	3.3602	0.2436	98.8887	68.2393
XAL108	PLAG 7	49.9696	0.0942	30.4132	0.5303	-0.0166	0.1319	14.0805	3.3954	0.2282	98.8266	68.6969
XAL108	PLAG 7	50.4979	0.1197	29.7258	0.5537	-0.0115	0.1139	13.6742	3.7222	0.2585	98.6544	66.002
XAL108	PLAG 7	51.7282	0.1017	29.7981	0.6178	-0.0029	0.1572	13.2248	3.9833	0.315	99.9233	63.556
XAL108	PLAG 8	49.9364	0.1069	30.4689	0.4624	0.0487	0.1609	13.922	3.3688	0.2068	98.6819	68.7017
XAL108	PLAG 8	50.4637	0.1006	30.2632	0.4552	-0.0119	0.144	13.9447	3.4291	0.209	98.9976	68.3595
XAL108	PLAG 8	50.7896	0.1094	30.3566	0.4719	-0.0022	0.158	13.5115	3.6547	0.2458	99.2952	66.1749
XAL108	PLAG 8	50.1597	0.0931	30.4268	0.4699	-0.0271	0.1406	13.6741	3.5234	0.2393	98.6999	67.2438
XAL108	PLAG 8	50.9351	0.1127	29.7522	0.4261	-0.0079	0.1753	13.2038	3.8648	0.2503	98.7124	64.4231
XAL108	PLAG 8	50.7172	0.1071	30.211	0.409	0.0181	0.1604	13.664	3.5423	0.2393	99.0685	67.1146
XAL108	PLAG 8	50.3224	0.1182	30.175	0.4648	-0.0238	0.1461	13.4963	3.6128	0.2501	98.5619	66.3792
XAL108	PLAG 8	50.2374	0.0914	30.4175	0.5614	0.0318	0.1637	13.747	3.4674	0.2327	98.9503	67.723
XAL108	PLAG 8	50.3173	0.0719	30.1622	0.5838	-0.0029	0.1432	13.4997	3.5639	0.2242	98.5632	66.7774
XAL108	PLAG 8	50.1457	0.0609	30.9798	0.4897	0.0137	0.1249	13.9128	3.2624	0.2392	99.2291	69.213
XAL108	PLAG 8	50.7324	0.073	30.1121	0.4965	0.0227	0.2066	13.7387	3.5849	0.2349	99.2018	66.9993
XAL108	PLAG 8	50.1989	0.1224	30.1756	0.4254	-0.0292	0.0919	13.9688	3.4296	0.1982	98.5814	68.4374
XAL108	PLAG 8	50.4194	0.1245	30.5161	0.4592	0.0487	0.155	13.5689	3.5499	0.2414	99.0831	66.9064
XAL108	PLAG 8	50.2004	0.119	30.4631	0.5129	-0.0242	0.1112	14.0568	3.4547	0.2519	99.146	68.2084
XAL108	PLAG 8	51.6289	0.1303	29.5834	0.656	-0.0065	0.1591	12.9089	3.9095	0.326	99.2956	63.3656
XAL108	PLAG 9	47.3448	-0.0031	32.785	0.2686	-0.0007	0.1615	16.1628	2.2133	0.09	99.0221	79.7174
XAL108	PLAG 9	48.446	0.0256	31.8726	0.2909	0.0426	0.1887	15.4919	2.5989	0.1202	99.0774	76.1717
XAL108	PLAG 9	48.8533	0.0226	31.563	0.3722	0.0181	0.1668	15.241	2.7856	0.1826	99.2051	74.3493
XAL108	PLAG 9	50.3869	0.0653	30.8583	0.2712	0.0264	0.1522	14.0873	3.3736	0.1961	99.4171	68.9682
XAL108	PLAG 9	50.2616	0.0218	30.7788	0.2879	0.0209	0.1475	14.4194	3.448	0.2067	99.5927	68.9757
XAL108	PLAG 9	48.385	0.1035	32.1245	0.3026	0.0159	0.1631	15.3189	2.6025	0.1117	99.1277	75.9815
XAL108	PLAG 9	49.7081	0.0375	30.7833	0.3042	-0.0108	0.1654	14.66	3.1885	0.1678	99.004	71.0625
XAL108	PLAG 9	49.3698	0.0479	31.2249	0.3005	-0.03	0.1871	14.6124	3.2522	0.1743	99.1391	70.5739
XAL108	PLAG 9	49.3176	0.0779	31.2416	0.2706	0.0274	0.1591	14.7809	2.8892	0.1548	98.9192	73.1956
XAL108	PLAG 9	48.7309	0.0343	31.4139	0.2737	-0.0094	0.1019	15.2693	2.8469	0.1396	98.8013	74.168
XAL108	PLAG 9	48.8488	0.04	31.0818	0.3026	-0.0051	0.1726	15.2598	2.7987	0.1912	98.6904	74.2489
XAL108	PLAG 9	48.982	0.0475	31.7245	0.2467	-0.0314	0.152	14.9072	2.8724	0.1376	99.0385	73.5465
XAL108	PLAG 9	48.9176	0.0582	31.2736	0.2349	0.0061	0.1758	15.0032	2.8117	0.1612	98.6423	73.9681
XAL108	PLAG 9	46.692	0.0096	32.6745	0.2614	0.0134	0.1433	16.751	1.962	0.1028	98.6099	82.0167
XAL108	PLAG 10	50.9343	0.0705	30.6167	0.4483	0.026	0.16	13.7828	3.5738	0.2587	99.8712	67.043
XAL108	PLAG 10	50.7208	0.1063	29.7287	0.486	0.0318	0.1327	13.6554	3.6779	0.2436	98.7831	66.2847
XAL108	PLAG 10	50.7393	0.1035	30.2615	0.4446	-0.0311	0.1658	13.5786	3.6376	0.2372	99.1369	66.42
XAL108	PLAG 10	50.5856	0.1137	30.0332	0.4745	-0.0354	0.1741	14.0336	3.5202	0.2628	99.1625	67.7407
XAL108	PLAG 10	50.9018	0.1059	30.3414	0.4501	-0.0199	0.1311	13.5475	3.5862	0.1704	99.2145	66.9335
XAL108	PLAG 10	49.7112	0.0802	30.7468	0.4982	0.0101	0.1047	14.2767	3.3398	0.198	98.9657	69.4521
XAL108	PLAG 10	51.1568	0.152	29.7328	0.3559	-0.0087	0.1601	13.0551	3.7823	0.2526	98.6389	64.628
XAL108	PLAG 11	50.6905	0.1551	30.6426	0.3731	-0.0343	0.152	14.1552	3.5472	0.252	99.9334	67.8108
XAL108	PLAG 11	50.4852	0.0969	30.421	0.3814	0.0029	0.1531	13.8594	3.5636	0.25	99.2134	67.2601
XAL108	PLAG 11	50.6996	0.0802	29.7521	0.4093	0.0383	0.1275	13.5665	3.7906	0.248	98.7122	65.4717
XAL108	PLAG 11	50.1563	0.0777	30.2483	0.4816	0.0228	0.136	13.7896	3.3946	0.2931	98.5999	67.9908
XAL108	PLAG 11	50.2292	0.0908	30.3014	0.4943	-0.026	0.1119	13.8549	3.6205	0.237	98.9141	66.9681
XAL108	PLAG 11	50.4765	0.1348	29.8503	0.5084	0.0162	0.1561	13.6915	3.8085	0.2737	98.916	65.4806
XAL108	PLAG 12	49.7813	0.0908	30.2931	0.4873	0.0072	0.128	14.2421	3.3056	0.209	98.5445	69.5648
XAL108	PLAG 12	50.2408	0.1099	30.3912	0.4663	-0.0098	0.1622	13.7622	3.5467	0.2179	98.8874	67.3302
XAL108	PLAG 13	49.8165	0.1225	30.9154	0.4772	0.0249	0.1408	14.2187	3.2399	0.2752	99.2311	69.6672
XAL108	PLAG 13	49.5949	0.089	31.3768	0.4333	-0.0296	0.14	14.6481	2.9933	0.2089	99.4547	72.1096
XAL108	PLAG 13	49.5613	0.1021	30.9241	0.4048	0.0336	0.1371	14.32	3.2542	0.1749	98.9122	70.1366
XAL108	PLAG 13	52.0368	0.1055	29.8003	0.5089	-0.0217	0.1267	12.7122	4.0541	0.2698	99.5927	62.4068
XAL108	PLAG 13	50.4129	0.0542	30.1498	0.3744	0.0083	0.1361	13.8597	3.4298	0.2478	98.6731	68.0683
XAL108	PLAG 13	49.7578	0.0985	30.8029	0.4066	-0.0394	0.1603	14.0907	3.3285	0.1814	98.7874	69.3097
XAL108	PLAG 13	51.1449	0.0906	30.2536	0.5476	0.0249	0.1578	13.542	3.6711	0.2821	99.7144	65.9901
XAL108	PLAG 14	50.2942	0.1218	30.4351	0.4261	-0.017	0.1492	14.029	3.3897	0.2561	99.0842	68.541
XAL108	PLAG 14	50.6548	0.0616	30.1466	0.4981	0.0014	0.1406	13.6579	3.6149	0.188	98.9639	66.874
XAL108	PLAG 14	50.5065	0.0841	30.0244	0.4793	-0.0267	0.1514	13.639	3.5897	0.2393	98.687	66.7932
XAL108	PLAG 14	51.2588	0.093	30.2424	0.4356	0.0148	0.141	13.4987	3.6326	0.2907	99.6076	66.11
XAL108	PLAG 14	50.385	0.0765	30.107	0.5038	-0.0217	0.1279	13.8833	3.6187	0.2712	98.9516	66.892
XAL108	PLAG 14	50.1703	0.1154	30.7112	0.4288	0.0354	0.1663	14.1681	3.1816	0.239	99.2161	70.1039
XAL108	PLAG 14	49.5702	0.1068	30.4559	0.4909	0.0303	0.1749	14.4414	3.3049	0.2132	98.7886	69.846
XAL108	PLAG 15	51.2742	0.0999	30.9238	0.4399	0.0166	0.1192	13.6979	3.3422	0.2243	100.138	68.4446
XAL108	PLAG 15	50.6227	0.0925	30.8698	0.4236	-0.0007	0.1369	13.7304	3.4709	0.1687	99.5148	67.9308
XAL108	PLAG 15	51.4605	0.0877	29.8411	0.4794	-0.0267	0.1664	13.5603	3.5551	0.2435	99.3672	66.8537
XAL108	PLAG 15	50.805	0.0896	30.6151	0.5131	0.0271	0.1278	13.777	3.7236	0.2562	99.9344	66.171
XAL108	PLAG 15	51.3192	0.1005	30.5303	0.4329	-0.0173	0.1639	13.1688	3.6809	0.201	99.5803	65.617
XAL108	PLAG 15	50.3525	0.0653	30.7839	0.4987	-0.0134	0.1258	13.9845	3.3628	0.1643	99.3245	69.0058
XAL108	PLAG 15	49.8844	0.106	30.421	0.4304	-0.0134	0.1059	13.9084	3.4564	0.2454	98.5444	67.9948
XAL108	PLAG 15	50.3198	0.091	30.9215	0.4458	0.0263	0.1625	14.127	3.3713	0.2688	99.7339	68.7515
XAL108	PLAG 16	47.5943	0.0174	32.6326	0.2657	0.0014	0.0785	16.1041	2.3018	0.1338	99.1297	78.8305
XAL108	PLAG 16	48.5142	0.0774	31.8574	0.2395	0.0116	0.1463	15.2484	2.7133	0.1809	98.989	74.8434
XAL108	PLAG 16	48.4563	0.0048	31.8085	0.3028	-0.0144	0.1324	15.2399	2.5914	0.1681	98.6897	75.7085
XAL108	PLAG 16	47.7903	0.0305	32.7491	0.252	0.0357	0.1532	15.8298	2.2397	0.1849	99.2652	78.7436
XAL108	PLAG 16	47.3727	0.0403	33.0646	0.2845	-0.0534	0.1386	15.9957	2.1141	0.0956	99.0528	80.2384
XAL108	PLAG 17	49.6193	0.0593	31.4555	0.4017	0.0137	0.1372	14.5332	2.9811	0.1877	99.3888	72.1211
XAL108	PLAG 17	48.1788	0.0177	32.15	0.2535	-0.017	0.1799	15.8412	2.6139	0.1575	99.3754	76.3111
XAL108	PLAG 17	48.4595	0.0167	31.9063	0.2418	-0.0307	0.1659	15.32	2.7625	0.1683	99.0101	74.6607
XAL108	PLAG 17	48.801	0.0136	31.4874	0.2705	-0.0184	0.1785	15.0731	2.817	0.1386	98.7612	74.121
XAL108	PLAG 17	48.8636	0.0124	32.2364	0.2444	0.0094	0.1689	15.1985	2.5055	0.1791	99.4181	76.1993
XAL108	PLAG 17	49.2306	0.0098	31.5504	0.2349	0.0137	0.1179	15.0845	2.7721	0.194	99.208	74.191
XAL108	PLAG 17	48.2594	0.0353	32.3895	0.266	0.0239	0.0807	15.6836	2.6129	0.1086	99.4598	76.3526
XAL108	PLAG 17	47.8606	0.0378	32.3892	0.293	-0.0246	0.1168	15.9387	2.337	0.1574	99.1059	78.3037
XAL108	PLAG 18	49.1379	0.0887	31.0836	0.4257	0.0477	0.1239	14.837	2.8938	0.1684	98.8069	73.1809
XAL108	PLAG 18	47.1909	0.0331	32.7384	0.2837	-0.0257	0.1339	16.5692	2.0821	0.1232	99.1288	80.8893
XAL108	PLAG 18	47.5347	0.03	32.4841	0.1864	0.0065	0.1209	16.4627	2.1211	0.1084	99.0548	80.5799
XAL108	PLAG 18	47.2199	0.0226	32.702	0.2076	0.0398	0.1289	16.2137	2.0716	0.1318	98.7378	80.5869
XAL108	PLAG 18	47.1028	0.06	32.887	0.2824	-0.0065	0.138	16.386	2.0865	0.0914	99.0274	80.8356
XAL108	PLAG 18	47.0149	0.0415	32.5784	0.324	0.034	0.1294	16.173	2.2225	0.1105	98.6281	79.566
XAL108	PLAG 18	47.9713	0.0501	32.3798	0.3609	-0.0249	0.1486	16.1158	2.2848	0.151	99.4373	78.8829
XAL108	PLAG 18	47.5034	0.0319	32.7983	0.2606	-0.0423	0.1297	16.1273	2.1351	0.1021	99.046	80.1851
XAL108	PLAG 18	47.3634	0.0094	32.6224	0.2517	-0.0141	0.1532	16.2462	2.2134	0.151	98.9966	79.5159
XAL108	PLAG 19	48.7459	0.0453	32.0638	0.2849	-0.0354	0.1332	14.6063	2.7461	0.1853	98.7757	73.783
XAL108	PLAG 19	48.838	0.0547	31.7903	0.2103	0.0318	0.1518	14.7469	2.7411	0.1874	98.7521	73.9923
XAL108	PLAG 19	49.0539	0.0292	32.2762	0.297	0.0097	0.1651	15.3113	2.6156	0.1872	99.9451	75.5459
XAL108	PLAG 19	48.6099	0.0259	32.2515	0.3166	-0.0234	0.1583	15.127	2.7327	0.1745	99.3729	74.59
XAL108	PLAG 19	48.1151	0.0226	31.7908	0.205	0.0346	0.1648	15.4217	2.651	0.1764	98.582	75.4881
XAL108	PLAG 19	47.921	0.0124	32.1969	0.2111	0.0202	0.1701	15.6059	2.445	0.1976	98.7802	77.0067
XAL108	PLAG 19	47.6375	-0.0039	32.22	0.2317	0.0105	0.1397	16.0234	2.2621	0.1189	98.6398	79.0948
XAL108	PLAG 20	47.3054	0.0543	32.8727	0.3118	-0.0184	0.1428	16.1668	2.1012	0.1252	99.0618	80.3588
XAL108	PLAG 20	48.6707	0.0018	31.7684	0.2732	-0.0188	0.1101	15.4686	2.7424	0.1914	99.2077	74.8749
XAL108	PLAG 20	48.2085	0.0602	31.9163	0.2676	-0.0144	0.1443	15.4192	2.4645	0.1424	98.6084	76.9089
XAL108	PLAG 20	48.8567	0.0369	31.8468	0.2254	-0.0115	0.1357	14.9486	2.7626	0.1299	98.9311	74.3617
XAL108	PLAG 20	47.201	0.0119	32.888	0.3142	0.0339	0.0996	16.2663	2.0551	0.1549	99.0249	80.6478
XAL108	PLAG 22	47.7848	0.1426	19.2577	8.7279	0.1431	9.7131	9.0419	3.6025	0.3639	98.7775	56.5322
XAL108	PLAG 22	50.5042	0.0826	29.8335	0.5206	0.0018	0.1669	13.7729	3.777	0.2922	98.9517	65.7233
XAL108	PLAG 22	50.2121	0.0644	30.653	0.4838	0.0234	0.1393	13.8832	3.5485	0.209	99.2167	67.546
XAL108	PLAG 22	50.6396	0.0835	30.0386	0.4649	-0.0271	0.1522	13.7575	3.5199	0.2944	98.9236	67.1822
XAL108	PLAG 22	51.0341	0.0811	30.0337	0.413	-0.0061	0.1049	13.5557	3.6559	0.269	99.1413	66.1516
XAL108	PLAG 22	50.666	0.1102	30.1685	0.4974	0.0245	0.1326	13.4469	3.5294	0.2135	98.7892	66.9404
XAL108	PLAG 22	50.6112	0.0856	30.2905	0.4231	0.0469	0.1682	13.5346	3.5535	0.2903	99.0039	66.6381
XAL108	PLAG 21	49.6908	0.1014	30.5531	0.4811	-0.0094	0.1619	14.1423	3.4075	0.2451	98.7738	68.6504
XAL108	PLAG 21	50.4988	0.081	30.1913	0.4615	0.0148	0.1302	13.7351	3.5217	0.256	98.8904	67.2873
XAL108	PLAG 21	49.6156	0.1048	30.6553	0.4117	0.0058	0.1783	14.5326	3.1588	0.1789	98.8418	71.0229
XAL108	PLAG 21	50.2852	0.0844	30.2668	0.4527	-0.0029	0.1448	13.6557	3.4855	0.2475	98.6199	67.4084
XAL108	PLAG 21	49.3589	0.1109	30.7919	0.5295	-0.022	0.1348	14.2229	3.2707	0.2514	98.649	69.5803
XAL108	PLAG 23	50.6012	0.1106	30.5573	0.6093	-0.0072	0.126	13.8234	3.5792	0.1877	99.5875	67.3526
XAL108	PLAG 23	51.0417	0.1115	30.6816	0.4231	-0.0206	0.1198	14.2351	3.3787	0.2196	100.19	69.0667
XAL108	PLAG 23	50.6996	0.0928	30.3549	0.4698	-0.0368	0.1459	14.0286	3.5583	0.2453	99.5584	67.5755
XAL108	PLAG 23	51.2375	0.0732	29.9223	0.448	0.0314	0.1671	13.6673	3.6795	0.2369	99.4633	66.3209
XAL108	PLAG 23	51.1822	0.1633	30.0015	0.7374	0.0007	0.1438	13.8145	3.6911	0.2645	99.9989	66.3869
XAL108	PLAG 23	50.3978	0.0588	30.6475	0.4839	0.0346	0.143	14.2147	3.281	0.1962	99.4575	69.729
XAL108	PLAG 23	49.8681	0.0698	30.8441	0.5322	-0.017	0.1427	14.3031	3.4009	0.1897	99.3336	69.1524
XAL108	PLAG 24	50.6046	0.0798	29.9455	0.5081	-0.0238	0.2284	13.811	3.4241	0.2476	98.8253	68.0271
XAL108	PLAG 24	51.1873	0.0954	29.8803	0.4889	0.0737	0.1866	13.4496	3.8332	0.2394	99.4343	65.0644
XAL108	PLAG 24	50.4279	0.0851	30.2095	0.5138	-0.0101	0.1513	13.8908	3.4901	0.2413	98.9995	67.7808
XAL108	PLAG 24	50.7604	0.0671	30.3238	0.4887	-0.0217	0.1429	14.0937	3.431	0.2434	99.5294	68.4411
XAL108	PLAG 24	53.4327	0.2119	27.3906	0.8381	0.0307	0.1153	11.1544	4.8484	0.7233	98.7455	53.6541
XAL108	PLAG 24	51.0871	0.0983	30.5728	0.4666	0.0509	0.1467	13.5316	3.6041	0.2223	99.7804	66.5973
XAL108	PLAG 25	50.2828	0.1074	30.5732	0.5157	0.0134	0.1666	13.8931	3.4676	0.2519	99.2716	67.8771
XAL108	PLAG 25	50.6336	0.0953	30.3023	0.4237	-0.0332	0.1712	13.6959	3.6571	0.2671	99.2128	66.3824
XAL108	PLAG 25	50.5288	0.0756	30.608	0.4073	-0.0058	0.1372	13.9321	3.52	0.2477	99.451	67.6412
XAL108	PLAG 25	50.3013	0.1205	30.2284	0.4546	0.0412	0.1589	13.7174	3.5404	0.2222	98.7849	67.2795
XAL108	PLAG 26	50.5609	0.0908	30.2666	0.4186	-0.0004	0.1456	13.7513	3.6034	0.2137	99.0505	66.993
XAL108	PLAG 26	50.6857	0.0799	30.2963	0.4699	0.0238	0.116	13.6965	3.6601	0.2244	99.2526	66.5298
XAL108	PLAG 26	50.2783	0.0811	30.2058	0.429	0.0231	0.1554	14.092	3.5862	0.2305	99.0814	67.5674
XAL108	PLAG 26	49.7578	0.1301	30.7337	0.4964	0.0137	0.1498	13.6021	3.4657	0.2158	98.565	67.5693
XAL108	PLAG 26	50.6251	0.0793	29.8152	0.5208	0.0051	0.1652	13.4657	3.6634	0.2629	98.6026	65.9827
XAL108	PLAG 26	50.3947	0.0809	30.189	0.4626	-0.0264	0.159	13.8973	3.4771	0.1986	98.8328	68.0375
XAL108	PLAG 26	50.0539	0.0817	30.3196	0.5487	0.0556	0.1261	13.8245	3.2923	0.427	98.7293	68.1316
XAL108	PLAG 26	50.6803	0.1066	30.0778	0.4061	0.0177	0.1487	13.533	3.5423	0.2629	98.7753	66.8087
XAL108	PLAG 27	49.9665	0.043	30.8515	0.4599	0.009	0.1168	14.0742	3.3311	0.2199	99.0719	69.1133
XAL108	PLAG 27	50.8013	0.091	30.5002	0.4337	-0.0065	0.1347	13.6335	3.3612	0.2715	99.2205	68.034
XAL108	PLAG 27	50.6092	0.0684	30.301	0.4742	-0.017	0.1336	13.6629	3.4876	0.1817	98.9015	67.6698
XAL108	PLAG 27	50.6669	0.0994	30.4254	0.4335	0.0116	0.1424	13.567	3.4934	0.2736	99.1132	67.1154
XAL108	PLAG 27	50.1197	0.1172	30.3392	0.4451	-0.0238	0.1383	13.8472	3.309	0.2114	98.5032	68.9368
XAL108	PLAG 28	50.8555	0.1056	30.2705	0.5108	0.0058	0.1519	13.7145	3.5479	0.2521	99.4146	67.1125
XAL108	PLAG 28	50.1086	0.095	30.5258	0.4645	0.0188	0.1033	14.0397	3.4481	0.2284	99.0322	68.3145
XAL108	PLAG 28	50.6311	0.1111	30.2325	0.4401	0.0527	0.1431	13.8059	3.5242	0.2201	99.1609	67.5258
XAL108	PLAG 28	49.6727	0.1222	30.5019	0.5321	0.0112	0.1301	14.1685	3.2869	0.2241	98.6496	69.5096
XAL108	PLAG 29	51.1293	0.1265	29.9272	0.6711	0.0469	0.1549	13.4381	3.7109	0.3249	99.53	65.423
XAL108	PLAG 29	52.1557	0.1393	29.2385	0.5471	0.0217	0.1047	12.6106	4.3899	0.3812	99.5886	60.0261
XAL108	PLAG 30	50.6657	0.1109	30.2482	0.5326	0.0527	0.1362	13.8006	3.5766	0.2628	99.3863	67.0395
XAL108	PLAG 30	50.3706	0.1014	30.5933	0.4385	0.022	0.1432	14.0234	3.5887	0.1666	99.4477	67.6931
XAL108	PLAG 30	49.9258	0.0971	30.6269	0.4479	0.0296	0.15	13.7614	3.6363	0.2456	98.9205	66.6922
XAL108	PLAG 30	50.4777	0.0629	30.3994	0.4482	-0.0368	0.1596	13.5124	3.6892	0.2031	98.9156	66.139
XAL108	PLAG 30	50.3488	0.1016	30.1167	0.4208	0.0014	0.151	13.89	3.5345	0.2499	98.8148	67.4803
XAL108	PLAG 30	50.0647	0.0901	30.3108	0.5213	-0.0108	0.1745	13.7667	3.4805	0.2947	98.6924	67.4309
XAL108	PLAG 30	49.9748	0.1257	30.2282	0.5156	-0.0148	0.1677	13.8448	3.5818	0.237	98.6607	67.1798
XAL108	PLAG 31	50.7019	0.1042	30.4951	0.443	0.0618	0.1144	14.0157	3.5661	0.1965	99.6986	67.6992
XAL108	PLAG 31	50.1647	0.138	31.0797	0.3505	0.0531	0.1408	13.6111	3.5737	0.2586	99.3701	66.7675
XAL108	PLAG 31	50.9136	0.0982	30.1801	0.4524	0.0061	0.1334	13.1662	3.6562	0.2631	98.8693	65.5168
XAL108	PLAG 31	50.0465	0.1173	30.5687	0.5547	0.0509	0.1616	13.8301	3.3724	0.1858	98.8881	68.6218
XAL108	PLAG 31	53.1812	0.1595	28.6582	0.6524	-0.0011	0.0932	11.7625	4.6355	0.4892	99.6307	56.7318
XAL108	PLAG 31	50.4865	0.0975	30.5974	0.4548	-0.0061	0.1071	13.9317	3.2948	0.2221	99.1857	69.1109
XAL108	PLAG 31	50.7284	0.1252	30.0969	0.4607	0.0307	0.1488	13.8142	3.7128	0.2969	99.4146	66.139
XAL108	PLAG 32	50.4815	0.1346	30.2475	0.6325	0.0249	0.1471	13.7313	3.6723	0.2328	99.3044	66.4821
XAL108	PLAG 32	49.711	0.1016	30.5985	0.5983	0.0563	0.1688	13.6373	3.5098	0.2008	98.5824	67.4185
XAL108	PLAG 32	50.1879	0.1192	30.5936	0.5984	-0.0278	0.1176	14.5254	3.384	0.2282	99.7265	69.4307
XAL108	PLAG 32	50.259	0.1228	30.1885	0.4842	-0.0007	0.11	14.0197	3.5387	0.1815	98.9036	67.9266
XAL108	PLAG 32	50.8721	0.0748	30.0606	0.5448	0.0372	0.1613	13.603	3.6459	0.2693	99.269	66.2873
XAL108	PLAG 32	50.0056	0.1113	30.7113	0.383	0.0394	0.1667	14.1354	3.416	0.2156	99.1843	68.7059
XAL108	PLAG 32	49.5159	0.0919	30.5539	0.4936	0.0892	0.1711	13.9918	3.4366	0.2198	98.5638	68.3441
XAL108	PLAG 33	50.4088	0.1146	31.0832	0.5011	0.0069	0.1303	14.3889	3.2292	0.2241	100.087	70.1927
XAL108	PLAG 33	50.1848	0.1284	30.2962	0.4956	-0.0163	0.1366	14.0721	3.3993	0.2412	98.9381	68.6087
XAL108	PLAG 33	50.6893	0.0712	30.7183	0.4503	-0.0556	0.1934	14.0783	3.4035	0.1751	99.7238	68.8562
XAL108	PLAG 33	50.693	0.0729	30.4135	0.4327	0.0256	0.1224	14.2037	3.4841	0.1772	99.6252	68.5521
XAL108	PLAG 33	50.1326	0.1194	30.3277	0.492	-0.0119	0.1566	14.0335	3.4314	0.205	98.8861	68.4996
XAL108	PLAG 33	50.5241	0.0757	30.5328	0.4459	0.0592	0.1525	14.2525	3.3455	0.2497	99.6381	69.1727
XAL108	PLAG 33	50.4539	0.1117	30.3747	0.4381	-0.0321	0.1279	13.9733	3.611	0.2435	99.3019	67.1871
XAL108	PLAG 33	51.1003	0.0967	30.6275	0.4606	0.0415	0.1663	14.3161	3.475	0.205	100.489	68.6668
XAL108	PLAG 34	49.9273	0.1027	30.978	0.3945	0.0387	0.1391	14.5072	3.2891	0.2005	99.5773	70.0897
XAL108	PLAG 34	50.3133	0.1123	30.0718	0.3782	-0.0072	0.1125	14.0366	3.4413	0.1666	98.6254	68.5972
XAL108	PLAG 34	51.0075	0.076	30.1676	0.5668	0.0112	0.1566	13.1924	3.6566	0.2974	99.1321	65.4266
XAL108	PLAG 34	50.2015	0.0807	30.4977	0.5374	0.0051	0.1396	14.114	3.4175	0.2242	99.2175	68.6306
XAL108	PLAG 34	50.1138	0.099	30.3154	0.5179	0.0253	0.1348	13.9984	3.3529	0.2327	98.7901	68.8124
XAL108	PLAG 35	50.0775	0.0894	30.5837	0.4804	-0.004	0.1166	14.0576	3.4334	0.2221	99.0568	68.4556
XAL108	PLAG 35	50.6835	0.1354	30.4869	0.3421	-0.0137	0.1742	13.1304	3.7494	0.2696	98.9578	64.8853
XAL108	PLAG 35	50.7377	0.1109	29.7972	0.4697	-0.0275	0.1752	13.4785	3.6994	0.2181	98.6593	65.9657
XAL108	PLAG 35	50.4417	0.0764	30.3324	0.3905	0.0517	0.1448	13.4685	3.5968	0.2523	98.755	66.4202
XAL108	PLAG 35	51.1697	0.0671	30.1902	0.4772	-0.0271	0.1072	13.2284	3.8195	0.2803	99.3124	64.6109
XAL108	PLAG 35	50.1391	0.1121	30.5139	0.4139	0.0249	0.1373	13.7218	3.559	0.1816	98.8037	67.3348
XAL108	PLAG 36	51.2062	0.0658	29.9138	0.5174	-0.0155	0.1384	13.1162	3.8435	0.2803	99.066	64.2778
XAL108	PLAG 36	49.6646	0.1011	30.4208	0.4653	-0.0065	0.1484	14.1196	3.4433	0.2177	98.5744	68.5094
XAL108	PLAG 36	49.8328	0.1576	30.2609	0.4234	0.0589	0.1726	13.9511	3.4822	0.2306	98.5701	67.9638
XAL108	PLAG 36	50.3366	0.1077	30.3722	0.3293	0.026	0.1533	13.9269	3.5509	0.1987	99.0014	67.6415
XAL108	PLAG 36	50.7562	0.0696	30.2441	0.4968	-0.0126	0.1477	13.3338	3.7487	0.2246	99.0088	65.4103
XAL108	PLAG 36	50.5464	0.114	30.6092	0.3684	-0.0126	0.114	14.1333	3.4079	0.2349	99.5154	68.6744
XAL108	PLAG 36	50.7605	0.0957	30.2793	0.5111	0.021	0.1314	13.3587	3.7439	0.2288	99.1304	65.4636
XAL108	PLAG 36	50.3825	0.1004	30.6903	0.4275	0.0242	0.1243	14.2138	3.379	0.2114	99.5534	69.065
XAL108	PLAG 37	50.0586	0.0903	30.7314	0.404	-0.0231	0.1396	13.9778	3.3147	0.1858	98.879	69.2054
XAL108	PLAG 37	50.0055	0.0922	30.3523	0.5115	-0.0141	0.1619	13.9231	3.3435	0.2157	98.5916	68.8217
XAL108	PLAG 37	50.5569	0.0766	30.0417	0.5042	-0.0213	0.1287	13.4059	3.7512	0.2331	98.6769	65.4845
XAL108	PLAG 37	49.5602	0.0632	31.1744	0.4495	0.009	0.1427	14.2967	3.2205	0.2049	99.1211	70.1899
XAL108	PLAG 37	49.7896	0.0989	31.007	0.4485	-0.0202	0.1254	14.2377	3.2976	0.2284	99.2129	69.5303
XAL108	PLAG 38	49.3361	0.0467	30.8158	0.5326	0.0625	0.1212	14.4951	3.2251	0.1898	98.8247	70.5112
XAL108	PLAG 38	48.9146	0.0764	31.1612	0.385	0.0408	0.0698	15.0333	2.9342	0.2237	98.8391	72.9442
XAL108	PLAG 38	48.282	0.0957	31.5981	0.3506	0.0087	0.1123	15.2565	2.7542	0.1235	98.5816	74.8317
XAL108	PLAG 38	50.2056	0.1035	30.387	0.3906	0.0419	0.1149	13.7274	3.4567	0.2009	98.6283	67.8841
XAL108	PLAG 39	49.4476	0.0708	30.8214	0.4575	0.0018	0.1032	14.7371	3.2234	0.1663	99.029	70.9595
XAL108	PLAG 39	49.8593	0.0773	31.3158	0.3294	-0.0303	0.1296	14.2811	3.428	0.1665	99.5568	69.0483
XAL108	PLAG 39	49.8327	0.0678	30.5405	0.2452	0.03	0.1022	14.3305	3.2589	0.1985	98.6062	70.027
XAL108	PLAG 39	49.716	0.0568	31.0935	0.3339	0.0502	0.1592	14.217	3.0933	0.1964	98.9164	70.9131
XAL108	PLAG 39	49.7833	0.0837	30.818	0.295	0.0603	0.1181	14.0544	3.297	0.1538	98.6636	69.564
XAL108	PLAG 39	50.1943	0.0755	30.5092	0.3436	0.0076	0.0832	13.8261	3.5815	0.2008	98.8217	67.292
XAL108	PLAG 39	50.7662	0.1	30.2549	0.3367	-0.0061	0.1267	13.7288	3.548	0.1881	99.0434	67.3859
XAL108	PLAG 39	50.625	0.0733	29.9707	0.3443	-0.022	0.1454	13.9988	3.5351	0.1944	98.8649	67.8647
XAL108	PLAG 40	49.7794	0.0851	30.7469	0.5134	0.0412	0.1458	13.9729	3.4405	0.2028	98.9281	68.3593
XAL108	PLAG 40	50.4276	0.0945	31.1063	0.4894	-0.0098	0.14	14.1272	3.311	0.2178	99.904	69.3248
XAL108	PLAG 40	50.7555	0.116	30.0721	0.4165	-0.0014	0.1369	13.4959	3.6922	0.1796	98.8634	66.1848
XAL108	PLAG 40	49.9939	0.1034	30.4925	0.4531	-0.0011	0.112	13.7234	3.5989	0.2478	98.7239	66.842
XAL108	PLAG 40	50.0763	0.1283	30.794	0.4933	-0.0105	0.1481	14.044	3.3366	0.2114	99.2215	69.0673
XAL110	PLAG 1	49.1975	NA	31.9087	0.5862	0.0003	0.0775	14.7296	3.0162	0.0852	99.6012	72.598
XAL110	PLAG 1	49.3637	NA	32.0486	0.5265	-0.029	0.0709	14.5558	3.0436	0.107	99.687	72.0902
XAL110	PLAG 1	51.594	NA	30.6679	0.4567	-0.0013	0.0648	13.0505	4.2273	0.1575	100.217	62.479
XAL110	PLAG 1	51.9386	NA	30.3942	0.4791	0.0035	0.0691	12.7389	4.1825	0.1565	99.9624	62.1591
XAL110	PLAG 1	52.4488	NA	29.349	0.5095	0.0151	0.1129	12.4379	4.5714	0.1588	99.6034	59.5133
XAL110	PLAG 1	51.5172	NA	30.2811	0.5679	0.0214	0.0881	13.2163	4.1164	0.1384	99.9469	63.4472
XAL110	PLAG 1	51.4756	NA	30.3729	0.5144	0.0797	0.1022	13.27	3.8766	0.1328	99.8242	64.9111
XAL110	PLAG 1	52.4096	NA	29.7532	0.5297	0.0041	0.0578	12.4062	4.396	0.1845	99.7412	60.2796
XAL110	PLAG 1	51.8205	NA	28.9943	0.7808	-0.0391	0.0451	12.2715	4.5662	0.1528	98.5921	59.2351
XAL110	PLAG 1	52.8513	NA	29.2588	0.5363	0.0069	0.1048	12.0749	4.725	0.1522	99.7101	58.0345
XAL110	PLAG 1	51.5598	NA	30.2492	0.5839	0.0217	0.0838	13.0209	4.1158	0.1167	99.7518	63.1839
XAL110	PLAG 1	51.2825	NA	30.3046	0.5725	0.0778	0.089	13.6165	4.079	0.1157	100.138	64.4239
XAL110	PLAG 1	49.7832	NA	31.3441	0.5707	0.0151	0.0605	14.0057	3.6215	0.1085	99.5093	67.6979
XAL110	PLAG 1	49.7274	NA	31.8797	0.5567	-0.0066	0.0819	14.8219	3.2104	0.0923	100.364	71.4609
XAL110	PLAG 1	48.1798	NA	31.8668	0.5419	0.0079	0.0539	15.4335	2.8042	0.0706	98.9587	74.9484
XAL110	PLAG 2	52.4796	NA	29.5287	0.5183	0.015	0.0905	12.3666	4.5634	0.1949	99.757	59.2931
XAL110	PLAG 2	51.8902	NA	29.9659	0.4479	0.0273	0.0787	12.8386	4.3454	0.1419	99.736	61.514
XAL110	PLAG 2	48.8441	NA	32.0137	0.5517	0.036	0.0551	14.8858	2.8417	0.1251	99.3531	73.7753
XAL110	PLAG 2	52.4149	NA	30.05	0.5459	0.0385	0.067	12.6788	4.2274	0.1931	100.216	61.6713
XAL110	PLAG 2	52.0578	NA	29.678	0.5028	0.0151	0.0384	12.5365	4.1842	0.1673	99.1802	61.7336
XAL110	PLAG 2	48.9133	NA	31.8026	0.5297	-0.0309	0.0687	14.3753	2.9469	0.1089	98.7144	72.4644
XAL110	PLAG 2	52.5101	NA	29.2497	0.4513	0.0044	0.0714	12.1264	4.4396	0.1873	99.0402	59.4924
XAL110	PLAG 2	49.5514	NA	31.8404	0.5153	0.0211	0.0854	14.8761	3.1719	0.1002	100.162	71.7422
XAL110	PLAG 2	49.7935	NA	31.0992	0.5251	-0.0006	0.0941	14.3143	3.3294	0.0866	99.2416	70.0225
XAL110	PLAG 2	51.7313	NA	29.7683	0.5273	-0.0101	0.097	12.8519	4.2795	0.1977	99.4428	61.6938
XAL110	PLAG 2	52.0418	NA	29.8536	0.5411	-0.0035	0.0539	12.5914	4.4264	0.1683	99.673	60.5303
XAL110	PLAG 2	52.3042	NA	29.5204	0.4813	-0.0079	0.0541	12.5298	4.3809	0.1426	99.4055	60.7438
XAL110	PLAG 2	50.9573	NA	31.1855	0.575	0.0095	0.1085	13.8151	3.6226	0.145	100.418	67.2484
XAL110	PLAG 3	48.7961	NA	32.1794	0.5288	0.0457	0.0534	15.5621	2.7044	0.0835	99.9534	75.7072
XAL110	PLAG 3	52.1676	NA	29.4795	0.6496	-0.028	0.0798	12.2694	4.3274	0.2275	99.1727	60.2287
XAL110	PLAG 3	48.7566	NA	32.0198	0.5658	0.0057	0.0583	15.1219	2.9231	0.0725	99.5237	73.7735
XAL110	PLAG 3	49.5489	NA	31.8808	0.4985	0.0057	0.0361	15.019	3.117	0.1453	100.251	72.0936
XAL110	PLAG 3	48.77	NA	32.0043	0.5787	0.0091	0.075	15.1199	2.8151	0.1116	99.4836	74.3097
XAL110	PLAG 3	49.898	NA	31.3919	0.6172	0.0328	0.0445	14.8855	3.189	0.1359	100.195	71.5023
XAL110	PLAG 3	48.122	NA	31.9945	0.6153	0.0491	0.0756	15.6098	2.7191	0.0652	99.2506	75.746
XAL110	PLAG 3	48.9135	NA	31.9078	0.505	0.0249	0.0484	15.1732	2.8812	0.1134	99.5675	73.936
XAL110	PLAG 3	53.9045	NA	28.9825	0.8401	0.0016	0.1021	11.3008	4.8047	0.2983	100.234	55.5302
XAL110	PLAG 4	52.2169	NA	29.927	0.6303	0.0079	0.0623	12.5141	4.3213	0.2132	99.8929	60.7841
XAL110	PLAG 4	57.5955	NA	25.896	0.4474	0.0173	0.0529	8.0917	6.8283	0.3933	99.3224	38.6857
XAL110	PLAG 4	57.4118	NA	26.3626	0.4666	0.0158	0.0827	8.5138	6.6706	0.3926	99.9164	40.4403
XAL110	PLAG 4	57.1728	NA	26.1446	0.4269	0.0009	0.0501	8.4076	6.5205	0.3816	99.1051	40.6913
XAL110	PLAG 4	57.1974	NA	26.2579	0.4579	-0.0019	0.0653	8.7363	6.6768	0.4036	99.7933	41.0166
XAL110	PLAG 4	57.1172	NA	26.1963	0.4645	0.0142	0.0692	8.8134	6.6221	0.4457	99.7427	41.3233
XAL110	PLAG 4	56.111	NA	27.1869	0.4467	-0.0224	0.0543	9.3178	6.2064	0.3747	99.6755	44.38
XAL110	PLAG 4	56.1088	NA	26.8367	0.4268	0.03	0.0725	9.3611	6.2112	0.4432	99.4902	44.3057
XAL110	PLAG 4	55.9484	NA	26.9464	0.4687	-0.0536	0.0791	9.6735	5.7651	0.4334	99.2609	46.9082
XAL110	PLAG 4	56.2663	NA	26.8489	0.4668	0.0417	0.0398	9.2904	6.1512	0.3626	99.4676	44.5499
XAL110	PLAG 4	54.112	NA	28.2394	0.5759	-0.0249	0.129	11.2902	5.1859	0.2535	99.7611	53.8225
XAL110	PLAG 4	54.107	NA	27.89	0.4839	-0.0098	0.0909	11.0734	5.1656	0.2337	99.0347	53.4963
XAL110	PLAG 4	49.9353	NA	30.8955	0.577	-0.0123	0.0464	14.1884	3.501	0.1624	99.2937	68.4857
XAL110	PLAG 4	55.9294	NA	26.1373	0.4641	-0.0117	0.095	9.3303	6.3139	0.4029	98.6613	43.9362
XAL110	PLAG 4	56.6953	NA	26.1158	0.4668	0.0186	0.0955	8.688	6.3448	0.4575	98.8822	41.9425
XAL110	PLAG 4	56.92	NA	26.6479	0.3839	0.0707	0.0716	8.8337	6.7632	0.4528	100.144	40.8738
XAL110	PLAG 4	55.4082	NA	26.5838	1.4121	0.4756	0.1251	8.4375	5.931	0.4319	98.8051	42.8637
XAL110	PLAG 4	52.783	NA	29.3557	0.7704	-0.0101	0.1135	12.4904	4.299	0.2084	100.01	60.8749
XAL110	PLAG 4	52.6976	NA	29.2182	0.6674	0.0504	0.0764	12.1212	4.4969	0.2341	99.5621	59.0194
XAL110	PLAG 4	52.6698	NA	29.2897	0.8684	-0.0038	0.0664	12.2673	4.4124	0.2432	99.8134	59.718
XAL110	PLAG 4	52.2463	NA	29.7581	0.801	0.0032	0.0805	12.7985	4.3121	0.2067	100.206	61.3902
XAL110	PLAG 4	55.7891	NA	26.9992	0.6989	-0.0439	0.1143	9.7817	5.8634	0.3999	99.6027	46.873
XAL110	PLAG 4	55.6992	NA	27.22	0.8717	0.005	0.0325	9.9973	5.7177	0.4769	100.02	47.8059
XAL110	PLAG 4	52.5183	NA	28.9683	0.733	-0.0318	0.0877	12.0546	4.6679	0.213	99.2111	58.0789
XAL110	PLAG 4	51.7175	NA	29.8873	0.7222	-0.0375	0.0814	12.9594	4.1942	0.1919	99.7163	62.3712
XAL110	PLAG 4	51.9529	NA	28.9103	0.8838	0.0205	0.1429	12.8712	4.0372	0.3307	99.1495	62.5703
XAL110	PLAG 4	53.2608	NA	28.5865	0.7087	-0.0104	0.075	12.0678	4.8452	0.2783	99.8118	57.0119
XAL110	PLAG 4	57.0142	NA	26.301	0.4734	0.0224	0.0655	8.4091	6.6695	0.4919	99.447	39.9209
XAL110	PLAG 4	56.8637	NA	26.1147	0.4467	0.0464	0.0759	8.7863	6.6101	0.4296	99.3735	41.3287
XAL110	PLAG 4	56.9386	NA	25.9462	0.5145	-0.0274	0.0598	8.491	6.7666	0.4179	99.1073	39.9884
XAL110	PLAG 4	57.2477	NA	26.2794	0.5195	0.0252	0.0382	8.3632	6.6941	0.3483	99.5155	40.0306
XAL110	PLAG 4	57.4119	NA	26.2569	0.4488	0.0319	0.0413	8.5642	6.6207	0.354	99.7297	40.8462
XAL110	PLAG 4	51.6105	NA	29.9171	0.6974	0.0202	0.0807	12.9974	4.0526	0.1839	99.5598	63.2466
XAL110	PLAG 5	51.2288	NA	30.2602	0.5735	0.0041	0.0389	13.1076	4.1362	0.187	99.5365	62.971
XAL110	PLAG 5	52.5602	NA	29.2014	0.6584	-0.0076	0.1178	12.0372	4.7147	0.2353	99.5174	57.734
XAL110	PLAG 5	53.9304	NA	28.6071	0.5535	0.0325	0.0913	11.4359	5.2756	0.3178	100.244	53.536
XAL110	PLAG 5	52.4269	NA	29.6455	0.5261	0.0025	0.0874	12.3549	4.4286	0.2266	99.6985	59.8623
XAL110	PLAG 5	50.8955	NA	30.1774	0.7048	-0.0129	0.041	13.4751	3.9114	0.2096	99.402	64.7755
XAL110	PLAG 5	52.3724	NA	29.2472	0.6238	0.0252	0.0745	11.9013	4.5876	0.266	99.098	57.9986
XAL110	PLAG 5	52.3972	NA	29.6996	0.5605	-0.0151	0.0656	12.359	4.4365	0.1798	99.683	59.9912
XAL110	PLAG 5	51.0818	NA	29.9407	0.5753	0.0429	0.032	13.1485	3.9504	0.1543	98.9259	64.1987
XAL110	PLAG 5	52.0113	NA	29.4974	0.5354	-0.0369	0.0906	12.3857	4.2912	0.187	98.9617	60.7923
XAL110	PLAG 5	51.647	NA	29.8704	0.4219	0.0318	0.0967	13.0995	4.0841	0.1542	99.4056	63.3631
XAL110	PLAG 5	51.1735	NA	30.2717	0.4709	0.0293	0.0755	13.4167	4.1357	0.1385	99.7119	63.6894
XAL110	PLAG 5	51.1178	NA	30.2631	0.5402	0.0186	0.1177	13.0503	4.144	0.1394	99.3911	62.9982
XAL110	PLAG 5	48.2181	NA	32.1939	0.4722	-0.0126	0.0599	15.2612	2.7197	0.1132	99.0256	75.1131
XAL110	PLAG 5	51.9762	NA	29.9573	0.5232	-0.0098	0.1026	12.5429	4.462	0.2252	99.7796	60.0557
XAL110	PLAG 5	52.9466	NA	28.9318	0.7221	0.0596	0.0849	11.7194	4.7359	0.2436	99.4438	56.9468
XAL110	PLAG 5	51.6948	NA	30.3989	0.645	-0.047	0.0548	13.2243	3.9777	0.1176	100.066	64.3135
XAL110	PLAG 5	51.2721	NA	29.9522	0.6844	0.0101	0.0631	13.1574	4.2491	0.1745	99.563	62.4921
XAL110	PLAG 6	51.6132	NA	30.0425	0.552	-0.0114	0.0674	12.9163	4.045	0.147	99.3721	63.2794
XAL110	PLAG 6	51.5187	NA	29.3901	0.508	0.0441	0.0887	12.5267	4.4899	0.1779	98.7441	60.0412
XAL110	PLAG 6	51.5091	NA	29.9519	0.56	-0.0091	0.0938	12.8888	4.0542	0.1388	99.1874	63.2096
XAL110	PLAG 6	50.9774	NA	29.6546	0.5363	0.0189	0.0856	13.068	4.0473	0.1492	98.5375	63.5295
XAL110	PLAG 6	51.7079	NA	30.2582	0.4853	-0.0069	0.0653	12.7248	4.3286	0.143	99.7061	61.3884
XAL110	PLAG 6	52.1803	NA	30.1461	0.5317	0.0281	0.095	12.9167	4.349	0.1432	100.39	61.633
XAL110	PLAG 6	51.8129	NA	29.5983	0.6177	0.024	0.0847	12.2076	4.5147	0.1496	99.0094	59.3882
XAL110	PLAG 6	51.9198	NA	29.4103	0.7353	0.0542	0.1109	12.4142	4.4351	0.1655	99.2453	60.1543
XAL110	PLAG 6	52.6421	NA	29.5749	0.5361	0.0552	0.0561	12.6428	4.566	0.1788	100.252	59.8661
XAL110	PLAG 6	53.6907	NA	28.2886	0.4601	0.018	0.0829	11.1703	5.2384	0.2476	99.1966	53.3326
XAL110	PLAG 6	56.7538	NA	26.9191	0.4476	-0.0073	0.0664	8.7394	6.4524	0.4092	99.7806	41.8088
XAL110	PLAG 6	53.4079	NA	28.6636	0.5846	-0.0296	0.0596	11.3411	5.0653	0.2553	99.3477	54.4943
XAL110	PLAG 6	51.9692	NA	29.801	0.5691	0.0164	0.0583	12.2798	4.4214	0.1856	99.3006	59.8962
XAL110	PLAG 6	52.2528	NA	29.5485	0.6193	-0.0218	0.1037	12.4855	4.2819	0.2344	99.5044	60.8656
XAL110	PLAG 7	53.2667	NA	29.1191	1.026	0.041	0.1124	11.8593	4.53	0.2706	100.225	58.193
XAL110	PLAG 7	52.5512	NA	28.2073	1.0503	0.0202	0.1649	11.7832	4.5475	0.2552	98.5797	57.9981
XAL110	PLAG 7	52.424	NA	28.8563	0.9436	0.0016	0.1151	11.9871	4.6581	0.2365	99.2222	57.9143
XAL110	PLAG 7	52.6469	NA	28.5144	0.8098	-0.0397	0.0756	11.9005	4.574	0.2513	98.7328	58.1168
XAL110	PLAG 7	52.5459	NA	29.4909	0.7631	0.0028	0.1126	12.2808	4.5724	0.2254	99.9939	58.9761
XAL110	PLAG 7	52.4649	NA	29.652	0.7747	-0.0306	0.1045	12.2186	4.4775	0.2372	99.8988	59.3033
XAL110	PLAG 7	52.355	NA	29.3163	0.7717	0.0492	0.097	12.2966	4.3215	0.224	99.4313	60.3254
XAL110	PLAG 7	51.8386	NA	28.9839	0.703	0.0382	0.1024	12.5355	4.1656	0.2395	98.6067	61.5728
XAL110	PLAG 7	51.7663	NA	30.1846	0.5913	-0.0164	0.0951	12.7794	4.1049	0.2276	99.7329	62.4027
XAL110	PLAG 7	51.3092	NA	29.7067	0.6862	0.0091	0.096	13.2197	4.1255	0.175	99.3275	63.2714
XAL110	PLAG 7	51.6924	NA	30.2788	0.6303	-0.0009	0.1259	12.948	4.1408	0.1615	99.9767	62.7523
XAL110	PLAG 7	51.4079	NA	29.9669	0.7105	0.0259	0.0961	12.8893	4.1265	0.2024	99.4255	62.5755
XAL110	PLAG 7	50.9735	NA	29.9543	0.6981	0.0104	0.0851	12.9653	3.9513	0.1662	98.8042	63.8257
XAL110	PLAG 7	51.4599	NA	30	0.7072	0.0252	0.0754	12.7983	3.9308	0.1772	99.1739	63.6011
XAL110	PLAG 7	51.4981	NA	30.2317	0.6152	-0.0192	0.0971	13.3457	3.9357	0.1917	99.896	64.4836
XAL110	PLAG 7	51.3895	NA	30.0897	0.7084	-0.0328	0.1496	13.1169	3.9292	0.1934	99.5439	64.1175
XAL110	PLAG 7	51.2092	NA	29.9317	0.6954	-0.0167	0.0941	13.0296	4.1023	0.1943	99.2399	62.9916
XAL110	PLAG 7	51.5845	NA	29.9221	0.7569	-0.0315	0.1003	12.9722	3.9389	0.1703	99.4138	63.8936
XAL110	PLAG 7	52.161	NA	29.0033	0.7092	0.0186	0.1149	12.5304	4.5238	0.2214	99.2826	59.7239
XAL110	PLAG 8	51.0675	NA	29.6481	0.7276	0.0341	0.1181	12.8759	4.081	0.1966	98.7487	62.8253
XAL110	PLAG 8	50.9291	NA	30.0318	0.7459	0.0195	0.1139	12.9857	3.8283	0.1881	98.8424	64.4857
XAL110	PLAG 8	51.2725	NA	30.1789	0.7394	-0.017	0.0902	13.3596	3.9898	0.1514	99.7648	64.3535
XAL110	PLAG 8	50.9577	NA	29.7699	0.7093	-0.0457	0.102	13.1574	4.0379	0.1459	98.8345	63.752
XAL110	PLAG 8	51.195	NA	29.706	0.6498	-0.0177	0.0673	13.255	4.1108	0.1532	99.1195	63.4928
XAL110	PLAG 8	51.2618	NA	29.4524	0.6215	0.041	0.0839	12.857	4.1068	0.1577	98.5822	62.7891
XAL110	PLAG 8	50.9597	NA	29.9445	0.6277	0.0158	0.1199	12.8266	4.0261	0.1355	98.6556	63.2679
XAL110	PLAG 8	51.4627	NA	30.0477	0.6937	-0.0148	0.0779	13.0295	4.0274	0.1248	99.4488	63.6632
XAL110	PLAG 8	51.0677	NA	29.7168	0.6515	0.0003	0.1017	12.8807	4.1834	0.1561	98.7583	62.4154
XAL110	PLAG 8	51.0149	NA	29.9112	0.5513	0.0151	0.101	13.0922	3.8808	0.1603	98.7267	64.4743
XAL110	PLAG 8	51.3848	NA	29.5144	0.7301	0.0309	0.0981	12.5536	4.0876	0.1591	98.5586	62.3322
XAL110	PLAG 8	51.829	NA	29.2559	1.2492	-0.0135	0.1538	12.4156	4.0721	0.1574	99.1196	62.1641
XAL110	PLAG 8	51.3758	NA	29.6066	0.5949	0.0164	0.083	12.9139	4.1444	0.1324	98.8673	62.776
XAL110	PLAG 8	51.8417	NA	29.2988	0.6523	-0.0337	0.072	12.5409	4.3876	0.2091	98.9686	60.4972
XAL110	PLAG 8	51.5903	NA	30.0067	0.698	0.0514	0.0958	12.2428	4.2049	0.2066	99.0964	60.9161
XAL110	PLAG 8	51.3549	NA	29.4635	0.6255	0.0422	0.1006	13.0516	4.0957	0.1441	98.8781	63.2501
XAL110	PLAG 8	50.5351	NA	29.8503	0.6695	0.0211	0.1032	13.4922	3.9284	0.1571	98.7568	64.9038
XAL110	PLAG 8	51.1879	NA	30.0186	0.6852	0.0259	0.0893	13.0984	3.8883	0.1566	99.1501	64.4564
XAL110	PLAG 8	50.8144	NA	29.7822	0.7172	0.0284	0.122	13.0845	4.0812	0.1672	98.7971	63.3041
XAL110	PLAG 8	51.1811	NA	29.9327	0.7127	0.0214	0.0993	13.4406	4.16	0.1826	99.7304	63.4408
XAL110	PLAG 8	51.3274	NA	30.1869	0.6676	0.0038	0.0891	13.2651	3.9598	0.1545	99.6541	64.3473
XAL110	PLAG 8	51.1359	NA	30.2379	0.6605	0.0233	0.0667	12.9533	4.0359	0.1532	99.2667	63.3747
XAL110	PLAG 8	50.8779	NA	29.7384	0.7722	-0.0041	0.1133	13.0434	4.0526	0.1474	98.741	63.4633
XAL110	PLAG 8	51.3942	NA	30.0443	0.7526	0.0019	0.092	13.3047	3.9997	0.1764	99.7659	64.1107
XAL110	PLAG 9	51.3005	NA	29.8083	0.6707	0.0529	0.0559	13.2471	4.0925	0.1702	99.3982	63.5182
XAL110	PLAG 9	50.6881	NA	30.4066	0.7346	0.0249	0.0644	13.6388	3.7483	0.1693	99.475	66.132
XAL110	PLAG 9	51.2689	NA	30.0359	0.6375	0.024	0.1069	13.1374	4.0758	0.1981	99.4844	63.3165
XAL110	PLAG 9	51.0499	NA	29.7637	0.6542	0.012	0.1068	13.3976	3.7936	0.1635	98.9413	65.4902
XAL110	PLAG 9	53.0788	NA	29.204	0.873	0.0284	0.0886	12.0073	4.6123	0.2868	100.179	58.0198
XAL110	PLAG 10	51.4697	NA	30.0683	0.6584	0.0054	0.098	12.59	4.309	0.1675	99.3662	61.1549
XAL110	PLAG 10	50.3725	NA	30.1935	0.4855	0.012	0.0884	13.5513	3.7461	0.1334	98.5827	66.1378
XAL110	PLAG 10	52.0293	NA	29.667	0.5007	-0.0085	0.0573	12.7004	4.3773	0.1479	99.4715	61.0659
XAL110	PLAG 10	52.15	NA	29.5605	0.4598	0.0274	0.0924	12.7095	4.431	0.15	99.5806	60.7925
XAL110	PLAG 10	51.3586	NA	30.0536	0.4989	-0.0041	0.061	12.8557	4.0976	0.1352	99.0565	62.9194
XAL110	PLAG 10	52.0911	NA	29.3533	0.5427	0.0183	0.0801	12.4898	4.3909	0.1535	99.1199	60.5755
XAL110	PLAG 10	52.1714	NA	29.6936	0.5627	-0.0167	0.1001	12.6146	4.5288	0.1742	99.8287	60.019
XAL110	PLAG 10	51.8805	NA	29.3762	0.5162	0.046	0.0548	12.1945	4.3637	0.1847	98.6167	60.0384
XAL110	PLAG 10	51.1506	NA	30.4349	0.5844	-0.0158	0.0778	13.0466	4.0288	0.1486	99.4559	63.598
XAL110	PLAG 10	50.7937	NA	29.9073	0.4991	0	0.104	13.366	3.9178	0.1092	98.6971	64.9285
XAL110	PLAG 10	51.0541	NA	30.1682	0.554	0.0063	0.082	13.2713	3.9694	0.1281	99.2334	64.4024
XAL110	PLAG 10	52.1485	NA	29.144	0.4991	-0.0025	0.0884	12.2972	4.3876	0.1697	98.732	60.164
XAL110	PLAG 10	50.26	NA	31.519	0.5161	-0.0646	0.0444	14.1118	3.5444	0.0989	100.03	68.3593
XAL110	PLAG 10	56.2048	NA	26.6934	0.7358	0.0192	0.0875	9.0746	6.1245	0.4481	99.3879	43.8579
XAL110	PLAG 10	51.9273	NA	29.836	0.5142	0.023	0.0921	12.406	4.2974	0.1627	99.2586	60.8838
XAL110	PLAG 10	49.287	NA	31.4051	0.5171	0.0167	0.0659	14.327	3.4644	0.0973	99.1805	69.1723
XAL110	PLAG 11	52.6114	NA	28.7049	0.738	-0.0233	0.1209	11.9417	4.735	0.2686	99.0971	57.3295
XAL110	PLAG 11	49.5609	NA	31.7953	0.5494	-0.0066	0.1114	14.7222	3.25	0.1085	100.091	71.0093
XAL110	PLAG 11	47.9607	NA	32.4306	0.5954	0.0514	0.0755	15.8056	2.6949	0.0856	99.6999	76.0448
XAL110	PLAG 11	48.4906	NA	31.8409	0.56	0.029	0.1048	14.7948	2.8479	0.0803	98.7484	73.8118
XAL110	PLAG 11	48.668	NA	31.6566	0.5625	-0.0334	0.0449	15.2107	2.9996	0.0786	99.1875	73.3662
XAL110	PLAG 11	48.9572	NA	31.6245	0.5397	0.0006	0.0807	14.5889	2.8994	0.0828	98.7737	73.1838
XAL110	PLAG 11	48.023	NA	31.7379	0.5713	0.0271	0.0916	15.4804	2.7923	0.0731	98.7968	75.0733
XAL110	PLAG 11	48.7298	NA	32.0502	0.6208	-0.0363	0.0624	15.1843	2.6805	0.075	99.3667	75.453
XAL110	PLAG 11	50.9785	NA	29.8241	0.6023	-0.0259	0.1001	13.2592	4.0671	0.1349	98.9403	63.808
XAL110	PLAG 11	51.8571	NA	29.7241	0.6607	0.0356	0.1126	12.8211	4.1748	0.1749	99.5609	62.2864
XAL110	PLAG 11	55.3556	NA	26.9295	0.6547	0.0054	0.1304	9.814	5.9737	0.3724	99.2355	46.5838
XAL110	PLAG 12	51.2198	NA	30.3225	0.6272	-0.0366	0.0727	12.7661	4.1102	0.1451	99.227	62.6505
XAL110	PLAG 12	52.0276	NA	29.4769	0.5393	-0.0035	0.097	12.1801	4.5579	0.1777	99.0531	59.0128
XAL110	PLAG 12	52.5618	NA	29.3809	0.4925	0.0495	0.0824	11.9898	4.5318	0.1896	99.2783	58.7261
XAL110	PLAG 12	52.5974	NA	29.6782	0.5168	-0.0221	0.0987	12.609	4.2337	0.2226	99.9342	61.4013
XAL110	PLAG 12	50.4086	NA	30.3266	0.6363	0.0278	0.0763	13.2871	3.8595	0.2051	98.8272	64.7657
XAL110	PLAG 12	51.3936	NA	30.3827	0.6787	0.0066	0.0733	13.3682	3.9655	0.1867	100.055	64.3733
XAL110	PLAG 12	51.3817	NA	30.1058	0.6083	0.0009	0.0431	13.3163	3.9096	0.1724	99.538	64.6531
XAL110	PLAG 12	50.848	NA	30.4916	0.53	-0.005	0.0479	13.4949	3.5008	0.186	99.0941	67.3013
XAL110	PLAG 12	52.1987	NA	29.6075	0.4922	0.017	0.0805	12.4567	4.4913	0.2212	99.5651	59.7503
XAL110	PLAG 12	53.3828	NA	29.1494	0.56	0.0356	0.0771	11.5861	4.6271	0.2374	99.6555	57.2378
XAL110	PLAG 12	51.1724	NA	30.2628	0.525	-0.0161	0.0644	12.9009	4.1923	0.1724	99.2741	62.3446
XAL110	PLAG 12	52.0009	NA	29.4089	0.582	0.0498	0.0592	12.2618	4.3517	0.2588	98.9731	59.9744
XAL110	PLAG 12	51.8793	NA	29.844	0.5917	0.0085	0.0627	12.7878	4.1156	0.1597	99.4494	62.6067
XAL110	PLAG 12	64.1134	NA	20.772	1.004	0.0088	0.0792	2.6231	7.9197	3.4875	100.008	12.4267
XAL110	PLAG 12	63.6995	NA	19.7665	0.8089	0.0202	0.0522	2.0785	7.726	4.5527	98.7044	9.67569
XAL110	PLAG 12	52.2444	NA	29.804	0.613	-0.0123	0.0438	12.351	4.1079	0.2313	99.383	61.5701
XAL110	PLAG 12	52.1008	NA	29.3719	0.5778	-0.0013	0.0828	12.3888	4.4308	0.159	99.1107	60.1507
XAL110	PLAG 12	52.4293	NA	29.4908	0.4489	-0.0041	0.0851	12.3852	4.4978	0.1538	99.4868	59.8101
XAL110	PLAG 12	52.0236	NA	30.1348	0.4875	0.018	0.0761	12.5588	4.3583	0.1355	99.7924	60.9439
XAL110	PLAG 12	50.7478	NA	30.1914	0.501	-0.0177	0.0785	13.0813	3.859	0.1616	98.6029	64.5758
XAL110	PLAG 12	50.8861	NA	30.8753	0.5069	0.0489	0.0973	13.4751	3.7398	0.1165	99.7458	66.1149
XAL110	PLAG 12	53.0144	NA	29.1303	0.6056	0.0151	0.1068	12.0682	4.6305	0.2203	99.7912	58.2717
XAL110	PLAG 12	56.5679	NA	26.3804	0.8846	0.0829	0.1143	8.6953	6.1943	0.542	99.4617	42.3125
XAL110	PLAG 12	52.5074	NA	29.3418	0.5795	0.0631	0.043	12.3077	4.5116	0.1513	99.5054	59.5943
XAL110	PLAG 12	51.5971	NA	29.7074	0.5465	0.0416	0.0677	12.6307	4.4489	0.1769	99.2168	60.4573
XAL110	PLAG 12	52.3168	NA	29.5782	0.5891	0.0006	0.0755	12.5103	4.4854	0.1911	99.7471	59.9877
XAL110	PLAG 13	55.8022	NA	27.1376	0.9199	0.0148	0.114	9.4714	5.9524	0.4066	99.8189	45.6957
XAL110	PLAG 13	51.3259	NA	29.9066	0.7376	-0.0107	0.108	13.0056	4.1344	0.1645	99.3718	62.8809
XAL110	PLAG 13	51.9894	NA	29.8261	0.7877	0.0006	0.1174	13.165	4.1117	0.1601	100.158	63.3051
XAL110	PLAG 13	50.7519	NA	30.094	0.6443	-0.0035	0.1059	13.4476	3.9705	0.1193	99.13	64.7309
XAL110	PLAG 13	51.2983	NA	30.2916	0.6805	0.0025	0.0996	13.1594	4.0711	0.143	99.7459	63.5819
XAL110	PLAG 13	50.4398	NA	30.4128	0.6057	0.0274	0.1028	13.5025	3.8756	0.1206	99.0872	65.3583
XAL110	PLAG 13	51.7438	NA	29.923	0.6151	-0.0423	0.101	12.97	4.1062	0.1606	99.5775	62.986
XAL110	PLAG 13	51.562	NA	29.6892	0.6243	-0.0041	0.0528	13.3216	3.9983	0.1807	99.4248	64.1314
XAL110	PLAG 13	50.8891	NA	30.3572	0.6891	0.0731	0.0859	13.6371	3.8213	0.1403	99.6931	65.8186
XAL110	PLAG 13	51.0592	NA	30.0708	0.6583	0.0271	0.0981	13.1309	3.8934	0.1562	99.094	64.4863
XAL110	PLAG 13	51.6238	NA	29.6246	0.6845	0.0432	0.0739	13.1593	3.9962	0.1655	99.371	63.917
XAL110	PLAG 13	51.9424	NA	29.1541	0.8506	-0.0318	0.1225	12.8504	4.35	0.2237	99.462	61.2246
XAL110	PLAG 13	56.1358	NA	27.032	0.8516	0.0293	0.0722	9.284	5.9775	0.4254	99.8078	45.0508
XAL110	PLAG 14	52.0649	NA	29.8852	0.8859	-0.0154	0.0909	12.6467	4.1861	0.2365	99.9807	61.6808
XAL110	PLAG 14	51.6794	NA	29.9329	0.7091	-0.0451	0.0832	12.868	4.14	0.1563	99.5237	62.63
XAL110	PLAG 14	51.0483	NA	30.0605	0.6936	0.0022	0.089	13.1441	3.9529	0.1421	99.1326	64.2221
XAL110	PLAG 14	50.3486	NA	30.359	0.7126	0.0274	0.1183	13.44	3.7304	0.1424	98.8787	66.0117
XAL110	PLAG 14	51.3705	NA	30.351	0.6345	0.0016	0.0933	13.0973	4.0544	0.1496	99.7521	63.5404
XAL110	PLAG 14	52.0799	NA	29.6771	0.6477	0.0243	0.0941	12.2442	4.2499	0.2432	99.2604	60.5416
XAL110	PLAG 14	52.0594	NA	29.2067	0.6767	-0.0136	0.0898	12.4993	4.5114	0.2246	99.2543	59.7171
XAL110	PLAG 14	52.6953	NA	29.0065	0.8074	0.0347	0.1046	11.8246	4.6405	0.2564	99.37	57.6035
XAL110	PLAG 15	50.0219	NA	30.6951	0.4931	-0.0104	0.0547	13.7314	3.5714	0.1417	98.6987	67.4332
XAL110	PLAG 15	51.8927	NA	30.2867	0.4553	0.0312	0.0907	12.9303	4.2448	0.1471	100.079	62.2041
XAL110	PLAG 15	48.1965	NA	32.2824	0.5011	0.0218	0.0525	15.3106	2.609	0.0845	99.0584	76.0491
XAL110	PLAG 15	48.021	NA	32.0965	0.542	-0.011	0.0817	15.0918	2.7144	0.0771	98.6135	75.1002
XAL110	PLAG 15	49.8056	NA	31.4416	0.5206	0.0132	0.0762	14.2343	3.1923	0.1165	99.4004	70.6416
XAL110	PLAG 15	55.9334	NA	26.7132	0.6397	-0.0028	0.0809	9.3229	6.3497	0.4498	99.4868	43.668
XAL110	PLAG 15	49.0594	NA	31.9659	0.5316	0.035	0.0931	15.3251	2.909	0.075	99.9941	74.1103
XAL110	PLAG 15	48.7391	NA	31.8195	0.5165	-0.0148	0.0767	14.516	2.8402	0.1021	98.5954	73.3977
XAL110	PLAG 15	50.5369	NA	30.3199	0.569	0.0098	0.1149	13.7053	3.504	0.122	98.8817	67.877
XAL110	PLAG 15	48.8522	NA	31.7971	0.5621	0.017	0.1223	14.855	3.1	0.1176	99.4233	72.0943
XAL110	PLAG 15	49.0453	NA	31.5014	0.5314	0.0233	0.0967	14.9319	2.9264	0.0705	99.1269	73.5144
XAL110	PLAG 15	55.6403	NA	26.4466	0.8345	-0.0309	0.0762	9.6788	6.1611	0.4313	99.2378	45.3519
XAL110	PLAG 16	52.0539	NA	29.7543	0.7527	0.005	0.0767	12.9675	3.9671	0.2243	99.8015	63.5237
XAL110	PLAG 16	51.1701	NA	29.9223	0.5075	0.0117	0.0792	13.2557	3.9693	0.1814	99.0972	64.1774
XAL110	PLAG 16	52.0937	NA	30.1966	0.4974	0.0151	0.0933	12.8447	4.0511	0.1221	99.914	63.2088
XAL110	PLAG 16	55.8065	NA	27.4396	0.4776	-0.0414	0.0823	9.7471	5.6702	0.2383	99.4203	48.0345
XAL110	PLAG 16	52.489	NA	29.158	0.5803	0.0322	0.076	11.974	4.6916	0.1689	99.1698	57.9425
XAL110	PLAG 16	51.2733	NA	30.2865	0.5009	0.0174	0.0941	13.0896	4.0459	0.1615	99.469	63.5312
XAL110	PLAG 16	58.5144	NA	24.6029	0.6903	0.0518	0.1161	7.055	7.5535	0.8986	99.4825	32.3711
XAL110	PLAG 16	50.7751	NA	30.0314	0.5574	-0.0041	0.0639	13.3209	3.964	0.1568	98.8655	64.4112
XAL110	PLAG 16	51.011	NA	30.6094	0.6896	-0.0202	0.0901	13.3517	3.7831	0.133	99.6477	65.5906
XAL110	PLAG 16	51.3381	NA	30.167	0.4989	0.0003	0.0598	12.7744	3.8519	0.2003	98.8907	63.9252
XAL110	PLAG 16	51.2916	NA	30.0942	0.6149	0.0256	0.0626	12.9848	3.9313	0.1824	99.1873	63.9138
XAL110	PLAG 16	51.8224	NA	30.0129	0.6111	0.0032	0.0637	13.051	4.1251	0.1413	99.8307	63.0966
XAL110	PLAG 16	53.2829	NA	28.8228	0.5409	0	0.0621	11.4437	4.8293	0.2131	99.1947	55.9963
XAL110	PLAG 16	51.4051	NA	30.3407	0.6022	-0.0041	0.066	13.3091	3.9667	0.1414	99.8272	64.4326
XAL110	PLAG 16	51.9638	NA	30.2686	0.5914	-0.0271	0.1433	12.6877	4.1289	0.1509	99.9074	62.3809
XAL110	PLAG 16	51.2041	NA	29.7681	0.559	0.0167	0.0593	13.0431	3.9898	0.1488	98.7889	63.8106
XAL110	PLAG 17	56.0467	NA	26.9582	0.6447	0.0063	0.0983	9.5001	5.8862	0.3754	99.5159	46.1189
XAL110	PLAG 17	51.3196	NA	29.7719	0.6392	-0.024	0.1075	13.3437	3.9328	0.164	99.2546	64.6001
XAL110	PLAG 17	51.3857	NA	29.5014	0.5846	-0.0038	0.0755	12.6992	4.2715	0.1846	98.6987	61.5012
XAL110	PLAG 17	51.9182	NA	29.0305	0.4979	-0.0164	0.0671	12.272	4.5656	0.1722	98.5071	59.174
XAL110	PLAG 17	52.8766	NA	28.9882	0.4947	-0.0319	0.0495	11.8011	4.8009	0.1736	99.1528	57.0226
XAL110	PLAG 17	50.9316	NA	30.0714	0.5229	-0.0136	0.0802	13.192	3.7911	0.1566	98.7323	65.1815
XAL110	PLAG 17	54.8574	NA	27.2641	0.559	0.0376	0.0773	10.1343	5.6277	0.2747	98.8321	49.0867
XAL110	PLAG 17	53.1888	NA	28.6962	0.486	0.005	0.081	11.399	4.8432	0.1862	98.8855	55.9187
XAL110	PLAG 17	51.8618	NA	29.0251	0.5609	0.0107	0.0856	12.42	4.5093	0.1657	98.6392	59.7755
XAL110	PLAG 17	49.5686	NA	26.5502	4.3274	0.0846	1.6236	13.7747	3.5112	0.3039	99.7442	67.2251
XAL110	PLAG 17	50.2119	NA	30.7304	0.6482	-0.0224	0.0878	13.8525	3.6439	0.1176	99.2698	67.2894
XAL110	PLAG 17	51.3335	NA	30.4091	0.6171	0.0126	0.0863	13.1187	3.781	0.1382	99.4966	65.1844
XAL110	PLAG 17	51.1199	NA	30.317	0.7886	-0.0082	0.1132	12.9576	3.9739	0.1652	99.4273	63.6879
XAL110	PLAG 18	55.6416	NA	27.1752	0.866	0.0429	0.1038	9.2346	6.0128	0.3462	99.4231	44.9861
XAL110	PLAG 18	53.3716	NA	28.3747	0.7375	0.0281	0.1116	11.4349	4.915	0.2883	99.2615	55.3148
XAL110	PLAG 18	50.7151	NA	30.2848	0.689	0.0271	0.1016	13.3714	3.7035	0.1374	99.0299	66.0746
XAL110	PLAG 18	52.3733	NA	28.7972	0.584	-0.0041	0.1006	11.958	4.4758	0.2434	98.5282	58.7694
XAL110	PLAG 18	50.9024	NA	30.4084	0.6563	0.0202	0.1021	13.2107	3.8274	0.1263	99.2539	65.1189
XAL110	PLAG 18	50.226	NA	30.6605	0.6693	0.0117	0.1013	13.6826	3.5654	0.1348	99.0515	67.4178
XAL110	PLAG 18	50.2557	NA	31.1962	0.7127	0.0236	0.0861	14.1335	3.5131	0.1243	100.045	68.4804
XAL110	PLAG 18	49.8901	NA	30.4938	0.8691	0.0504	0.2972	14.3189	2.9988	0.1089	99.0273	72.0449
XAL110	PLAG 18	50.6921	NA	30.6375	0.5715	0.024	0.1006	13.7813	3.5599	0.1304	99.4971	67.6267
XAL110	PLAG 18	51.5842	NA	30.036	0.6434	0.0372	0.1111	12.9537	3.8964	0.157	99.4191	64.1539
XAL110	PLAG 18	50.6972	NA	30.0862	0.6911	0.0287	0.0803	13.3579	3.8122	0.145	98.8986	65.3865
XAL110	PLAG 18	52.3482	NA	29.0972	0.7798	0.0309	0.0794	11.8471	4.5831	0.24	99.0057	57.9983
XAL110	PLAG 18	51.6237	NA	29.9319	0.6512	0.0328	0.0883	12.7672	4.0757	0.1829	99.3537	62.7059
XAL110	PLAG 18	50.7474	NA	30.1285	0.6102	-0.0063	0.0859	13.3114	3.9672	0.1502	98.9944	64.4018
XAL110	PLAG 18	51.2027	NA	29.6844	0.6193	0.0057	0.1276	13.2558	3.9679	0.1625	99.0257	64.2566
XAL110	PLAG 19	52.3943	NA	29.045	0.7137	0.0568	0.0927	12.4407	4.4019	0.2131	99.3582	60.2157
XAL110	PLAG 19	51.7463	NA	29.3408	0.737	-0.0438	0.1341	13.164	4.0364	0.1497	99.2645	63.7586
XAL110	PLAG 19	50.2712	NA	30.5515	0.6591	-0.0426	0.1198	13.5603	3.7935	0.1232	99.0359	65.9168
XAL110	PLAG 19	49.0342	NA	30.9416	0.4781	0.0117	0.1475	14.827	3.1085	0.0666	98.6151	72.2158
XAL110	PLAG 19	50.4983	NA	30.1887	0.5538	-0.0129	0.0603	13.5013	3.7625	0.1312	98.6832	65.9696
XAL110	PLAG 19	50.9153	NA	30.2582	0.5539	0.0155	0.0797	13.0681	3.8069	0.1227	98.8202	65.005
XAL110	PLAG 19	50.6082	NA	30.437	0.5271	0.0013	0.0815	13.2289	3.764	0.1474	98.7953	65.4389
XAL110	PLAG 19	51.0899	NA	30.718	0.4116	-0.0243	0.0693	13.2533	3.8696	0.1241	99.5113	64.9565
XAL110	PLAG 19	50.9913	NA	31.0432	0.5381	0.0088	0.0829	13.3243	3.9799	0.1529	100.121	64.342
XAL110	PLAG 19	50.9228	NA	30.392	0.4117	0.0259	0.0623	13.1987	3.8165	0.1003	98.9301	65.261
XAL110	PLAG 19	51.127	NA	30.6681	0.5362	-0.0129	0.0958	12.903	4.1326	0.1205	99.5702	62.8647
XAL110	PLAG 19	51.7559	NA	29.8731	0.4706	0.0284	0.0657	12.6414	4.0777	0.1505	99.0632	62.5824
XAL110	PLAG 19	51.96	NA	29.9883	0.5538	0.0265	0.0956	12.7288	4.0794	0.1228	99.5553	62.8358
XAL110	PLAG 19	50.645	NA	30.3422	0.5846	0.0341	0.0437	12.7334	3.9956	0.142	98.5206	63.2463
XAL110	PLAG 19	50.7019	NA	30.0604	0.5404	-0.012	0.1038	12.9185	4.0998	0.1383	98.5511	63.0105
XAL110	PLAG 19	51.5004	NA	30.0557	0.5674	-0.0227	0.1083	12.9455	4.1829	0.145	99.4824	62.5764
XAL110	PLAG 19	50.6587	NA	30.4365	0.4601	0.0003	0.0954	13.1717	3.9798	0.1187	98.9213	64.2047
XAL110	PLAG 19	50.4704	NA	30.7419	0.5144	0.0085	0.0878	13.5998	3.7147	0.1255	99.263	66.4329
XAL110	PLAG 19	51.2152	NA	30.2797	0.4401	0.0022	0.082	12.9606	3.9288	0.1091	99.0177	64.1608
XAL110	PLAG 19	49.6909	NA	31.3484	0.453	0.0158	0.0839	13.8902	3.5143	0.1145	99.111	68.1347
XAL110	PLAG 20	52.1019	NA	28.9273	0.7684	0.0167	0.114	12.0233	4.3943	0.2272	98.5731	59.386
XAL110	PLAG 20	51.5581	NA	29.8747	0.7574	0.0338	0.132	13.0421	3.9577	0.1778	99.5336	63.8826
XAL110	PLAG 20	50.5332	NA	30.2353	0.7378	-0.006	0.1132	13.058	3.908	0.178	98.7575	64.1925
XAL110	PLAG 20	52.1961	NA	29.3686	0.6502	0.0508	0.1369	12.5092	4.0851	0.2003	99.1972	62.1112
XAL110	PLAG 20	51.0864	NA	30.1591	0.7723	0.0319	0.1151	12.9215	4.0483	0.2092	99.3436	63.042
XAL110	PLAG 20	51.7412	NA	29.7084	0.7684	0.0151	0.1242	12.9694	4.0294	0.1519	99.508	63.4451
XAL110	PLAG 20	51.6816	NA	29.9176	0.6921	0.0145	0.1186	12.3972	4.0392	0.1736	99.0344	62.255
XAL110	PLAG 20	52.0254	NA	29.7193	0.7249	0.0132	0.1127	12.2731	4.061	0.2035	99.1332	61.7847
XAL110	PLAG 20	51.7897	NA	29.4748	0.6528	0.0076	0.1079	12.5903	4.1902	0.1621	98.9754	61.8193
XAL110	PLAG 20	52.0201	NA	29.5263	0.7448	-0.0183	0.0655	12.3504	4.3001	0.1673	99.1563	60.7462
XAL110	PLAG 20	51.3356	NA	29.8838	0.7316	-0.0227	0.1247	13.0578	3.8504	0.1714	99.1326	64.5484
XAL110	PLAG 20	51.3262	NA	30.3235	0.7995	-0.0224	0.0777	13.2855	3.9897	0.1741	99.9536	64.1413
XAL110	PLAG 20	51.9003	NA	29.9674	0.7789	0.0032	0.1156	13.2623	4.1218	0.2062	100.356	63.2531
XAL110	PLAG 20	51.2823	NA	30.4504	0.681	-0.0104	0.1146	13.1699	3.9459	0.1772	99.8108	64.1761
XAL110	PLAG 20	51.1079	NA	29.9434	0.6507	0.006	0.0849	13.4525	3.7926	0.1587	99.1967	65.6071
XAL110	PLAG 20	51.4051	NA	30.2786	0.6959	0.0202	0.0972	12.9527	3.9056	0.1562	99.5115	64.1018
XAL110	PLAG 20	51.0485	NA	29.798	1.1638	0.0463	0.0861	12.6335	3.6588	0.2044	98.6393	64.7939
XAL110	PLAG 20	52.1701	NA	29.5726	0.7663	0.0003	0.0872	12.4457	4.1852	0.2276	99.455	61.3376
XAL110	PLAG 20	52.1081	NA	29.2478	0.7887	0.036	0.1295	12.0638	4.3994	0.2052	98.9784	59.5178
XAL110	PLAG 20	52.6916	NA	28.7303	0.8371	-0.0028	0.0717	12.1008	4.4692	0.2704	99.1682	58.9982
XAL110	PLAG 20	55.5055	NA	26.5035	0.837	-0.0038	0.1115	9.2727	6.0492	0.4569	98.7325	44.6589
XAL110	PLAG 21	51.8094	NA	29.4347	0.7003	-0.0139	0.1044	12.3481	4.4333	0.1957	99.012	59.9312
XAL110	PLAG 21	52.5016	NA	29.4569	0.5031	-0.0391	0.0844	11.8692	4.6554	0.1717	99.2033	57.9034
XAL110	PLAG 21	51.3981	NA	29.7304	0.5489	0.0322	0.067	12.9267	4.1434	0.14	98.9868	62.7772
XAL110	PLAG 21	52.3819	NA	29.5176	0.4972	-0.0038	0.0868	12.3304	4.3095	0.1823	99.302	60.6035
XAL110	PLAG 21	52.0487	NA	29.7218	0.4682	0.0025	0.1067	12.6369	4.2972	0.1619	99.444	61.3265
XAL110	PLAG 21	52.3308	NA	29.0471	0.497	0.0114	0.0693	12.4974	4.2372	0.1487	98.8388	61.4365
XAL110	PLAG 21	52.7108	NA	29.3972	0.4463	0.0438	0.0666	12.2528	4.531	0.1668	99.6153	59.3339
XAL110	PLAG 21	51.8684	NA	30.1941	0.5907	-0.0069	0.0765	12.5946	4.2062	0.129	99.6526	61.8599
XAL110	PLAG 21	51.8763	NA	29.8907	0.5652	-0.0246	0.0472	12.4487	4.4616	0.1671	99.4322	60.0759
XAL110	PLAG 22	50.1977	NA	31.1939	0.5887	0.0303	0.0519	13.7469	3.4758	0.155	99.4401	67.982
XAL110	PLAG 22	51.4467	NA	30.2586	0.5191	0.0388	0.1194	12.9019	3.921	0.1384	99.3439	63.9904
XAL110	PLAG 22	52.4426	NA	29.8805	0.5031	-0.0123	0.0984	12.5483	4.3406	0.1542	99.9554	60.9527
XAL110	PLAG 22	51.0532	NA	29.9964	0.4616	-0.0211	0.0685	13.0543	4.1839	0.1949	98.9917	62.5869
XAL110	PLAG 22	52.2089	NA	29.92	0.5034	-0.0047	0.0758	12.4463	4.3695	0.1113	99.6304	60.7553
XAL110	PLAG 22	52.0358	NA	30.1697	0.5552	-0.0256	0.0591	12.5037	4.2455	0.1549	99.6984	61.3803
XAL110	PLAG 22	51.7127	NA	29.9846	0.4885	-0.0057	0.0544	12.8037	4.2922	0.145	99.4754	61.7234
XAL110	PLAG 23	62.6915	NA	21.8709	0.7649	0.0009	0.1133	3.9523	7.7838	2.9379	100.115	18.352
XAL110	PLAG 23	51.8979	NA	29.4654	0.7161	0.0378	0.0899	12.3357	4.0018	0.1946	98.7391	62.2722
XAL110	PLAG 23	50.9432	NA	30.1899	0.6985	0.0148	0.0751	13.0788	3.8049	0.1378	98.943	64.9774
XAL110	PLAG 23	48.66	NA	32.0002	0.5816	0.023	0.0372	15.26	2.8103	0.0884	99.4608	74.6169
XAL110	PLAG 23	48.4186	NA	32.4812	0.4904	0.0107	0.072	15.2593	2.572	0.0721	99.3762	76.2981
XAL110	PLAG 23	49.7565	NA	30.7317	0.4797	0.0208	0.0893	14.1466	3.2914	0.0819	98.5977	70.0315
XAL110	PLAG 23	51.159	NA	30.7332	0.7088	-0.0413	0.1016	13.5789	3.901	0.1815	100.323	65.1127
XAL110	PLAG 23	51.4923	NA	29.8521	0.6214	-0.0281	0.091	12.8333	4.1321	0.2316	99.2256	62.338
XAL110	PLAG 23	54.417	NA	28.1557	0.637	0.0379	0.0932	11.1626	5.2075	0.2982	100.009	53.3044
XAL110	PLAG 24	51.6073	NA	29.3596	0.7362	-0.0218	0.1541	12.3382	4.4421	0.2082	98.8239	59.8227
XAL110	PLAG 24	51.4169	NA	29.7591	0.5777	0.03	0.037	13.1048	3.8612	0.1781	98.9649	64.5419
XAL110	PLAG 24	51.4193	NA	30.1532	0.5982	0.0183	0.0963	12.8776	4.0523	0.1527	99.368	63.1482
XAL110	PLAG 24	50.3084	NA	30.5695	0.5888	0.012	0.0923	13.9091	3.672	0.1238	99.2758	67.1885
XAL110	PLAG 24	50.2617	NA	30.6664	0.5644	-0.0016	0.0861	13.7825	3.6786	0.1288	99.1668	66.9286
XAL110	PLAG 24	50.8562	NA	30.4876	0.565	0.0158	0.0595	13.5762	3.7094	0.0993	99.3689	66.5279
XAL110	PLAG 24	50.6	NA	30.7108	0.5485	0.0076	0.1337	13.4194	3.6453	0.1179	99.1832	66.5762
XAL110	PLAG 24	50.7591	NA	30.4534	0.6172	-0.0164	0.0917	13.1225	3.7047	0.1362	98.8684	65.6494
XAL110	PLAG 24	51.2664	NA	30.2706	0.5955	0.017	0.1094	13.7837	3.7388	0.1268	99.9084	66.5857
XAL110	PLAG 24	56.1123	NA	26.8644	0.5942	-0.0688	0.1476	9.6703	5.9161	0.4539	99.6899	46.2321
XAL110	PLAG 24	50.796	NA	29.9946	0.5873	0.0249	0.0995	13.0001	3.9618	0.14	98.6042	63.9259
XAL110	PLAG 24	51.4984	NA	30.025	0.6478	-0.0041	0.1233	12.9001	3.972	0.1458	99.3083	63.6677
XAL110	PLAG 24	51.7228	NA	30.0609	0.6015	-0.0063	0.1024	13.0556	4.2841	0.1493	99.9703	62.2109
XAL110	PLAG 24	51.8839	NA	29.7512	0.7357	-0.0133	0.1123	12.5996	4.1121	0.2049	99.3865	62.1129
XAL110	PLAG 25	51.2921	NA	29.9886	0.6946	0.0054	0.1437	12.8933	4.0151	0.1734	99.2062	63.3089
XAL110	PLAG 25	50.8451	NA	30.0831	0.6873	-0.0098	0.095	12.8335	4.0781	0.1737	98.7861	62.8472
XAL110	PLAG 25	50.7263	NA	30.3693	0.7135	0.0284	0.1114	13.1131	3.7747	0.1617	98.9984	65.1209
XAL110	PLAG 25	50.8822	NA	30.0562	0.6418	0.0028	0.1004	13.145	3.919	0.1907	98.9382	64.2348
XAL110	PLAG 25	50.1556	NA	30.6541	0.6312	-0.0142	0.056	14.0997	3.6097	0.1548	99.3468	67.7342
XAL110	PLAG 25	50.8748	NA	30.5507	0.5513	0.0063	0.0766	13.7184	3.7851	0.1355	99.6987	66.1783
XAL110	PLAG 25	50.4555	NA	30.7301	0.5192	-0.0069	0.0944	13.441	3.6542	0.117	99.0044	66.5626
XAL110	PLAG 25	48.2021	NA	32.1465	0.4901	0.0035	0.0745	15.6014	2.6889	0.0787	99.2858	75.8781
XAL110	PLAG 25	49.0997	NA	32.2729	0.5385	0.0205	0.0992	15.2097	2.8416	0.0827	100.165	74.3735
XAL110	PLAG 25	48.0427	NA	32.4403	0.4767	-0.0401	0.0798	15.5327	2.6495	0.0657	99.2474	76.1204
XAL110	PLAG 25	48.4052	NA	31.7498	0.4944	0.0278	0.0663	15.3903	2.8006	0.0884	99.0228	74.8427
XAL110	PLAG 25	49.8222	NA	31.2031	0.4878	-0.0076	0.0638	14.6388	3.4057	0.0816	99.6954	70.0451
XAL110	PLAG 25	48.9877	NA	31.5544	0.5066	0.0145	0.1001	14.5923	2.9739	0.0947	98.8243	72.6458
XAL110	PLAG 25	48.2374	NA	32.2854	0.5583	-0.0082	0.0864	15.3527	2.6858	0.0845	99.2823	75.5793
XAL110	PLAG 25	48.4768	NA	31.9598	0.5209	0.012	0.0766	15.2026	2.8027	0.0785	99.1299	74.64
XAL110	PLAG 25	48.9534	NA	31.341	0.5534	-0.0196	0.1105	14.6255	3.1317	0.0998	98.7957	71.6533
XAL110	PLAG 25	51.9237	NA	30.247	0.6616	0.018	0.1123	12.9753	4.0693	0.153	100.16	63.2282
XAL110	PLAG 26	49.8903	NA	30.7412	0.6672	0.0038	0.0537	13.8212	3.7267	0.1457	99.0498	66.6451
XAL110	PLAG 26	48.618	NA	32.0765	0.4333	0.0555	0.0761	15.1184	2.9831	0.0574	99.4181	73.4439
XAL110	PLAG 26	50.9375	NA	30.5001	0.5005	0.0066	0.0676	13.2815	3.8131	0.1475	99.2545	65.2405
XAL110	PLAG 26	50.5743	NA	30.7355	0.5741	0.0502	0.0075	13.4792	3.6876	0.116	99.2244	66.4318
XAL110	PLAG 26	51.526	NA	29.6384	0.4951	0.0413	0.0648	12.6274	4.3221	0.1693	98.8843	61.1492
XAL110	PLAG 26	51.6344	NA	29.9946	0.4689	-0.0167	0.077	12.3925	4.4103	0.1766	99.1376	60.2055
XAL110	PLAG 26	49.8865	NA	31.3409	0.5536	-0.0328	0.0762	14.0196	3.4463	0.1302	99.4204	68.6867
XAL110	PLAG 26	49.6652	NA	31.3557	0.49	0.0167	0.0636	14.4097	3.1479	0.0992	99.2479	71.2489
XAL110	PLAG 26	49.8527	NA	31.3198	0.609	-0.029	0.0907	14.0555	3.4129	0.1054	99.4169	69.0447
XAL110	PLAG 26	51.4365	NA	30.0988	0.5628	0.0132	0.0829	12.8468	4.0297	0.2086	99.2794	63.0138
XAL110	PLAG 26	51.5001	NA	29.8839	0.4748	0.0205	0.0082	12.5308	4.3399	0.1656	98.9239	60.8833
XAL110	PLAG 26	52.0954	NA	29.4286	0.7752	0.0013	0.093	12.0424	4.3041	0.1595	98.8995	60.1484
XAL110	PLAG 26	50.9506	NA	30.1929	0.5886	0.0483	0.0797	12.9362	4.0315	0.1644	98.9922	63.3273
XAL110	PLAG 26	50.6168	NA	30.5538	0.4902	-0.0076	0.1104	13.3253	3.6912	0.1239	98.904	66.1227
XAL110	PLAG 26	50.2371	NA	30.7491	0.5014	0.0161	0.0786	13.5609	3.5849	0.1295	98.8575	67.1246
XAL110	PLAG 26	49.6119	NA	31.2619	0.5537	-0.0249	0.0868	14.25	3.3082	0.1237	99.1712	69.908
XAL110	PLAG 27	49.6522	NA	30.4392	0.5948	-0.0057	0.0649	14.2274	3.3979	0.1453	98.5161	69.2348
XAL110	PLAG 27	50.7881	NA	30.428	0.5296	-0.0328	0.0831	13.5525	3.6285	0.0972	99.0743	66.9772
XAL110	PLAG 27	51.8957	NA	29.652	0.4028	-0.0246	0.0702	12.3402	4.4968	0.1701	99.0032	59.6709
XAL110	PLAG 27	51.7645	NA	29.0762	0.4548	0.0369	0.0972	12.5016	4.6411	0.1691	98.7414	59.245
XAL110	PLAG 27	50.9461	NA	30.9724	0.5126	0.03	0.0711	13.2815	3.8256	0.1146	99.7539	65.2943
XAL110	PLAG 27	49.7523	NA	30.7898	0.5521	-0.0038	0.0757	13.7363	3.5321	0.1159	98.5502	67.7798
XAL110	PLAG 27	49.2293	NA	31.8557	0.5849	0.0009	0.063	14.5631	3.0713	0.0876	99.456	72.0045
XAL110	PLAG 27	49.356	NA	31.7267	0.5339	-0.0104	0.0491	15.0276	3.1819	0.1106	99.9753	71.8429
XAL110	PLAG 27	50.4212	NA	30.7909	0.4543	-0.0243	0.0741	13.8299	3.5946	0.105	99.2457	67.5956
XAL110	PLAG 27	49.5847	NA	31.2547	0.5624	0.0085	0.0871	14.2992	3.1813	0.0761	99.0541	70.9755
XAL110	PLAG 27	50.0713	NA	30.8835	0.4885	0.0205	0.0675	14.0703	3.562	0.128	99.2916	68.075
XAL110	PLAG 27	51.216	NA	30.6465	0.4972	-0.0006	0.0847	13.6413	3.7214	0.1495	99.956	66.3699
XAL110	PLAG 27	51.1748	NA	30.8246	0.5218	0.0129	0.1038	13.4194	3.7651	0.1213	99.9436	65.8551
XAL110	PLAG 27	48.9758	NA	31.5994	0.5528	-0.0278	0.0858	14.9871	3.0256	0.1122	99.3109	72.768
XAL110	PLAG 27	51.0962	NA	30.7698	0.5037	0.0527	0.0389	13.4675	3.9714	0.1287	100.029	64.7242
XAL110	PLAG 27	49.4475	NA	31.9042	0.5409	0.0407	0.0822	14.6537	3.0438	0.0837	99.7966	72.3235
XAL110	PLAG 27	50.6843	NA	31.0368	0.4924	-0.0022	0.0825	13.9162	3.6183	0.1145	99.943	67.5542
XAL110	PLAG 27	48.9089	NA	31.9882	0.6638	0.0214	0.0868	14.8966	2.9685	0.0975	99.6317	73.0779
XAL110	PLAG 27	50.3783	NA	31.1163	0.5432	0.0025	0.0591	13.429	3.5909	0.137	99.2565	66.8431
XAL110	PLAG 27	51.6448	NA	30.4698	0.5847	0.0174	0.1049	13.1338	3.9968	0.1306	100.083	63.9989
XAL110	PLAG 27	50.114	NA	32.0624	0.4624	0.0019	0.1002	14.1953	3.1949	0.1069	100.238	70.6092
XAL110	PLAG 27	51.9145	NA	29.9941	0.4927	0.017	0.0528	12.5746	4.3796	0.1683	99.5937	60.7451
XAL110	PLAG 27	52.0059	NA	29.7337	0.4908	-0.0331	0.0842	12.4758	4.4316	0.1819	99.3708	60.2347
XAL110	PLAG 27	52.7987	NA	29.2061	0.504	-0.0076	0.0907	11.8757	4.5334	0.183	99.184	58.5077
XAL110	PLAG 27	50.8001	NA	30.1276	0.4885	-0.0227	0.0788	13.1417	3.9763	0.146	98.7363	64.0707
XAL110	PLAG 28	53.2066	NA	28.6897	0.7036	-0.023	0.1181	11.2007	4.853	0.2859	99.0346	55.1129
XAL110	PLAG 28	53.2232	NA	28.7459	0.7381	0.0022	0.1133	11.5138	4.66	0.2762	99.2727	56.7866
XAL110	PLAG 28	51.7094	NA	29.4368	0.6136	0.0246	0.0865	12.7084	4.2001	0.1767	98.956	61.9335
XAL110	PLAG 28	50.8977	NA	30.2844	0.6769	-0.0161	0.112	12.9627	4.0282	0.1493	99.0952	63.4493
XAL110	PLAG 28	52.1482	NA	29.6299	0.6177	0.0436	0.1148	12.4725	4.2731	0.1711	99.4708	61.1128
XAL110	PLAG 28	50.2943	NA	31.0598	0.4796	0.0325	0.0472	14.2778	3.5093	0.1001	99.8006	68.8172
XAL110	PLAG 28	52.3464	NA	29.4712	0.5608	-0.0199	0.0553	12.1332	4.5238	0.1807	99.2515	59.0862
XAL110	PLAG 28	51.6947	NA	29.5375	0.5039	-0.0309	0.0687	12.4436	4.2966	0.1572	98.6712	60.9799
XAL110	PLAG 28	52.0332	NA	29.8448	0.4707	-0.0076	0.0611	12.6306	4.1964	0.1542	99.3835	61.8901
XAL110	PLAG 28	50.5606	NA	30.7271	0.5471	0.0641	0.0603	13.3601	3.5704	0.1356	99.0253	66.8586
XAL110	PLAG 28	55.8546	NA	27.016	0.7177	-0.0066	0.0704	9.3989	5.8062	0.3731	99.2303	46.1855
XAL110	PLAG 28	50.311	NA	30.9951	0.6628	-0.0205	0.0492	13.6844	3.5691	0.1657	99.4168	67.2768
XAL110	PLAG 28	50.368	NA	31.1854	0.7614	0.0325	0.0564	14.241	3.4009	0.1246	100.17	69.3206
XAL110	PLAG 29	51.1121	NA	30.5079	0.398	-0.0227	-0.0035	13.2471	3.9444	0.1693	99.3526	64.3488
XAL110	PLAG 29	51.2405	NA	30.4294	0.3596	-0.0309	0.0634	12.9247	3.8215	0.1511	98.9593	64.5581
XAL110	PLAG 29	50.2577	NA	30.6437	0.3743	0.0537	0.0546	13.2797	3.8852	0.1923	98.7412	64.6548
XAL110	PLAG 29	51.1767	NA	30.519	0.4159	0.0069	0.0419	13.3999	3.973	0.178	99.7114	64.4177
XAL110	PLAG 29	50.9299	NA	31.1949	0.3963	0.0871	0.0368	13.0579	3.91	0.1697	99.7825	64.2119
XAL110	PLAG 29	50.5331	NA	30.6402	0.4135	0.0271	0.0397	13.2148	4.0768	0.1966	99.1418	63.4522
XAL110	PLAG 29	51.3347	NA	30.546	0.3895	0.0047	0.0421	13.5074	3.8972	0.1784	99.9001	65.026
XAL110	PLAG 29	51.4692	NA	30.5133	0.362	-0.0417	0.0229	12.7658	3.8283	0.1907	99.1104	64.0838
XAL110	PLAG 29	51.0956	NA	30.6499	0.4119	0.011	0.0647	13.0451	3.8499	0.1859	99.3141	64.4736
XAL110	PLAG 29	51.4446	NA	30.6735	0.4378	0.0032	0.034	13.1443	4.0516	0.1802	99.9691	63.5273
XAL110	PLAG 29	51.5939	NA	30.2295	0.5868	0.0136	0.0858	12.7198	3.9933	0.2071	99.4298	62.9919
XAL110	PLAG 29	54.556	NA	28.3036	0.4714	-0.0133	0.0766	10.4161	5.5916	0.2959	99.6979	49.8685
XAL110	PLAG 29	51.2496	NA	31.1045	0.4179	0.012	0.0477	12.9893	3.7383	0.1719	99.7311	65.08
XAL110	PLAG 29	51.2979	NA	30.7906	0.3672	0.0287	0.0522	13.283	3.6933	0.2005	99.7134	65.7398
XAL110	PLAG 29	51.2531	NA	30.5424	0.4635	0.0158	0.0311	13.2683	3.8171	0.1535	99.5448	65.1734
XAL110	PLAG 29	51.3995	NA	30.5329	0.4446	-0.0123	0.0626	13.2041	3.9404	0.1369	99.7087	64.4175
XAL110	PLAG 30	52.0466	NA	29.4489	0.7428	0.0082	0.1062	12.3094	4.2566	0.1979	99.1165	60.7936
XAL110	PLAG 30	50.7837	NA	30.333	0.5036	0.0145	0.0982	12.8199	3.9252	0.1616	98.6397	63.7314
XAL110	PLAG 30	51.2972	NA	30.2464	0.5476	0.0647	0.0707	13.0624	3.8674	0.1342	99.2905	64.5991
XAL110	PLAG 30	51.5978	NA	29.786	0.6133	-0.0685	0.0655	12.9273	4.1345	0.1391	99.195	62.8305
XAL110	PLAG 30	51.9357	NA	30.0414	0.4775	0.0107	0.0793	12.5411	4.283	0.1309	99.4996	61.333
XAL110	PLAG 30	51.4135	NA	29.9336	0.6194	0.0167	0.0635	12.7638	4.1575	0.248	99.216	62.0121
XAL110	PLAG 30	50.7694	NA	30.2761	0.5065	0.0202	0.1368	12.9183	3.9911	0.1696	98.788	63.5037
XAL110	PLAG 30	52.856	NA	29.3947	0.3638	0.0322	0.0415	11.6491	4.9217	0.2626	99.5216	55.8225
XAL110	PLAG 30	53.168	NA	29.1747	0.3873	0.0309	0.0646	11.716	4.9404	0.2338	99.7158	55.9643
XAL110	PLAG 30	52.4957	NA	28.9495	0.3942	-0.0155	0.0805	12.024	4.7442	0.2168	98.8894	57.6206
XAL110	PLAG 30	53.4962	NA	29.3417	0.4056	0.0167	0.0607	11.6382	4.5781	0.2234	99.7606	57.6466
XAL110	PLAG 30	54.4447	NA	28.6263	0.3744	0.0335	0.0662	11.2098	5.1296	0.2343	100.119	53.9676
XAL110	PLAG 30	51.6062	NA	29.9501	0.4992	0.0069	0.0731	12.7191	4.1123	0.1544	99.1213	62.5187
XAL110	PLAG 31	52.5409	NA	29.4571	0.8127	0.0205	0.124	12.152	4.3003	0.241	99.6486	60.0964
XAL110	PLAG 31	50.2413	NA	30.8252	0.5775	0.0151	0.055	14.1503	3.3091	0.1428	99.3163	69.6768
XAL110	PLAG 31	49.3232	NA	31.663	0.5844	0.0019	0.055	14.3902	3.1809	0.1135	99.3121	70.9522
XAL110	PLAG 31	51.0665	NA	30.5613	0.519	-0.0243	0.0671	13.1209	3.9854	0.1306	99.4265	64.0408
XAL110	PLAG 31	51.381	NA	30.4575	0.4511	-0.0253	0.0852	12.9464	3.9665	0.1265	99.3888	63.8539
XAL110	PLAG 31	51.1645	NA	30.2579	0.4861	-0.0123	0.0762	13.101	3.9635	0.1321	99.1689	64.1242
XAL110	PLAG 31	50.4913	NA	30.4955	0.4757	-0.0186	0.0929	13.0562	3.9426	0.1494	98.685	64.0987
XAL110	PLAG 31	49.442	NA	31.6326	0.5454	-0.0177	0.0806	14.1754	3.2864	0.1176	99.2624	69.9586
XAL110	PLAG 31	51.3103	NA	29.8499	0.5758	0.0328	0.0573	12.7046	4.0735	0.157	98.7613	62.6987
XAL110	PLAG 31	51.138	NA	30.4308	0.4246	0.0139	0.0589	12.7785	4.0675	0.1611	99.0732	62.8524
XAL110	PLAG 31	51.5057	NA	30.2398	0.4382	0.0114	0.0458	13.3872	3.8706	0.1383	99.6368	65.124
XAL110	PLAG 31	51.1695	NA	30.2359	0.4508	-0.0047	0.0743	12.9472	4.1418	0.1361	99.1509	62.8369
XAL110	PLAG 31	51.5605	NA	30.3597	0.6177	0.0341	0.0801	13.2149	3.8727	0.1033	99.843	64.9508
XAL110	PLAG 31	49.8202	NA	31.4535	0.5998	0.0129	0.054	14.5043	3.3383	0.118	99.9011	70.1169
XAL110	PLAG 31	51.1921	NA	30.4597	0.4712	0.0133	0.0749	13.507	3.8364	0.1456	99.7	65.4961
XAL110	PLAG 31	49.6122	NA	31.3635	0.5315	0.0006	0.0814	14.6704	3.171	0.1173	99.548	71.3946
XAL110	PLAG 31	53.2189	NA	28.7076	0.703	0.0022	0.0951	11.5288	4.7495	0.2676	99.2728	56.3974
XAL110	PLAG 32	51.0038	NA	30.7557	0.6039	0.006	0.1112	13.6882	3.6221	0.134	99.925	67.0901
XAL110	PLAG 32	50.4896	NA	31.3143	0.5317	0.0521	0.0487	13.557	3.5602	0.1057	99.6593	67.3623
XAL110	PLAG 32	48.5256	NA	32.4838	0.4545	-0.0155	0.0662	15.4026	2.6367	0.0795	99.6335	75.9929
XAL110	PLAG 32	49.8892	NA	31.5505	0.5469	-0.0322	0.0573	14.3355	3.3446	0.101	99.793	69.9013
XAL110	PLAG 32	49.985	NA	31.249	0.4946	-0.0088	0.0573	13.8186	3.3484	0.1082	99.0524	69.0688
XAL110	PLAG 32	49.4233	NA	31.6709	0.5536	-0.0319	0.0826	14.0094	3.1575	0.0813	98.9468	70.6829
XAL110	PLAG 32	50.741	NA	30.5656	0.4538	0.005	0.0853	13.4493	3.8209	0.1082	99.2293	65.63
XAL110	PLAG 32	48.4888	NA	32.2213	0.4897	0.0338	0.0728	15.3473	2.7997	0.0986	99.5519	74.7507
XAL110	PLAG 32	49.3235	NA	31.4849	0.4353	-0.0088	0.1062	14.4201	3.1373	0.0903	98.9888	71.3687
XAL110	PLAG 32	51.2699	NA	30.3021	0.5583	0.0366	0.1177	13.3206	3.8582	0.1092	99.5725	65.1925
XAL110	PLAG 32	51.3173	NA	30.4136	0.4464	0.0136	0.1018	13.3792	3.8064	0.1104	99.5887	65.5876
XAL110	PLAG 32	50.7394	NA	30.2693	0.4613	-0.0148	0.1135	13.0265	3.7992	0.161	98.5553	64.83
XAL110	PLAG 32	51.2093	NA	30.2634	0.5443	0.0082	0.1221	13.1664	3.9518	0.146	99.4114	64.2527
XAL110	PLAG 32	50.8843	NA	30.8326	0.4466	-0.0142	0.0932	13.6327	3.7021	0.1288	99.706	66.5482
XAL110	PLAG 32	50.1932	NA	30.8987	0.4267	0.0278	0.1111	13.679	3.6406	0.1029	99.0799	67.0883
XAL110	PLAG 32	49.3695	NA	32.1783	0.5249	0.0334	0.0394	14.9036	2.8471	0.0786	99.9749	73.9654
XAL110	PLAG 32	48.3892	NA	32.305	0.4641	0.0035	0.053	15.3988	2.7179	0.0535	99.3849	75.5549
XAL110	PLAG 32	50.2671	NA	31.6125	0.5321	0.0009	0.0748	14.2799	3.3352	0.111	100.213	69.8368
XAL110	PLAG 32	51.5164	NA	30.6172	0.6087	-0.0445	0.0953	13.0521	4.0008	0.1394	99.9855	63.7993
XAL110	PLAG 32	49.8889	NA	30.9853	0.5345	0.0054	0.0695	13.98	3.4852	0.1291	99.0778	68.3938
XAL110	PLAG 32	49.3054	NA	32.1216	0.6144	0.0476	0.0749	14.9091	3.063	0.1363	100.272	72.3243
XAL110	PLAG 33	51.0238	NA	29.9255	0.6776	0.0006	0.1096	13.6178	3.792	0.1214	99.2683	66.0277
XAL110	PLAG 33	50.1953	NA	31.1133	0.6364	0.0199	0.0729	13.8647	3.4501	0.1453	99.4978	68.3629
XAL110	PLAG 33	52.6851	NA	29.7262	0.5166	0.029	0.0566	12.3758	4.3229	0.2169	99.9291	60.497
XAL110	PLAG 33	54.6503	NA	27.4552	0.8902	0.0145	0.1951	10.4749	5.2975	0.4872	99.4649	50.7468
XAL110	PLAG 33	51.0419	NA	30.5498	0.6395	0.0331	0.0491	13.7484	3.7457	0.216	100.024	66.1489
XAL110	PLAG 33	53.9992	NA	28.8031	0.3947	0.0092	0.0508	11.3178	4.8431	0.2716	99.6895	55.4648
XAL110	PLAG 33	51.2915	NA	30.4052	0.6329	-0.0189	0.0963	13.5085	3.84	0.17	99.9253	65.3855
XAL110	PLAG 33	51.9679	NA	29.4705	0.714	0.011	0.0637	12.0912	4.2987	0.2485	98.8657	59.9581
XAL110	PLAG 33	54.191	NA	27.9049	0.5659	-0.0032	0.0764	10.6598	5.4066	0.3067	99.1083	51.227
XAL110	PLAG 33	50.8348	NA	30.4895	0.5653	0.0215	0.097	13.7741	3.7534	0.1465	99.6821	66.4103
XAL110	PLAG 34	51.4937	NA	30.1733	0.611	0.0205	0.0908	12.7248	4.0598	0.159	99.3329	62.8051
XAL110	PLAG 34	51.8167	NA	30.6436	0.5496	0.0575	0.1028	12.9981	4.1283	0.1251	100.421	63.0429
XAL110	PLAG 34	51.5766	NA	29.9916	0.486	0.0079	0.0702	12.814	4.1946	0.1574	99.2982	62.2273
XAL110	PLAG 34	50.5383	NA	30.6277	0.6175	0.006	0.0854	13.4887	3.8499	0.1306	99.344	65.4445
XAL110	PLAG 34	50.8115	NA	30.4106	0.4584	0.0069	0.1068	13.4153	3.8701	0.1293	99.2089	65.2092
XAL110	PLAG 34	53.2862	NA	29.0197	0.4477	0.0303	0.0697	11.3522	5.0103	0.1879	99.404	54.9946
XAL110	PLAG 34	52.9959	NA	28.9698	0.4996	-0.0253	0.1596	11.6957	4.9446	0.2486	99.4885	55.8544
XAL110	PLAG 34	52.6415	NA	29.0033	0.4053	0.0107	0.0418	11.5375	4.8275	0.2229	98.6906	56.1744
XAL110	PLAG 34	51.6291	NA	30.01	0.4313	-0.0268	0.0938	13.038	4.1494	0.1526	99.4774	62.8988
XAL110	PLAG 34	52.8645	NA	29.4014	0.3903	0.0253	0.0534	11.8321	4.7276	0.1866	99.4812	57.4102
XAL110	PLAG 34	54.3855	NA	28.4101	0.3836	0.0022	0.0256	11.0579	5.2262	0.2256	99.7166	53.2043
XAL110	PLAG 34	52.0638	NA	29.2646	0.6979	-0.0041	0.08	12.3143	4.4233	0.2515	99.0914	59.7248
XAL110	PLAG 34	52.5731	NA	29.351	0.4273	0.0171	0.1457	11.602	4.7555	0.1936	99.0651	56.7669
XAL110	PLAG 34	52.3299	NA	29.9632	0.3296	0.0395	0.0477	12.4282	4.4319	0.1659	99.7357	60.198
XAL110	PLAG 34	52.3022	NA	29.4238	0.375	-0.0073	0.0511	12.1892	4.5122	0.2138	99.0599	59.1446
XAL110	PLAG 34	52.9711	NA	28.8809	0.3545	-0.0158	0.0483	11.341	4.831	0.1693	98.5803	55.9088
XAL110	PLAG 34	53.3462	NA	28.3624	0.4558	-0.0054	0.0467	11.3286	4.8179	0.1825	98.5346	55.9042
XAL110	PLAG 34	51.6318	NA	30.3754	0.5063	0.0073	0.0918	12.8116	4.2432	0.1852	99.8525	61.8595
XAL110	PLAG 34	54.3723	NA	28.4022	0.3762	0.06	0.0572	10.9243	5.1972	0.2114	99.6007	53.08
XAL110	PLAG 34	54.0144	NA	28.2397	0.3986	0.007	0.0542	11.1243	4.9832	0.1796	99.0011	54.6488
XAL110	PLAG 34	51.5718	NA	30.5273	0.4665	-0.0559	0.0705	13.0377	4.0425	0.1266	99.7869	63.5863
XAL110	PLAG 34	52.0914	NA	29.8397	0.4737	-0.0167	0.0822	12.6021	4.2272	0.1331	99.4326	61.7449
XAL110	PLAG 34	51.4921	NA	30.0213	0.5459	-0.018	0.0844	12.8806	4.0952	0.138	99.2395	62.9683
XAL110	PLAG 35	52.3437	NA	29.2729	0.5347	0.0338	0.0319	12.4137	4.5784	0.1604	99.3694	59.4246
XAL110	PLAG 35	51.7462	NA	29.4551	0.4539	-0.0152	0.1063	12.6268	4.5444	0.1584	99.076	60.0159
XAL110	PLAG 35	49.864	NA	31.4963	0.3788	-0.0041	0.0572	14.2479	3.2361	0.106	99.3822	70.4297
XAL110	PLAG 35	51.6536	NA	30.2155	0.5454	-0.0098	0.0675	12.6492	4.3201	0.168	99.6093	61.2045
XAL110	PLAG 35	49.2701	NA	31.7068	0.6174	-0.0038	0.0794	14.6032	3.225	0.0879	99.5859	71.0827
XAL110	PLAG 35	49.3457	NA	31.8218	0.4618	0.0151	0.0495	14.5554	3.1426	0.0872	99.4791	71.5386
XAL110	PLAG 35	51.4861	NA	30.4575	0.688	0.0398	0.0872	13.0477	3.9427	0.1648	99.9137	64.0257
XAL110	PLAG 35	57.9741	NA	25.2945	0.8426	-0.0051	0.1577	7.5258	6.6718	0.6687	99.13	36.899
XAL110	PLAG 35	50.4877	NA	30.9248	0.6502	0.0013	0.093	13.784	3.4319	0.1365	99.5094	68.3824
XAL110	PLAG 35	51.6868	NA	29.4997	0.6286	0.0009	0.1023	12.67	4.2905	0.1773	99.0562	61.3686
XAL110	PLAG 35	49.7759	NA	31.4336	0.6088	0.0117	0.0594	14.69	3.1631	0.0884	99.8309	71.5915
XAL110	PLAG 35	48.7603	NA	31.7652	0.4028	-0.0246	0.0454	14.7889	3.1617	0.0842	98.984	71.7533
XAL110	PLAG 35	50.059	NA	30.839	0.5323	-0.0189	0.0812	13.8966	3.7155	0.1331	99.2378	66.8789
XAL110	PLAG 35	50.2888	NA	30.611	0.502	-0.0126	0.0793	13.3287	3.7743	0.1516	98.723	65.532
XAL110	PLAG 35	50.387	NA	30.1198	0.6638	0.0117	0.0794	13.4452	3.8694	0.1467	98.723	65.1983
XAL110	PLAG 35	52.0647	NA	29.931	0.4093	0.0341	0.0673	12.5366	4.2963	0.1338	99.4731	61.2418
XAL110	PLAG 35	52.4381	NA	29.6387	0.5042	0.0423	0.082	12.3189	4.4551	0.1903	99.6696	59.7789
XAL110	PLAG 35	49.7365	NA	31.1104	0.4838	-0.0199	0.0551	13.927	3.6419	0.119	99.0537	67.4128
XAL110	PLAG 35	52.5404	NA	29.3348	0.5406	0.0584	0.0807	12.0943	4.5344	0.1784	99.3619	58.9612
XAL110	PLAG 35	51.1356	NA	30.7564	0.5611	0.0268	0.087	13.6049	3.7527	0.13	100.054	66.2019
XAL110	PLAG 35	49.3682	NA	31.6922	0.5651	0.0467	0.0895	14.6154	3.1344	0.1142	99.6256	71.5618
XAL110	PLAG 35	50.585	NA	30.0505	0.5321	-0.0252	0.1031	13.5124	3.7469	0.1703	98.6751	65.9279
XAL110	PLAG 35	50.1462	NA	30.6283	0.5192	0.0486	0.0726	14.1181	3.3691	0.1492	99.0513	69.2317
XAL110	PLAG 35	49.1378	NA	32.1962	0.545	-0.0174	0.0621	14.435	2.9779	0.1195	99.4562	72.2977
XAL110	PLAG 35	49.954	NA	31.0787	0.5172	0.0565	0.0945	13.8307	3.5781	0.1419	99.2514	67.5499
XAL110	PLAG 35	49.8435	NA	31.3167	0.594	-0.0325	0.0562	13.9763	3.3793	0.095	99.2285	69.1738
XAL110	PLAG 35	50.2989	NA	4.5177	13.2313	0.2719	10.0436	18.703	1.6342	0.2516	98.9522	85.1688
XAL110	PLAG 35	55.5223	NA	26.4867	0.6667	-0.0398	0.1025	9.4707	5.9555	0.4319	98.5965	45.6154
XAL110	PLAG 35	56.5794	NA	27.0912	0.634	0.0366	0.1017	9.0989	6.1408	0.4519	100.135	43.8514
XAL110	PLAG 35	56.6412	NA	25.7352	0.8992	0.024	0.1513	8.7098	6.3736	0.5098	99.044	41.7718
XAL110	PLAG 35	53.9837	NA	27.9482	0.7665	0.0174	0.0959	10.9574	5.2718	0.3174	99.3582	52.4901
XAL110	PLAG 35	57.8629	NA	25.4537	0.951	0.0104	0.1099	7.692	6.9982	0.6098	99.688	36.4858
XAL110	PLAG 36	50.3378	NA	30.8113	0.615	0.0151	0.1021	13.4085	3.5884	0.1746	99.0528	66.6758
XAL110	PLAG 36	52.053	NA	29.6622	0.5454	-0.0013	0.0947	12.0181	4.393	0.1651	98.9301	59.6002
XAL110	PLAG 36	52.1774	NA	29.2148	0.4638	-0.0073	0.0934	12.4027	4.4199	0.1571	98.9219	60.2423
XAL110	PLAG 36	52.3534	NA	29.5379	0.4486	-0.0066	0.0936	12.2998	4.4708	0.1713	99.3688	59.7248
XAL110	PLAG 36	51.6062	NA	29.6404	0.4886	-0.0069	0.1028	12.4841	4.3806	0.152	98.8477	60.625
XAL110	PLAG 36	50.8075	NA	30.2446	0.4685	0.0095	0.08	13.1033	3.9089	0.1556	98.7779	64.3512
XAL110	PLAG 36	51.0904	NA	30.3719	0.5826	0.0028	0.0421	13.5082	4.0097	0.1649	99.7725	64.4458
XAL110	PLAG 36	51.5752	NA	29.9749	0.3989	-0.0126	0.0736	12.8433	4.023	0.1747	99.0511	63.1697
XAL110	PLAG 36	50.793	NA	31.013	0.546	-0.0129	0.1279	13.5648	3.8019	0.1356	99.9692	65.8285
XAL110	PLAG 36	49.8579	NA	31.369	0.5523	0.0391	0.0796	14.1715	3.338	0.1118	99.5192	69.656
XAL110	PLAG 36	50.0599	NA	31.3575	0.543	-0.0369	0.0571	14.4051	3.3216	0.1028	99.8101	70.1375
XAL110	PLAG 36	52.132	NA	30.4935	0.4859	-0.0562	0.0637	12.3403	4.3529	0.1801	99.9921	60.3969
XAL110	PLAG 36	49.705	NA	29.5969	0.9505	0.0495	0.8068	14.1806	3.239	0.1467	98.6749	70.1431
XAL110	PLAG 36	52.5431	NA	29.2901	0.4821	0.0035	0.1095	12.4274	4.324	0.197	99.3768	60.6603
XAL110	PLAG 36	51.2245	NA	30.1686	0.4803	-0.0354	0.0878	12.755	4.0308	0.1465	98.8581	63.0693
XAL110	PLAG 36	49.1746	NA	31.7077	0.5085	0	0.0866	14.9204	2.9042	0.0809	99.3829	73.6005
XAL110	PLAG 36	49.588	NA	31.5658	0.516	0.048	0.0858	14.8351	2.9688	0.0662	99.6738	73.1278
XAL110	PLAG 36	48.3314	NA	31.9495	0.5095	-0.0193	0.0436	14.8483	2.8012	0.1076	98.5718	74.0732
XAL110	PLAG 36	50.7137	NA	30.876	0.4863	0.0155	0.0927	13.4797	3.6813	0.11	99.4552	66.4923
XAL110	PLAG 36	50.2905	NA	31.0223	0.7179	-0.0344	0.0765	14.4497	3.4987	0.1252	100.147	69.0371
XAL110	PLAG 36	51.9827	NA	29.5897	0.4843	-0.0148	0.1087	12.1937	4.3124	0.1673	98.824	60.3749
XAL110	PLAG 36	52.3016	NA	29.2813	0.497	-0.0085	0.044	12.3277	4.2926	0.1738	98.9096	60.7188
XAL110	PLAG 36	48.6919	NA	32.0826	0.5432	0.0114	0.0377	14.8885	2.9743	0.0673	99.2967	73.1584
XAL 116	PLAG 1	50.2723	0.0307	31.0797	0.2958	0.0025	0.1477	14.1083	3.5134	0.1022	99.5526	68.5274
XAL 116	PLAG 1	48.4229	0.005	31.8519	0.2499	-0.0224	0.1276	15.6303	2.5213	0.0864	98.8728	77.0131
XAL 116	PLAG 1	53.7542	0.1794	27.9208	1.0337	0.0275	0.1658	11.2965	4.8814	0.4127	99.672	54.7807
XAL 116	PLAG 1	48.1701	0.0367	33.2219	0.3114	0.03	0.1305	15.8645	2.452	0.0368	100.254	77.9758
XAL 116	PLAG 1	48.0865	0.0335	32.7015	0.2582	-0.0094	0.1716	15.5233	2.5117	0.089	99.3657	76.9457
XAL 116	PLAG 1	49.8953	0.0248	31.5891	0.3484	0.0094	0.1097	15.1137	2.9443	0.061	100.096	73.6734
XAL 116	PLAG 1	49.1847	-0.011	31.9696	0.3047	-0.0101	0.134	15.1068	2.914	0.0764	99.6691	73.7962
XAL 116	PLAG 1	48.7093	0.0349	32.5106	0.2983	-0.0007	0.1685	15.3695	2.6936	0.0606	99.8444	75.6524
XAL 116	PLAG 1	48.8358	0.0689	32.3788	0.2088	0.0503	0.1363	15.5061	2.6352	0.0804	99.9005	76.1202
XAL 116	PLAG 1	48.8713	0.045	32.7381	0.2997	-0.0297	0.149	15.3894	2.7385	0.0666	100.268	75.3482
XAL 116	PLAG 1	48.5278	0.0318	32.0076	0.2799	0.0496	0.1626	15.2435	2.7162	0.0886	99.1076	75.2232
XAL 116	PLAG 1	47.7045	0.0252	32.5315	0.2452	-0.0051	0.1125	15.9321	2.4484	0.0673	99.0616	77.9347
XAL 116	PLAG 1	48.6023	0.0102	32.1695	0.2722	-0.0163	0.1561	14.9144	2.7783	0.0861	98.9728	74.4055
XAL 116	PLAG 1	48.9566	0.0529	32.3339	0.3359	-0.0054	0.1807	15.295	2.92	0.0485	100.118	74.1144
XAL 116	PLAG 1	48.833	0.0196	32.3002	0.29	-0.0087	0.171	15.9538	2.5259	0.0619	100.147	77.4508
XAL 116	PLAG 1	49.0301	0.0458	32.2736	0.285	0.0105	0.1635	14.8653	2.8184	0.0849	99.5771	74.0803
XAL 116	PLAG 2	51.1713	0.0485	31.1681	0.5378	-0.0105	0.0655	13.8316	3.3653	0.2099	100.387	68.5707
XAL 116	PLAG 2	55.9908	0.0121	28.2229	0.1278	0	-0.0873	10.2567	5.6533	0.2238	100.4	49.421
XAL 116	PLAG 2	54.1556	0.0035	28.5109	0.1986	-0.0098	-0.0152	10.7754	5.1675	0.2305	99.0169	52.8174
XAL 116	PLAG 2	56.7298	0.0185	27.5108	0.1689	0.017	-0.0187	9.2191	6.1608	0.2721	100.078	44.5541
XAL 116	PLAG 2	52.4763	0.1516	28.8361	1.0359	0.0528	0.3932	11.9446	4.1872	0.5475	99.6251	59.208
XAL 116	PLAG 3	50.7552	0.1086	30.7677	0.6359	0.0094	0.1593	13.5975	3.5183	0.2158	99.7676	67.2436
XAL 116	PLAG 3	51.2533	0.1133	30.4639	0.5183	-0.0431	0.1455	13.4918	3.7706	0.2313	99.945	65.5238
XAL 116	PLAG 3	51.0248	0.067	30.5841	0.454	0.0014	0.0994	13.4908	3.6816	0.1978	99.6009	66.168
XAL 116	PLAG 3	50.4784	0.0965	30.8235	0.4153	0.0616	0.142	13.6334	3.4987	0.1765	99.3259	67.5749
XAL 116	PLAG 3	50.8591	0.0967	30.6569	0.5407	0.0199	0.1171	13.7925	3.7153	0.244	100.042	66.2896
XAL 116	PLAG 3	50.9777	0.1008	30.6809	0.464	0.0456	0.1062	13.5894	3.654	0.1837	99.8023	66.5482
XAL 116	PLAG 3	50.9912	0.051	30.5435	0.4684	0.0047	0.1626	14.1694	3.6432	0.2042	100.238	67.4554
XAL 116	PLAG 3	50.7716	0.0744	30.1483	0.3879	0.0326	0.1508	13.321	3.6963	0.2027	98.7856	65.7794
XAL 116	PLAG 3	50.328	0.1163	31.3651	0.493	0.0337	0.1311	14.1802	3.5104	0.1678	100.326	68.3962
XAL 116	PLAG 3	50.4079	0.1022	31.4373	0.4232	0.0025	0.106	14.3653	3.4162	0.1751	100.436	69.2116
XAL 116	PLAG 3	50.3278	0.052	31.2742	0.4244	-0.0583	0.1064	14.2752	3.4067	0.2074	100.016	69.0062
XAL 116	PLAG 3	50.8016	0.0895	30.2552	0.4299	0.0235	0.1764	13.7967	3.608	0.2055	99.3864	67.0697
XAL 116	PLAG 3	50.5591	0.1098	30.5506	0.5453	0.0036	0.1305	14.0053	3.4679	0.1851	99.5573	68.3151
XAL 116	PLAG 3	50.062	0.0823	30.6524	0.4348	0.0141	0.087	13.6656	3.4998	0.2032	98.7012	67.5149
XAL 116	PLAG 3	50.6751	0.0926	31.013	0.4587	0.0195	0.1478	13.7027	3.5736	0.1941	99.8771	67.1678
XAL 116	PLAG 4	49.0959	0.0554	31.8182	0.4049	0.0485	0.0823	14.9864	3.055	0.1215	99.668	72.5399
XAL 116	PLAG 4	46.602	-0.0102	33.4629	0.2602	-0.009	0.0628	16.709	1.8889	0.036	99.0025	82.8408
XAL 116	PLAG 4	47.6531	0.056	32.3574	0.388	0.0644	0.0699	15.6402	2.6823	0.1185	99.0298	75.7938
XAL 116	PLAG 4	47.5093	-0.0016	33.0464	0.1613	0.0033	0.0463	16.1623	2.2304	0.05	99.2077	79.7818
XAL 116	PLAG 4	47.6902	-0.0177	33.0161	0.2488	-0.0127	0.0367	16.0021	2.3404	0.0653	99.3692	78.769
XAL 116	PLAG 4	47.428	-0.0108	32.4831	0.3188	0.0362	0.0327	15.9224	2.3547	0.1325	98.6974	78.2763
XAL 116	PLAG 4	47.7088	0.0199	33.2384	0.2725	-0.038	0.0098	15.9444	2.408	0.0612	99.6251	78.255
XAL 116	PLAG 4	47.5781	0.0215	32.8532	0.2625	0.0583	0.0302	16.1944	2.3077	0.0713	99.3773	79.1692
XAL 116	PLAG 4	47.5062	0.0168	32.9391	0.2056	-0.0337	0.0281	16.1335	2.2519	0.1076	99.1549	79.3318
XAL 116	PLAG 4	47.0752	0.0642	30.9289	1.8967	0.03	1.2166	14.7886	2.4429	0.1552	98.5983	76.2526
XAL 116	PLAG 4	49.3905	0.0652	31.7792	0.4326	-0.0029	0.0355	14.3846	3.1292	0.5297	99.7436	69.5651
XAL 116	PLAG 5	50.8304	0.1078	30.6882	0.4983	-0.0409	0.1493	13.7545	3.3491	0.1753	99.5121	68.6896
XAL 116	PLAG 5	50.9449	0.1067	30.4177	0.3855	-0.0217	0.1311	13.6027	3.6556	0.1517	99.3741	66.6848
XAL 116	PLAG 5	49.768	0.0859	31.0287	0.4468	0.0503	0.1788	14.5858	3.2874	0.1606	99.5923	70.3742
XAL 116	PLAG 5	50.5694	0.1032	31.0298	0.4174	-0.0427	0.1813	13.7803	3.5709	0.1468	99.7563	67.494
XAL 116	PLAG 5	51.1685	0.0898	30.3984	0.504	0.0062	0.1964	14.0269	3.4337	0.1646	99.9885	68.6356
XAL 116	PLAG 5	50.8746	0.0944	31.1096	0.4512	-0.0076	0.1494	13.8218	3.6698	0.1628	100.326	66.9124
XAL 116	PLAG 5	50.0287	0.05	30.5978	0.4295	-0.0271	0.156	14.4742	3.3681	0.1493	99.2264	69.7652
XAL 116	PLAG 5	50.3963	0.1118	31.0234	0.4613	0.0181	0.1101	13.9581	3.6616	0.1666	99.9072	67.163
XAL 116	PLAG 5	49.5487	0.0945	31.0069	0.5746	0.0043	0.1507	13.755	3.312	0.1447	98.5912	69.0485
XAL 116	PLAG 5	49.7428	0.1074	31.0839	0.4642	-0.0235	0.1739	14.2562	3.2298	0.1167	99.1513	70.436
XAL 116	PLAG 5	49.9973	0.101	30.9916	0.4937	0.0138	0.1463	14.2716	3.3564	0.1388	99.5104	69.5806
XAL 116	PLAG 5	50.4307	0.085	30.7567	0.4732	0.0413	0.1542	13.7522	3.6994	0.1849	99.5776	66.5418
XAL 116	PLAG 2	56.4523	0.0391	26.9052	0.2956	0.0141	0.0246	8.7648	6.2499	0.5321	99.2777	42.325
XAL 116	PLAG 2	57.2302	0.0385	26.7732	0.1888	-0.0134	0.0354	8.7331	6.4517	0.3216	99.759	42.0042
XAL 116	PLAG 2	56.0794	0.0268	27.5012	0.1939	0.0047	0.0098	9.5429	6.0096	0.3176	99.686	45.8878
XAL 116	PLAG 2	52.6943	0.0071	29.8819	0.2132	0.0163	-0.0057	12.1628	4.5282	0.1354	99.6335	59.2772
XAL 116	PLAG 2	52.7726	-0.0111	29.7773	0.2536	-0.0029	-0.0015	12.2846	4.4389	0.2172	99.7287	59.7039
XAL 116	PLAG 2	51.9642	0.0601	30.0064	0.1621	0.0467	0.0353	12.7109	4.2059	0.1483	99.3399	62.0086
XAL 116	PLAG 2	53.2757	0.0442	29.3586	0.1844	0.0072	-0.01	11.726	5.0038	0.1797	99.7697	55.8517
XAL 116	PLAG 6	51.0443	0.0755	30.8614	0.4442	0.0043	0.1035	13.8132	3.4377	0.1925	99.9766	68.168
XAL 116	PLAG 6	50.6831	0.0882	30.5471	0.3394	0.0597	0.1174	13.9271	3.663	0.1845	99.6094	67.0364
XAL 116	PLAG 6	50.4347	0.09	30.3313	0.4149	0.0482	0.1239	13.6066	3.5426	0.1545	98.7467	67.3549
XAL 116	PLAG 6	49.6882	0.075	31.004	0.3875	-0.0355	0.1461	14.0583	3.4849	0.1938	99.0024	68.2591
XAL 116	PLAG 6	50.9045	0.0763	29.7912	0.445	-0.0181	0.1818	13.2836	3.7687	0.2116	98.6446	65.2577
XAL 116	PLAG 6	50.9701	0.0803	30.6907	0.465	0.0022	0.1353	13.9085	3.5697	0.1823	100.004	67.5651
XAL 116	PLAG 6	50.7477	0.0938	30.4606	0.4046	0.0337	0.1247	14.099	3.4567	0.199	99.6199	68.4712
XAL 116	PLAG 6	50.4589	0.0977	30.2226	0.3881	0.0583	0.1321	13.4605	3.6307	0.2018	98.6508	66.403
XAL 116	PLAG 6	50.1898	0.1416	30.2891	0.4171	-0.0112	0.0925	14.0052	3.619	0.2158	98.9588	67.2966
XAL 116	PLAG 7	50.6919	0.0803	30.6121	0.5032	0.0177	0.1659	14.0214	3.4851	0.2035	99.7811	68.163
XAL 116	PLAG 7	50.8735	0.0909	30.7207	0.4966	-0.0167	0.1145	13.7063	3.6399	0.2255	99.8512	66.6589
XAL 116	PLAG 7	50.9595	0.0736	31.0376	0.5628	0.0413	0.1605	13.4504	3.6318	0.2214	100.139	66.3033
XAL 116	PLAG 7	50.7891	0.0812	30.4666	0.4347	-0.0319	0.1351	13.9454	3.5938	0.1638	99.5777	67.5523
XAL 116	PLAG 7	51.4011	0.0843	30.4591	0.4004	-0.008	0.1463	13.7279	3.537	0.1991	99.9473	67.4072
XAL 116	PLAG 7	52.109	0.126	29.4451	0.4521	-0.0478	0.1257	12.6266	4.2558	0.2288	99.3214	61.2922
XAL 116	PLAG 7	51.7827	0.14	29.6485	0.4836	0.0246	0.1353	12.4056	4.2741	0.2421	99.1366	60.7265
XAL 116	PLAG 7	50.2599	0.0968	31.1513	0.3825	-0.029	0.1285	14.1241	3.3845	0.1902	99.6888	68.9815
XAL 116	PLAG 7	50.9256	0.102	30.3201	0.3981	0.0778	0.13	13.6503	3.599	0.1965	99.3993	66.9228
XAL 116	PLAG 7	51.0146	0.1131	30.2213	0.5333	-0.025	0.1085	13.2086	3.9716	0.2146	99.3605	63.96
XAL 116	PLAG 7	50.5905	0.067	30.4355	0.5942	0.0662	0.1986	13.3717	3.7172	0.1833	99.2242	65.8161
XAL 116	PLAG 8	51.0126	0.0806	29.9932	0.5622	0.0293	0.1364	13.444	3.8825	0.1974	99.3382	64.9314
XAL 116	PLAG 8	49.917	0.0863	30.828	0.393	-0.0007	0.1604	14.2224	3.3532	0.1529	99.1124	69.4707
XAL 116	PLAG 8	49.7832	0.1099	30.6917	0.4044	-0.0036	0.147	13.9983	3.3953	0.1688	98.6949	68.8088
XAL 116	PLAG 8	49.543	0.0673	31.5162	0.4492	-0.0163	0.133	14.0751	3.5212	0.1858	99.4746	68.0998
XAL 116	PLAG 8	49.3578	0.1183	30.9202	0.4342	0.029	0.1596	14.1021	3.3115	0.1612	98.5939	69.5145
XAL 116	PLAG 8	49.6129	0.1262	30.6354	0.4715	0.0014	0.1023	14.2272	3.3423	0.1187	98.638	69.6841
XAL 116	PLAG 8	49.7994	0.1007	30.3985	0.4492	0.0402	0.1434	14.2976	3.2436	0.1353	98.6078	70.3328
XAL 116	PLAG 8	51.2286	0.1007	29.8499	0.5056	0.0145	0.1554	13.4938	3.818	0.1814	99.3478	65.4434
XAL 116	PLAG 8	50.2305	0.0936	30.3023	0.4248	0.0304	0.1484	13.6896	3.6076	0.2062	98.7334	66.8979
XAL 116	PLAG 9	49.8163	0.0511	31.1032	0.2854	0.0127	0.146	14.2242	3.5293	0.1441	99.3123	68.4432
XAL 116	PLAG 9	49.7531	0.0273	31.215	0.2743	-0.0315	0.1632	13.9842	3.2683	0.0695	98.7234	69.9867
XAL 116	PLAG 9	49.6386	0.0471	31.3131	0.2915	0.0138	0.146	14.2645	3.2593	0.0684	99.0424	70.4625
XAL 116	PLAG 9	49.363	0.0214	31.5373	0.2963	-0.0174	0.1637	14.5235	3.1615	0.0631	99.1125	71.4747
XAL 116	PLAG 9	49.3036	0.023	31.6712	0.3432	0.0087	0.1236	14.7431	3.3397	0.106	99.6622	70.4969
XAL 116	PLAG 9	49.6463	0.0246	31.8444	0.2991	0.0083	0.1101	14.342	3.3395	0.0867	99.7011	70.0004
XAL 116	PLAG 10	50.0634	0.1097	30.9513	0.3428	0.0188	0.1496	13.8424	3.4678	0.1825	99.1283	68.0714
XAL 116	PLAG 10	50.5933	0.0966	30.6205	0.4318	-0.0185	0.1437	13.588	3.6518	0.2169	99.3242	66.4295
XAL 116	PLAG 10	51.1736	0.0789	30.8159	0.4564	0.0402	0.1535	13.6833	3.5768	0.1663	100.145	67.2268
XAL 116	PLAG 10	50.6428	0.0876	30.7136	0.4986	-0.0087	0.1335	13.9615	3.611	0.1624	99.8023	67.4814
XAL 116	PLAG 10	50.7506	0.0635	29.907	0.499	-0.0358	0.1739	13.7963	3.6761	0.1789	99.0095	66.7734
XAL 116	PLAG 10	50.1461	0.0446	30.8887	0.5176	-0.0069	0.2149	14.1587	3.3736	0.1674	99.5047	69.1922
XAL 116	PLAG 10	50.609	0.0601	30.6396	0.5158	-0.0409	0.1364	13.9201	3.5138	0.177	99.5308	67.9376
XAL 116	PLAG 10	50.9739	0.0672	30.188	0.5059	0.0105	0.1739	13.6929	3.5379	0.1657	99.3158	67.4773
XAL 116	PLAG 10	49.96	0.0711	30.903	0.4197	-0.0282	0.1431	14.083	3.5425	0.1581	99.2522	68.093
XAL 116	PLAG 10	50.4065	0.0927	30.7786	0.486	0.025	0.0773	13.9991	3.5577	0.2087	99.6315	67.6749
XAL 116	PLAG	49.9697	0.0197	30.809	0.4068	0.0641	0.1274	14.1478	3.4445	0.1219	99.1108	68.9255
XAL 116	PLAG	50.3992	0.1017	30.8699	0.4669	0.0094	0.1644	13.8362	3.4127	0.1447	99.4051	68.5497
XAL 116	PLAG	50.7451	0.0923	30.0512	0.4588	-0.0101	0.1708	13.6709	3.6634	0.1517	98.9941	66.7486
XAL 116	PLAG	50.2543	0.0953	30.7516	0.5568	0.0384	0.1362	14.0421	3.481	0.1583	99.514	68.3989
XAL 116	PLAG	49.1441	0.075	30.725	0.5478	0.0268	0.2636	14.2372	3.4287	0.1618	98.6099	68.998
XAL 116	PLAG	50.2864	0.1125	31.0561	0.4148	-0.0188	0.2789	13.9038	3.4638	0.1574	99.6547	68.2922
XAL 116	PLAG	50.6401	0.1293	30.7316	0.6501	0.0242	0.17	13.7591	3.4893	0.2291	99.8227	67.6258
XAL 116	PLAG	51.2653	0.1054	29.9872	0.4614	-0.0543	0.1409	13.145	3.7465	0.1995	98.9968	65.1963
XAL 116	PLAG	50.6569	0.108	31.0517	0.5326	-0.0051	0.1203	13.9104	3.461	0.1982	100.034	68.1561
XAL 116	PLAG	50.7673	0.0833	30.9048	0.4344	0.0293	0.0963	13.963	3.6932	0.1615	100.133	67.0048
XAL 116	PLAG	51.5536	0.0737	29.8406	0.5186	-0.0047	0.1687	13.1248	3.9386	0.2455	99.4593	63.8847
XAL 116	PLAG	50.6362	0.1195	30.9987	0.5056	-0.0018	0.1694	13.6878	3.4551	0.1613	99.7318	67.9898
XAL 116	PLAG	50.2082	0.0781	30.6502	0.4719	0.0409	0.1006	14.2985	3.3869	0.1738	99.4091	69.2942
XAL 116	PLAG	50.3689	0.1048	30.3811	0.5108	0.0355	0.1141	13.7031	3.6191	0.2363	99.0737	66.7347
XAL 116	PLAG	50.6833	0.0832	30.4715	0.424	0.0196	0.1189	13.6945	3.4785	0.1946	99.168	67.7245
XAL 116	PLAG	51.7799	0.1162	29.8119	0.5228	-0.0391	0.1349	12.9291	3.9262	0.2348	99.4168	63.6474
XAL 116	PLAG	55.9818	0.0309	27.2833	0.1741	0.0007	-0.0094	9.0942	6.0822	0.3281	98.9658	44.3808
XAL 116	PLAG	55.0802	0.0136	27.7031	0.2032	0.0355	-0.0138	9.6588	5.7892	0.2998	98.7696	47.1341
XAL 116	PLAG	56.3419	0.0781	26.7911	0.1815	0.0232	-0.0093	9.0394	6.348	0.3304	99.1242	43.2086
XAL 116	PLAG	57.7977	0.0236	26.0432	0.1351	-0.017	0.0076	7.9048	6.8778	0.4596	99.2324	37.8253
XAL 116	PLAG	56.2672	0.0219	26.662	0.0765	0.0377	-0.0012	8.7899	6.3379	0.4958	98.6877	42.1587
XAL 116	PLAG	55.8193	-0.0035	27.4797	0.1821	0.0058	0.0159	9.1811	6.0046	0.3117	98.9968	44.965
XAL 116	PLAG 14	50.4621	0.0854	30.5995	0.4793	-0.0333	0.1675	13.6663	3.5423	0.2117	99.1809	67.2262
XAL 116	PLAG 14	50.2427	0.0822	30.2766	0.6037	-0.0098	0.1643	13.6217	3.5092	0.2015	98.6922	67.3948
XAL 116	PLAG 14	49.8907	0.1053	30.9323	0.5743	0.0138	0.1353	13.6434	3.4581	0.1857	98.9388	67.8019
XAL 116	PLAG 14	49.3569	0.0692	31.2116	0.4958	0.0036	0.1493	14.0124	3.3938	0.1651	98.8579	68.8551
XAL 116	PLAG 14	49.4372	0.0672	31.1404	0.4323	-0.0246	0.168	14.483	3.221	0.1566	99.0811	70.655
XAL 116	PLAG 14	50.6716	0.0993	30.0643	0.5575	0.0398	0.1473	13.5054	3.6558	0.1968	98.9378	66.3475
XAL 116	PLAG 14	50.1228	0.1052	30.7783	0.6309	0.029	0.1195	13.7968	3.6727	0.2131	99.4683	66.662
XAL 116	PLAG 14	50.5084	0.0885	30.6224	0.5078	0.0025	0.0584	13.4639	3.7237	0.2007	99.1763	65.8663
XAL 116	PLAG 15	50.0062	0.0729	31.0123	0.4052	0.0163	0.1342	14.3082	3.3249	0.138	99.4182	69.8326
XAL 116	PLAG 15	50.227	0.0721	30.6282	0.3883	0.0159	0.154	13.7561	3.4248	0.1658	98.832	68.2648
XAL 116	PLAG 15	50.6519	0.0655	29.8027	0.5234	-0.0054	0.1257	13.4154	3.7069	0.2146	98.5007	65.8299
XAL 116	PLAG 15	49.3234	0.0965	31.7673	0.6209	-0.0185	0.1955	13.4359	3.4741	0.1804	99.0755	67.3899
XAL 116	PLAG 15	51.0251	0.1141	30.2978	0.5006	-0.0123	0.1201	13.572	3.7049	0.1814	99.5035	66.2291
XAL 116	PLAG 15	50.8603	0.083	30.575	0.4617	-0.0047	0.1299	13.7057	3.7656	0.2119	99.7883	65.9805
XAL 116	PLAG 15	50.7986	0.0884	31.0006	0.4519	0.0529	0.1063	13.8745	3.5558	0.2012	100.13	67.5201
XAL 116	PLAG 15	49.9682	0.1333	31.0334	0.5102	0.0033	0.0964	14.3264	3.3295	0.2039	99.6046	69.5646
XAL 116	PLAG 15	50.2945	0.0446	30.6082	0.4051	-0.0127	0.1483	13.7352	3.5494	0.2101	98.9826	67.3017
XAL 116	PLAG 16	50.5172	0.1117	30.4391	0.6364	-0.0438	0.1411	13.7251	3.6977	0.2109	99.4354	66.4081
XAL 116	PLAG 16	51.0804	0.082	30.4095	0.5553	-0.0029	0.132	13.6535	3.6312	0.2346	99.7754	66.5902
XAL 116	PLAG 16	50.3394	0.1008	30.8958	0.4543	0.0362	0.1371	13.9237	3.4677	0.2092	99.5643	68.0935
XAL 116	PLAG 16	50.8789	0.0566	30.5881	0.5351	0.0192	0.1385	13.8361	3.5689	0.209	99.8303	67.3504
XAL 116	PLAG 16	50.376	0.1108	30.2629	0.4912	0.0051	0.1057	13.6341	3.636	0.1889	98.8107	66.707
XAL 116	PLAG 16	50.9347	0.0928	30.8518	0.6036	0.0279	0.154	13.6766	3.7245	0.2119	100.278	66.1708
XAL 116	PLAG 16	50.8382	0.1135	29.6316	0.5943	0.0243	0.1564	13.2569	3.8245	0.2202	98.6599	64.8575
XAL 116	PLAG 16	47.2104	2.1948	24.4642	4.064	0.1089	0.887	13.0523	5.8291	0.9626	98.7732	52.7428
XAL 116	PLAG 17	51.3055	0.1254	30.5454	0.5771	-0.0181	0.151	13.2168	3.9797	0.2184	100.101	63.9159
XAL 116	PLAG 17	51.1018	0.1396	30.1844	0.5329	-0.0239	0.11	12.8804	4.1494	0.2269	99.3016	62.3466
XAL 116	PLAG 17	50.8634	0.0974	30.5066	0.4782	-0.0478	0.1105	13.8221	3.672	0.191	99.6935	66.7911
XAL 116	PLAG 17	49.8171	0.0134	31.0163	0.4858	0.0192	0.1311	13.8573	3.429	0.1986	98.9677	68.2663
XAL 116	PLAG 17	50.3707	0.096	30.4799	0.4357	0.0409	0.1655	13.7852	3.6529	0.2153	99.2421	66.7489
XAL 116	PLAG 17	50.4752	0.0789	30.3619	0.5062	0.0076	0.1017	13.8503	3.5586	0.1784	99.1188	67.5543
XAL 116	PLAG 17	50.5579	0.0816	30.3233	0.5379	0.0036	0.1691	13.7073	3.576	0.2122	99.1689	67.0908
XAL 116	PLAG 17	61.2935	0.3438	22.317	0.4257	0.0156	0.1264	4.8962	6.6972	4.0818	100.197	22.3813
XAL 116	PLAG 18	50.9071	0.075	29.8837	0.4566	0.0116	0.1841	13.4289	3.817	0.2236	98.9875	65.1804
XAL 116	PLAG 18	50.0572	0.1133	30.6123	0.4614	-0.0011	0.0928	13.6099	3.5713	0.2186	98.7357	66.9351
XAL 116	PLAG 18	50.6578	0.0836	30.0346	0.513	0.009	0.1398	13.6753	3.5569	0.2183	98.8883	67.1279
XAL 116	PLAG 18	49.8012	0.0873	30.7833	0.4791	0.008	0.176	14.1686	3.4187	0.1822	99.1043	68.873
XAL 116	PLAG 18	50.6805	0.1148	31.1219	0.4177	0.0033	0.1419	13.6354	3.6662	0.1965	99.9782	66.5021
XAL 116	PLAG 18	50.7592	0.1142	30.2388	0.3855	0.0333	0.2263	13.5472	3.4563	0.1666	98.9274	67.735
XAL 116	PLAG 19	50.0531	0.1123	31.0611	0.4493	-0.0282	0.1091	14.1151	3.3659	0.1836	99.4213	69.1074
XAL 116	PLAG 19	50.6085	0.0721	31.1855	0.3418	0.0127	0.1387	14.0666	3.4311	0.1829	100.04	68.6399
XAL 116	PLAG 19	50.04	0.0635	30.9509	0.3753	0.0051	0.1452	14.2109	3.3843	0.1806	99.3557	69.1522
XAL 116	PLAG 19	50.022	0.097	31.0161	0.4391	-0.0206	0.1609	13.8263	3.4339	0.2091	99.1838	68.1453
XAL 116	PLAG 19	50.3665	0.0801	30.5305	0.3947	-0.0033	0.1434	14.0406	3.3533	0.202	99.1078	68.998
XAL 116	PLAG 19	50.1246	0.0645	31.5657	0.4193	0.0583	0.126	13.6311	3.5221	0.1944	99.706	67.3596
XAL 116	PLAG 19	50.5648	0.0886	30.8767	0.4592	0.042	0.0974	13.2742	3.6996	0.2219	99.3244	65.606
XAL 116	PLAG 19	50.4881	0.0946	30.8343	0.5616	0.0051	0.1032	13.6489	3.5951	0.2376	99.5684	66.7838
XAL 116	PLAG 20	51.5439	0.0873	30.4422	0.5871	0.0387	0.1339	13.1013	3.787	0.2	99.9215	64.882
XAL 116	PLAG 20	50.9432	0.0818	30.1434	0.5767	0.0753	0.1122	13.1511	3.89	0.2272	99.2009	64.2731
XAL 116	PLAG 20	50.7788	0.103	30.0671	0.5847	-0.0036	0.1472	13.5664	3.7069	0.1851	99.1355	66.1945
XAL 116	PLAG 20	50.5897	0.1121	29.9752	0.4916	-0.0054	0.1575	13.5684	3.6204	0.2074	98.7168	66.6202
XAL 116	PLAG 20	49.9578	0.1161	30.4388	0.5522	-0.0253	0.128	13.5105	3.7247	0.1844	98.5871	66.0008
XAL 116	PLAG 20	50.7329	0.115	30.3781	0.531	-0.017	0.1096	13.4667	3.7865	0.1995	99.3023	65.5112
XAL 116	PLAG 20	50.9479	0.0589	30.3411	0.4573	-0.0163	0.1508	13.4305	3.7201	0.1927	99.2829	65.8621
XAL 116	PLAG 20	47.7486	0.0883	33.6801	0.5319	-0.0033	0.1404	13.1908	3.1882	0.1777	98.7428	68.8032
XAL 116	PLAG 20	50.4868	0.1019	30.958	0.4426	0.0123	0.093	13.899	3.5165	0.1743	99.6844	67.8994
XAL 116	PLAG 20	50.506	0.0671	30.5686	0.444	0.0177	0.1219	14.0017	3.503	0.1765	99.4065	68.1314
XAL 116	PLAG 21	49.2353	0.0598	31.0611	0.5134	-0.0145	0.1407	14.336	3.1949	0.1518	98.6784	70.6261
XAL 116	PLAG 21	46.8961	0.0292	33.0574	0.2924	0.0264	0.1623	16.02	2.1409	0.0954	98.72	80.0689
XAL 116	PLAG 21	47.1045	-0.0021	33.6231	0.2291	-0.0094	0.0244	16.525	2.1559	0.0693	99.7199	80.5744
XAL 116	PLAG 21	47.0961	0.0072	33.3704	0.2376	0.0351	0.024	16.4035	2.1301	0.098	99.402	80.5079
XAL 116	PLAG 21	47.2625	0.0078	33.0355	0.2234	0.0112	0.06	16.386	2.2993	0.0846	99.3702	79.3603
XAL 116	PLAG 21	46.4141	0.0311	33.4526	0.3016	0.0293	0.0138	16.4969	2.13	0.0903	98.9598	80.6348
XAL 116	PLAG 21	46.961	0.0453	32.885	0.2166	0.0159	0.0514	16.2374	2.103	0.0671	98.5828	80.6909
XAL 116	PLAG 21	50.2654	0.0748	30.5954	0.6085	-0.0235	0.1642	13.7818	3.4369	0.2067	99.1103	68.0675
XAL 116	PLAG 22	50.8918	0.0958	30.6328	0.5229	-0.0141	0.1609	13.4523	3.781	0.1858	99.7093	65.5698
XAL 116	PLAG 22	53.5419	0.3256	27.0335	1.3285	0.0257	0.5318	10.2082	4.4801	1.7499	99.2251	50.0427
XAL 116	PLAG 22	52.1119	0.1027	30.0314	0.5057	-0.0293	0.1179	12.8523	4.09	0.2316	100.014	62.6036
XAL 116	PLAG 22	50.4652	0.0953	31.0013	0.3729	-0.0167	0.1475	13.7168	3.5779	0.1923	99.5525	67.1723
XAL 116	PLAG 22	50.9277	0.0892	30.0508	0.477	0.0373	0.1902	13.3255	3.7755	0.2413	99.1144	65.1769
XAL 116	PLAG 22	50.5527	0.0919	30.7527	0.5665	-0.0442	0.1032	13.9608	3.5809	0.175	99.7397	67.6095
XAL 116	PLAG 22	49.8871	0.0861	31.0787	0.432	-0.0112	0.1217	13.7336	3.5203	0.2288	99.0771	67.3997
XAL 116	PLAG 23	50.365	0.1039	30.4542	0.4447	-0.0521	0.1488	13.6122	3.6466	0.1919	98.9151	66.5975
XAL 116	PLAG 23	49.5785	0.0886	31.1776	0.4241	0.0605	0.0983	14.263	3.2848	0.1713	99.1466	69.878
XAL 116	PLAG 23	49.3279	0.0774	31.4595	0.471	-0.0492	0.1593	14.1883	3.29	0.1486	99.0727	69.8279
XAL 116	PLAG 23	50.36	0.0933	30.8071	0.4542	-0.0014	0.1027	14.4124	3.3758	0.1476	99.7517	69.6347
XAL 116	PLAG 23	49.7941	0.0814	31.0429	0.577	0.0029	0.1401	14.4199	3.3736	0.1524	99.5844	69.6399
XAL 116	PLAG 24	51.6814	0.1104	30.1079	0.4176	-0.013	0.1617	12.4272	4.1398	0.21	99.2427	61.6171
XAL 116	PLAG 24	50.2098	0.0834	30.6913	0.6191	-0.0156	0.1862	13.7423	3.6169	0.1325	99.266	67.2154
XAL 116	PLAG 24	50.0809	0.0849	30.7474	0.4033	0.0007	0.1453	13.8849	3.3482	0.1546	98.8503	68.9832
XAL 116	PLAG 24	50.8182	0.075	30.1847	0.4501	-0.013	0.1597	13.6575	3.7081	0.1586	99.1989	66.4383
XAL 116	PLAG 24	49.961	0.076	30.8708	0.4732	0.0203	0.1205	14.2313	3.4237	0.1341	99.3108	69.1293
XAL 116	PLAG 24	49.9117	0.088	31.0003	0.5329	-0.0072	0.1038	14.3536	3.2135	0.1688	99.3654	70.4649
XAL 116	PLAG 24	50.281	0.0987	30.8896	0.5199	0.0351	0.146	13.9479	3.3513	0.1664	99.4359	69.0128
XAL 116	PLAG 24	50.8743	0.0889	30.5854	0.4887	0.0105	0.1375	13.8231	3.6792	0.2005	99.8881	66.7137
XAL 116	PLAG 24	50.4384	0.0999	30.4086	0.4714	-0.0007	0.153	13.7108	3.6558	0.1654	99.1026	66.8064
XAL 116	PLAG 24	49.4951	0.038	31.1814	0.4246	-0.0167	0.1327	14.3104	3.2173	0.1619	98.9447	70.4067
XAL 116	PLAG 24	50.8699	0.0974	30.5554	0.5037	0.0123	0.1331	13.6861	3.5581	0.175	99.5912	67.3088
XAL 116	PLAG 24	49.9985	0.0771	30.7212	0.5355	0.0004	0.136	14.0327	3.2427	0.1424	98.8865	69.9175
XAL 116	PLAG 24	50.2114	0.0733	30.8436	0.5084	-0.0221	0.1261	14.1891	3.5357	0.1663	99.6318	68.2651
XAL 116	PLAG 24	51.3354	0.1061	29.9413	0.5747	-0.0087	0.1103	12.4375	4.0838	0.2662	98.8465	61.7404
XAL 116	PLAG 25	49.6787	0.0565	31.4196	0.5177	-0.0297	0.1065	14.501	3.2099	0.1386	99.5989	70.8235
XAL 116	PLAG 25	50.2427	0.0883	30.8354	0.415	0.0304	0.119	14.3273	3.4656	0.1415	99.6652	68.99
XAL 116	PLAG 25	50.7094	0.1047	30.9968	0.5156	0.0413	0.148	13.9711	3.4086	0.1968	100.092	68.574
XAL 116	PLAG 25	49.8076	0.0918	30.8738	0.3828	0.0109	0.1488	14.2345	3.4081	0.1496	99.1079	69.1666
XAL 116	PLAG 25	49.9319	0.046	31.1524	0.4836	0.0119	0.1259	13.8676	3.3945	0.15	99.1637	68.689
XAL 116	PLAG 25	50.3884	0.0835	30.6905	0.4002	-0.0098	0.1122	14.0663	3.5636	0.1607	99.4556	67.9317
XAL 116	PLAG 25	50.1197	0.1022	31.0854	0.4222	0.0029	0.1142	13.7495	3.5903	0.1516	99.3381	67.3103
XAL 116	PLAG 25	50.6828	0.0837	30.2806	0.4644	0.0112	0.0948	13.5571	3.6264	0.1644	98.9654	66.7328
XAL 116	PLAG 25	51.3993	0.0757	30.5365	0.4245	-0.0435	0.1347	13.4639	3.7156	0.1762	99.8828	66.0072
XAL 116	PLAG 25	51.0897	0.0731	29.715	0.6584	-0.0347	0.127	13.2626	3.7423	0.2094	98.8426	65.3846
XAL 116	PLAG 26	50.9423	0.1069	30.7355	0.5359	0.0235	0.1445	13.8161	3.6091	0.1961	100.11	67.1319
XAL 116	PLAG 26	50.6489	0.0822	31.0045	0.3434	-0.0043	0.1723	13.9571	3.3896	0.1645	99.758	68.7991
XAL 116	PLAG 26	50.8265	0.0854	30.4247	0.5275	-0.0235	0.1502	13.2685	3.6476	0.2119	99.1188	65.941
XAL 116	PLAG 26	50.5869	0.0604	30.5481	0.5452	0.0326	0.1228	13.7888	3.548	0.2365	99.4693	67.2922
XAL 116	PLAG 26	50.0996	0.1631	31.0357	0.5355	-0.0014	0.0315	14.2022	3.3936	0.2299	99.6896	68.8858
XAL 116	PLAG 26	50.7869	0.076	30.33	0.4125	-0.0261	0.1652	13.4899	3.8086	0.234	99.2771	65.2931
XAL 116	PLAG 26	49.9904	0.0921	31.2547	0.3925	-0.0268	0.1229	13.9563	3.4335	0.1947	99.4103	68.4082
XAL 116	PLAG 26	51.2087	0.128	30.3724	0.5351	-0.0308	0.1421	13.2081	3.8301	0.2306	99.6242	64.7021
XAL 116	PLAG 26	50.0423	0.062	31.0919	0.4223	-0.0271	0.1222	14.0826	3.5857	0.1686	99.5505	67.7949
XAL 116	PLAG 27	50.2492	0.0715	30.8789	0.5409	0.0156	0.1443	14.0914	3.6485	0.1775	99.8176	67.4069
XAL 116	PLAG 27	50.3678	0.1019	30.8009	0.4739	0.0076	0.1536	13.682	3.7387	0.2121	99.5385	66.0957
XAL 116	PLAG 27	51.3407	0.1183	30.0003	0.5178	-0.038	0.1449	13.1562	3.9207	0.1978	99.3587	64.2184
XAL 116	PLAG 27	50.8417	0.0738	30.1198	0.5033	-0.0116	0.1006	13.3364	3.9085	0.2294	99.102	64.482
XAL 116	PLAG 27	51.1984	0.1163	30.1996	0.4915	0.0268	0.1605	13.1859	3.8278	0.2173	99.424	64.7267
XAL 116	PLAG 27	51.0172	0.0904	30.0333	0.4685	0.0492	0.1041	13.4311	3.8782	0.2307	99.3026	64.8094
XAL 116	PLAG 27	51.0783	0.0714	30.9808	0.5723	0.0011	0.126	13.4295	3.7737	0.2197	100.253	65.4461
XAL 116	PLAG 27	50.4138	0.0876	30.7977	0.4665	-0.0529	0.1225	13.7127	3.4026	0.1718	99.1224	68.3087
XAL 116	PLAG 27	50.0314	0.0851	30.3464	0.4856	0.0467	0.1281	13.9964	3.3388	0.1642	98.6227	69.1729
XAL 116	PLAG 27	50.6895	0.0809	30.5874	0.5079	-0.0134	0.147	13.6782	3.706	0.221	99.6044	66.2449
XAL 116	PLAG 27	51.2686	0.1065	30.7632	0.4761	0.021	0.129	13.3459	3.8118	0.2335	100.156	65.0332
XAL 116	PLAG 27	50.7351	0.0945	30.4229	0.5156	0.0717	0.1411	13.3785	3.6461	0.2314	99.2369	66.0598
XAL 116	PLAG 27	50.8416	0.0686	30.595	0.4813	0.0141	0.1253	13.6446	3.7198	0.1997	99.69	66.1922
XAL 116	PLAG 27	50.3492	0.1214	31.0524	0.4171	-0.0123	0.1366	14.1559	3.4057	0.1773	99.8033	68.9519
XAL 116	PLAG 27	50.7061	0.1075	30.8981	0.3953	-0.0391	0.1697	14.3226	3.4391	0.201	100.2	68.9069
XAL 116	PLAG 28	50.2724	0.1322	30.6427	0.5009	-0.0543	0.1454	13.8578	3.6007	0.1869	99.2846	67.2829
XAL 116	PLAG 28	50.7282	0.1097	30.7641	0.4303	-0.0098	0.1537	13.4473	3.5876	0.1901	99.4013	66.6833
XAL 116	PLAG 28	50.9641	0.0972	30.4776	0.469	-0.013	0.145	13.4754	3.6804	0.1584	99.454	66.3019
XAL 116	PLAG 28	50.6976	0.0981	30.4464	0.4759	-0.0243	0.1466	13.7868	3.6665	0.1989	99.4925	66.7363
XAL 116	PLAG 28	50.16	0.1029	30.7899	0.414	0.0094	0.1177	13.9813	3.511	0.1771	99.2634	68.05
XAL 116	PLAG 28	51.261	0.0824	30.6523	0.3877	-0.0395	0.1646	13.6869	3.5986	0.1927	99.9867	66.9989
XAL 116	PLAG 28	50.5423	0.0947	30.6323	0.4804	-0.0333	0.1667	13.1778	3.8011	0.2029	99.0649	64.9215
XAL 116	PLAG 28	51.4892	0.0749	29.7903	0.5382	0.0033	0.1776	13.2078	3.8559	0.23	99.367	64.5563
XAL 116	PLAG 29	51.9302	0.1144	29.9506	0.5966	-0.0217	0.181	13.0288	4.0229	0.2029	100.006	63.3991
XAL 116	PLAG 29	50.846	0.1223	30.4955	0.5424	0.0344	0.1686	13.4052	3.7434	0.1918	99.5496	65.6869
XAL 116	PLAG 29	49.7587	0.0984	30.5375	0.5308	0.0087	0.0933	13.7925	3.532	0.1895	98.5414	67.5777
XAL 116	PLAG 29	50.4594	0.0831	30.9095	0.4473	-0.0025	0.1572	14.4099	3.3568	0.1615	99.9821	69.6903
XAL 116	PLAG 29	49.7983	0.0672	30.7663	0.4646	-0.0054	0.1229	14.2932	3.3047	0.15	98.9618	69.8858
XAL 116	PLAG 29	50.5633	0.058	30.3537	0.4767	-0.0098	0.183	13.7159	3.7507	0.181	99.2725	66.2005
XAL 116	PLAG 29	49.9929	0.1113	31.2565	0.4031	0.0163	0.1069	14.1809	3.3729	0.1753	99.6161	69.1973
XAL 116	PLAG 30	50.951	0.098	30.8098	0.5915	0.0036	0.159	14.0307	3.6387	0.1555	100.438	67.4541
XAL 116	PLAG 30	49.9936	0.0562	30.7921	0.456	0.0101	0.1087	13.8059	3.6298	0.1859	99.0384	67.0323
XAL 116	PLAG 30	50.1004	0.0918	30.9731	0.4928	0.0029	0.0784	14.174	3.3885	0.1553	99.4571	69.1723
XAL 116	PLAG 30	50.6372	0.1258	30.4416	0.5477	-0.0156	0.1546	13.6205	3.6259	0.1736	99.3113	66.8037
XAL 116	PLAG 30	50.608	0.0805	30.5934	0.4667	0.0087	0.1781	13.6013	3.6456	0.185	99.3672	66.6118
XAL 116	PLAG 30	50.2144	0.1346	30.9592	0.4152	-0.0094	0.1296	14.002	3.4846	0.1391	99.4692	68.3916
XAL 116	PLAG 30	50.3873	0.0692	30.7936	0.4945	0.008	0.1445	13.5544	3.5855	0.1327	99.1698	67.0982
XAL 116	PLAG 30	51.081	0.1078	30.6417	0.4737	0.0362	0.1853	14.0083	3.4787	0.1716	100.184	68.3077
XAL 116	PLAG 30	50.3468	0.0403	30.5857	0.5258	-0.0572	0.1491	13.6995	3.5726	0.1721	99.0347	67.2553
XAL 116	PLAG 30	50.1251	0.0946	30.8477	0.4444	-0.0159	0.1477	13.9818	3.4211	0.1319	99.1784	68.7752
XAL 116	PLAG 31	49.6412	0.1218	30.6265	0.535	0.0159	0.1388	14.0831	3.702	0.195	99.0593	67.0166
XAL 116	PLAG 31	50.4922	0.0749	30.7718	0.5584	0.0235	0.158	13.666	3.5741	0.1869	99.5058	67.1342
XAL 116	PLAG 31	50.7038	0.0829	30.7986	0.5722	-0.0214	0.1581	13.7571	3.4794	0.2047	99.7354	67.7784
XAL 116	PLAG 31	50.9231	0.1172	30.2989	0.4514	-0.0272	0.161	13.5326	3.7623	0.2128	99.4321	65.71
XAL 116	PLAG 31	50.7226	0.0889	29.757	0.567	-0.063	0.1372	13.5311	3.8323	0.2187	98.7918	65.2841
XAL 116	PLAG 31	50.5811	0.1148	30.4471	0.5573	-0.0568	0.1623	13.6587	3.729	0.2366	99.4301	66.021
XAL 116	PLAG 31	49.9787	0.0841	31.0309	0.4975	0.0232	0.1597	13.9251	3.4539	0.2128	99.3658	68.1645
XAL 116	PLAG 31	50.3154	0.0912	30.5097	0.6234	0.0492	0.1253	13.5555	3.7045	0.2387	99.213	65.9839
XAL 116	PLAG 32	50.8519	0.1545	30.2868	0.7613	0.0499	0.1086	12.7597	3.9712	0.3144	99.2584	62.7923
XAL 116	PLAG 32	49.6394	0.1041	31.1795	0.5965	-0.0163	0.1424	14.0103	3.5054	0.1845	99.3458	68.0981
XAL 116	PLAG 32	49.6395	0.0998	31.0395	0.5007	-0.0333	0.152	13.8993	3.4757	0.2052	98.9783	68.0223
XAL 116	PLAG 32	49.9906	0.1019	30.4779	0.4781	0.0119	0.1444	14.0365	3.412	0.1973	98.8507	68.6512
XAL 116	PLAG 32	49.9369	0.0421	30.8715	0.4756	0.0174	0.1321	13.9641	3.4414	0.2147	99.0957	68.2927
XAL 116	PLAG 32	50.5158	0.0768	30.785	0.4593	-0.0706	0.1216	13.6978	3.7524	0.1837	99.5219	66.1507
XAL 116	PLAG 32	50.1265	0.112	31.0232	0.4319	0.0272	0.1445	14.1016	3.4451	0.1974	99.6094	68.5509
XAL 116	PLAG 33	50.8365	0.0861	30.0533	0.6307	0	0.1267	13.1682	3.8603	0.2071	98.9689	64.5486
XAL 116	PLAG 33	50.578	0.1106	30.2408	0.5105	0.0167	0.1419	13.7352	3.7117	0.1951	99.2404	66.4036
XAL 116	PLAG 33	50.3034	0.1382	30.388	0.3895	-0.0224	0.1211	13.7435	3.5608	0.2068	98.829	67.2595
XAL 116	PLAG 33	49.7198	0.096	30.6273	0.4144	0.067	0.1008	13.8193	3.5787	0.201	98.6243	67.2975
XAL 116	PLAG 33	49.7945	0.0792	31.3475	0.4894	0.0221	0.1165	13.6717	3.6091	0.1969	99.3268	66.8961
XAL 116	PLAG 33	50.2248	0.1159	30.5989	0.4496	0.008	0.1287	13.7126	3.5487	0.2078	98.995	67.2787
XAL 116	PLAG 34	50.989	0.1251	30.2843	0.397	-0.0543	0.1455	13.6514	3.6556	0.197	99.3905	66.5879
XAL 116	PLAG 34	50.4259	0.1031	30.3765	0.4786	-0.0058	0.1164	13.7165	3.6209	0.1826	99.0148	66.954
XAL 116	PLAG 34	50.4646	0.0593	30.5452	0.4079	-0.009	0.1602	13.4277	3.5461	0.1963	98.7983	66.8752
XAL 116	PLAG 34	50.7114	0.0751	31.0607	0.5208	-0.0366	0.1466	13.7136	3.4922	0.1988	99.8826	67.6544
XAL 116	PLAG 34	50.693	0.1024	30.6345	0.4275	-0.0072	0.1598	13.8114	3.6045	0.192	99.6178	67.1667
XAL 116	PLAG 34	50.8042	0.0715	30.8901	0.4473	0.017	0.1764	13.6026	3.7576	0.1765	99.9432	65.9923
XAL 116	PLAG 34	51.0451	0.094	30.2986	0.3754	-0.0282	0.1434	13.6174	3.8633	0.2054	99.6143	65.3011
XAL 116	PLAG 34	50.9995	0.1118	30.7419	0.4266	-0.0663	0.1237	13.5761	3.7236	0.2136	99.8505	66.0038
XAL 116	PLAG 34	51.2397	0.0774	30.5151	0.4638	-0.03	0.1502	13.2866	3.695	0.2025	99.6003	65.7281
XAL 116	PLAG 34	50.668	0.1016	30.3621	0.3779	-0.0319	0.1243	13.8917	3.7387	0.1746	99.407	66.5783
XAL 116	PLAG 34	50.3523	0.091	30.61	0.5498	0	0.1758	13.5296	3.6054	0.1764	99.0903	66.7669
XAL 116	PLAG 34	50.9681	0.1423	30.1537	0.5818	0.0373	0.1422	13.3922	3.7725	0.2539	99.444	65.259
XAL 116	PLAG 34	50.9497	0.1052	30.0423	0.4859	-0.042	0.1483	13.5249	3.7543	0.2276	99.1962	65.687
XAL 116	PLAG 34	50.1398	0.0785	30.8381	0.4176	0.0427	0.1305	14.1451	3.4197	0.1431	99.3551	68.9867
XAL 116	PLAG 34	51.4974	0.1187	29.6434	0.5773	-0.0072	0.1389	12.8573	3.995	0.2448	99.0655	63.0931
XAL 116	checkpoint	50.5643	0.0992	31.024	0.5523	0.0058	0.1282	14.0386	3.509	0.2085	100.13	68.0268
XAL 116	checkpoint	52.4422	0.1215	29.4344	0.7254	0.0134	0.169	12.4939	4.3218	0.3073	100.029	60.4135
XAL 116	checkpoint	52.1846	0.1468	29.4015	0.8068	-0.0286	0.064	12.4053	4.2746	0.3667	99.6217	60.2862
XAL 118A	PLAG 1	50.8719	0.0954	30.5077	0.4101	0	0.078	13.0258	3.8403	0.3373	99.1666	63.9238
XAL 118A	PLAG 1	51.06	0.0689	30.7505	0.316	0.0158	0.0839	13.1403	3.8753	0.291	99.6016	64.0999
XAL 118A	PLAG 1	51.9081	0.1005	30.1807	0.3459	-0.0231	0.181	12.9233	4.0721	0.3608	100.049	62.3661
XAL 118A	PLAG 1	51.1214	0.0799	30.5073	0.3745	-0.0085	0.0837	13.3393	3.9361	0.3099	99.7436	64.0361
XAL 118A	PLAG 1	50.9185	0.0949	30.4552	0.2151	0.0231	0.0383	12.8827	3.9247	0.3059	98.8583	63.3086
XAL 118A	PLAG 1	50.6674	0.0907	30.5912	0.2547	0.0176	0.079	13.4116	3.9253	0.3814	99.4188	63.959
XAL 118A	PLAG 1	50.6922	0.106	30.432	0.2886	0.0231	0.0565	13.4527	3.916	0.335	99.3022	64.2501
XAL 118A	PLAG 1	51.1151	0.1187	30.7882	0.3903	-0.0334	0.0726	13.4201	3.8361	0.3267	100.034	64.672
XAL 118A	PLAG 1	49.8959	0.0701	30.7897	0.3581	-0.0224	0.064	13.6371	3.6571	0.2527	98.7022	66.3406
XAL 118A	PLAG 1	49.6147	0.0939	30.6981	0.3704	0.0029	0.0464	13.8297	3.6609	0.3199	98.6368	66.3766
XAL 118A	PLAG 1	49.9333	0.099	30.8935	0.3533	0.029	0.0948	13.7743	3.6989	0.3052	99.1813	66.1226
XAL 118A	PLAG 1	50.3533	0.0926	30.6397	0.3153	0.0224	0.0772	14.0191	3.6782	0.3072	99.5049	66.6268
XAL 118A	PLAG 1	50.806	0.0914	31.2969	0.3408	-0.011	0.0658	13.7638	3.6596	0.2465	100.26	66.5569
XAL 118A	PLAG 1	51.455	0.0933	30.3719	0.346	0.0276	0.0915	13.315	4.0537	0.3162	100.07	63.3225
XAL 118A	PLAG 1	51.1791	0.0768	30.3881	0.3132	0.022	0.1098	13.42	3.8334	0.3267	99.6692	64.6876
XAL 118A	PLAG 1	50.8424	0.1079	30.383	0.267	-0.0129	0.0968	13.2509	3.7988	0.3015	99.0356	64.6881
XAL 118A	PLAG 1	50.3102	0.075	30.8208	0.3306	0.0198	0.0842	13.2197	3.8146	0.3457	99.0206	64.3788
XAL 118A	PLAG 1	50.9196	0.0849	30.7072	0.3135	-0.0393	0.1066	13.3325	3.8989	0.2929	99.6167	64.2938
XAL 118A	PLAG 1	50.3336	0.1011	30.7242	0.3235	0.0081	0.0757	13.8397	3.7016	0.2168	99.3244	66.5484
XAL 118A	PLAG 2	51.4215	0.0651	29.9848	0.3044	-0.0327	0.0724	12.8095	3.8988	0.2849	98.8088	63.4015
XAL 118A	PLAG 2	50.9532	0.0891	29.9728	0.3414	0.0022	0.1226	12.9175	3.8929	0.3565	98.6481	63.3629
XAL 118A	PLAG 2	51.0197	0.0913	30.1991	0.2961	0.0081	0.0964	13.0734	3.8025	0.3311	98.9177	64.2463
XAL 118A	PLAG 2	50.7451	0.0903	30.4222	0.2812	0.0151	0.1097	13.1883	3.8975	0.3289	99.0784	63.9182
XAL 118A	PLAG 2	50.7057	0.0815	30.5699	0.3011	-0.0011	-0.0086	13.062	3.9288	0.3712	99.0104	63.3661
XAL 118A	PLAG 2	50.7093	0.0854	30.1498	0.3417	-0.0246	0.0953	13.1979	3.9182	0.3289	98.8019	63.8202
XAL 118A	PLAG 2	51.3414	0.1036	30.0455	0.304	0.0132	0.0921	12.9413	3.8736	0.2743	98.9888	63.8207
XAL 118A	PLAG 2	50.8821	0.1169	30.2809	0.2619	0.0592	0.0844	13.244	3.8758	0.3142	99.1194	64.1917
XAL 118A	PLAG 2	51.3475	0.0868	30.3135	0.277	0.0386	0.1192	12.7718	3.8515	0.3124	99.1183	63.4985
XAL 118A	PLAG 2	51.0758	0.0831	30.2727	0.3733	0.0228	0.0945	12.967	3.7848	0.3291	99.003	64.1677
XAL 118A	PLAG 2	51.2922	0.1151	30.1244	0.3281	-0.0353	0.0898	13.3606	4.0592	0.3288	99.6629	63.3272
XAL 118A	PLAG 2	50.6336	0.1349	30.4288	0.2518	-0.0121	0.107	13.2612	4.0398	0.3899	99.2349	63.0404
XAL 118A	PLAG 2	50.8496	0.0864	30.0542	0.3249	-0.0026	0.0706	13.2931	3.9861	0.2846	98.9469	63.7709
XAL 118A	PLAG 2	50.6477	0.0829	30.2732	0.2935	0.0195	0.0988	13.5678	3.7109	0.3138	99.008	65.6813
XAL 118A	PLAG 2	50.6809	0.0285	30.7186	0.2917	-0.0246	0.0379	13.3528	3.742	0.3541	99.1818	64.9903
XAL 118A	PLAG 2	51.5554	0.1081	29.6182	0.2989	-0.0437	0.194	13.1014	3.9631	0.3016	99.0971	63.4989
XAL 118A	PLAG 2	50.9302	0.083	30.4039	0.3383	-0.0018	0.1235	13.1263	3.8539	0.3416	99.1988	64.0084
XAL 118A	PLAG 2	50.888	0.0752	30.4964	0.324	0.0198	0.095	12.9853	4.0126	0.3459	99.2423	62.8573
XAL 118A	PLAG 2	50.8942	0.0736	30.1352	0.3563	-0.0525	0.064	12.8488	4.0042	0.2552	98.5792	62.9868
XAL 118A	PLAG 3	47.381	0.0498	32.9444	0.2689	0.0114	0.0938	16.1869	2.4074	0.1341	99.4777	78.1855
XAL 118A	PLAG 3	47.9369	0.059	32.2027	0.3978	-0.025	0.0499	15.4549	2.6541	0.1845	98.9148	75.4726
XAL 118A	PLAG 3	49.2077	0.0696	31.8191	0.3238	-0.0198	0.0895	14.8246	3.1189	0.2353	99.6685	71.4484
XAL 118A	PLAG 3	49.9337	0.0828	30.768	0.2538	0.0162	0.1245	14.0803	3.4191	0.2714	98.9498	68.3814
XAL 118A	PLAG 3	48.8624	0.0442	32.1488	0.3124	-0.0356	0.1237	14.893	3.0899	0.1932	99.632	71.8959
XAL 118A	PLAG 3	49.3599	0.0342	31.6592	0.3152	-0.0033	0.0727	14.5545	3.1778	0.1724	99.3425	70.9623
XAL 118A	PLAG 3	50.3311	0.0605	31.3941	0.3307	-0.0158	0.076	14.1005	3.2959	0.2231	99.7961	69.3561
XAL 118A	PLAG 3	49.6946	0.08	31.295	0.3257	-0.004	0.1933	14.1625	3.4662	0.3134	99.5266	68.0618
XAL 118A	PLAG 3	49.7934	0.0555	30.7334	0.3235	0.0253	0.1094	14.0246	3.4731	0.286	98.8242	67.9156
XAL 118A	PLAG 3	50.5676	0.0725	31.1475	0.3499	0.0213	0.0714	14.0061	3.4653	0.3305	100.032	67.7587
XAL 118A	PLAG 4	51.2358	0.0595	30.5725	0.3706	-0.0202	0.0795	13.3745	3.7021	0.2824	99.6567	65.5283
XAL 118A	PLAG 4	50.5019	0.0742	30.4256	0.3826	-0.0011	0.0864	13.5879	3.82	0.2612	99.1387	65.2891
XAL 118A	PLAG 4	51.3896	0.0881	30.3684	0.2989	0.0073	0.0673	13.4293	3.7552	0.2888	99.6928	65.2899
XAL 118A	PLAG 4	50.7876	0.0597	30.323	0.2815	-0.0617	0.1061	13.7219	3.9124	0.2759	99.4065	64.9399
XAL 118A	PLAG 4	50.6178	0.0987	30.8149	0.3183	-0.0349	0.0959	13.4305	3.7441	0.293	99.3783	65.3395
XAL 118A	PLAG 4	50.4226	0.0842	30.5649	0.2612	-0.0345	0.0817	13.4882	3.568	0.2908	98.7272	66.473
XAL 118A	PLAG 4	50.4361	0.0873	31.0627	0.3191	-0.0378	0.0985	13.5806	3.4324	0.2676	99.2464	67.5299
XAL 118A	PLAG 4	50.4835	0.1146	30.7532	0.3237	-0.0051	0.0562	13.2134	3.694	0.312	98.9454	65.1885
XAL 118A	PLAG 4	50.6594	0.1092	30.5565	0.2568	-0.0595	0.0826	13.9378	3.7605	0.301	99.6045	66.0519
XAL 118A	PLAG 4	50.4397	0.1063	30.3884	0.3233	0.0445	0.0615	13.3365	3.7713	0.2592	98.7307	65.1523
XAL 118A	PLAG 4	50.1726	0.0783	30.7268	0.3406	-0.0066	0.1393	13.193	3.7484	0.3141	98.7064	64.8298
XAL 118A	PLAG 4	50.6648	0.0904	30.5709	0.3343	-0.0048	0.1003	12.8767	3.8136	0.2933	98.7394	63.9772
XAL 118A	PLAG 4	51.5756	0.0763	30.4068	0.319	0.0202	0.072	13.2497	3.8297	0.3269	99.8762	64.4149
XAL 118A	PLAG 4	50.7471	0.1103	30.3702	0.299	0.0096	0.0991	13.3209	4.025	0.3772	99.3584	63.2706
XAL 118A	PLAG 5	51.0549	0.1336	30.7251	0.6122	-0.0375	0.0803	13.7783	3.5566	0.2864	100.19	67.0302
XAL 118A	PLAG 5	49.9769	0.0827	30.5145	0.5729	0.0195	0.0658	14.222	3.3442	0.3638	99.1623	68.6821
XAL 118A	PLAG 5	50.2056	0.3145	29.5003	1.3305	0.0264	0.6768	13.0171	3.7437	0.5324	99.3474	63.7287
XAL 118A	PLAG 5	49.5889	0.0993	30.8419	0.4327	0.0349	0.1334	14.1338	3.3935	0.2398	98.8983	68.7431
XAL 118A	PLAG 5	49.4922	0.0808	31.2391	0.4127	0.0143	0.0913	14.4043	3.3425	0.2144	99.2917	69.5571
XAL 118A	PLAG 5	49.5867	0.0833	31.0134	0.4861	0.0059	0.1186	14.3181	3.1324	0.2292	98.9737	70.6734
XAL 118A	PLAG 5	50.1699	0.0746	30.7939	0.4591	-0.0004	0.112	13.9424	3.1638	0.3093	99.0246	69.5866
XAL 118A	PLAG 5	50.0686	0.0829	31.2013	0.5431	-0.0026	0.0939	14.2765	3.2845	0.2819	99.8301	69.4526
XAL 118A	PLAG 5	49.126	0.1157	31.2246	0.4645	-0.0327	-0.041	14.3611	3.1355	0.2271	98.5809	70.7246
XAL 118A	PLAG 5	51.3842	0.0873	30.0196	0.5437	0.0235	0.0666	12.9238	4.0674	0.3564	99.4726	62.408
XAL 118A	PLAG 5	50.4689	0.1044	30.9373	0.5066	0.0055	0.1023	13.7315	3.5808	0.3306	99.768	66.6405
XAL 118A	PLAG 6	49.556	0.1348	30.9226	0.595	0.011	0.0626	14.4896	3.0392	0.3425	99.1534	71.0371
XAL 118A	PLAG 6	49.5573	0.0745	31.3413	0.3973	0.0477	0.1376	14.7514	3.0815	0.2206	99.6092	71.6421
XAL 118A	PLAG 6	50.7328	0.0768	30.5489	0.4421	0.0316	0.1148	13.7818	3.516	0.2821	99.527	67.2931
XAL 118A	PLAG 6	50.5973	0.0833	30.5547	0.4167	-0.0481	0.1155	13.7716	3.567	0.2758	99.3337	66.9991
XAL 118A	PLAG 6	49.686	0.1077	30.7589	0.3977	-0.0272	0.1304	14.1887	3.3405	0.2503	98.833	69.1064
XAL 118A	PLAG 6	50.3153	0.1025	30.8968	0.3927	-0.0378	0.1075	14.0848	3.4915	0.2588	99.612	68.0056
XAL 118A	PLAG 6	50.9981	0.1286	30.1222	0.4598	-0.0389	0.1209	13.6086	3.9118	0.3349	99.646	64.5372
XAL 118A	PLAG 6	50.6455	0.0707	30.1114	0.5188	-0.007	0.1161	13.3724	3.6489	0.2697	98.7466	65.8848
XAL 118A	PLAG 7	53.9136	0.016	28.609	0.1208	0.0059	0.0158	10.7934	5.4549	0.0891	99.0186	51.9641
XAL 118A	PLAG 7	54.386	0.0385	28.6437	0.0933	-0.0195	-0.0078	10.749	5.4034	0.1528	99.4392	51.9045
XAL 118A	PLAG 7	54.8033	0.0499	28.7236	0.1111	-0.0283	-0.0023	10.5539	5.5634	0.1742	99.9487	50.6695
XAL 118A	PLAG 7	54.406	0.063	28.5116	0.0863	0.0342	0.0065	10.5626	5.7886	0.1826	99.6415	49.694
XAL 118A	PLAG 7	54.9325	0.0089	28.4543	0.1335	-0.0015	0.0136	10.3182	5.6762	0.136	99.6716	49.7217
XAL 118A	PLAG 7	56.0631	0.0227	27.2055	0.1212	0.0121	0.0329	9.2335	6.1602	0.2811	99.1323	44.5719
XAL 118A	PLAG 7	55.4097	0.0106	27.6754	0.1625	-0.0077	0.0051	9.9542	5.8246	0.1807	99.2152	48.0658
XAL 118A	PLAG 7	54.832	0.0436	28.0722	0.1472	0.0199	0.0136	10.3084	5.3298	0.5816	99.3482	49.9295
XAL 118A	PLAG 7	49.8941	0.0859	31.3202	0.5063	-0.0176	0.1397	14.9319	3.1242	0.2268	100.211	71.5963
XAL 118A	PLAG 7	50.4717	0.1137	30.4422	0.4669	-0.0081	0.1164	14.1833	3.3882	0.2713	99.4456	68.7248
XAL 118A	PLAG 7	50.09	0.0818	30.9672	0.7063	-0.0503	0.1041	14.1015	3.6159	0.3091	99.9255	67.1088
XAL 118A	PLAG 7	53.9015	0.0372	29.1489	0.1583	0.0165	0.0364	10.7853	4.9763	0.5343	99.5948	52.7999
XAL 118A	PLAG 7	48.7915	0.3812	30.5279	0.9081	0.0316	0.3573	14.277	3.1993	0.3128	98.7865	69.8519
XAL 118A	PLAG 7	49.8469	0.0931	31.4836	0.5013	-0.0033	0.1042	14.0932	3.3241	0.3407	99.7838	68.6996
XAL 118A	PLAG 7	50.3121	0.0905	30.8691	0.387	-0.0143	0.1829	14.1055	3.433	0.2756	99.6414	68.3207
XAL 118A	PLAG 7	49.1596	0.1208	31.1875	0.4302	-0.0022	0.1909	14.4745	3.2307	0.2648	99.0568	70.1407
XAL 118A	PLAG 8	49.7027	0.0229	31.5326	0.398	0.0253	0.1484	14.7613	3.1156	0.2017	99.9085	71.5198
XAL 118A	PLAG 8	49.1025	0.1102	31.7418	0.4446	-0.0217	0.0837	14.9562	2.9701	0.1994	99.5869	72.714
XAL 118A	PLAG 8	49.6666	0.0741	30.8889	0.4301	-0.0022	0.1624	14.536	3.0711	0.2711	99.0981	71.1973
XAL 118A	PLAG 8	49.2718	0.0675	31.7473	0.3783	0.0081	0.1217	14.8065	2.908	0.1807	99.4898	72.9959
XAL 118A	PLAG 8	49.332	0.1322	31.1565	0.3634	0.0206	0.1608	14.5673	3.0394	0.1934	98.9656	71.7679
XAL 118A	PLAG 8	48.8787	0.0916	31.7208	0.3528	0.0077	0.1178	14.9277	3.0878	0.2121	99.397	71.8791
XAL 118A	PLAG 8	49.2348	0.0645	31.1081	0.4097	-0.0206	0.1312	14.7441	3.0604	0.1911	98.9234	71.8872
XAL 118A	PLAG 8	49.6068	0.0618	31.0742	0.447	0.0485	0.1449	14.705	3.0834	0.2143	99.3858	71.5921
XAL 118A	PLAG 8	49.5931	0.0647	31.3613	0.4374	-0.0275	0.1468	14.6801	2.9796	0.2206	99.4561	72.1918
XAL 118A	PLAG 9	48.8042	0.098	31.082	0.5035	0.0323	0.1778	14.4449	3.1326	0.2374	98.5128	70.8204
XAL 118A	PLAG 9	49.8691	0.1145	30.4633	0.5037	0.0283	0.1326	14.0911	3.4822	0.2482	98.933	68.1117
XAL 118A	PLAG 9	50.6965	0.09	30.3005	0.4839	0.0242	0.1563	13.6655	3.681	0.2401	99.3379	66.2972
XAL 118A	PLAG 9	49.9406	0.0788	31.0588	0.5628	0.0338	0.0635	13.6868	3.534	0.322	99.281	66.8778
XAL 118A	PLAG 9	49.5222	0.1046	31.0373	0.4622	-0.0235	0.0984	14.1614	3.3307	0.2734	98.9666	69.0329
XAL 118A	PLAG 9	50.5521	0.0569	30.5023	0.4468	0.0176	0.1769	14.1238	3.7768	0.3029	99.9561	66.2494
XAL 118A	PLAG 9	50.4261	0.1197	30.5372	0.4645	0.0286	0.1257	13.9917	3.6171	0.2272	99.5379	67.2422
XAL 118A	PLAG 10	49.7918	0.1248	31.149	0.4644	0.0165	0.2091	14.0336	3.2951	0.2315	99.3159	69.2253
XAL 118A	PLAG 10	50.2219	0.1052	30.6573	0.3847	-0.0176	0.1574	14.1101	3.5439	0.3071	99.4699	67.5481
XAL 118A	PLAG 10	49.1314	0.1153	31.5095	0.5008	0.0228	0.1416	14.5861	3.0508	0.2478	99.3061	71.4932
XAL 118A	PLAG 10	49.4871	0.1098	31.3183	0.499	0.0613	0.1271	14.1987	3.2911	0.2565	99.3489	69.3977
XAL 118A	PLAG 10	49.9009	0.0985	31.1355	0.487	0.0217	0.1326	14.0796	3.4112	0.2293	99.4963	68.5948
XAL 118A	PLAG 10	49.259	0.0915	31.3481	0.4147	-0.0202	0.1427	15.017	3.0685	0.1554	99.4768	72.3541
XAL 118A	PLAG 10	49.4551	0.1344	31.1527	0.4215	-0.0037	0.1517	14.5025	3.1589	0.2816	99.2548	70.5566
XAL 118A	PLAG 11	50.5503	0.1128	30.4593	0.5211	0.0037	0.164	13.9347	3.6247	0.3094	99.6798	66.7929
XAL 118A	PLAG 11	50.23	0.0937	30.7587	0.4889	-0.0173	0.1742	14.4623	3.2056	0.2291	99.6253	70.4233
XAL 118A	PLAG 11	51.6507	0.1424	29.3061	0.4786	0.0467	0.1173	12.5514	4.2128	0.3377	98.8436	60.9972
XAL 118A	PLAG 11	50.1753	0.1104	31.0245	0.5386	-0.0217	0.1608	13.7692	3.557	0.2421	99.5562	67.1859
XAL 118A	PLAG 11	48.9206	0.1361	31.2741	0.4344	0.0176	0.125	14.8324	3.2026	0.1805	99.1232	71.163
XAL 118A	PLAG 11	49.3848	0.0914	31.5536	0.452	-0.0084	0.06	14.7283	2.9735	0.2227	99.4579	72.2887
XAL 118A	PLAG 11	49.1906	0.0637	31.631	0.4857	-0.0353	0.0998	14.7791	3.1612	0.2415	99.6172	71.0973
XAL 118A	PLAG 11	49.5647	0.079	31.3732	0.3851	0.0125	0.1118	14.6673	2.8763	0.2164	99.2864	72.8626
XAL 118A	PLAG 11	49.6417	0.1035	30.5944	0.4276	-0.0364	0.1622	14.1605	3.3692	0.2818	98.7044	68.7635
XAL 118A	PLAG 12	49.638	0.0622	31.2016	0.4722	0.004	0.1325	14.4044	3.2851	0.206	99.406	69.9427
XAL 118A	PLAG 12	50.7293	0.0892	30.4392	0.4299	-0.0272	0.1242	13.8918	3.4942	0.2695	99.4401	67.6466
XAL 118A	PLAG 12	50.6472	0.0564	30.091	0.397	-0.007	0.158	13.6804	3.4816	0.2864	98.7911	67.3191
XAL 118A	PLAG 12	50.3367	0.166	30.3171	0.6473	-0.0327	0.0939	13.6571	3.7907	0.3409	99.3171	65.274
XAL 118A	PLAG 12	50.1423	0.062	30.6082	0.5359	0.0118	0.0668	13.6716	3.8131	0.3515	99.2632	65.1327
XAL 118A	PLAG 12	50.8171	0.0996	29.6921	0.5112	0.0092	0.0483	13.4131	3.8517	0.3581	98.8004	64.4564
XAL 118A	PLAG 12	50.643	0.0953	30.2782	0.4149	-0.0107	0.1363	13.2471	3.8059	0.3582	98.9682	64.4283
XAL 118A	PLAG 12	49.5873	0.0739	30.9736	0.4047	-0.0353	0.1188	14.5516	3.2258	0.1744	99.0748	70.6498
XAL 118A	PLAG 12	49.5972	0.0837	31.1605	0.3605	0.0239	0.1645	14.5063	3.1831	0.2039	99.2835	70.7306
XAL 118A	PLAG 13	50.3575	0.0848	30.6575	0.5142	0.014	0.1469	13.7645	3.5946	0.2527	99.3867	66.9139
XAL 118A	PLAG 13	49.7763	0.106	30.5162	0.3382	-0.0151	0.1553	14.1634	3.3282	0.1788	98.5473	69.4316
XAL 118A	PLAG 13	50.2972	0.1061	31.1282	0.4124	-0.0264	0.1446	14.027	3.3993	0.3409	99.8292	68.1434
XAL 118A	PLAG 13	50.0882	0.1186	31.0079	0.3751	0.0305	0.1717	14.3504	3.1277	0.2019	99.472	70.8639
XAL 118A	PLAG 13	50.7667	0.1081	30.4098	0.3857	0.0022	0.1497	13.6034	3.7638	0.2949	99.4842	65.5093
XAL 118A	PLAG 13	50.2243	0.0996	31.0296	0.531	0.0055	0.1721	14.4716	3.288	0.2229	100.044	69.9558
XAL 118A	PLAG 13	49.833	0.0593	31.2596	0.3773	-0.0198	0.1242	14.3125	3.0228	0.2082	99.1771	71.453
XAL 118A	PLAG 13	50.0659	0.1007	30.778	0.3505	-0.0062	0.1566	14.3051	3.381	0.1851	99.3166	69.2951
XAL 118A	PLAG 13	50.0672	0.0898	31.0151	0.5599	-0.0051	0.1139	14.2295	3.3163	0.2839	99.6705	69.179
XAL 118A	PLAG 14	49.5147	0.0694	31.1103	0.3729	0.0033	0.1694	14.6492	3.0428	0.2227	99.1547	71.7372
XAL 118A	PLAG 14	49.3994	0.058	31.5529	0.3587	-0.0118	0.1724	14.7088	3.1611	0.2332	99.6329	71.0338
XAL 118A	PLAG 14	49.8652	0.0725	31.1555	0.2663	0.0492	0.1103	14.1873	3.1168	0.2315	99.0545	70.5723
XAL 118A	PLAG 14	50.8341	0.1105	30.3769	0.3786	0.0448	0.1633	14.0809	3.3428	0.2694	99.6011	68.8526
XAL 118A	PLAG 14	50.1682	0.0645	30.8283	0.3973	0.0423	0.1733	13.9902	3.4331	0.2442	99.3414	68.2662
XAL 118A	PLAG 14	50.4016	0.0896	30.1305	0.3207	-0.0272	0.1641	14.0081	3.5247	0.3031	98.9151	67.5175
XAL 118A	PLAG 14	49.7728	0.0749	31.6186	0.3982	-0.0051	0.1401	14.2962	3.175	0.2019	99.6726	70.486
XAL 118A	PLAG 14	50.2529	0.0833	31.0658	0.3306	-0.0147	0.1393	14.5032	3.1897	0.2166	99.7668	70.6325
XAL 118A	PLAG 15	49.3466	0.0728	31.6981	0.4397	0.0055	0.1493	14.8831	3.1706	0.2184	99.9842	71.2761
XAL 118A	PLAG 15	48.9819	0.0892	31.5213	0.3878	0.0015	0.1283	14.7595	2.9766	0.1701	99.0162	72.5324
XAL 118A	PLAG 15	50.3562	0.0909	30.9191	0.3972	0.0301	0.1194	14.0906	3.3364	0.2378	99.5778	69.0328
XAL 118A	PLAG 15	50.1698	0.0969	30.6788	0.4164	0.0375	0.1582	13.9571	3.659	0.2209	99.3945	66.9678
XAL 118A	PLAG 15	50.7232	0.1148	30.481	0.4055	0.0147	0.1286	13.5561	3.7268	0.2886	99.4393	65.666
XAL 118A	PLAG 15	50.1784	0.1041	30.4783	0.3553	0.0364	0.1639	14.1078	3.6199	0.2651	99.3091	67.2631
XAL 118A	PLAG 15	50.1257	0.1275	30.9903	0.4425	-0.0209	0.1257	14.2156	3.4367	0.2755	99.7185	68.4674
XAL 118A	PLAG 15	49.6432	0.043	31.3	0.3278	0.0066	0.1555	14.6343	3.2891	0.1997	99.5991	70.2759
XAL 118A	PLAG 15	50.1761	0.102	31.0849	0.4347	-0.0066	0.1532	14.1926	3.544	0.2125	99.8934	68.0414
XAL 118A	PLAG 16	49.2705	0.0887	31.734	0.4116	-0.0195	0.171	14.8347	3.1202	0.2689	99.88	71.3166
XAL 118A	PLAG 16	49.6817	0.1106	31.1098	0.4394	0.007	0.1416	14.5823	3.3107	0.2669	99.65	69.8011
XAL 118A	PLAG 16	50.0616	0.0804	30.6679	0.4693	0.0239	0.1765	13.9941	3.4113	0.2356	99.1206	68.438
XAL 118A	PLAG 16	49.3413	0.1124	31.5161	0.3633	-0.0268	0.0972	15.0895	3.0903	0.2225	99.8057	72.0369
XAL 118A	PLAG 16	49.7853	0.1039	30.9532	0.509	0.0154	0.0103	14.23	3.3019	0.2208	99.1299	69.5223
XAL 118A	PLAG 16	48.8141	0.0818	31.31	0.4817	0.0026	0.0802	14.863	3.2413	0.2205	99.0951	70.806
XAL 118A	PLAG 16	49.3104	0.0474	30.9348	0.4418	-0.0294	0.0973	14.5735	3.1312	0.2249	98.7317	71.0645
XAL 118A	PLAG 16	50.0338	0.05	30.5917	0.4839	-0.0162	0.1147	14.2498	3.2828	0.2335	99.0241	69.6191
XAL 118A	PLAG 16	50.1391	0.0906	30.472	0.4453	-0.0228	0.1445	13.751	3.5707	0.32	98.9105	66.7732
XAL 118A	PLAG 17	49.196	0.0657	31.0658	0.4031	0.0338	0.1345	14.535	3.1017	0.2122	98.7477	71.2468
XAL 118A	PLAG 17	49.3659	0.0891	30.8807	0.4718	-0.0158	0.1539	14.3027	3.1036	0.2124	98.5643	70.9046
XAL 118A	PLAG 17	49.468	0.1067	31.2795	0.3954	0.0073	0.1404	14.3231	3.416	0.2313	99.3677	68.9264
XAL 118A	PLAG 17	49.7414	0.0821	31.0979	0.4351	-0.0261	0.1093	14.551	3.2135	0.2585	99.4628	70.3829
XAL 118A	PLAG 17	49.9741	0.1128	31.211	0.3728	-0.0386	0.156	14.3865	3.3163	0.2566	99.7476	69.5232
XAL 118A	PLAG 17	50.36	0.0732	31.0624	0.3972	-0.0184	0.1257	14.3826	3.1702	0.2019	99.7548	70.6426
XAL 118A	PLAG 17	49.9411	0.1093	30.3939	0.4277	-0.0231	0.1486	14.2122	3.178	0.2629	98.6504	70.0932
XAL 118A	PLAG 17	49.4649	0.1122	30.9026	0.3801	-0.0342	0.1521	14.62	3.1453	0.2354	98.9785	70.9978
XAL 118A	PLAG 17	50.8072	0.089	30.7172	0.3999	-0.0261	0.1232	14.0896	3.5531	0.221	99.9741	67.7954
XAL 118A	PLAG 17	49.68	0.096	31.4415	0.4431	0.0558	0.1382	14.3818	3.1515	0.2419	99.6298	70.5934
XAL 118A	PLAG 18	49.5867	0.1019	31.4177	0.5163	-0.0253	0.1072	14.5293	3.1235	0.3236	99.6808	70.6439
XAL 118A	PLAG 18	50.2285	0.1203	30.848	0.4662	0.0187	0.1215	13.9904	3.5048	0.2651	99.5635	67.7558
XAL 118A	PLAG 18	50.5332	0.1216	30.5134	0.4274	-0.0015	0.1259	14.336	3.4629	0.2019	99.7208	68.7806
XAL 118A	PLAG 18	49.9972	0.124	31.0748	0.4221	-0.0613	0.1335	14.5111	3.3311	0.2018	99.7343	69.8332
XAL 118A	PLAG 18	49.4571	0.0749	31.0239	0.4489	0.0165	0.117	14.8776	3.3152	0.2226	99.5537	70.3705
XAL 118A	PLAG 18	49.9437	0.0768	31.3381	0.5562	0.0514	0.0788	14.7055	3.1924	0.25	100.193	70.7665
XAL 118A	PLAG 18	49.1045	0.0721	31.8303	0.5185	0.0309	0.1066	14.6665	2.9829	0.2248	99.5369	72.1348
XAL 118A	PLAG 18	49.4493	0.1156	30.9778	0.6543	0.0264	0.149	14.2355	3.1781	0.2186	99.0046	70.3091
XAL 118A	PLAG 18	51.5367	0.101	29.7633	0.5092	0.0419	0.1675	13.2626	3.6997	0.3372	99.4191	65.1424
XAL 118A	PLAG 19	49.7168	0.0884	31.3654	0.4422	0.0485	0.1668	14.8653	3.3384	0.2562	100.288	70.0814
XAL 118A	PLAG 19	50.6632	0.0887	31.0795	0.385	0.0022	0.1884	14.1801	3.1451	0.2083	99.9405	70.4783
XAL 118A	PLAG 19	50.4762	0.088	30.5746	0.5231	-0.0382	0.1447	13.5166	3.6253	0.297	99.2072	66.1581
XAL 118A	PLAG 19	49.7392	0.0647	30.8241	0.423	0.0195	0.1481	14.3033	3.3173	0.265	99.104	69.3601
XAL 118A	PLAG 19	50.5082	0.0944	30.4343	0.3731	0.0096	0.1648	14.3119	3.3538	0.2167	99.4665	69.3441
XAL 118A	PLAG 19	50.6729	0.101	30.8125	0.4519	0.0007	0.161	13.9629	3.5382	0.28	99.9812	67.457
XAL 118A	PLAG 19	50.2977	0.1265	30.3278	0.4103	-0.0004	0.1091	13.8912	3.4659	0.2293	98.8576	67.9731
XAL 118A	PLAG 19	51.0961	0.1012	29.8809	0.474	-0.0404	0.1704	13.655	3.6647	0.2654	99.2672	66.2779
XAL 118A	PLAG 19	51.056	0.086	30.2821	0.5118	0.0254	0.1461	14.1112	3.4805	0.2674	99.9662	68.0781
XAL 118A	PLAG 19	49.2564	0.0762	30.9866	0.3678	0.0107	0.1309	14.9664	3.0731	0.2079	99.076	72.0392
XAL 118A	PLAG 20	50.2472	0.1043	30.5905	0.4499	0.0037	0.1564	14.4434	3.3902	0.2775	99.663	69.0785
XAL 118A	PLAG 20	49.806	0.1391	30.6615	0.4054	0.025	0.1408	13.8874	3.603	0.2378	98.906	67.119
XAL 118A	PLAG 20	50.0658	0.0969	31.1818	0.4592	-0.0062	0.1015	14.1429	3.3876	0.2903	99.7197	68.592
XAL 118A	PLAG 20	50.4646	0.1131	30.3342	0.598	-0.025	0.1102	13.5116	3.6012	0.3874	99.0953	65.9427
XAL 118A	PLAG 20	50.0701	0.0968	30.6572	0.5362	-0.0353	0.116	13.9454	3.4123	0.2609	99.0596	68.2556
XAL 118A	PLAG 20	51.3017	0.0928	30.5995	0.4568	0.0573	0.1621	13.6997	3.596	0.2718	100.238	66.7286
XAL 118A	PLAG 20	50.165	0.1138	30.5925	0.4587	-0.0162	0.0922	14.2488	3.5712	0.2797	99.5057	67.7085
XAL 118A	PLAG 20	50.0189	0.0772	30.9654	0.5518	-0.0452	0.0635	14.345	3.2544	0.2797	99.5105	69.7468
XAL 118A	PLAG 20	50.2712	0.0654	30.9296	0.558	-0.0044	0.1318	13.8527	3.4079	0.2694	99.4817	68.1042
XAL 118A	PLAG 21	50.2246	0.1309	30.6036	0.494	0.0088	0.1032	14.1731	3.5959	0.2776	99.6118	67.4563
XAL 118A	PLAG 21	49.6965	0.0316	30.7081	0.4716	0.0092	0.1482	14.3227	3.3237	0.2145	98.9259	69.5526
XAL 118A	PLAG 21	50.7799	0.0814	31.2041	0.4418	0.0162	0.1024	13.9523	3.4279	0.2589	100.265	68.1806
XAL 118A	PLAG 21	50.1246	0.0766	30.564	0.4252	-0.0029	0.1264	14.0055	3.5161	0.2399	99.0754	67.81
XAL 118A	PLAG 21	50.7851	0.092	30.3293	0.5529	-0.0239	0.111	13.4053	3.6827	0.2402	99.1746	65.8556
XAL 118A	PLAG 21	50.1145	0.0759	30.3556	0.4943	-0.0092	0.1224	13.9756	3.6875	0.2672	99.0837	66.6562
XAL 118A	PLAG 21	50.0934	0.1104	30.9871	0.536	0.0342	0.1331	14.1554	3.3595	0.2839	99.6928	68.8063
XAL 118A	PLAG 21	49.8272	0.0769	31.0952	0.57	-0.0088	0.1437	14.3543	3.1357	0.2502	99.4444	70.6183
XAL 118A	PLAG 22	50.3987	0.1226	30.6975	0.6712	-0.0121	0.1425	13.7747	3.4418	0.2652	99.5021	67.7922
XAL 118A	PLAG 22	49.403	0.081	31.2618	0.3977	-0.0415	0.1379	14.7684	3.0415	0.2395	99.2893	71.8386
XAL 118A	PLAG 22	49.4582	0.1049	31.2118	0.3936	-0.0356	0.1756	14.3954	3.2341	0.2333	99.1713	70.1333
XAL 118A	PLAG 22	49.2339	0.1119	31.082	0.3652	0.0176	0.1485	14.3766	3.2003	0.1871	98.7232	70.5055
XAL 118A	PLAG 22	49.759	0.0519	31.4197	0.4395	0.004	0.154	14.5415	3.2714	0.2039	99.845	70.2347
XAL 118A	PLAG 22	50.6452	0.1098	30.7424	0.4686	-0.0275	0.1768	13.8646	3.2275	0.2505	99.4577	69.311
XAL 118A	PLAG 22	49.7653	0.0946	30.8843	0.4179	0.0066	0.1381	14.7458	3.1972	0.2543	99.5041	70.7762
XAL 118A	PLAG 22	49.1848	0.0654	31.0023	0.4318	-0.0059	0.134	14.3726	3.0873	0.2375	98.5098	71.0019
XAL 118A	PLAG 22	49.365	0.0903	30.8478	0.4997	0.0331	0.1454	14.7642	3.2432	0.2373	99.226	70.5888
XAL 118A	PLAG 22	49.6964	0.1099	31.1731	0.4293	-0.0569	0.1161	14.3223	3.057	0.2587	99.1057	71.0351
XAL 118A	PLAG 23	51.1984	0.0939	29.7911	0.5749	0.0334	0.1172	13.2294	3.9131	0.2719	99.2234	64.1132
XAL 118A	PLAG 23	50.1214	0.119	31.2873	0.4098	-0.0474	0.139	14.6004	3.1599	0.2438	100.033	70.8458
[truncated: 2,460 more rows]

## Sheet: TableS8.Plagioclasehygrometry
TABLE S8. PLAGIOCLASE PEAK POPULATION AN CONTENT AND CALCULATED TEMPERATURE OF SANGANGÜEY HAWAIITES*
[truncated: 7 more rows]

[truncated: 2 more sheets: TableS9. Fe-Tioxidecompositions, TableS10.Hawaiite_TNi]
